# Supplementary material for: Hybrid Origins of Citrus Varieties Inferred from DNA Marker Analysis of Nuclear and Organelle Genomes
Source: PubMed Central journal article supplement (PMC5130255; doi:10.1371/journal.pone.0166969), 2016-11-30
Supplement: pone.0166969.s004.pdf [file pone.0166969.s004.pdf]

Table S1. All plant materials used in this study

| A. Indigenous varieties |     |                      |                                       |    |                                                                |              |
|-------------------------|-----|----------------------|---------------------------------------|----|----------------------------------------------------------------|--------------|
| ID                      | Rep | Variety name         | Strain name                           | RA | Scientific name                                                | Accession ID |
| A001                    | *   | Andoukan             | (Stock strain)                        | 1  | <i>C. maxima</i> (hybrid)                                      | 115520       |
| A002                    | *   | Anseikan             | (Stock strain)                        | 1  | <i>C. grandis</i> Osbeck var. anseikan hort. ex Tanaka         | 117431       |
| A003                    | *   | Asahikan             | (Stock strain)                        | 1  | <i>C. asahikan</i> hort. ex Tanaka                             | 113333       |
| A004                    | *   | Banpeiyu             | (Stock strain)                        | 1  | <i>C. maxima</i> Merr.                                         | 171506       |
| A005                    | *   | Bendizao             | (Stock strain)                        | 1  | <i>C. succosa</i> hort. ex Tanaka                              | 171488       |
| A006                    | *   | Bergamot             | (Stock strain)                        | 1  | <i>C. bergamia</i> Risso                                       | 113223       |
| A007                    | *   | Bendiguangju         | (Honchi Kokitsu)                      | 1  | <i>C. spp</i>                                                  | 113459       |
| A008                    | *   | Binkitsu             | (Stock strain)                        | 2  | <i>C. platymamma</i> hort. ex Tanaka                           | 113168       |
| A009                    | *   | Clementine           | (Stock strain)                        | 1  | <i>C. clementina</i> hort. ex Tanaka                           | 113161       |
| A010                    | *   | Clementine           | A Peau Fin                            | 1  | <i>C. clementina</i> hort. ex Tanaka                           | 117392       |
| A011                    | *   | Clementine           | Caffin                                | 1  | <i>C. clementina</i> hort. ex Tanaka                           | 113163       |
| A012                    | *   | Clementine           | de Nules                              | 1  | <i>C. clementina</i> hort. ex Tanaka                           | 181745       |
| A013                    | *   | Cleopatra            | (Stock strain)                        | 2  | <i>C. reshni</i> hort. ex Tanaka                               | 117402       |
| A014                    | *   | Cravo                | (Stock strain)                        | 1  | <i>C. spp</i>                                                  | 113160       |
| A015                    | *   | Dada                 | (Stock strain)                        | 1  | <i>C. luteo-turgida</i> Tanaka                                 | 117375       |
| A016                    | *   | Dancy                | (Stock strain)                        | 1  | <i>C. tangerina</i> hort. ex Tanaka                            | 117396       |
| A017                    | *   | Dancy                | Obenimikan                            | 2  | <i>C. tangerina</i> hort. ex Tanaka                            | 117395       |
| A018                    | *   | Egami buntan         | (Stock strain)                        | 1  | <i>C. maxima</i> Merr.                                         | 168898       |
| A019                    | *   | Fukure mikan         | (Stock strain)                        | 1  | <i>C. tumida</i> hort. ex Tanaka                               | 117407       |
| A020                    | *   | Fukushukan           | (Stock strain)                        | 1  | <i>C. spp</i>                                                  | 113371       |
| A021                    | *   | Funadoko             | (Stock strain)                        | 2  | <i>C. funadoko</i> hort. ex Yu.Tanaka                          | 117372       |
| A022                    | *   | Genshokan            | (Stock strain)                        | 1  | <i>C. genshokan</i> hort. ex Tanaka                            | 113159       |
| A023                    | *   | Girimikan            | (Stock strain)                        | 2  | <i>C. tardiva</i> hort. ex Shirai                              | 117404       |
| A024                    | *   | Grapefruit           | Marsh                                 | 1  | <i>C. paradisi</i> Macfad.                                     | 171496       |
| A025                    | *   | Grapefruit           | Red blush                             | 1  | <i>C. paradisi</i> Macfad.                                     | 117298       |
| A026                    | *   | Grapefruit           | Triumph                               | 1  | <i>C. paradisi</i> Macfad.                                     | 113255       |
| A027                    | *   | Hanayu               | (Stock strain)                        | 1  | <i>C. hanaju</i> Siebold ex Shirai                             | 117378       |
| A028                    | *   | Hassaku              | (Stock strain)                        | 2  | <i>C. hassaku</i> hort. ex Tanaka                              | 117286       |
| A029                    | *   | Hebesu               | (Stock strain)                        | 1  | <i>C. junos</i> (hybrid)                                       | 168863       |
| A030                    | *   | Henka mikan          | (Stock strain)                        | 1  | <i>C. pseudo-aurantium</i> hort. ex Yu.Tanaka                  | 117382       |
| A031                    | *   | Hickson              | (Sporting limb on 'Ellendale' tangor) | 1  | <i>C. spp</i>                                                  | 113369       |
| A032                    | *   | Hirado buntan        | (Stock strain)                        | 3  | <i>C. maxima</i> Merr.                                         | 171507       |
| A033                    | *   | Hiroshimanatsubuntan | (Stock strain)                        | 1  | <i>C. hiroshimana</i> hort. ex Yu.Tanaka                       | 171491       |
| A034                    | *   | Houraikan            | (Stock strain)                        | 1  | <i>C. ujukitsu</i> hort. ex Tanaka                             | 117376       |
| A035                    | *   | Hyoukan              | (Stock strain)                        | 2  | <i>C. ampullacea</i> hort. ex Tanaka                           | 113365       |
| A036                    | *   | Hyuganatsu           | (Stock strain)                        | 1  | <i>C. tamurana</i> hort. ex Tanaka                             | 117317       |
| A037                    | *   | Hyuganatsu           | Ihara 1                               | 1  | <i>C. tamurana</i> hort. ex Tanaka                             | 223668       |
| A038                    | *   | Hyuganatsu           | Muroto Konatsu                        | 2  | <i>C. tamurana</i> hort. ex Tanaka                             | 115758       |
| A039                    | *   | Hyuganatsu           | Orange Hyuga                          | 1  | <i>C. tamurana</i> hort. ex Tanaka                             | 117316       |
| A040                    | *   | Hyuganatsu           | Shoukakukei Hyuganatsu                | 1  | <i>C. tamurana</i> hort. ex Tanaka                             | 116984       |
| A041                    | *   | Ichanchii            | (Stock strain)                        | 2  | <i>C. ichangensis</i> Swingle                                  | NA           |
| A042                    | *   | Ichang lemon         | (Stock strain)                        | 2  | <i>C. wilsonii</i> Tanaka                                      | 117384       |
| A043                    | *   | Iyo                  | Miyauchi Iyo                          | 1  | <i>C. iyo</i> hort. ex Tanaka                                  | 117373       |
| A044                    | *   | Iyo                  | Ootani Iyo                            | 1  | <i>C. iyo</i> hort. ex Tanaka                                  | 115518       |
| A045                    | *   | Jabara               | (Stock strain)                        | 1  | <i>C. junos</i> (hybrid)                                       | 113193       |
| A046                    | *   | Jabbon               | (Stock strain)                        | 1  | <i>C. junos</i> (hybrid)                                       | 117463       |
| A047                    | *   | Kabosu               | (Stock strain)                        | 2  | <i>C. sphaerocarpa</i> hort. ex Tanaka                         | 117381       |
| A048                    | *   | Kabuchi              | (Stock strain)                        | 2  | <i>C. keraji</i> hort. ex Tanaka var. kabuchii hort. ex Tanaka | 117390       |
| A049                    | *   | Kaikoukan            | (Stock strain)                        | 1  | <i>C. truncata</i> hort. ex Tanaka                             | 113343       |
| A050                    | *   | Kawabata             | (Stock strain)                        | 1  | <i>C. aurea</i> hort. ex Tanaka                                | 113344       |
| A051                    | *   | Kawachi bankan       | (Stock strain)                        | 1  | <i>C. maxima</i> Merr.                                         | 117412       |
| A052                    | *   | Keraji               | (Stock strain)                        | 3  | <i>C. keraji</i> hort. ex Tanaka                               | 117389       |
| A053                    | *   | Kikudaidai           | (Stock strain)                        | 1  | <i>C. canariculata</i> hort. ex Yu.Tanaka                      | 117371       |
| A054                    | *   | King                 | (Stock strain)                        | 2  | <i>C. nobilis</i> Lour.                                        | 117386       |
| A055                    | *   | Kinkoji              | (Stock strain)                        | 1  | <i>C. obovoidea</i> hort. ex I.Takah.                          | 117361       |
| A056                    | *   | Kinukawa             | (Stock strain)                        | 1  | <i>C. glaberrima</i> hort. ex Tanaka                           | 117278       |
| A057                    | *   | Kishu                | Hira Kishu                            | 2  | <i>C. kinokuni</i> hort. ex Tanaka                             | 117398       |
| A058                    | *   | Kishu                | Hisago Komikan                        | 1  | <i>C. kinokuni</i> hort. ex Tanaka                             | 117457       |
| A059                    | *   | Kishu                | Kishu                                 | 2  | <i>C. kinokuni</i> hort. ex Tanaka                             | 171490       |
| A060                    | *   | Kishu                | Kishu mikan                           | 1  | <i>C. kinokuni</i> hort. ex Tanaka                             | 171490       |
| A061                    | *   | Kishu                | Kishu mikan Ihara Ichijoji            | 2  | <i>C. kinokuni</i> hort. ex Tanaka                             | 117948       |
| A062                    | *   | Kishu                | Komikan Fukuyama (Kinkou PEARL)       | 1  | <i>C. kinokuni</i> hort. ex Tanaka                             | 117947       |
| A063                    | *   | Kishu                | Komikan Kawachi                       | 1  | <i>C. kinokuni</i> hort. ex Tanaka                             | 117951       |
| A064                    | *   | Kishu                | Komikan Tensui                        | 1  | <i>C. kinokuni</i> hort. ex Tanaka                             | 117949       |
| A065                    | *   | Kishu                | Kouda mikan                           | 1  | <i>C. kinokuni</i> hort. ex Tanaka                             | 117458       |
| A066                    | *   | Kishu                | Mukaku Kishu (seedless Kishu)         | 2  | <i>C. kinokuni</i> hort. ex Tanaka                             | 117399       |
| A067                    | *   | Kishu                | Nan feng mi ju                        | 2  | <i>C. kinokuni</i> hort. ex Tanaka                             | 117731       |
| A068                    | *   | Kishu                | Ozaki Komikan                         | 1  | <i>C. kinokuni</i> hort. ex Tanaka                             | 203329       |
| A069                    | *   | Kishu                | Sakurajima Komikan Matsuura           | 1  | <i>C. kinokuni</i> hort. ex Tanaka                             | 117459       |
| A070                    | *   | Kishu                | Sakurajima Komikan senbatsu 1gou      | 1  | <i>C. kinokuni</i> hort. ex Tanaka                             | 117460       |
| A071                    | *   | Kishu                | Sakurajima Komikan Shirahama          | 1  | <i>C. kinokuni</i> hort. ex Tanaka                             | 117461       |
| A072                    | *   | Kishu                | Taka Mkan                             | 1  | <i>C. kinokuni</i> hort. ex Tanaka                             | (113181)     |
| A073                    | *   | Kizu                 | (Stock strain)                        | 1  | <i>C. kizu</i> hort. ex Yu.Tanaka                              | 181849       |
| A074                    | *   | Kobayashi mikan      | (Stock strain)                        | 1  | <i>C. spp</i>                                                  | NA           |
| A075                    | *   | Kobeni mikan         | (Stock strain)                        | 2  | <i>C. erythrosa</i> hort. ex Tanaka                            | 117397       |
| A076                    | *   | Koji                 | (Stock strain)                        | 1  | <i>C. leiocarpa</i> hort. ex Tanaka                            | 113156       |
| A077                    | *   | Komikan 2009-130     | (Stock strain)                        | 1  | <i>C. spp</i>                                                  | NA           |
| A078                    | *   | Konejime             | (Stock strain)                        | 1  | <i>C. junos</i> (hybrid)                                       | 170627       |
| A079                    | *   | Kourai Tachibana     | (Stock strain)                        | 2  | <i>C. nipkokoreana</i> Tanaka                                  | 171493       |
| A080                    | *   | Kotokan              | (Stock strain)                        | 1  | <i>C. kotokan</i> Hayata                                       | 113342       |
| A081                    | *   | Kunenbo              | (Stock strain)                        | 3  | <i>C. nobilis</i> Lour. var. kunep Tanaka                      | 117387       |
| A082                    | *   | Kunenbo              | Kagoshima 0007                        | 1  | <i>C. nobilis</i> Lour. var. kunep Tanaka                      | NA           |
| A083                    | *   | Kunenbo              | Kagoshima 0027                        | 1  | <i>C. nobilis</i> Lour. var. kunep Tanaka                      | NA           |
| A084                    | *   | Kunenbo              | Kunenbo Kamikoshikijima               | 1  | <i>C. nobilis</i> Lour. var. kunep Tanaka                      | 117950       |
| A085                    | *   | Lemon                | Lisbon                                | 2  | <i>C. limon</i> (L.) Burm. f.                                  | 117289       |
| A086                    | *   | Lemonade             | (Stock strain)                        | 1  | <i>C. spp</i>                                                  | 117481       |
| A087                    | *   | Limonia              | (Stock strain)                        | 1  | <i>C. limonia</i> (L.) Osbeck                                  | 113240       |
| A088                    | *   | Mato buntan          | (Stock strain)                        | 1  | <i>C. maxima</i> Merr.                                         | 117283       |
| A089                    | *   | Mexican lime         | (Stock strain)                        | 2  | <i>C. aurantifolia</i> (Christm.) Swingle                      | 113215       |
| A090                    | *   | Meyer lemon          | (Stock strain)                        | 1  | <i>C. meyerii</i> Yu.Tanaka                                    | 113237       |
| A091                    | *   | Mochiyu              | (Stock strain)                        | 1  | <i>C. inflata</i> hort. ex Tanaka                              | 117379       |
| A092                    | *   | Murcott              | (Stock strain)                        | 1  | <i>C. spp</i>                                                  | 113374       |
| A093                    | *   | Myrtle leaf orange   | Chinott                               | 1  | <i>C. myrtifolia</i> Raf.                                      | 113378       |
| A094                    | *   | Nansho daidai        | (Stock strain)                        | 1  | <i>C. taiwanica</i> Tanaka et Shimada                          | 117363       |
| A095                    | *   | Naruto               | (Stock strain)                        | 2  | <i>C. medioglobosa</i> hort. ex Tanaka                         | 117293       |
| A096                    | *   | Natsudaidai          | (Stock strain)                        | 1  | <i>C. natsudaidai</i> Hayata                                   | (117296)     |
| A097                    | *   | Natsudaidai          | Beniamanatsu                          | 1  | <i>C. natsudaidai</i> Hayata                                   | 113504       |
| A098                    | *   | Natsudaidai          | Kawano Natsudaidai                    | 2  | <i>C. natsudaidai</i> Hayata                                   | 117297       |
| A099                    | *   | Natsudaidai          | Tachibana orange                      | 1  | <i>C. natsudaidai</i> Hayata                                   | 113208       |
| A100                    | *   | Nidonari mikan       | (Stock strain)                        | 1  | <i>C. spp</i>                                                  | 113362       |
| A101                    | *   | Oogonkan             | (Stock strain)                        | 1  | <i>C. spp</i>                                                  | 172148       |
| A102                    | *   | Ootachibana          | (Stock strain)                        | 1  | <i>C. otachibana</i> hort. ex Yu.Tanaka                        | 117362       |
| A103                    | *   | Otoutkan             | (Stock strain)                        | 1  | <i>C. sinomaxima</i> hort. ex Tanaka                           | 113332       |

|      |   |                      |                            |   |                                                                      |        |
|------|---|----------------------|----------------------------|---|----------------------------------------------------------------------|--------|
| A104 | * | Oukan                | (Stock strain)             | 2 | <i>C. suavissima</i> hort. ex Tanaka                                 | 117394 |
| A105 |   | Ponkan               | Ihara ponkan               | 1 | <i>C. reticulata</i> Blanco                                          | 172349 |
| A106 |   | Ponkan               | Morita ponkan              | 1 | <i>C. reticulata</i> Blanco                                          | 168862 |
| A107 | * | Ponkan               | Oota ponkan                | 2 | <i>C. reticulata</i> Blanco                                          | 171505 |
| A108 |   | Ponkan               | Yoshida ponkan             | 1 | <i>C. reticulata</i> Blanco                                          | 113178 |
| A109 | * | Ponkitsu             | (Stock strain)             | 2 | <i>C. ponki</i> hort. ex Tanaka                                      | 113171 |
| A110 | * | Pummelo whiteteye    | (Stock strain)             | 1 | <i>C. maxima</i> Merr.                                               | 113251 |
| A111 | * | Rokugatsumikan       | (Stock strain)             | 1 | <i>C. rokugatsu</i> hort. ex Yu.Tanaka                               | 113387 |
| A112 | * | Sanbokan             | (Stock strain)             | 1 | <i>C. sulcata</i> hort. ex I.Takah.                                  | 117315 |
| A113 |   | Satsuma              | Aoshima unshu              | 2 | <i>C. unshiu</i> Marcov.                                             | 117320 |
| A114 |   | Satsuma              | Dobashi beni               | 1 | <i>C. unshiu</i> Marcov.                                             | 117325 |
| A115 |   | Satsuma              | Haraguchi wase             | 1 | <i>C. unshiu</i> Marcov.                                             | 170625 |
| A116 |   | Satsuma              | Imamura unshu              | 1 | <i>C. unshiu</i> Marcov.                                             | 117339 |
| A117 |   | Satsuma              | Iwasaki wase               | 1 | <i>C. unshiu</i> Marcov.                                             | 115489 |
| A118 |   | Satsuma              | Juman unshu                | 1 | <i>C. unshiu</i> Marcov.                                             | 117337 |
| A119 |   | Satsuma              | Jutaro unshu NC            | 1 | <i>C. unshiu</i> Marcov.                                             | NA     |
| A120 |   | Satsuma              | Kinokuni unshu             | 1 | <i>C. unshiu</i> Marcov.                                             | 115749 |
| A121 |   | Satsuma              | Kuno unshu                 | 1 | <i>C. unshiu</i> Marcov.                                             | 170633 |
| A122 |   | Satsuma              | Miyagawa wase              | 2 | <i>C. unshiu</i> Marcov.                                             | 117351 |
| A123 |   | Satsuma              | Nagahashi unshu NC         | 2 | <i>C. unshiu</i> Marcov.                                             | NA     |
| A124 |   | Satsuma              | Niu unshu                  | 2 | <i>C. unshiu</i> Marcov.                                             | 113499 |
| A125 | * | Satsuma              | Okitsu wase (NC)           | 2 | <i>C. unshiu</i> Marcov.                                             | 170630 |
| A126 |   | Satsuma              | Original tree              | 5 | <i>C. unshiu</i> Marcov.                                             | 168849 |
| A127 |   | Satsuma              | Otsu-4 (NC)                | 2 | <i>C. unshiu</i> Marcov.                                             | 117319 |
| A128 |   | Satsuma              | Shirakawa unshu            | 1 | <i>C. unshiu</i> Marcov.                                             | 117452 |
| A129 |   | Satsuma              | Sugiyama unshu             | 1 | <i>C. unshiu</i> Marcov.                                             | 117516 |
| A130 |   | Satsuma              | Suruga beni                | 1 | <i>C. unshiu</i> Marcov.                                             | 113153 |
| A131 |   | Satsuma              | Ueno wase                  | 2 | <i>C. unshiu</i> Marcov.                                             | 168844 |
| A132 |   | Satsuma              | Yamada unshu NC            | 2 | <i>C. unshiu</i> Marcov.                                             | NA     |
| A133 |   | Satsuma              | Yamashita beni             | 1 | <i>C. unshiu</i> Marcov.                                             | 113125 |
| A134 | * | Satsuma Kikoku       | (Stock strain)             | 1 | <i>C. spp</i>                                                        | 117498 |
| A135 | * | Shiikuwasha          | (Stock strain)             | 2 | <i>C. depressa</i> Hayata                                            | 117406 |
| A136 | * | Shiikuwasha          | Oogimi Kuganii             | 1 | <i>C. depressa</i> Hayata                                            | 117514 |
| A137 | * | Shunkokan            | (Stock strain)             | 1 | <i>C. shunkokan</i> hort. ex Tanaka                                  | 117377 |
| A138 | * | Sokitsu              | (Stock strain)             | 3 | <i>C. kinokuni</i> hort. ex Tanaka var. subcompressa hort. ex Tanaka | 117400 |
| A139 |   | Sour orange          | Bouquet de Fleurs          | 1 | <i>C. aurantium</i> L. var. <i>crispa</i> Yu.Tanaka                  | 117370 |
| A140 |   | Sour orange          | Chaozhouchen               | 1 | <i>C. aurantium</i> L.                                               | 117367 |
| A141 | * | Sour orange          | Daidai                     | 2 | <i>C. aurantium</i> L.                                               | 117365 |
| A142 |   | Sour orange          | Kaiseito                   | 1 | <i>C. aurantium</i> L.                                               | 117369 |
| A143 |   | Sour orange          | Za daidai                  | 1 | <i>C. aurantium</i> L.                                               | NA     |
| A144 | * | Sudachi              | (Stock strain)             | 2 | <i>C. sudachi</i> hort. ex Shirai                                    | 117383 |
| A145 | * | Suisho buntan        | (Stock strain)             | 1 | <i>C. maxima</i> Merr.                                               | 117279 |
| A146 | * | Sunki                | (Stock strain)             | 2 | <i>C. sunki</i> (Hayata) hort. ex Tanaka                             | 117403 |
| A147 | * | Suruga Yuku          | (Stock strain)             | 1 | <i>C. leiocarpa</i> hort. ex Tanaka forma monoembryota Tanaka        | 113164 |
| A148 |   | Sweet orange         | Cadenera                   | 1 | <i>C. sinensis</i> (L.) Osbeck                                       | 117526 |
| A149 |   | Sweet orange         | Cara Cara                  | 1 | <i>C. sinensis</i> (L.) Osbeck                                       | 118404 |
| A150 |   | Sweet orange         | Crescent                   | 1 | <i>C. sinensis</i> (L.) Osbeck                                       | 117529 |
| A151 |   | Sweet orange         | Hamlin                     | 1 | <i>C. sinensis</i> (L.) Osbeck                                       | 117307 |
| A152 |   | Sweet orange         | Jin Cheng                  | 1 | <i>C. sinensis</i> (L.) Osbeck                                       | 117912 |
| A153 |   | Sweet orange         | Joppa                      | 1 | <i>C. sinensis</i> (L.) Osbeck                                       | 113273 |
| A154 |   | Sweet orange         | Mediterranean Sweet Orange | 1 | <i>C. sinensis</i> (L.) Osbeck                                       | 113288 |
| A155 |   | Sweet orange         | Moro NC                    | 2 | <i>C. sinensis</i> (L.) Osbeck                                       | 113291 |
| A156 |   | Sweet orange         | Parson Brown               | 1 | <i>C. sinensis</i> (L.) Osbeck                                       | 117306 |
| A157 |   | Sweet orange         | Pineapple                  | 2 | <i>C. sinensis</i> (L.) Osbeck                                       | 117517 |
| A158 |   | Sweet orange         | Santa Catarina             | 1 | <i>C. sinensis</i> (L.) Osbeck                                       | 113270 |
| A159 |   | Sweet orange         | Seike navel                | 1 | <i>C. sinensis</i> (L.) Osbeck                                       | 117312 |
| A160 |   | Sweet orange         | Shamouti                   | 1 | <i>C. sinensis</i> (L.) Osbeck                                       | 115510 |
| A161 |   | Sweet orange         | Tong Zi Gan                | 1 | <i>C. sinensis</i> (L.) Osbeck                                       | 117522 |
| A162 | * | Sweet orange         | Trovita                    | 1 | <i>C. sinensis</i> (L.) Osbeck                                       | 172154 |
| A163 |   | Sweet orange         | Washington navel           | 1 | <i>C. sinensis</i> (L.) Osbeck                                       | 115511 |
| A164 |   | Sweet orange         | Valencia                   | 1 | <i>C. sinensis</i> (L.) Osbeck                                       | 117303 |
| A165 |   | Sweet orange         | Wu Yue Cheng               | 1 | <i>C. sinensis</i> (L.) Osbeck                                       | 117914 |
| A166 |   | Sweet orange         | Xue Gan                    | 1 | <i>C. sinensis</i> (L.) Osbeck                                       | 117521 |
| A167 |   | Sweet orange         | Yinzi Gan                  | 1 | <i>C. sinensis</i> (L.) Osbeck                                       | 117302 |
| A168 | * | Tachibana            | (Stock strain)             | 2 | <i>C. tachibana</i> (Makino) Tanaka                                  | 117405 |
| A169 |   | Tachibana            | Anettaishijou              | 1 | <i>C. tachibana</i> (Makino) Tanaka                                  | 117883 |
| A170 |   | Tachibana            | Botanical garden           | 1 | <i>C. tachibana</i> (Makino) Tanaka                                  | 117884 |
| A171 |   | Tachibana            | Hananowaya                 | 1 | <i>C. tachibana</i> (Makino) Tanaka                                  | 168874 |
| A172 |   | Tachibana            | Heda 1                     | 1 | <i>C. tachibana</i> (Makino) Tanaka                                  | 168872 |
| A173 |   | Tachibana            | Heda 2                     | 1 | <i>C. tachibana</i> (Makino) Tanaka                                  | 168873 |
| A174 | * | Tachibana            | Ishinami Minka             | 1 | <i>C. tachibana</i> (Makino) Tanaka                                  | 117882 |
| A175 | * | Tachibana            | Ishinami No.1              | 1 | <i>C. tachibana</i> (Makino) Tanaka                                  | 117880 |
| A176 |   | Tachibana            | Ishinami No.2              | 1 | <i>C. tachibana</i> (Makino) Tanaka                                  | 117881 |
| A177 |   | Tachibana            | Oodomari OP-2              | 1 | <i>C. tachibana</i> (Makino) Tanaka                                  | 115536 |
| A178 |   | Tachibana            | Okitsu                     | 1 | <i>C. tachibana</i> (Makino) Tanaka                                  | 168876 |
| A179 |   | Tachibana            | Reizanji                   | 1 | <i>C. tachibana</i> (Makino) Tanaka                                  | 168875 |
| A180 |   | Tajima mikan         | (Stock strain)             | 1 | <i>C. tachibana</i> (Makino) Tanaka                                  | 113359 |
| A181 |   | Takumanatsukunenbo   | (Stock strain)             | 1 | <i>C. spp</i>                                                        | 113355 |
| A182 |   | Tankan               | (Stock strain)             | 1 | <i>C. tankan</i> Hayata                                              | 171489 |
| A183 | * | Tankan               | Taishun                    | 1 | <i>C. tankan</i> Hayata                                              | 115492 |
| A184 |   | Tankan               | Tarumizu 1                 | 1 | <i>C. tankan</i> Hayata                                              | 113508 |
| A185 |   | Tankan               | T-132                      | 1 | <i>C. tankan</i> Hayata                                              | 113507 |
| A186 | * | Temple               | (Stock strain)             | 1 | <i>C. temple</i> hort. ex Yu.Tanaka                                  | 113357 |
| A187 | * | Tengu                | (Stock strain)             | 1 | <i>C. tengu</i> hort. ex Tanaka                                      | 117360 |
| A188 | * | Tizon                | (Stock strain)             | 1 | <i>C. papillaris</i> Blanco                                          | 113354 |
| A189 |   | Toukan               | (Stock strain)             | 1 | <i>C. spp</i>                                                        | 113356 |
| A190 |   | Tookunin             | (Stock strain)             | 1 | <i>C. nobilis</i> Lour. var. <i>kunep</i> Tanaka                     | 204391 |
| A191 | * | Tosa buntan          | (Stock strain)             | 1 | <i>C. maxima</i> Merr.                                               | 117280 |
| A192 | * | Twukkuni             | (Stock strain)             | 1 | <i>C. nobilis</i> Lour. var. <i>kunep</i> Tanaka                     | 204376 |
| A193 |   | Twukkunin            | (Stock strain)             | 1 | <i>C. nobilis</i> Lour. var. <i>kunep</i> Tanaka                     | 204373 |
| A194 |   | Twukunihu            | (Stock strain)             | 1 | <i>C. nobilis</i> Lour. var. <i>kunep</i> Tanaka                     | 204407 |
| A195 |   | Twuukuribu           | (Stock strain)             | 1 | <i>C. nobilis</i> Lour. var. <i>kunep</i> Tanaka                     | 204397 |
| A196 | * | Uchimurasaki         | (Stock strain)             | 1 | <i>C. maxima</i> Merr.                                               | 116973 |
| A197 | * | Ujukitsu             | (Stock strain)             | 1 | <i>C. ujukitsu</i> hort. ex Tanaka                                   | 115519 |
| A198 | * | Unzoki               | (Stock strain)             | 1 | <i>C. spp</i>                                                        | 113330 |
| A199 | * | USSR Tangelo         | (Stock strain)             | 1 | <i>C. spp</i>                                                        | 113350 |
| A200 | * | Willowleaf mandarin  | Mediterranean mandarin     | 1 | <i>C. deliciosa</i> Ten.                                             | 117393 |
| A201 | * | Willowleaf mandarin  | Willowleaf mandarin        | 1 | <i>C. deliciosa</i> Ten.                                             | 117941 |
| A202 | * | Yamabuki             | (Stock strain)             | 1 | <i>C. yamabuki</i> hort. ex Yu.Tanaka                                | 117364 |
| A203 | * | Yamamikan            | (Stock strain)             | 4 | <i>C. intermedia</i> hort. ex Tanaka                                 | 117359 |
| A204 | * | Yatsushiro           | (Stock strain)             | 1 | <i>C. yatsushiro</i> hort. ex Tanaka                                 | 117388 |
| A205 | * | Yuge hyoukan         | (Stock strain)             | 3 | <i>C. yuge-hyokan</i> hort. ex Yu.Tanaka                             | 117507 |
| A206 | * | Youpi ju (Yuhikitsu) | (Stock strain)             | 1 | <i>C. oleocarpa</i> hort. ex Tanaka                                  | 117401 |
| A207 | * | Yuukunibu            | (Stock strain)             | 2 | <i>C. yanbaruensis</i> Tanaka                                        | 113383 |
| A208 | * | Yuzu                 | (Stock strain)             | 2 | <i>C. junos</i> Siebold ex Tanaka                                    | 117380 |

## B: hybrid varieties

| ID   | Rep | Variety name        | Seed parent                      | Pollen parent                  | RA | Accession ID | Breeder <sup>+)1</sup> |
|------|-----|---------------------|----------------------------------|--------------------------------|----|--------------|------------------------|
| B001 | *   | 'Akemi'             | 'Kiyomi'                         | 'Seminole'                     | 1  | NA           | 1                      |
| B002 | *   | 'Aki Marine'        | 'Kiyomi'                         | 'Southern red'                 | 1  | NA           | 2                      |
| B003 | *   | 'Aki Tangor'        | Satsuma mandarin                 | Sweet orange                   | 1  | NA           | 2                      |
| B004 | *   | 'Allspice'          | 'Imperial' grapefruit            | Willowleaf mandarin            | 1  | 115522       | 3                      |
| B005 | *   | 'Amaka'             | 'Kiyomi'                         | 'Encore'                       | 1  | NA           | 1                      |
| B006 | *   | 'Ariake'            | Sweet orange                     | Clementine                     | 1  | NA           | 1                      |
| B007 | *   | 'Asumi'             | 'Okitsu-46'                      | 'Harumi'                       | 2  | NA           | 1                      |
| B008 | *   | 'Aurastar'          | 'H-FD-1'                         | Banpeiyu                       | 1  | NA           | 1                      |
| B009 | *   | 'Awa Orange'        | Hyuganatsu                       | Sweet orange                   | 1  | 115757       | 4                      |
| B010 | *   | 'Benibae'           | 'HF9'                            | 'Encore'                       | 1  | NA           | 1                      |
| B011 | *   | 'Benimadoka'        | Mato buntan                      | Hirado buntan                  | 1  | NA           | 1                      |
| B012 | *   | 'Chandler pummelo'  | <i>Siamese Pink pummelo</i>      | <i>Siamese Sweet pummelo</i>   | 1  | 113449       | 3                      |
| B013 | *   | 'Ehimekashi 28'     | 'Nankou'                         | 'Amakusa'                      | 1  | NA           | 5                      |
| B014 | *   | 'Encore'            | King mandarin                    | Willowleaf mandarin            | 1  | 117421       | 3                      |
| B015 | *   | 'Fairchild'         | Clementine                       | 'Orland'                       | 1  | 113367       | 6                      |
| B016 | *   | 'Fortune'           | Clementine                       | Dancy tangerine                | 1  | 115495       | 6                      |
| B017 | *   | 'Harehime'          | 'E-647'                          | Satsuma mandarin               | 1  | NA           | 1                      |
| B018 | *   | 'Hareyaka'          | 'Encore'                         | Ponkan                         | 1  | NA           | 1                      |
| B019 | *   | 'Haruhi'            | 'Okitsu-46'                      | 'Awa Orange'                   | 2  | NA           | 1                      |
| B020 | *   | 'Haruka'            | Hyuganatsu                       | Natsudaidai                    | 1  | NA           | 7                      |
| B021 | *   | 'Harumi'            | 'Kiyomi'                         | Ponkan                         | 1  | NA           | 1                      |
| B022 | *   | 'Hayaka'            | Satsuma mandarin                 | Ponkan                         | 1  | NA           | 1                      |
| B023 | *   | 'Hayasaki'          | Mato buntan                      | Hirado buntan                  | 1  | NA           | 1                      |
| B024 | *   | 'Himekoharu'        | 'Kiyomi'                         | Oogonkan                       | 1  | NA           | 5                      |
| B025 | *   | 'Hiroshimakaken 11' | 'Kiyomi'                         | 'Southern red'                 | 1  | NA           | 2                      |
| B026 | *   | 'Honey'             | King mandarin                    | Willowleaf mandarin            | 1  | 117930       | 3                      |
| B027 | *   | 'Kanpei'            | 'Nishinokaori'                   | Ponkan                         | 1  | NA           | 5                      |
| B028 | *   | 'Kara'              | Satsuma mandarin                 | King mandarin                  | 2  | 117422       | 3                      |
| B029 | *   | 'Kincy mandarin'    | King mandarin                    | Dancy tangerine                | 1  | 117423       | 3                      |
| B030 | *   | 'Kinnow mandarin'   | King mandarin                    | Willowleaf mandarin            | 1  | 113458       | 3                      |
| B031 | *   | 'Kiyomi'            | Satsuma mandarin                 | Sweet orange                   | 1  | NA           | 1                      |
| B032 | *   | 'Kuchinotsu-41'     | (Autotetraploid of Hyuganatsu)   |                                | 1  | NA           | 1                      |
| B033 | *   | 'Lee'               | Clementine                       | 'Orland'                       | 1  | 113385       | 6                      |
| B034 | *   | 'May Pomelo'        | Hassaku                          | Hirado buntan                  | 1  | NA           | 1                      |
| B035 | *   | 'Mihaya'            | 'Tsunonozomi'                    | 'No.1408'                      | 1  | NA           | 1                      |
| B036 | *   | 'Mihocore'          | Satsuma mandarin                 | 'Encore'                       | 1  | NA           | 1                      |
| B037 | *   | 'Mineola'           | 'Duncan' grapefruit              | Dancy tangerine                | 1  | 113377       | 6                      |
| B038 | *   | 'Nankou'            | Satsuma mandarin                 | Clementine                     | 1  | NA           | 1                      |
| B039 | *   | 'Nishinokaori'      | 'Kiyomi'                         | Sweet orange                   | 1  | NA           | 1                      |
| B040 | *   | 'Nou 5 gou'         | 'Lee'                            | Kishu mandarin                 | 1  | NA           | 1                      |
| B041 | *   | 'Nou 6 gou'         | King mandarin                    | Kishu mandarin                 | 1  | NA           | 1                      |
| B042 | *   | 'Nou 7 gou'         | 'H-FD-1'                         | Banpeiyu                       | 1  | NA           | 1                      |
| B043 | *   | 'Nova'              | Clementine                       | 'Orland'                       | 1  | 113360       | 6                      |
| B044 | *   | 'Ooitakaken-4'      | Satsuma mandarin                 | 'Amakusa'                      | 1  | NA           | 8                      |
| B045 | *   | 'Orland'            | 'Duncan' grapefruit              | Dancy tangerine                | 1  | 113327       | 6                      |
| B046 | *   | 'Orobianco'         | <i>Acid less pummelo</i>         | <i>Grapefruit (Tetraploid)</i> | 1  | NA           | 3                      |
| B047 | *   | 'Osceola'           | Clementine                       | 'Orland'                       | 1  | 113329       | 6                      |
| B048 | *   | 'Page'              | 'Mineola'                        | Clementine                     | 1  | 113370       | 6                      |
| B049 | *   | 'Pearl'             | 'Imperial' grapefruit            | Willowleaf mandarin            | 1  | 113364       | 3                      |
| B050 | *   | 'Pixie mandarin'    | Kincy mandarin                   | (unknown; open pollination)    | 1  | 113366       | 3                      |
| B051 | *   | 'Robinson'          | Clementine                       | 'Orland'                       | 1  | 113386       | 6                      |
| B052 | *   | 'Saga Mandarin'     | Satsuma mandarin                 | 'Fairchild'                    | 1  | 115755       | 9                      |
| B053 | *   | 'Sagakashi 34'      | (Nucellar seedling of Shiranuhi) |                                | 1  | NA           | 9                      |
| B054 | *   | 'Seihou'            | 'Kiyomi'                         | 'Mineola'                      | 1  | NA           | 1                      |
| B055 | *   | 'Seinannohikari'    | 'KyOw21'                         | 'Youkou'                       | 1  | NA           | 1                      |
| B056 | *   | 'Seminole'          | Grapefruit                       | Dancy tangerine                | 1  | 113348       | 6                      |
| B057 | *   | 'Setomi'            | 'Kiyomi'                         | Ponkan                         | 1  | 223670       | 10                     |
| B058 | *   | 'Shiranuhi'         | 'Kiyomi'                         | Ponkan                         | 1  | NA           | 1                      |
| B059 | *   | 'Southern Yellow'   | 'Tanikawa Buntan'                | Kishu mandarin                 | 1  | NA           | 1                      |
| B060 | *   | 'Summer Fresh'      | Hassaku                          | Natsudaidai                    | 1  | NA           | 1                      |
| B061 | *   | 'Sweet spring'      | Satsuma mandarin                 | Hassaku                        | 1  | NA           | 1                      |
| B062 | *   | 'Tamami'            | 'Kiyomi'                         | 'Willking'                     | 1  | NA           | 1                      |
| B063 | *   | 'Tanikawa Buntan'   | Mato buntan?                     | Sanbokan?                      | 2  | 117433       | 1                      |
| B064 | *   | 'Tsunokagayaki'     | 'KyOw14'                         | 'Encore'                       | 1  | NA           | 1                      |
| B065 | *   | 'Tsunokaori'        | 'Kiyomi'                         | Satsuma mandarin               | 2  | NA           | 1                      |
| B066 | *   | 'Tsunonozomi'       | 'Kiyomi'                         | 'Encore'                       | 1  | NA           | 1                      |
| B067 | *   | 'Willking'          | King mandarin                    | Willowleaf mandarin            | 1  | 117425       | 3                      |
| B068 | *   | 'Yellow Pummelo'    | Hassaku                          | Hirado buntan                  | 1  | NA           | 1                      |
| B069 | *   | 'Youkou'            | 'Kiyomi'                         | Ponkan                         | 1  | NA           | 1                      |
| B070 | *   | 'E-647'             | 'Kiyomi'                         | 'Osceola'                      | 1  | NA           | 1                      |
| B071 | *   | 'EnOw21'            | 'Encore'                         | Satsuma mandarin               | 1  | NA           | 1                      |
| B072 | *   | 'H-FD-1'            | Hassaku                          | <i>Trifoliolate orange</i>     | 1  | NA           | 1                      |
| B073 | *   | 'HF9'               | Satsuma mandarin                 | Sweet orange                   | 1  | NA           | 1                      |
| B074 | *   | 'KyOw14'            | 'Kiyomi'                         | Satsuma mandarin               | 1  | NA           | 1                      |
| B075 | *   | 'KyOw21'            | 'Kiyomi'                         | Satsuma mandarin               | 1  | NA           | 1                      |
| B076 | *   | 'No.1408'           | 'EnOw21'                         | <i>No.2681</i>                 | 1  | NA           | 1                      |
| B077 | *   | 'Okitsu-46'         | 'Sweet spring'                   | Sweet orange                   | 1  | NA           | 1                      |
| B078 | *   | 'Okitsu-56'         | 'Okitsu-45'                      | 'Nou 5 gou'                    | 1  | NA           | 1                      |

*Italic: not evaluated in this study.*

+) Breeders: 1 NARO, 2 Hiroshima Prefectural Agricultural Station, 3 UC Riverside, 4 Tokushima Prefectural Fruit Tree Station, 5 Ehime Research Institute of Agriculture, Forestry, and Fisheries Fruit Tree Research Center, 6 USDA, 7 Mr. Ishii Tokuo, 8 Oita Prefectural Fruit Tree Station, 9 Saga Prefectural Fruit Tree Station, 10 Yamaguchi Prefectural Fruit Tree Station

## C: selected strains

| ID   | Rep | Line name | Seed parent      | Pollen parent    | RA | Accession ID | Breeder <sup>+)1</sup> |
|------|-----|-----------|------------------|------------------|----|--------------|------------------------|
| C001 | *   | Strain 01 | 'Tsunonozomi'    | U                | 1  | NA           | 1                      |
| C002 | *   | Strain 02 | 'Harehime'       | Clementine       | 1  | NA           | 1                      |
| C003 | *   | Strain 03 | 'Harehime'       | 'Seinannohikari' | 1  | NA           | 1                      |
| C004 | *   | Strain 04 | U                | U                | 1  | NA           | 1                      |
| C005 | *   | Strain 05 | U                | U                | 1  | NA           | 1                      |
| C006 | *   | Strain 06 | 'Sweet spring'   | Sweet orange     | 1  | NA           | 1                      |
| C007 | *   | Strain 07 | Andoukan         | Hassaku          | 1  | NA           | 1                      |
| C008 | *   | Strain 08 | 'Kiyomi'         | U                | 1  | NA           | 1                      |
| C009 | *   | Strain 09 | 'Kiyomi'         | Sweet orange     | 1  | NA           | 1                      |
| C010 | *   | Strain 10 | 'Kiyomi'         | 'Willking'       | 1  | NA           | 1                      |
| C011 | *   | Strain 11 | 'Kiyomi'         | 'Willking'       | 2  | NA           | 1                      |
| C012 | *   | Strain 12 | 'Kiyomi'         | Line63           | 1  | NA           | 1                      |
| C013 | *   | Strain 13 | Satsuma mandarin | Hyuganatsu       | 1  | NA           | 1                      |
| C014 | *   | Strain 14 | 'Kiyomi'         | 'E-647'          | 1  | NA           | 1                      |
| C015 | *   | Strain 15 | U                | Satsuma mandarin | 1  | NA           | 1                      |
| C016 | *   | Strain 16 | Mato buntan      | Hirado buntan    | 1  | NA           | 1                      |
| C017 | *   | Strain 17 | Satsuma mandarin | Murcott          | 1  | NA           | 1                      |

|      |   |           |                  |                   |   |    |   |
|------|---|-----------|------------------|-------------------|---|----|---|
| C018 | * | Strain 18 | Satsuma mandarin | Clementine        | 1 | NA | 1 |
| C019 | * | Strain 19 | 'KyOw21'         | 'Encore'          | 1 | NA | 1 |
| C020 | * | Strain 20 | 'Encore'         | Ponkan            | 1 | NA | 1 |
| C021 | * | Strain 21 | U                | 'Encore'          | 1 | NA | 1 |
| C022 | * | Strain 22 | 'EnOw21'         | 'Youkou'          | 1 | NA | 1 |
| C023 | * | Strain 23 | 'KyOw21'         | Dancy             | 1 | NA | 1 |
| C024 | * | Strain 24 | 'KyOw21'         | King mandarin     | 1 | NA | 1 |
| C025 | * | Strain 25 | Line41           | Murcott           | 1 | NA | 1 |
| C026 | * | Strain 26 | 'KyOw21'         | U                 | 1 | NA | 1 |
| C027 | * | Strain 27 | 'KyOw14'         | 'Encore'          | 1 | NA | 1 |
| C028 | * | Strain 28 | 'KyOw21'         | 'Encore'          | 1 | NA | 1 |
| C029 | * | Strain 29 | U                | Murcott           | 1 | NA | 1 |
| C030 | * | Strain 30 | 'KyOw21'         | 'Robinson'        | 1 | NA | 1 |
| C031 | * | Strain 31 | 'Encore'         | Satsuma mandarin  | 1 | NA | 1 |
| C032 | * | Strain 32 | 'KyOw21'         | U                 | 1 | NA | 1 |
| C033 | * | Strain 33 | U                | Line22            | 1 | NA | 1 |
| C034 | * | Strain 34 | 'Sweet spring'   | 'Ariake'          | 1 | NA | 1 |
| C035 | * | Strain 35 | U                | U                 | 1 | NA | 1 |
| C036 | * | Strain 36 | U                | 'Ariake'          | 1 | NA | 1 |
| C037 | * | Strain 37 | Line30           | U                 | 1 | NA | 1 |
| C038 | * | Strain 38 | U                | Line22            | 1 | NA | 1 |
| C039 | * | Strain 39 | 'Tsunokagayaki'  | 'Ariake'          | 1 | NA | 1 |
| C040 | * | Strain 40 | 'Kiyomi'         | 'Encore'          | 2 | NA | 1 |
| C041 | * | Strain 41 | 'Kiyomi'         | 'Encore'          | 1 | NA | 1 |
| C042 | * | Strain 42 | 'KyOw21'         | 'Ariake'          | 1 | NA | 1 |
| C043 | * | Strain 43 | 'KyOw21'         | Dancy             | 1 | NA | 1 |
| C044 | * | Strain 44 | 'Lee'            | Satsuma mandarin  | 1 | NA | 1 |
| C045 | * | Strain 45 | 'Kiyomi'         | 'Robinson'        | 1 | NA | 1 |
| C046 | * | Strain 46 | 'Nishinokaori'   | Iyo               | 1 | NA | 1 |
| C047 | * | Strain 47 | 'Nankou'         | Line46            | 1 | NA | 1 |
| C048 | * | Strain 48 | Satsuma mandarin | Sweet orange      | 1 | NA | 1 |
| C049 | * | Strain 49 | Satsuma mandarin | Clementine        | 1 | NA | 1 |
| C050 | * | Strain 50 | Satsuma mandarin | Clementine        | 1 | NA | 1 |
| C051 | * | Strain 51 | Hyuganatsu       | Sweet orange      | 1 | NA | 1 |
| C052 | * | Strain 52 | Hyuganatsu       | Sweet orange      | 1 | NA | 1 |
| C053 | * | Strain 53 | Hyuganatsu       | Sweet orange      | 1 | NA | 1 |
| C054 | * | Strain 54 | Hassaku          | Dancy             | 1 | NA | 1 |
| C055 | * | Strain 55 | U                | Clementine        | 1 | NA | 1 |
| C056 | * | Strain 56 | Sweet orange     | 'Sweet spring'    | 1 | NA | 1 |
| C057 | * | Strain 57 | 'Sweet spring'   | Hassaku           | 1 | NA | 1 |
| C058 | * | Strain 58 | Iyo              | U                 | 1 | NA | 1 |
| C059 | * | Strain 59 | 'Sweet spring'   | Hassaku           | 1 | NA | 1 |
| C060 | * | Strain 60 | Hassaku          | Dancy             | 1 | NA | 1 |
| C061 | * | Strain 61 | Hassaku          | Hirado buntan     | 1 | NA | 1 |
| C062 | * | Strain 62 | Hassaku          | Sweet orange      | 1 | NA | 1 |
| C063 | * | Strain 63 | 'Kiyomi'         | 'Willking'        | 1 | NA | 1 |
| C064 | * | Strain 64 | Satsuma mandarin | Sweet orange      | 1 | NA | 1 |
| C065 | * | Strain 65 | 'Kiyomi'         | 'Willking'        | 1 | NA | 1 |
| C066 | * | Strain 66 | 'Kiyomi'         | 'Willking'        | 1 | NA | 1 |
| C067 | * | Strain 67 | Line06           | Satsuma mandarin  | 1 | NA | 1 |
| C068 | * | Strain 68 | 'Kiyomi'         | 'Okitsu-46'       | 1 | NA | 1 |
| C069 | * | Strain 69 | 'Okitsu-46'      | 'Harumi'          | 1 | NA | 1 |
| C070 | * | Strain 70 | Line06           | Line10            | 1 | NA | 1 |
| C071 | * | Strain 71 | 'Okitsu-46'      | 'Harumi'          | 2 | NA | 1 |
| C072 | * | Strain 72 | 'Kiyomi'         | Pummelo whitetype | 1 | NA | 1 |
| C073 | * | Strain 73 | 'Harehime'       | 'Okitsu-56'       | 1 | NA | 1 |
| C074 | * | Strain 74 | 'E-647'          | Ponkan            | 1 | NA | 1 |
| C075 | * | Strain 75 | U                | U                 | 1 | NA | 1 |
| C076 | * | Strain 76 | U                | U                 | 1 | NA | 1 |
| C077 | * | Strain 77 | 'Harehime'       | 'Okitsu-56'       | 1 | NA | 1 |
| C078 | * | Strain 78 | 'Okitsu-46'      | 'Harumi'          | 1 | NA | 1 |
| C079 | * | Strain 79 | 'Kiyomi'         | U                 | 1 | NA | 1 |
| C080 | * | Strain 80 | 'Kiyomi'         | U                 | 1 | NA | 1 |
| C081 | * | Strain 81 | 'E-647'          | U                 | 1 | NA | 1 |
| C082 | * | Strain 82 | Satsuma mandarin | U                 | 1 | NA | 1 |
| C083 | * | Strain 83 | 'Harehime'       | 'Harumi'          | 1 | NA | 1 |
| C084 | * | Strain 84 | 'Harehime'       | 'Asumi'           | 1 | NA | 1 |
| C085 | * | Strain 85 | 'Kiyomi'         | 'Asumi'           | 1 | NA | 1 |

RA: Replicate of analysis; U: not used in this study.
