# Supplementary material for: Hybrid Origins of Citrus Varieties Inferred from DNA Marker Analysis of Nuclear and Organelle Genomes
Source: PubMed Central journal article supplement (PMC5130255; doi:10.1371/journal.pone.0166969), 2016-11-30
Supplement: pone.0166969.s005.pdf [file pone.0166969.s005.pdf]

Table S2. DNA markers used in this study

A. Genomic DNA markers developed in this study

| #  | Marker   | Cert. | Category | LG  | Accession ID  | SSR position | Source                          | Motif         | Tag   | Tagged forward primer                   | F Tm  | tail    | Tailed reverse primer           | R Tm  | Amp | Program |
|----|----------|-------|----------|-----|---------------|--------------|---------------------------------|---------------|-------|-----------------------------------------|-------|---------|---------------------------------|-------|-----|---------|
| 1  | CTVR01   | *     | gSSR     | LG7 | AF506028      | 274544       | Genomic sequence                | (ctg)n        | F9GAC | ctagatcaggagcagTAGAGTCCGACAGTGGTTC      | 58.91 | gtttctt | gtttcttCAAACACTGTAATCAATGCAGC   | 59.30 | 305 | 56/32   |
| 2  | CTVR04   | **    | gSSR     | LG7 | AF506028      | 274557       | Genomic sequence                | (tgtcgt)n     | F9GCC | ctagatcaggagcagTAGAGTCCGACAGTGGTTC      | 58.91 | gtttctt | gtttcttCAAACACTGTAATCAATGCAGC   | 59.30 | 305 | 56/32   |
| 3  | CUBER403 | *     | gSSR     | L05 | GA975130      | 98           | Citrus unshiu BAC end sequences | (taat)n       | F9GTC | ctagatcaggagcagcTAACTTTCTTCTTCAATGGG    | 57.02 | gtttctt | gtttcttTAATCTTCGTCGTAATGTGAC    | 56.49 | 251 | 58/32   |
| 4  | CUBER410 | *     | gSSR     | L05 | GA977509      | 312          | Citrus unshiu BAC end sequences | (aaac)n       | F9TAC | ctagatcaggagcagcCAACCAACAGCTTTATCAATC   | 56.16 | gtttctt | gtttcttTGTTTGGTTTACTGCTTGG      | 56.4  | 258 | 54/32   |
| 5  | CUBER601 | *     | gSSR     | L02 | GA975859      | 111          | Citrus unshiu BAC end sequences | (tgtaa)n      | F9GTC | ctagatcaggagcagcCAATGACTGTGATAATGGTGC   | 57.27 | gtttctt | gtttcttCTAGGAAAGTTTGTCTTCT      | 57.04 | 164 | 56/32   |
| 6  | CUBER602 | **    | gSSR     | L01 | GA976278      | 99           | Citrus unshiu BAC end sequences | (ttcctc)n     | F9TAC | ctagatcaggagcagcGCCATTTCTTTCTTCTTCTC    | 56.73 | gtttctt | gtttcttGACTGAAAGTCTTCAAAATC     | 56.87 | 232 | 54/34   |
| 7  | CUBER903 | *     | gSSR     | L07 | GA976453      | 774          | Citrus unshiu BAC end sequences | (ata)n        | F9GCC | ctagatcaggagcagcCACTGCACAAATCATAAGTAG   | 58.03 | gttt    | gttttGAAGATAATGAGAGCCAAATC      | 57.43 | 175 | 56/32   |
| 8  | CUBER918 | *     | gSSR     | L09 | GA974879      | 627          | Citrus unshiu BAC end sequences | (tcc)n        | F9GTC | ctagatcaggagcagcCAGGCTGTGTTCCTCAATG     | 62.34 | gttt    | gttttGGATACCCCGCAGTTT           | 62.38 | 101 | 56/32   |
| 9  | CUBER920 | *     | gSSR     | L04 | GA977190      | 719          | Citrus unshiu BAC end sequences | (atg)n        | F9GTC | ctagatcaggagcagcCAATGACTGTGATAATGGTGC   | 59.06 | gttt    | gttttGGACTATCCCTTCAATG          | 58.87 | 164 | 56/32   |
| 10 | CUBER925 | *     | gSSR     | L05 | GA975321      | 635          | Citrus unshiu BAC end sequences | (atg)n        | F9GAC | ctagatcaggagcagcCAATGACTGTGATAATGGTGC   | 57.06 | gttt    | gttttAGGTAACTTACGCTTGTGAG       | 56.65 | 167 | 56/32   |
| 11 | CUBER935 | **    | gSSR     | L06 | GA976619      | 482          | Citrus unshiu BAC end sequences | (tga)n        | F9GAC | ctagatcaggagcagcTCTTGTGTTCTCAACATGAATA  | 59.61 | gt      | gtttTAGTTCCTCCCCCAATAT          | 58.93 | 178 | 58/32   |
| 12 | CUBER939 | *     | gSSR     | L01 | GA975313      | 822          | Citrus unshiu BAC end sequences | (tca)n        | F9GCC | ctagatcaggagcagcTAAAGTATGAAAGTTGACGCA   | 58.21 | gttt    | gttttGGCAGGAGTACTGTGATA         | 57.8  | 215 | 60/32   |
| 13 | CUBER951 | *     | gSSR     | L01 | GA976278      | 322          | Citrus unshiu BAC end sequences | (ttc)n        | F9AGG | ctagatcaggagcagcTTCCTCTTCCTTCCTCCTC     | 57.87 | gttt    | gtttTAGTATTCCTGACACTGATGA       | 57.74 | 161 | 56/32   |
| 14 | GRW2011  | *     | gSSR     | LG3 | Scaffold3     | 8602126      | Clementine v1.0                 | (TA)n(CT)n    | F9GTC | ctagatcaggagcagcTCAACTCAGCCCTTCCAGTTT   | 59.83 | gttt    | gttttCGTGATCTAAGTGGGAAGTAT      | 61.38 | 122 | 54/32   |
| 15 | GRW2015  | *     | gSSR     | LG3 | Scaffold3     | 43996493     | Clementine v1.0                 | (TA)n         | F9TAC | ctagatcaggagcagcATGTGACACAAAGAAATTTGTC  | 59.71 | gttt    | gttttATTCTTAATTAAGCTTAACAGGG    | 57.01 | 108 | 56/32   |
| 16 | GRW3021  | *     | gSSR     | L05 | BUZY1863.g1   | 426          | NCBI Trace Archive              | (TGT)n        | F9TAC | CTAGTACAGGACTACATCCCGCCTCTCTTTCT        | 61.75 | gttt    | gttttGGCTGGCTTTGACATPA          | 60.59 | 117 | 56/32   |
| 17 | GRW3011  | *     | gSSR     | LG3 | Scaffold3     | 8606684      | Clementine v1.0                 | (TAT)n        | F9GAC | ctagatcaggagcagcCAGGACACAGCTTCAACAC     | 62.02 | gttt    | gttttAAAGCTTAGCCTCTCCACC        | 61.58 | 94  | 58/32   |
| 18 | GSRI0509 | *     | gSSR     | L05 | BDG001000073  | 2983         | Shimizu, T. et al. unpublished  | (aga)n        | F9GCC | ctagatcaggagcagcCGGACAGCAAAAATAACCTG    | 56.77 | gttt    | gttttATAAACAAGCAGTGTAGC         | 57.57 | 196 | 54/32   |
| 19 | GSRI0517 | *     | gSSR     | L05 | BDG001000144  | 3275         | Shimizu, T. et al. unpublished  | (attatc)n     | F9GAC | ctagatcaggagcagcGTCACTGATGTTATCAAC      | 57.17 | g       | gttttATTATGTGACGTGGAAAGC        | 58.08 | 163 | 54/32   |
| 20 | GSRI0529 | *     | gSSR     | L02 | BDG001000234  | 2691         | Shimizu, T. et al. unpublished  | (ttaa)n       | F9GTC | ctagatcaggagcagcTCTCCCTCTGTGCTTAAATC    | 56.92 | gttt    | gttttATTATTTCTTACCGTGGAGC       | 57.67 | 139 | 54/32   |
| 21 | GSR2101  | *     | gSSR     | L01 | BUZY106502.bl | 151          | NCBI Trace Archive              | (ta)n(ga)n    | F9GAC | ctagatcaggagcagcAAATGAAATGTAATGACGGAGAT | 57.07 | gttt    | gttttGAGATCTTATAATGAAAGCTCTC    | 57.07 | 113 | 54/34   |
| 22 | GSR2103  | *     | gSSR     | L01 | BUZY123497.bl | 527          | NCBI Trace Archive              | (ga)n         | F9TAC | ctagatcaggagcagcAATGCAATGCACTCTTGTTC    | 59.26 | gttt    | gttttGACCAATCTAGTACTGCTTGG      | 58.48 | 221 | 56/32   |
| 23 | GSR2108  | *     | gSSR     | L03 | BUZY133352.bl | 1069         | NCBI Trace Archive              | (atc)n        | F9GTC | ctagatcaggagcagcTCTTACAGACTGCTCC        | 59.26 | gttt    | gttttAGCTTCTTCTTCCAC            | 59.23 | 176 | 56/32   |
| 24 | GSR2129  | *     | gSSR     | LG3 | BUZY33352.bl  | 639          | NCBI Trace Archive              | (atc)n        | F9GCC | ctagatcaggagcagcTCTGCTGCTTGTGTAATAGAG   | 61.03 | gttt    | gttttGGTTAGAGGCAACATTTCC        | 58.73 | 157 | 54/34   |
| 25 | GSR2131  | *     | gSSR     | L08 | BUZY261862.g1 | 600          | NCBI Trace Archive              | (ac)n         | F9GAC | ctagatcaggagcagcTCTTGTGAGTACAGTGTGAG    | 59.84 | gttt    | gttttGTTACTGACTGATAGTGTGAG      | 59.28 | 156 | 60/32   |
| 26 | GSR2150  | *     | gSSR     | L01 | BUZY112333.g1 | 589          | NCBI Trace Archive              | (tcc)n        | F9GTC | ctagatcaggagcagcGTTGATCTTCCCTTCTCCTC    | 58.16 | gttt    | gttttACTGTCTTCTTCTGCTACC        | 59.78 | 234 | 56/36   |
| 27 | GSR3114  | *     | gSSR     | LG7 | BUZY25274.bl  | 204          | NCBI Trace Archive              | (atc)n        | F9GTC | ctagatcaggagcagcATCCCGCTCTTCTGATATG     | 59.32 | gttt    | gttttAGTGTAGCAAAATAGTCGGT       | 59.03 | 155 | 56/32   |
| 28 | GSR3121  | *     | gSSR     | LG4 | BUZY53309.g1  | 466          | NCBI Trace Archive              | (aag)n        | F9TAC | ctagatcaggagcagcCCAGTAATCAGACAACTTAGG   | 58.52 | gttt    | gttttCGAAATCTGTTAGCTTAAGAG      | 58.81 | 156 | 54/32   |
| 29 | GSR3126  | *     | gSSR     | LG7 | BUZY170281.g1 | 793          | NCBI Trace Archive              | (aac)n        | F9GTC | ctagatcaggagcagcCGCCAACTGACAAAACAT      | 59.61 | gttt    | gttttGTACACAGACTCAACAA          | 57.45 | 209 | 56/32   |
| 30 | GSR3128  | *     | gSSR     | --  | BUZY72931.g1  | 514          | NCBI Trace Archive              | (gaa)n        | F9TCC | ctagatcaggagcagcCGGGTGTCTTCTTATGTC      | 58.79 | gttt    | gttttATGAGAGGCTCTAATCTTGG       | 59.27 | 127 | 56/32   |
| 31 | GSR3136  | *     | gSSR     | LG3 | BUZY128287.bl | 671          | NCBI Trace Archive              | (atc)n(gt)c)n | F9AGG | ctagatcaggagcagcGCCAGTCACTCTTCAATG      | 59.37 | gttt    | gttttCTTGAGTGAAGAAAGTGA         | 61.58 | 133 | 58/32   |
| 32 | GSR3137  | *     | gSSR     | LG8 | BUZY232019.g1 | 765          | NCBI Trace Archive              | (aat)n        | F9GAC | ctagatcaggagcagcGCCATCACTTGTATTCCT      | 58.22 | gttt    | gttttTAATCTGATGAGCGATCCT        | 57.57 | 163 | 56/32   |
| 33 | GSR3138  | *     | gSSR     | LG5 | BUZY63372.g1  | 120          | NCBI Trace Archive              | (aat)n        | F9GTC | ctagatcaggagcagcGCCTTGTCAACTGGAAATCG    | 61.82 | gttt    | gttttCTAAAGTCTGCTGTTGTGT        | 61.83 | 135 | 54/32   |
| 34 | GSR3140  | *     | gSSR     | LG5 | BUZY59969.bl  | 213          | NCBI Trace Archive              | (aat)n        | F9TCC | ctagatcaggagcagcCGGAGAAAGGAAATTTAGT     | 59.47 | gttt    | gttttGTGGTATGATGAGAGGAG         | 57.37 | 170 | 56/32   |
| 35 | GSR3141  | *     | gSSR     | LG8 | BUZY111250.g1 | 389          | NCBI Trace Archive              | (att)n        | F9GCC | ctagatcaggagcagcGGATATACCTGATTAAGTAGAG  | 57.25 | gttt    | gttttAATAGTAGGATCTGAGTTAC       | 57.07 | 144 | 56/34   |
| 36 | GSR3105  | *     | gSSR     | --  | BUZY29671.g1  | 106          | NCBI Trace Archive              | (atctc)n      | F9GCC | ctagatcaggagcagcTAATGCAATGAGCCCAAAAG    | 56.57 | gtttctt | gtttcttCAACTATGAGAGGAGGAGG      | 57.18 | 116 | 60/32   |
| 37 | GSR5112  | *     | gSSR     | L08 | BUZY9077.bl   | 1002         | NCBI Trace Archive              | (ata)n        | F9GTC | ctagatcaggagcagcTCTGCTGACTCAAGACTAG     | 57.09 | gttt    | gttttCTTGCATCTTCTTCCAC          | 59.98 | 228 | 56/34   |
| 38 | GSR5114  | *     | gSSR     | L05 | BUZY129906.g1 | 488          | NCBI Trace Archive              | (aaac)n       | F9TAC | ctagatcaggagcagcTAGTAACCGTGAAGTGA       | 56.27 | gtttctt | gtttcttAACTGTGAAAGTAAATGTGG     | 57.05 | 308 | 56/36   |
| 39 | GSR5122  | *     | gSSR     | LG3 | BUZY155080.g1 | 1878         | NCBI Trace Archive              | (cgccc)n      | F9GCC | ctagatcaggagcagcCACATGACTTCTTCTTTCAG    | 56.96 | gtttc   | gttttCTTCCOATTTCACTCCCAAG       | 56.81 | 253 | 56/32   |
| 40 | GSR5127  | *     | gSSR     | L03 | BUZY8842.bl   | 463          | NCBI Trace Archive              | (caagc)n      | F9GCC | ctagatcaggagcagcCACTTAAGTCTTCTTCTGCTC   | 56.57 | gtttctt | gtttcttACGAGATGTCACACTTTTGG     | 56.87 | 179 | 54/32   |
| 41 | GSR5129  | *     | gSSR     | LG3 | BUZY254533.g1 | 270          | NCBI Trace Archive              | (tgagc)n      | F9AGG | ctagatcaggagcagcGCCTTGATAAAATTTCTGTC    | 56.79 | gtttctt | gtttcttAAAACACTTCAAGATCCACC     | 56.77 | 260 | 56/34   |
| 42 | GSR6101  | *     | gSSR     | LG7 | BUZY128935.g1 | 107          | NCBI Trace Archive              | (cgccga)n     | F9GCC | ctagatcaggagcagcAATAAACAAGGAAAGG        | 57.04 | gttt    | gttttGTCAACATCCCATATAGCAAG      | 57.04 | 248 | 60/32   |
| 43 | GSR6122  | *     | gSSR     | L02 | BUZY50477.bl  | 103          | NCBI Trace Archive              | (aaacga)n     | F9GCC | ctagatcaggagcagcCTAAGAAGTGTGCTAGGTTG    | 57.15 | gtttctt | gtttcttTGATGATCAAAAGACCTCC      | 57.15 | 213 | 54/32   |
| 44 | GSR6129  | *     | gSSR     | LG6 | BUZY22109.bl  | 229          | NCBI Trace Archive              | (gaaggt)n     | F9AGG | ctagatcaggagcagcGAGAAGAAAGTGAAGTGG      | 57.48 | gtttctt | gtttcttAAAGTCAAAAGAAAGTGAAG     | 56.79 | 227 | 56/30   |
| 45 | GSR6133  | *     | gSSR     | LG6 | BUZY106766.g1 | 443          | NCBI Trace Archive              | (ctgggg)n     | F9GCC | ctagatcaggagcagcGTTTGTACTTCTTGTGCTG     | 57.22 | gtttc   | gttttTCTGGGCTTACTCTCAAT         | 57.22 | 256 | 54/32   |
| 46 | GSR6135  | *     | gSSR     | LG7 | BUZY210038.g1 | 459          | NCBI Trace Archive              | (aggggt)n     | F9AGG | ctagatcaggagcagcAGGTTTTACGATTTCCAG      | 56.96 | gtttctt | gtttcttGAAACACAGTATGAGGTGAAG    | 56.96 | 178 | 56/32   |
| 47 | NSX02    | *     | gSSR     | LG3 | scaffold_3    | 8740         | Clementine haploid v.0.9        | (TA)n(CA)n    | F9GTC | ctagatcaggagcagcCACTACATCGCCATCAACC     | 60.66 | gtttctt | gtttcttTACTCGTGGACTCATGACTC     | 61.46 | 143 | 54/32   |
| 48 | NSX23    | *     | gSSR     | LG3 | scaffold_3    | 5899745      | Clementine haploid v.0.9        | (TAA)n        | F9GCC | ctagatcaggagcagcAGATGATGCTTCCATCAAAATC  | 60.18 | gtttctt | gtttcttGTTGTGTATTAATGACTTTGCAAT | 59.67 | 246 | 54/32   |
| 49 | NSX32    | *     | gSSR     | LG3 | scaffold_3    | 8574561      | Clementine haploid v.0.9        | (TTTGGA)n     | F9GTC | ctagatcaggagcagcCTTTGTGGGAATGTGACAGA    | 60.74 | gtttctt | gtttcttAAAGACTCGAATGCTGACCT     | 60.73 | 261 | 56/32   |
| 50 | NSX34    | *     | gSSR     | LG3 | scaffold_3    | 8970241      | Clementine haploid v.0.9        | (TAA)n(ATC)n  | F9GCC | ctagatcaggagcagcTATCCCACTGCAACAATCTAAT  | 60.65 | gtttctt | gtttcttTTATGTTGCTTTATGACCCCAAT  | 59.83 | 259 | 54/34   |
| 51 | NSX38    | *     | gSSR     | LG2 | scaffold_1    | 13148619     | Clementine haploid v.0.9        | (AT)n         | F9GTC | ctagatcaggagcagcTCTGCTGCTCTTGTACTCT     | 59.48 | gtttctt | gtttcttGCTTAAACAACAGCTCC        | 58.32 | 244 | 56/32   |
| 52 | NSX39    | *     | gSSR     | LG2 | scaffold_1    | 13086339     | Clementine haploid v.0.9        | (TGA)n        | F9TAC | ctagatcaggagcagcGTAAATGTAATCAATCCAGAT   | 57.64 | gtttctt | gtttcttGCCATAAATCTTCTACTAGAT    | 58.29 | 202 | 56/32   |
| 53 | NSX43    | *     | gSSR     | L05 | scaffold_1    | 12772252     | Clementine haploid v.0.9        | (TTCATGA)n    | F9GAC | ctagatcaggagcagcTCTGCTGCTTCAATCTGCT     | 59.94 | gtttctt | gtttcttAACTTAAACCTCAACTCAGCT    | 58.81 | 158 | 58/32   |
| 54 | NSX48    | *     | gSSR     | LG5 | scaffold_1    | 11014805     | Clementine haploid v.0.9        | (CTATCT)n     | F9AGG | ctagatcaggagcagcATGCTGCTCACTAAATGAGT    | 58.45 | gtttctt | gtttcttTTGCTAAGGAGGATGGAAGT     | 58.04 | 128 | 56/32   |
| 55 | NSX53    | *     | gSSR     | L05 | scaffold_1    | 9577531      | Clementine haploid v.0.9        | (ATT)n(TTV)n  | F9GCC | ctagatcaggagcagcAATTTCAACTTCACTCCATCA   | 59.10 | gtttctt | gtttcttGCTGTATTTGCAATGACTAT     | 58.00 | 187 | 56/32   |
| 56 | NSX67    | *     | gSSR     | LG5 | scaffold_1    | 6050494      | Clementine haploid v.0.9        | (TATT)n       | F9GAC | ctagatcaggagcagcCAGGATGCTCCTCACTTAGGA   | 60.82 | gtttctt | gtttcttCGCTGTATCAACAAGTACTAAGA  | 60.48 | 173 | 54/32   |
| 57 | NSX79    | *     | gSSR     | LG5 | scaffold_1    | 1989018      | Clementine haploid v.0.9        | (TAGT)n       | F9GAC | ctagatcaggagcagcTAGCGGGTGTAGCTTCT       | 61.45 | gtttctt | gtttcttTATCTATCAACAACCTTGTGCGAA | 60.12 | 223 | 56/32   |
| 58 | NSX82    | *     | gSSR     | LG5 | scaffold_1    | 11437282     | Clementine haploid v.0.9        | (TC)n         | F9GCC | ctagatcaggagcagcGTGTAGCTTCAAGACTGAG     | 58.38 | gtttctt | gtttcttGGCACTCAATACCTGCT        | 58.26 | 262 | 58/32   |
| 59 | NSX84    | *     | gSSR     | LG5 | scaffold_1    | 6046416      | Clementine haploid v.0.9        | (TGCTAG)n     | F9AGG | ctagatcaggagcagcTGAAGAAATGAAAGTCACTG    | 58.70 | gtttctt | gtttcttGAGAAGAAATGTTAAGAGCCAAAG | 60.63 | 174 | 56/32   |
| 60 | NSX115   | *     | gSSR     | LG7 | scaffold_23   | 2031639      | Clementine haploid v.0.9        | (CTT)n        | F9TAC | ctagatcaggagcagcCAATTAATGAAAGTGAAGG     | 58.12 | gtttctt | gtttcttTCAACTGACTGACTTAATTTCTA  | 57.72 | 112 | 56/32   |
| 61 | NSX119   | *     | gSSR     | LG9 | scaffold_27   | 158921       | Clementine haploid v.0.9        | (GT)n(AT)n    | F9TAC | ctagatcaggagcagcCGACTCATCTTATCTCAAACTC  | 60.13 | gtttctt | gtttcttTAGACTACAGATCCACAGC      | 58.27 |     |         |

|     |          |       |          |             |             |                          |                                       |                                |                                           |                                           |         |         |                            |                        |       |       |       |
|-----|----------|-------|----------|-------------|-------------|--------------------------|---------------------------------------|--------------------------------|-------------------------------------------|-------------------------------------------|---------|---------|----------------------------|------------------------|-------|-------|-------|
| 88  | TSGR222  |       | gSSR     | LQ1         | Scaffold_1  | Clementine v1.0          | (ttt)atn                              | F9CCG                          | ctagattaggaccgctTGAGACACTCCACTATAACMTT    | 57.49                                     | gttttct | gttttct | TGGTGAGCGGGTGGTAA          | 57.97                  | 196   | 58/32 |       |
| 89  | TSGR264  | *     | gSSR     | LQ2         | Scaffold_2  | Clementine v1.0          | (aa)tn                                | F9CCG                          | ctagattaggaccgctTAACACCACTCCACTAACTTCCA   | 59.72                                     | gttttct | gttttct | TGGGAAACATTTAGACCTCCGCT    | 60.01                  | 140   | 58/32 |       |
| 90  | TSGR265  | **    | gSSR     | LQ2         | Scaffold_2  | Clementine v1.0          | (ta[gc]n) (caa)n                      | F9CCG                          | ctagattaggaccgctACAGCTGCCACTAATTCATCC     | 57.94                                     | gttttct | gttttct | TATCTCCAAAGACTCCAACCT      | 57.54                  | 165   | 56/32 |       |
| 91  | TSGR271  | *     | gSSR     | --          | Scaffold_9  | Clementine v1.0          | (ata)n                                | F9CCG                          | ctagattaggaccgctCTTTAGAGCTCAGGCTC         | 59.18                                     | gttttct | gttttct | ACTGCTGGTATGTAAGACCTT      | 59.42                  | 202   | 56/32 |       |
| 92  | TSGR282  |       | gSSR     | LQ3         | Scaffold_3  | Clementine v1.0          | (tttttc)n (tg)n                       | F9CCG                          | ctagattaggaccgctAGCAAATTAATTAACAGGCT      | 57.70                                     | gttttct | gttttct | CTCTGAAATGGCTCTGCC         | 58.98                  | 251   | 56/32 |       |
| 93  | NSX16    | INDEL | --       | scaffold_3  | 4098890     | Clementine haploid v.0.9 | CCATGTTAACTAAAGAGAATCTGTCTGCATCAACA/C | F9CCG                          | ctagattaggaccgctCCGCAATTAACACGAGG         | 58.11                                     | gttttct | gttttct | LATGTTGCCGGTAATTTCTTGG     | 58.93                  | 114   | 60/32 |       |
| 94  | NSX27    | INDEL | LQ3      | scaffold_3  | 7642393     | Clementine haploid v.0.9 | AC/AAAAAC                             | F9TAC                          | ctagattaggaccgctGAATCTCAATGACGACGGCA      | 59.61                                     | gttttct | gttttct | CACATGTCATCTAGCCATCA       | 58.95                  | 322   | 56/32 |       |
| 95  | NSX28    |       | INDEL    | LQ3         | scaffold_3  | 8000304                  | Clementine haploid v.0.9              | A/ACT                          | ctagattaggaccgctTTGGAGAATTTGAAACAGCAAA    | 57.07                                     | gttttct | gttttct | TCGAGTTTACAGTTTCCACTTACAA  | 58.56                  | 234   | 54/32 |       |
| 96  | NSX70    | *     | INDEL    | --          | scaffold_1  | 5092937                  | Clementine haploid v.0.9              | A/ACAGCAAT                     | F9GCC                                     | ctagattaggaccgctAAAGACTAGTGGACGCTCAG      | 59.50   | gttttct | gttttct                    | TACAATGATTTGAAGCTCTCC  | 59.48 | 132   | 54/32 |
| 97  | NSX87    |       | INDEL    | LQ5         | scaffold_37 | 1669                     | Clementine haploid v.0.9              | AGTT/AGTTAGACAATGTT            | F9TAC                                     | ctagattaggaccgctAGATCTCTCATAAAGCAATA      | 57.60   | gttttct | gttttct                    | TGAGCAAGTGAACCTTAAACGA | 58.30 | 132   | 56/32 |
| 98  | NSX94    | INDEL | LQ5      | scaffold_37 | 1274730     | Clementine haploid v.0.9 | CAAGAG/CAAG                           | F9GCC                          | ctagattaggaccgctCAAGTCTCAACAAACCTTCTGT    | 60.60                                     | gttttct | gttttct | GAATGTGGAAAGGGCTTCTTA      | 59.05                  | 117   | 56/32 |       |
| 99  | NSX118   |       | INDEL    | LQ9         | scaffold_27 | 27707                    | Clementine haploid v.0.9              | TACGAGTATTA/TA                 | F9GTC                                     | ctagattaggaccgctCGCTTCTGCAATGAGGTA        | 58.14   | gttttct | gttttct                    | TGGTGGCTGGTGGAGTATGTA  | 61.48 | 142   | 58/32 |
| 100 | NSX129   | INDEL | LQ9      | scaffold_27 | 326975      | Clementine haploid v.0.9 | CCA/GCACACTCA                         | F9GAC                          | ctagattaggaccgctCGCTTCTGCAATGAGGTA        | 58.53                                     | gttttct | gttttct | TCGAAATTTACAGTTTCCACTTACAA | 58.19                  | 210   | 56/32 |       |
| 101 | NSX148   |       | INDEL    | LQ8         | scaffold_16 | 3943508                  | Clementine haploid v.0.9              | TTAATACGTGTAAT/TT              | F9GTC                                     | ctagattaggaccgctcAAGCTTAACTGGCTGCT        | 61.81   | gttttct | gttttct                    | TTTGCGAACTGGATTTCTT    | 61.90 | 149   | 54/32 |
| 102 | NSX161   | *     | INDEL    | LQ8         | scaffold_52 | 156369                   | Clementine haploid v.0.9              | AATTCGAT/AATTCGATTTAAGGATTCGAT | F9GCC                                     | ctagattaggaccgctcAGAAATCAAGTAACTGGCTTTTAT | 57.65   | gttttct | gttttct                    | TATCCCAAACTCCACTACATCT | 59.47 | 101   | 56/32 |
| 103 | NSX179   | INDEL | LQ7      | scaffold_68 | 414820      | Clementine haploid v.0.9 | AAAGTGCAA/*                           | F9TAC                          | ctagattaggaccgctcTTCCAAACATATTTCCACTCA    | 58.89                                     | gttttct | gttttct | CTTTGAAGAGTCCGCAATATTA     | 57.44                  | 251   | 54/34 |       |
| 104 | TS1A0A29 |       | INDEL    | LQ1         | EY715084    | 473 EY715084             | c/TC/CCTCTC/CTCTCCTCTC/CTCCTCTCA/A    | F9TCC                          | ctagattaggaccgctCCTCTTGTCCACATTTCT        | 58.00                                     | gttt    | gttt    | ACATCAACTCCGTAAGCAAG       | 57.61                  | 222   | 54/34 |       |
| 105 | SSR07A05 | *     | EST/cDNA | LG2         | CX663436    |                          | (cac)n                                | EST/cDNA                       | ctagattaggaccgctTCTTGAGCAATCTCATGTCTC     | 58.63                                     | gttttct | gttttct | CAGGATTAGGCTATTGGCTG       | 58.28                  | 140   | 56/32 |       |
| 106 | SSR07A07 | *     | EST/cDNA | LQ4         | CX663643    |                          | (gaa)n                                | EST/cDNA                       | ctagattaggaccgctGCTCACTTAGGAAGAATCAG      | 57.74                                     | gttttct | gttttct | TGGAGGTTCTTTATCTTCTTGG     | 56.90                  | 176   | 58/34 |       |
| 107 | SSR07A14 | *     | EST/cDNA | --          | CX666503    |                          | (att)n                                | EST/cDNA                       | ctagattaggaccgctacGCAATATGGCTTAAAGCT      | 59.46                                     | gttttct | gttttct | CAGGCTCTTCTCATCATCCAC      | 57.86                  | 141   | 54/32 |       |
| 108 | SSR07A17 |       | EST/cDNA | LQ2         | CX667444    |                          | (atg)n                                | EST/cDNA                       | ctagattaggaccgctGGCTCAATCATATAACAG        | 59.55                                     | gttt    | gttt    | TCTCTCATCATTTCCCACTCG      | 59.14                  | 223   | 56/34 |       |
| 109 | SSR07A19 | *     | EST/cDNA | LQ3         | CX669071    |                          | (cat)n                                | EST/cDNA                       | ctagattaggaccgctGTTGGTTGTTTATCTCTCTGTG    | 55.78                                     | gttttct | gttttct | GAAGATCAGAAAGATGATTGAG     | 56.48                  | 129   | 56/34 |       |
| 110 | SSR07A23 | *     | EST/cDNA | LQ7         | CX670335    |                          | (ca[ct]n)                             | EST/cDNA                       | ctagattaggaccgctcATGGCCAAACCAATATCC       | 59.38                                     | gttt    | gttt    | CTAATTTCCGACATTTCCCTG      | 59.49                  | 192   | 56/32 |       |
| 111 | SSR07A24 | *     | EST/cDNA | LQ9         | CX670407    |                          | (aa)n                                 | EST/cDNA                       | ctagattaggaccgctcCTTACAGGCTCTTCCACTACG    | 58.64                                     | gttttct | gttttct | TAACATCTCACTACAGATCAGCA    | 58.86                  | 168   | 54/34 |       |
| 112 | SSR07A20 | *     | EST/cDNA | LQ5         | CX669338    |                          | (ttc)n (tac)n (gac)n                  | EST/cDNA                       | ctagattaggaccgctcCCTAATGACTTCATGACCTT     | 59.37                                     | gttt    | gttt    | CCGATCTGGCATCTCTTGGC       | 58.83                  | 201   | 58/32 |       |
| 113 | SSR07A21 | *     | EST/cDNA | LQ1         | CX669454    |                          | (ct)n                                 | EST/cDNA                       | ctagattaggaccgctcTGCTGTAATTTCCAGGCTC      | 62.45                                     | gttt    | gttt    | CTATCTTCTGAGGCGCTC         | 57.23                  | 137   | 54/32 |       |
| 114 | SSR07B05 | *     | EST/cDNA | --          | CX936720    |                          | (gac)n                                | EST/cDNA                       | ctagattaggaccgctcCTTCCATCACTCACTGTTA      | 57.73                                     | gttt    | gttt    | CCACAGCATCACTCAAA          | 60.05                  | 177   | 58/32 |       |
| 115 | SSR07B08 | *     | EST/cDNA | LQ3         | CB292573    |                          | (cgc)n                                | EST/cDNA                       | ctagattaggaccgctcTATTCGCTCAGCATCAGCA      | 62.53                                     | gtttct  | gtttct  | CTAATCCGACATTTGGTAGTGG     | 60.31                  | 192   | 54/30 |       |
| 116 | SSR07B09 | *     | EST/cDNA | LQ9         | CB292707    |                          | (cgt)n                                | EST/cDNA                       | ctagattaggaccgctcTTTACAGCTGTTTGGTCTG      | 59.28                                     | gtttct  | gtttct  | CCGTTGGATATCATGATGAGT      | 60.27                  | 203   | 54/34 |       |
| 117 | SSR07B14 | *     | EST/cDNA | LQ7         | CX183851    |                          | (ctt)n                                | EST/cDNA                       | ctagattaggaccgctcTTGCTCACTACTTGACTG       | 61.60                                     | gttt    | gttt    | GGCTTTATGTCGGATCTG         | 61.36                  | 215   | 56/32 |       |
| 118 | SSR07B27 | *     | EST/cDNA | LQ5         | CX671829    |                          | (cct)n                                | EST/cDNA                       | ctagattaggaccgctcTACTTGGTACCAAGAAGAC      | 59.07                                     | gtttct  | gtttct  | TGAGGCAAGAAAGTGTCTCT       | 60.49                  | 191   | 54/32 |       |
| 119 | SSR07B25 |       | EST/cDNA | LQ9         | CX074011    |                          | (gaa)n                                | EST/cDNA                       | ctagattaggaccgctcAGGCTACTTCTAATCCATTTCT   | 60.86                                     | gttt    | gttt    | GCCATTTGCTTCTTACTTACT      | 60.19                  | 211   | 54/32 |       |
| 120 | SSR07B30 |       | EST/cDNA | LQ5         | CX665183    |                          | (ta)n                                 | EST/cDNA                       | ctagattaggaccgctcCAGTAATGGAAGTGTTCCT      | 60.04                                     | gtttct  | gtttct  | TGGCAAAACAAGTCTATTCCT      | 60.27                  | 185   | 56/32 |       |
| 121 | SSR08A02 | *     | EST/cDNA | --          | DY267483    |                          | (ttta)n                               | EST/cDNA                       | ctagattaggaccgctcTACCTATTCTTCTTGTCC       | 57.16                                     | gttt    | gttt    | AACAGTGAATTTGACCGA         | 57.69                  | 150   | 54/32 |       |
| 122 | SSR08A06 | *     | EST/cDNA | LQ1         | DY304961    |                          | (ttta)n                               | EST/cDNA                       | ctagattaggaccgctcGTTATTTCAAGTATGTTGTCAG   | 57.50                                     | gttttct | gttttct | TATAGGCCAACATCAATTTCCC     | 60.34                  | 126   | 58/32 |       |
| 123 | SSR08A07 | *     | EST/cDNA | --          | DY257192    |                          | (caga)n                               | EST/cDNA                       | ctagattaggaccgctcAATATTCAGCAGACAGACAG     | 59.99                                     | gttttct | gttttct | TAATTTGCTTGTCTCGAGG        | 61.02                  | 123   | 58/32 |       |
| 124 | SSR08A09 | *     | EST/cDNA | LQ2         | CX663959    |                          | (cagg)n                               | EST/cDNA                       | ctagattaggaccgctcCATCTTGCATCAGACTCAC      | 60.08                                     | gttttct | gttttct | LATGTTCTACATCAACTCTGCC     | 59.71                  | 116   | 56/32 |       |
| 125 | SSR08A14 | *     | EST/cDNA | LQ2         | DN618700    |                          | (aaat)n                               | EST/cDNA                       | ctagattaggaccgctcTCCGTCACATCATAGACTC      | 60.01                                     | gttttct | gttttct | TGGGCTTTCTTCTTGTCTCT       | 60.88                  | 186   | 58/32 |       |
| 126 | SSR08A15 | *     | EST/cDNA | LQ5         | CX665717    |                          | (aaat)n                               | EST/cDNA                       | ctagattaggaccgctcATTTTCCGAAAGTGAAGT       | 59.51                                     | gttt    | gttt    | ATTTCCCATATCTCCAAAT        | 57.25                  | 141   | 58/32 |       |
| 127 | SSR08A16 | *     | EST/cDNA | LQ5         | DN134966    |                          | (caga)n                               | EST/cDNA                       | ctagattaggaccgctcCATATTTCCAGGTAAGTCAAGT   | 59.51                                     | gttttct | gttttct | TATTTCCATCACTCTGAAATG      | 57.23                  | 145   | 56/32 |       |
| 128 | SSR08B02 | *     | EST/cDNA | LQ6         | DY300589    |                          | (aat)n                                | EST/cDNA                       | ctagattaggaccgctcTCTGCTCAAGACTCTGCT       | 61.13                                     | gttt    | gttt    | CATTTGAGCAAGAGCTGAAG       | 62.11                  | 126   | 56/32 |       |
| 129 | SSR08B06 | *     | EST/cDNA | LQ9         | DY298942    |                          | (cct)n                                | EST/cDNA                       | ctagattaggaccgctcTAACTGCTCCGATCAAGCTG     | 62.36                                     | gttttct | gttttct | CCGCACTGGTAATCAAGCA        | 62.19                  | 121   | 60/32 |       |
| 130 | SSR08B13 |       | EST/cDNA | LQ9         | DY295447    |                          | (cct)n                                | EST/cDNA                       | ctagattaggaccgctcTAACTGCTCCGATCAAGCTG     | 62.51                                     | gttttct | gttttct | CCGCACTGGTAATCAAGCA        | 62.29                  | 121   | 56/32 |       |
| 131 | SSR08B15 | *     | EST/cDNA | LQ7         | DY292389    |                          | (acc)n                                | EST/cDNA                       | ctagattaggaccgctcACCATCACTTAACTCAAC       | 59.14                                     | gttttct | gttttct | TAGCAGCATGACTTAATCCA       | 59.01                  | 106   | 56/32 |       |
| 132 | SSR08B20 | *     | EST/cDNA | LQ9         | DY291354    |                          | (att)n                                | EST/cDNA                       | ctagattaggaccgctcGCTGTACAAAGTGTGGTGG      | 61.07                                     | gttt    | gttt    | ACAGTCCGAGACTTAGAC         | 62.95                  | 152   | 56/32 |       |
| 133 | SSR08B21 | **    | EST/cDNA | LQ2         | DY290555    |                          | (acc)n                                | EST/cDNA                       | ctagattaggaccgctcATGCTCACTCACTCACTTACT    | 58.95                                     | gttt    | gttt    | CTTGGCGCTTTAGAAATG         | 59.51                  | 130   | 60/32 |       |
| 134 | SSR08B22 |       | EST/cDNA | LQ7         | DY289533    |                          | (aat)n                                | EST/cDNA                       | ctagattaggaccgctcTTATCAATCACTCTGCTACC     | 58.94                                     | gttt    | gttt    | ACGCGCATTCACTCTTAA         | 58.90                  | 138   | 56/32 |       |
| 135 | SSR08B25 | **    | EST/cDNA | LQ9         | DY289996    |                          | (aat)n                                | EST/cDNA                       | ctagattaggaccgctcGTTGACTCTCAAGAGATCTG     | 60.19                                     | gttt    | gttt    | CTTCAAGCTCCGACGATTA        | 62.84                  | 123   | 56/32 |       |
| 136 | SSR08B27 | *     | EST/cDNA | LQ6         | DY288475    |                          | (ctca)n (ctcg)n                       | EST/cDNA                       | ctagattaggaccgctcCAACTCACTCACTCTGCTCTC    | 60.59                                     | gttttct | gttttct | GCTTAATTTCACTACTCCGAG      | 62.97                  | 101   | 60/32 |       |
| 137 | SSR08B28 | *     | EST/cDNA | LQ2         | DY286595    |                          | (aat)n                                | EST/cDNA                       | ctagattaggaccgctcATCTCCACTCTTATGACTG      | 61.78                                     | gttttct | gttttct | LATGTAACAAGTTCCTTGGCT      | 62.95                  | 181   | 58/32 |       |
| 138 | SSR08B29 | *     | EST/cDNA | LQ6         | DY285888    |                          | (cgg)n                                | EST/cDNA                       | ctagattaggaccgctcCTCTCAGCAGAGACTCAC       | 59.46                                     | gttttct | gttttct | TGGGCTACTGATGACTG          | 58.93                  | 160   | 56/32 |       |
| 139 | SSR08B31 | *     | EST/cDNA | LQ4         | DY283748    |                          | (gag)n                                | EST/cDNA                       | ctagattaggaccgctcCACTGAAATATTTCAACAATCGAG | 58.18                                     | gttttct | gttttct | LATGTTCCGAAACAGTGAAGT      | 58.41                  | 129   | 56/32 |       |
| 140 | SSR08B32 | *     | EST/cDNA | LQ6         | DY281946    |                          | (aat)n                                | EST/cDNA                       | ctagattaggaccgctcATATTCATCTCCGCAAGTGT     | 59.28                                     | gttt    | gttt    | GCCAACTCACTACTCTCAT        | 60.14                  | 94    | 56/30 |       |
| 141 | SSR08B33 | **    | EST/cDNA | LQ2         | DY287625    |                          | (cga)n                                | EST/cDNA                       | ctagattaggaccgctcCTCTCTCTCTCTCTA          | 57.84                                     | gttt    | gttt    | ATGCTCACTCTCTCTCT          | 58.74                  | 170   | 54/32 |       |
| 142 | SSR08B38 | *     | EST/cDNA | LQ3         | DY283862    |                          | (cat)n                                | EST/cDNA                       | ctagattaggaccgctcACTCCTTTAAATTTCTCTGCT    | 57.63                                     | gttt    | gttt    | CCGAAACAATCAAGAAATCTG      | 58.03                  | 115   | 56/32 |       |
| 143 | SSR08B40 | **    | EST/cDNA | LQ2         | DY280605    |                          | (aat)n                                | EST/cDNA                       | ctagattaggaccgctcACTCCCACTGTTTATGACTG     | 61.98                                     | gttttct | gttttct | GCCTTTCGCTCACTGATA         | 61.97                  | 171   | 56/32 |       |
| 144 | SSR08B44 | *     | EST/cDNA | LQ3         | DY276228    |                          | (ctca)n (ctcg)n                       | EST/cDNA                       | ctagattaggaccgctcACTCCTTTAAATTTCTCTGCTG   | 57.87                                     | gttttct | gttttct | CCGCAACAATCAAGTAACTG       | 58.22                  | 118   | 54/34 |       |
| 145 | SSR08B47 | *     | EST/cDNA | LQ3         | DY272433    |                          | (aat)n                                | EST/cDNA                       | ctagattaggaccgctcACTCCTTTAAATTTCTCTGCTG   | 57.87                                     | gttt    | gttt    | GAATCCGAAACAATCAAGTAA      | 57.54                  | 119   | 56/32 |       |
| 146 | SSR08B54 | **    | EST/cDNA | LQ2         | DY268149    |                          | (cgg)n                                | EST/cDNA                       | ctagattaggaccgctcCATCTCACTCTCCACT         | 60.74                                     | gttttct | gttttct | GCTTTCGCTCACTGATA          | 61.37                  | 180   | 58/32 |       |
| 147 | SSR08B60 | *     | EST/cDNA | --          | DY265343    |                          | (cgg)n                                | EST/cDNA                       | ctagattaggaccgctcATTCAATTTGGGGGTGAT       | 58.51                                     | gttt    | gttt    | CTCCTCCAAATAGATAAGC        | 58.17                  | 133   | 56/32 |       |
| 148 | SSR08B62 | *     | EST/cDNA | LQ5         | DY257536    |                          | (aaagtg)n (aaagtg)n                   | EST/cDNA                       | ctagattaggaccgctcTGACTCAAGTATGAGAGAG      | 59.13                                     | gttt    | gttt    | ACTGTTCTGCTTGTTCAG         | 61.43                  | 145   | 54/32 |       |
| 149 | SSR08B64 | *     | EST/cDNA | LQ4         | CV716381    |                          | (ctt)n                                | EST/cDNA                       | ctagattaggaccgctcTCAATGTTCTTCTCAACAAG     | 58.71                                     | gttt    | gttt    | GATGGGAATAGCTCTCT          | 57.98                  | 147   | 54/32 |       |
| 150 | SSR08B66 | *     | EST/cDNA | LQ8         | CV711633    |                          | (cga)n                                | EST/cDNA                       | ctagattaggaccgctcAGAGACAATCAACCGAC        | 58.47                                     | gttt    | gttt    | AAAGCAACAATTTCTCTC         | 57.96                  | 111   | 58/32 |       |
| 151 | SSR08B68 | *     | EST/cDNA | LQ3         | CV709642    |                          | (atggga)n                             | EST/cDNA                       | ctagattaggaccgctcTATGGAGGTATGATCAG        | 57.76                                     | gttt    | gttt    | GGCTACTTCCCAATTTCCC        | 59.95                  | 125   | 58/32 |       |
| 152 | SSR08B75 | *     | EST/cDNA | LQ4         | CX296800    |                          | (gttt)n                               | EST/cDNA                       | ctagattaggaccgctcCTTAGAGATTTGAGTGAAGTCA   | 58.59                                     | gttt    | gttt    | GATACCAACAACGAGTTC         | 58.12                  | 191   | 54/34 |       |
| 153 | SSR08B78 | *     | EST/cDNA | LQ7         | CX639446    |                          | (aat)n                                | EST/cDNA                       | ctagattaggaccgctcAGGCGCATTTCACTCTTAA      | 58.80                                     | gttttct | gttttct | TTATCAATACTCTGTGTACC       | 58.71                  | 142   | 56/32 |       |
| 154 | SSR08B82 | *     | EST/cDNA | LQ6         | CX677953    |                          | (ctt)n                                | EST/cDNA                       | ctagattaggaccgctcTGGCAAAAGGGTCAAGAG       | 61.83                                     | gttt    | gttt    | CAAGCTCACTCACTCACT         | 58.93                  | 169   | 56/32 |       |
| 155 | SSR08B85 | *     | EST/cDNA | LQ5         | CX076164    |                          | (cga)n                                | EST/cDNA                       | ctagattaggaccgctcTCTGCTCAAGTCTTCCC        | 61.79                                     | gttttct | gttttct | GCTTCAAGTCTTCTGAG          | 58.71                  | 153   | 54/32 |       |
| 156 | SSR08B85 | *     | EST/cDNA | LQ7         | CX072241    |                          | (ctg)n                                | EST/cDNA                       | ctagattaggaccgctcAGAGTGGCTTGAATTAACACTGA  | 60.10                                     | gttttct | gttttct | LAATGGAGGAGTGGCTATG        | 61.07                  | 191   | 60/32 |       |
| 157 | SSR08B88 | *     | EST/cDNA | LQ6         | CX044303    |                          | (gca)n                                | EST/cDNA                       | ctagattaggaccgctcACTCGCTGATGATCATTTAGT    | 59.72                                     | gttttct | gttttct | CCGCAACTCATCATGCTCAT       | 60.14                  | 115   | 56/36 |       |
| 158 | SSR08B90 | *     | EST/cDNA | LQ8         | CX934959    |                          | (aaag)n                               | EST/cDNA                       | ctagattaggaccgctcGAACCAACTTACACCGAC       | 60.81                                     | gttttct | gttttct | ACTGAGTGAATTCGCAACA        | 59.83                  | 174   | 56/30 |       |
| 159 | SSR08B92 | *     | EST/cDNA | LQ8         | CF509535    |                          | (aac)n (agc)n                         | EST/cDNA                       | ctagattaggaccgctcCTAAGCAAGTGTCTCACTC      | 59.63                                     | gttttct | gttttct | T                          |                        |       |       |       |

|     |         |    |          |     |          |          |              |       |                                          |       |         |                                |       |     |       |
|-----|---------|----|----------|-----|----------|----------|--------------|-------|------------------------------------------|-------|---------|--------------------------------|-------|-----|-------|
| 179 | TSRF116 | *  | EST/cDNA | L63 | DC895047 | EST/cDNA | (aac)n(gac)n | F9GCC | ctagatattaggacgcacAGGCCAAGAACTGACAATATCC | 60.87 | gttt    | gtttATCCATTTGGTCCCTACCATC      | 60.87 | 174 | 56/30 |
| 180 | TSRF120 | *  | EST/cDNA | L62 | CX295530 | EST/cDNA | (aag)n       | F9GTC | ctagataggagcgtcAGCTCGAGAGAGGGGAGAAAC     | 60.65 | gttt    | gtttATTCCCTGTCCAGTAAATAGC      | 60.65 | 197 | 60/32 |
| 181 | TSRF124 | *  | EST/cDNA | L67 | EY705148 | EST/cDNA | (agg)n       | F9AGG | ctagatattaggacagcAGTGGAGTTACAGCCAAACCCAG | 61.05 | gttt    | gtttCTGTAATTTGGAGTGAAGGTTG     | 61.05 | 235 | 60/32 |
| 182 | TSRF136 | *  | EST/cDNA | L65 | PC877062 | EST/cDNA | (acc)n       | F9AGG | ctagatattaggacagcAGTGGAGTTACAGCCAAACCCAG | 60.99 | gttt    | gtttGGGGGTATATAAAGAGGAGG       | 60.99 | 213 | 56/32 |
| 183 | TSRF138 | *  | EST/cDNA | --  | DY272315 | EST/cDNA | (aca)n(ata)n | F9GTC | ctagataggagcgtcACAGAGTGTGAAACTGTGTCC     | 60.78 | gttt    | gtttATATCCCGCAATACAGAGCATG     | 60.78 | 177 | 60/32 |
| 184 | TSRF144 | *  | EST/cDNA | L62 | DN618162 | EST/cDNA | (acc)n       | F9TAC | ctagatcaggactacACAGATAGTAGACCTCGAAAG     | 60.99 | gttt    | gtttAAACTTCTCTCGTGTCCCG        | 60.99 | 222 | 60/32 |
| 185 | TSRF157 | *  | EST/cDNA | L67 | DY262980 | EST/cDNA | (agc)n       | F9TAC | ctagatcaggactacGTTGTGTAGAGTTACAATCT      | 61.20 | gtttttt | gttttttCAAGGCTGGTGTATCAGATG    | 61.20 | 293 | 56/32 |
| 186 | TSRF160 | *  | EST/cDNA | --  | EY683407 | EST/cDNA | (agc)n       | F9CCG | ctagatattaggacccgTCAGAAAGAAATCATGCGCCG   | 61.05 | gtttttt | gttttttGAGCTGAACATTTTGGCAAGG   | 61.05 | 214 | 54/32 |
| 187 | TSRF161 | *  | EST/cDNA | L68 | EY651421 | EST/cDNA | (agc)n       | F9GAC | ctagatcaggacgacGCTGAAATGGCAAAACAGAGC     | 60.44 | gtttttt | gttttttGGCAACAATCTTCCCAAGTC    | 60.44 | 253 | 56/32 |
| 188 | TSRF162 | *  | EST/cDNA | L67 | DY266884 | EST/cDNA | (agcc)n      | F9TAC | ctagatcaggactacTTCAGTTTCAAAGAGGCCGAG     | 61.06 | gtttttt | gttttttCACTTTCCCACTTCCCTCATC   | 61.06 | 190 | 58/32 |
| 189 | TSRF164 | *  | EST/cDNA | --  | DY265747 | EST/cDNA | (agccaa)n    | F9GCC | ctagatattaggacccgTTCAGTACACAGGGCCATCG    | 61.12 | gtttttt | gttttttGGGACTTGTTCGGTTATCCAG   | 61.12 | 229 | 54/32 |
| 190 | TSRF167 | *  | EST/cDNA | --  | EY863111 | EST/cDNA | (att)n       | F9GCC | ctagatattaggacccgGCTGCTGATGATGATAAATCCAG | 61.48 | gtttttt | gttttttTCAGCAAAAACCAAGCTCC     | 61.48 | 175 | 58/32 |
| 191 | TSRF169 | *  | EST/cDNA | L69 | PC913104 | EST/cDNA | (ata)n       | F9GAC | ctagatcaggacgacGTGTAAACAGAGGATTCATGG     | 60.84 | gtttttt | gttttttAGATTAABAAATGGCCGTTCGG  | 60.84 | 310 | 56/32 |
| 192 | TSRF172 | *  | EST/cDNA | L64 | DY297851 | EST/cDNA | (ata)n       | F9AGG | ctagatattaggacagcGTGATACGCTTCCCAACAC     | 60.91 | gtttttt | gttttttGGCTGGCAACATTAATCTC     | 60.91 | 268 | 56/32 |
| 193 | TSRF184 | *  | EST/cDNA | L61 | EY884078 | EST/cDNA | (atc)n       | F9GCC | ctagatattaggacagcGTGGCTCTTATACCTGGGAG    | 61.04 | gtttttt | gttttttATACATCATCTGATCAGAGGAC  | 61.04 | 258 | 56/32 |
| 194 | TSRF187 | *  | EST/cDNA | --  | EY650146 | EST/cDNA | (atc)n       | F9GTC | ctagataggagcgtcTAACGGAGGAAACAGGAG        | 61.12 | gtttttt | gttttttCACTGCTGATGGTTAGGACG    | 61.12 | 237 | 62/32 |
| 195 | TSRF191 | ** | EST/cDNA | L63 | CF507794 | EST/cDNA | (atg)n       | F9GAC | ctagatcaggacgacGTTGTTCTTCCACCCACAC       | 61.72 | gtttttt | gttttttTAGACGCACATCAATCGAAGG   | 61.72 | 187 | 54/32 |
| 196 | TSRF192 | *  | EST/cDNA | L65 | CX672882 | EST/cDNA | (atg)n       | F9TAC | ctagatcaggactacAGCGAAGAAAGCAAGAAATAG     | 61.19 | gtttttt | gttttttGGCTCTTATCCCTTCCCAAG    | 61.19 | 179 | 56/32 |
| 197 | TSRF194 | *  | EST/cDNA | --  | CX637983 | EST/cDNA | (atg)n       | F9TAC | ctagatcaggactacGTGGTGTATACGACTATGC       | 61.47 | gtttttt | gttttttAGTTTATTCATCGAGCCGAG    | 61.47 | 172 | 58/34 |
| 198 | TSRF195 | *  | EST/cDNA | L63 | FC927104 | EST/cDNA | (atgaaa)n    | F9AGG | ctagatattaggacagcAGTGGAGTTGATGCTCAGATG   | 61.19 | gtttttt | gttttttCTTCCGATGTCACCAATTC     | 61.19 | 167 | 58/32 |
| 199 | TSRF198 | *  | EST/cDNA | L63 | EY849742 | EST/cDNA | (atgggg)n    | F9GAC | ctagatcaggacgacTGGCAATGCAACAACAATCTC     | 61.00 | gtttttt | gttttttTAGAAAGGAGGAAAGCAATGAGT | 61.00 | 167 | 56/32 |
| 200 | TSRF204 | *  | EST/cDNA | L65 | EY673751 | EST/cDNA | (caa)n       | F9GCC | ctagatattaggacccgTTCATCCGTTTTCACAGCTC    | 61.13 | gtttttt | gttttttGCTTCAAAACCCAGATTTCTC   | 61.13 | 207 | 56/30 |
| 201 | TSRF208 | *  | EST/cDNA | L67 | EY776018 | EST/cDNA | (caa)n       | F9GTC | ctagataggagcgtcCTCCAAACCAAACCTCTC        | 61.19 | gtttttt | gttttttGTGGGTATGAAGTTCCTGGT    | 61.19 | 214 | 62/32 |
| 202 | TSRF211 | *  | EST/cDNA | L67 | EY879492 | EST/cDNA | (caacag)n    | F9GAC | ctagatcaggacgacGAGTGAACAAGCAAGCTGTC      | 60.93 | gtttttt | gttttttAAACCCCTTTTAGCACCAGAG   | 60.93 | 243 | 60/32 |
| 203 | TSRF215 | *  | EST/cDNA | L63 | CF507794 | EST/cDNA | (cac)n       | F9AGG | ctagatattaggacagcGTTTACATGATGAAAGGGGG    | 61.72 | gtttttt | gttttttTAGACGCACATCAATCGAAGG   | 61.72 | 247 | 60/32 |
| 204 | TSRF218 | *  | EST/cDNA | L61 | CV174512 | EST/cDNA | (cag)n       | F9CCG | ctagatattaggacccgTCTGACCATCTTTCACAGCTG   | 61.41 | gtttttt | gttttttATTTGAAGACGGGTATGGCC    | 61.41 | 204 | 56/32 |
| 205 | TSRF219 | ** | EST/cDNA | L68 | EY651421 | EST/cDNA | (caa)n       | F9GAC | ctagatcaggacgacGTGATGAGAGGACTGTCG        | 61.62 | gtttttt | gttttttGTGTCCTCCATCAACGCG      | 61.62 | 267 | 56/32 |
| 206 | TSRF225 | *  | EST/cDNA | L64 | EY741460 | EST/cDNA | (cag)n       | F9AGG | ctagatattaggacagcGTTCTCCATCCCAACAC       | 60.65 | gtttttt | gttttttTCGCGATAGCCTAATCAGG     | 60.65 | 151 | 54/32 |
| 207 | TSRF229 | *  | EST/cDNA | --  | PC913104 | EST/cDNA | (cag)n       | F9TAC | ctagatcaggactacAAAGATTCACCAACCTCTCC      | 61.10 | gtttttt | gttttttCACTGCTGATGATGAGGACG    | 61.10 | 289 | 56/32 |
| 208 | TSRF230 | *  | EST/cDNA | L68 | CB293840 | EST/cDNA | (cag)n       | F9GTC | ctagataggagcgtcGTAAGATCCTTCCACACCTC      | 60.91 | gtttttt | gttttttGAAAGCTGTGTTGTGCTCACC   | 60.91 | 230 | 60/32 |
| 209 | TSRF234 | ** | EST/cDNA | L68 | CB293840 | EST/cDNA | (cag)n       | F9CCG | ctagatattaggacccgATAAGTGGGAGTGGAGTTC     | 61.47 | gtt     | gttTCTTGTCTGCTGATATGG          | 61.47 | 203 | 60/32 |
| 210 | TSRF237 | *  | EST/cDNA | --  | DC886823 | EST/cDNA | (ctcggg)n    | F9GTC | ctagataggagcgtcAACCAATACCCACAGAAAC       | 61.21 | gtttttt | gttttttCTAATGGGCTTTGGAGATGG    | 61.21 | 186 | 54/32 |
| 211 | TSRF238 | *  | EST/cDNA | --  | EY770405 | EST/cDNA | (caggtt)n    | F9GCC | ctagatattaggacccgATCCGGCTCCCTGAAAAGAG    | 60.85 | gtttttt | gttttttGCATTAACAGGCTCTTCTCTC   | 60.85 | 183 | 54/32 |
| 212 | TSRN214 | *  | EST/cDNA | L62 | DY271862 | EST/cDNA | (can)n       | F9TCC | ctagatcaggactccCGCAACAGAGGATAAACAGAC     | 60.62 | gtttttt | gttttttTCTTCTTAAACAGGCTCTTCTG  | 59.94 | 145 | 60/32 |
| 213 | TSRP06  | *  | EST/cDNA | L66 | DY281841 | EST/cDNA | (gaa)n       | F9GAC | ctagatcaggacgacAACAGCAAAACAGCAAA         | 61.94 | gtttttt | gttttttCAAGTACATGAACAGCCAC     | 59.40 | 208 | 60/32 |
| 214 | TSRP07  | *  | EST/cDNA | L62 | EY812469 | EST/cDNA | (agj)n       | F9GTC | ctagataggagcgtcATCCAACTTATATTTGCTCAT     | 58.29 | gtttttt | gttttttTGACCTATCATGAAGACACA    | 59.63 | 161 | 60/32 |

B. SSR markers used in this study

| #   | Marker   | Cert. | Reference | LG  | Accession ID | Tag   | Tagged forward primer                    | tail    | Failed reverse primer           | Amp | Program |
|-----|----------|-------|-----------|-----|--------------|-------|------------------------------------------|---------|---------------------------------|-----|---------|
| 215 | C1BE0246 | *     | 1)        | L65 | ET089421     | F9GCC | ctagatattaggacccgATTGGTGTGTGTTGAGGTTG    | gtttttt | gttttttCGTGACAGAGATGATGTT       | 233 | 56/32   |
| 216 | C1BE0447 | *     | 1)        | L66 | ET091388     | F9CCG | ctagatattaggacccgCACAAAGAGGATACCCACAA    | gtttttt | gttttttCGTCAAGAGAGGAGATGATG     | 326 | 56/32   |
| 217 | C1BE1644 | *     | 1)        | L63 | ET097780     | F9GCC | ctagatattaggacccgACAGAAGAGGAGCCATATTT    | gtttttt | gttttttTCAGAGAGAACCCGAGAAAG     | 383 | 56/32   |
| 218 | C1BE2165 | *     | 1)        | L67 | ET102021     | F9GTC | ctagatcaggagcgtcAATCACTCTCAACACCCAG      | gtttttt | gttttttTAATGCAAAATAACTACCATTC   | 286 | 56/32   |
| 219 | C1BE2227 | *     | 1)        | L68 | ET100673     | F9TAC | ctagatcaggactacAGAAACCAAGTCACTCACAG      | gtttttt | gttttttTAGAGAAGGATGAGGATGAGG    | 176 | 54/32   |
| 220 | C1BE4265 | *     | 1)        | L62 | ET106965     | F9AGG | ctagatattaggacagcACACTGCTAAACCGACAC      | gtttttt | gttttttTACTACTCAACAGCAACAGGAA   | 254 | 56/32   |
| 221 | CX0004   | *     | 2)        | L65 | CK933007     | F9CCG | ctagatattaggacccgAAACCCCACTTCAAGCAAC     | gtttttt | gttttttGAAAGGAGGCTTTGATGTC      | 276 | 56/30   |
| 222 | CX0010   | *     | 2)        | L61 | BQ623170     | F9TAC | ctagatcaggactacAACCGAAGTGAAGGAACT        | gtttttt | gttttttACATTCATGGCCACATCTCA     | 228 | 58/32   |
| 223 | CX0035   | *     | 2)        | L63 | CD575772     | F9GTC | ctagataggagcgtcCACTTAACAGAAACCAAAACA     | gtttttt | gttttttCAAAAAGGGGTGCAAAAGAA     | 189 | 56/34   |
| 224 | CX2004   | *     | 2)        | L62 | CF653229     | F9CCG | ctagatattaggacccgAAACCGCCGAAACTTTTACA    | gtttttt | gttttttGGAAATCCCAAGAAAGTTGG     | 202 | 56/32   |
| 225 | CX2018   | *     | 2)        | L62 | CF507198     | F9GTC | ctagataggagcgtcAAGAGATCGAAAGGCAAGAGA     | gtttttt | gttttttTTGAGATTGATGTGAGCCG      | 179 | 56/32   |
| 226 | CX2021   | *     | 2)        | L62 | CK739933     | F9TAC | ctagatcaggactacAAGTCACTGCTTTAGCACTTTGA   | gtttttt | gttttttCAAGTTGCCAATTCAGGAGG     | 147 | 58/32   |
| 227 | CX2040   | *     | 2)        | L63 | CK932713     | F9CCG | ctagatattaggacccgACAGCTCCCACTTTCTTT      | gtttttt | gttttttGATGATGTTTTCCTGTCGCG     | 112 | 56/32   |
| 228 | CX3001   | *     | 2)        | L63 | CO913029     | F9GAC | ctagatcaggacgacAAACAACTCTTCAAGAGGCG      | gtttttt | gttttttGAGACTCAACCAAGCAACCA     | 432 | 56/32   |
| 229 | CX3040   | *     | 2)        | L69 | CNI90783     | F9TCC | ctagatcaggactccAAGCGATGCAACAGATACCC      | gtttttt | gttttttCAGCAGCAACAGCTCTTCA      | 308 | 60/32   |
| 230 | CX4005   | *     | 2)        | L63 | CK938465     | F9AGG | ctagatattaggacagcACACCAAACTTGGCCCTC      | gtttttt | gttttttTGAAGATGGATGTCGGTATA     | 372 | 54/34   |
| 231 | CX4008   | *     | 2)        | L64 | CK933430     | F9GAC | ctagatcaggacgacACCTCACTCACCACACTCC       | gtttttt | gttttttTGAGGCTAGGCACTGGTTT      | 394 | 58/32   |
| 232 | CX4040   | *     | 2)        | L62 | CF834831     | F9TAC | ctagatcaggactacGAAAGAGGCAAGAATACCG       | gtttttt | gttttttTGCACTTCTCATGCCAAAATA    | 368 | 56/32   |
| 233 | CX5022   | **    | 2)        | L67 | CD574077     | F9TAC | ctagatcaggactacCTCTCGATCCACTGCAAAACA     | gtttttt | gttttttTAGCCAGCCAAAGCAACTTAA    | 255 | 56/32   |
| 234 | CX5039   | *     | 2)        | L67 | CF833361     | F9AGG | ctagatattaggacagcTCCGCAATAATTTCAATTTATTA | gtttttt | gttttttTCGATGAATTCGGAGGATC      | 443 | 56/32   |
| 235 | CX6024   | *     | 2)        | L66 | CE9505       | F9AGG | ctagatattaggacagcAGGCTGCTCTTCTCTCTC      | gtttttt | gttttttTCTCGGATTTGTGAGTTTG      | 203 | 56/32   |
| 236 | CX6035   | *     | 2)        | L67 | CD573989     | F9GTC | ctagataggagcgtcCTTGGCCAGGGTCTCACTCTC     | gtttttt | gttttttCTCGGACTCAGGTTACCAT      | 258 | 56/32   |
| 237 | CX6037   | *     | 2)        | L67 | DR909803     | F9TAC | ctagatcaggactacGAAAGGGAATGATGGCAACA      | gtttttt | gttttttTGTCTTCAACCCCTCTCCAT     | 177 | 58/32   |
| 238 | CX6F21   | *     | 2)        | L61 | DN621499     | F9GAC | ctagatcaggacgacTACAAGTTCGCCAGTTATCCCG    | gtttttt | gttttttTACTTGACCCGCTTAGGAGTGAC  | 163 | 58/32   |
| 239 | CX6F32   | *     | 2)        | L65 | CF506971     | F9TAC | ctagatcaggactacACCCCTCTTGTGGCAGTCTTT     | gtttttt | gttttttACAAAAGAAAGGAGTTGACCGGTA | 166 | 56/32   |
| 240 | F02      | *     | 3)        | L65 | BQ623425     | F9TAC | ctagatcaggactacAAACAGTGTAGCTGCACTTTTCAAC | gtttttt | gttttttGATCAAGAGGACTTGGCCATCTC  | 178 | 56/32   |
| 241 | F03      | **    | 3)        | L65 | CK912164     | F9AGG | ctagatattaggacccgCAGGATGAGGATGAAAGA      | gtttttt | gttttttCTGTGCTGATTTCTTCTCAC     | 146 | 54/32   |
| 242 | F16      | **    | 3)        | L63 | DR909803     | F9GAC | ctagatcaggacgacGCTTCAACCTCTCCATCTTCTCTC  | gtttttt | gttttttGGGACTTATGGCAACATTAACGCA | 172 | 52/34   |
| 243 | F21      | *     | 3)        | L61 | DN621499     | F9GTC | ctagataggagcgtcCTCAAGATTCGCCAGTTATCCCG   | gtttttt | gttttttTACTTGACCCGCTTAGGAGTGAC  | 163 | 52/34   |
| 244 | F40      | *     | 3)        | L67 | CV716690     | F9GCC | ctagatattaggacccgTGTGTTTACAGAGGCAAGCAAG  | gtttttt | gttttttCTGCAAGGAGCTTCTTACTCAA   | 104 | 56/32   |
| 245 | F50      | *     | 3)        | L64 | CNI83579     | F9GAC | ctagatcaggacgacAGGACGATTTCAAGTTCAGACTTG  | gtttttt | gttttttTGACAAAATCGAAGAGATCAAGC  | 165 | 54/34   |
| 246 | F79      | *     | 3)        | L62 | BQ624534     | F9GCC | ctagatattaggacccgCTGGCTGCAAGACTTCTGTGTAG | gtttttt | gttttttATAGATGTGGCAAGCAGAGCAAG  | 176 | 58/32   |

Cert: certified markers by error check with trio sets. \*) certified and used for genetic analysis. \*\*) certified, but rejected from genetic analysis due to overlap to other certified marker. No symbol: not certified due to error on certain trio.  
Category: gSSR - designed from genomic SSR, EST/cDNA - designed from public EST or cDNA sequence. INDEL: genomic indel.  
LG: Linkage group of this marker on one or two cross population(s).  
Source:  
Tag: type of BS tag (Shimizu and Yano, 2012).  
Tail: pig tail sequence (xxxx).  
Amp: amplicon size with tag sequence.  
Program: anneal temperature/PCR cycles

- Reference:
- Ollitrault, F. et al. (2010) Am. J. Bot. e124-e129.
  - Chen, C. et al. (2008) Tree Genet. Genom. 4: 1-10.
  - Chen, C. et al. (2006) Tree Appl Genet. 112:1248-1257.
