# Supplementary material for: Hybrid Origins of Citrus Varieties Inferred from DNA Marker Analysis of Nuclear and Organelle Genomes
Source: PubMed Central journal article supplement (PMC5130255; doi:10.1371/journal.pone.0166969), 2016-11-30
Supplement: pone.0166969.s006.pdf [file pone.0166969.s006.pdf]

|         | 62      | 63     | 64      | 65      | 66      | 67      | 68      | 69      | 70      | 71      | 72      | 73      | 74      | 75      | 76      | 77      | 78     | 79      | 80      | 81      | 82      | 83      | 84      | 85      | 86      | 87      | 88      | 89      | 90      | 91      | 92      | 93      | 94      | 95      |         |
|---------|---------|--------|---------|---------|---------|---------|---------|---------|---------|---------|---------|---------|---------|---------|---------|---------|--------|---------|---------|---------|---------|---------|---------|---------|---------|---------|---------|---------|---------|---------|---------|---------|---------|---------|---------|
|         | NSX121  | NSX132 | NSX137  | NSX141  | NSX145  | NSX150  | NSX153  | NSX156  | NSX160  | NSX165  | NSX169  | NSX170  | NSX174  | NSX175  | NSX176  | NSX187  | SRP202 | SRP203  | SRP205  | TSRA101 | TSRA103 | TSRA107 | TSRA108 | TSRA109 | TSRA110 | TSRA117 | TSRQ222 | TSRQ264 | TSRQ265 | TSRQ271 | TSRQ282 | NSX16   | NSX27   | NSX28   |         |
| 21223   | 154/161 | 99/99  | 280/298 | 128/128 | 163/172 | 141/141 | 207/219 | 162/168 | 293/263 | 278/300 | 162/162 | 171/177 | 181/181 | 208/209 | 216/216 | 142/142 | 12/126 | 175/186 | 169/183 | 174/188 | 174/188 | 185/188 | 185/188 | 185/188 | 176/179 | 145/161 | 164/179 | 197/209 | 113/167 | 160/177 | 202/210 | 244/244 | 73/111  | 322/322 | 213/213 |
| 218/223 | 161/161 | 99/105 | 280/280 | 128/129 | 172/172 | 144/144 | 207/216 | 168/168 | 260/293 | 278/278 | 162/162 | 174/183 | 187/202 | 208/213 | 216/216 | 142/142 | 12/126 | 175/186 | 169/183 | 174/188 | 184/198 | 185/188 | 185/188 | 176/179 | 145/161 | 164/179 | 197/209 | 113/167 | 160/177 | 202/210 | 244/244 | 73/111  | 322/322 | 213/213 |         |
| 219/223 | 154/154 | 99/99  | 280/298 | 128/138 | 163/172 | 141/141 | 207/216 | 162/168 | 293/263 | 278/300 | 162/162 | 177/183 | 187/202 | 208/213 | 216/216 | 142/142 | 12/126 | 175/186 | 169/183 | 174/188 | 184/198 | 185/188 | 185/188 | 176/179 | 145/161 | 161/179 | 197/209 | 113/113 | 180/187 | 202/208 | 250/250 | 111/111 | 312/322 | 209/232 |         |
| 218/218 | 161/161 | 99/99  | 280/280 | 128/138 | 172/172 | 141/144 | 207/216 | 162/168 | 260/296 | 278/278 | 162/162 | 174/177 | 189/199 | 213/222 | 216/216 | 142/142 | 12/121 | 175/175 | 169/169 | 174/178 | 184/184 | 185/188 | 185/188 | 176/176 | 145/145 | 164/167 | 209/209 | 113/113 | 177/177 | 208/210 | 244/244 | 73/111  | 319/321 | 209/209 |         |
| 219/219 | 154/154 | 99/99  | 280/280 | 128/128 | 172/172 | 141/141 | 207/216 | 162/168 | 260/296 | 278/278 | 162/162 | 177/183 | 189/199 | 213/222 | 216/216 | 142/142 | 12/126 | 175/186 | 169/183 | 174/188 | 184/198 | 185/188 | 185/188 | 176/176 | 145/145 | 164/167 | 209/209 | 113/113 | 177/177 | 208/210 | 244/244 | 73/111  | 319/321 | 209/209 |         |
| 208/218 | 154/154 | 99/99  | 280/298 | 128/138 | 163/172 | 141/141 | 212/212 | 168/168 | 293/293 | 285/297 | 162/162 | 183/183 | 208/211 | 208/208 | 216/216 | 130/142 | 12/126 | 175/186 | 165/183 | 184/192 | 174/198 | 185/188 | 185/188 | 179/179 | 145/176 | 160/163 | 164/197 | 193/137 | 163/186 | 202/210 | 251/251 | 111/111 | 315/318 | 230/232 |         |
| 212/218 | 154/161 | 99/105 | 280/298 | 128/128 | 163/172 | 138/141 | 207/216 | 162/168 | 293/293 | 278/300 | 162/171 | 183/183 | 187/208 | 208/209 | 216/216 | 130/142 | 12/126 | 175/186 | 165/183 | 184/188 | 184/198 | 185/188 | 185/188 | 179/179 | 152/161 | 161/170 | 164/197 | 113/137 | 163/186 | 202/202 | 250/250 | 111/111 | 315/322 | 232/232 |         |
| 210/220 | 154/161 | 99/105 | 280/298 | 128/128 | 163/172 | 138/147 | 207/216 | 156/168 | 293/293 | 278/282 | 162/165 | 171/183 | 187/202 | 208/223 | 214/216 | 130/142 | 12/126 | 175/177 | 183/183 | 174/188 | 184/192 | 182/185 | 185/188 | 179/179 | 152/161 | 169/170 | 197/209 | 113/134 | 173/180 | 202/202 | 250/251 | 111/111 | 315/322 | 232/232 |         |
| 210/210 | 161/161 | 99/99  | 280/298 | 128/138 | 172/172 | 141/141 | 207/216 | 168/168 | 293/293 | 285/297 | 162/162 | 183/183 | 208/211 | 208/208 | 216/216 | 130/142 | 12/126 | 175/186 | 165/183 | 184/192 | 174/198 | 185/188 | 185/188 | 179/179 | 145/176 | 160/163 | 164/197 | 113/137 | 163/186 | 202/202 | 250/251 | 111/111 | 315/318 | 230/232 |         |
| 210/210 | 161/161 | 99/99  | 280/298 | 128/138 | 172/172 | 141/141 | 204/216 | 168/168 | 293/293 | 285/297 | 162/162 | 183/183 | 208/211 | 208/208 | 216/216 | 130/142 | 12/126 | 175/186 | 165/183 | 184/192 | 174/198 | 185/188 | 185/188 | 179/179 | 145/176 | 160/163 | 164/197 | 113/137 | 163/186 | 202/202 | 250/251 | 111/111 | 315/318 | 230/232 |         |
| 210/210 | 161/161 | 99/99  | 280/298 | 128/138 | 172/172 | 141/141 | 204/216 | 168/168 | 293/293 | 285/297 | 162/162 | 183/183 | 208/211 | 208/208 | 216/216 | 130/142 | 12/126 | 175/186 | 165/183 | 184/192 | 174/198 | 185/188 | 185/188 | 179/179 | 145/176 | 160/163 | 164/197 | 113/137 | 163/186 | 202/202 | 250/251 | 111/111 | 315/318 | 230/232 |         |
| 210/210 | 161/161 | 99/99  | 280/298 | 128/138 | 172/172 | 141/141 | 204/216 | 168/168 | 293/293 | 285/297 | 162/162 | 183/183 | 208/211 | 208/208 | 216/216 | 130/142 | 12/126 | 175/186 | 165/183 | 184/192 | 174/198 | 185/188 | 185/188 | 179/179 | 145/176 | 160/163 | 164/197 | 113/137 | 163/186 | 202/202 | 250/251 | 111/111 | 315/318 | 230/232 |         |
| 208/218 | 154/161 | 99/99  | 280/298 | 128/128 | 163/172 | 141/144 | 207/219 | 156/162 | 293/293 | 278/286 | 162/182 | 183/183 | 187/199 | 210/218 | 216/216 | 130/142 | 12/126 | 175/186 | 165/183 | 184/192 | 184/198 | 185/185 | 185/185 | 176/179 | 145/161 | 160/164 | 164/209 | 113/128 | 165/180 | 202/208 | 256/256 | 111/111 | 317/322 | 230/232 |         |
| 208/220 | 161/161 | 99/99  | 298/298 | 128/128 | 163/172 | 141/141 | 204/216 | 168/168 | 293/293 | 300/300 | 178/182 | 174/177 | 208/241 | 208/208 | 216/216 | 142/142 | 12/126 | 180/186 | 165/183 | 177/184 | 184/198 | 173/185 | 176/179 | 152/161 | 160/160 | 164/197 | 113/130 | 180/186 | 202/202 | 250/252 | 111/111 | 315/316 | 230/232 |         |         |
| 212/220 | 161/161 | 99/99  | 298/298 | 128/128 | 163/172 | 141/141 | 204/216 | 168/168 | 293/293 | 300/300 | 178/182 | 174/177 | 208/241 | 208/208 | 216/216 | 142/142 | 12/126 | 180/186 | 165/183 | 177/184 | 184/198 | 173/185 | 176/179 | 152/161 | 160/160 | 164/197 | 113/130 | 180/186 | 202/202 | 250/252 | 111/111 | 315/316 | 230/232 |         |         |
| 212/220 | 154/154 | 99/99  | 298/298 | 128/138 | 163/172 | 141/147 | 219/219 | 156/168 | 293/293 | 300/300 | 185/171 | 177/183 | 188/208 | 208/210 | 216/216 | 130/142 | 12/126 | 175/186 | 168/186 | 183/183 | 188/192 | 192/198 | 182/185 | 179/179 | 152/160 | 160/162 | 197/197 | 128/137 | 163/165 | 202/202 | 251/251 | 111/111 | 315/317 | 230/232 |         |
| 212/218 | 154/161 | 99/105 | 298/298 | 128/128 | 163/163 | 141/141 | 207/219 | 156/162 | 293/293 | 275/292 | 162/165 | 171/177 | 187/208 | 210/218 | 216/216 | 142/142 | 12/126 | 180/186 | 165/183 | 188/211 | 192/192 | 185/195 | 176/179 | 152/161 | 161/163 | 164/197 | 113/128 | 165/183 | 202/202 | 251/256 | 111/111 | 315/317 | 230/232 |         |         |
| 208/218 | 161/161 | 99/99  | 280/301 | 128/129 | 172/172 | 141/144 | 207/216 | 162/168 | 293/293 | 278/282 | 171/171 | 183/183 | 187/211 | 208/218 | 216/216 | 142/142 | 12/126 | 175/186 | 169/183 | 174/188 | 188/198 | 185/185 | 179/179 | 152/161 | 161/169 | 197/213 | 113/113 | 180/186 | 202/202 | 250/250 | 111/111 | 315/321 | 209/232 |         |         |
| 208/218 | 161/161 | 99/99  | 280/301 | 128/128 | 172/172 | 141/141 | 207/216 | 162/168 | 293/293 | 278/282 | 171/171 | 183/183 | 187/211 | 208/218 | 216/216 | 142/142 | 12/126 | 175/186 | 169/183 | 174/188 | 188/198 | 185/185 | 179/179 | 152/161 | 161/169 | 197/213 | 113/113 | 180/186 | 202/202 | 250/250 | 111/111 | 315/321 | 209/232 |         |         |
| 210/220 | 154/154 | 99/105 | 298/298 | 138/138 | 163/163 | 141/141 | 216/219 | 156/168 | 293/293 | 278/300 | 162/165 | 171/177 | 187/205 | 208/210 | 216/216 | 142/142 | 12/126 | 180/186 | 165/183 | 177/188 | 192/198 | 185/195 | 179/185 | 152/161 | 169/170 | 164/197 | 113/128 | 165/186 | 202/202 | 251/256 | 111/111 | 317/321 | 211/230 |         |         |
| 210/220 | 161/161 | 99/99  | 280/280 | 128/128 | 172/172 | 141/144 | 204/207 | 162/168 | 293/293 | 278/300 | 162/182 | 174/183 | 187/202 | 218/218 | 216/216 | 142/142 | 12/126 | 175/186 | 169/183 | 174/188 | 184/198 | 188/188 | 176/176 | 145/161 | 160/173 | 197/213 | 113/113 | 177/180 | 202/210 | 250/250 | 111/111 | 315/321 | 209/232 |         |         |
| 210/223 | 161/161 | 99/99  | 280/280 | 128/128 | 172/172 | 141/144 | 204/207 | 162/168 | 293/293 | 278/300 | 162/182 | 174/183 | 187/202 | 218/218 | 216/216 | 142/142 | 12/126 | 175/186 | 169/183 | 174/188 | 184/198 | 188/188 | 176/176 | 145/161 | 160/173 | 197/213 | 113/113 | 177/180 | 202/210 | 250/250 | 111/111 | 315/321 | 209/232 |         |         |
| 210/223 | 161/161 | 99/99  | 280/280 | 128/128 | 172/172 | 141/144 | 204/207 | 162/168 | 293/293 | 278/300 | 162/182 | 174/183 | 187/202 | 218/218 | 216/216 | 142/142 | 12/126 | 175/186 | 169/183 | 174/188 | 184/198 | 188/188 | 176/176 | 145/161 | 160/173 | 197/213 | 113/113 | 177/180 | 202/210 | 250/250 | 111/111 | 315/321 | 209/232 |         |         |
| 210/220 | 154/168 | 99/105 | 280/298 | 128/128 | 163/163 | 141/141 | 219/219 | 156/168 | 293/293 | 290/300 | 153/165 | 171/180 | 187/202 | 210/225 | 216/216 | 111/142 | 12/126 | 180/180 | nd      | 185/200 | 184/184 | 185/185 | 185/185 | 176/176 | 145/161 | 161/174 | 174/174 | 164/164 | 113/128 | 165/186 | 202/202 | 256/256 | 111/111 | 317/321 | 230/230 |
| 212/218 | 161/161 | 99/105 | 280/298 | 128/128 | 172/172 | 138/144 | 207/216 | 162/168 | 293/296 | 278/300 | 162/171 | 174/183 | 187/202 | 209/213 | 216/216 | 142/142 | 12/126 | 175/186 | 169/183 | 174/188 | 184/198 | 185/188 | 176/179 | 145/161 | 161/179 | 197/213 | 113/113 | 177/186 | 202/210 | 250/250 | 111/111 | 315/319 | 209/232 |         |         |
| 218/218 | 154/168 | 99/105 | 280/298 | 128/128 | 163/172 | 138/141 | 216/219 | 156/168 | 293/293 | 300/316 | 153/171 | 180/183 | 187/202 | 208/216 | 216/216 | 130/142 | 12/126 | 175/186 | 174/183 | 185/188 | 192/198 | 179/185 |         |         |         |         |         |         |         |         |         |         |         |         |         |





|         |         |        |         |         |         |         |         |         |         |         |         |         |         |         |         |         |         |         |         |         |         |         |         |         |         |         |         |         |         |         |         |         |         |
|---------|---------|--------|---------|---------|---------|---------|---------|---------|---------|---------|---------|---------|---------|---------|---------|---------|---------|---------|---------|---------|---------|---------|---------|---------|---------|---------|---------|---------|---------|---------|---------|---------|---------|
| 210/212 | 161/161 | 99/99  | 280/298 | 128/128 | 172/172 | 141/144 | 204/216 | 162/168 | 293/293 | 285/300 | 171/179 | 183/183 | 208/208 | 208/218 | 216/216 | 130/142 | 121/121 | 175/175 | 183/183 | 192/192 | 174/198 | 185/188 | 176/176 | 145/152 | 160/160 | 197/197 | 119/130 | 180/180 | 202/202 | 251/252 | 111/111 | 315/322 | 232/232 |
| 210/212 | 161/161 | 99/105 | 280/298 | 128/138 | 172/172 | 141/144 | 204/219 | 168/168 | 293/293 | 297/300 | 162/182 | 174/183 | 187/187 | 208/208 | 216/216 | 130/142 | 121/126 | 175/186 | 183/183 | 188/192 | 174/198 | 185/188 | 176/179 | 145/161 | 160/161 | 197/197 | 113/137 | 163/186 | 202/202 | 251/251 | 111/111 | 318/322 | 232/232 |
| 210/212 | 161/161 | 99/105 | 280/298 | 128/138 | 163/172 | 141/141 | 216/219 | 162/168 | 293/293 | 278/300 | 182/182 | 177/183 | 202/208 | 208/218 | 216/216 | 111/142 | 121/126 | 175/186 | 183/183 | 177/188 | 198/198 | 185/185 | 179/179 | 145/145 | 160/160 | 197/197 | 113/137 | 163/177 | 202/202 | 250/251 | 111/111 | 315/322 | 232/232 |
| 208/210 | 154/161 | 99/99  | 280/298 | 128/138 | 163/172 | 141/141 | 204/216 | 168/168 | 293/293 | 278/285 | 162/171 | 171/183 | 187/187 | 208/208 | 216/216 | 130/142 | 121/126 | 175/186 | 165/183 | 184/188 | 198/198 | 188/188 | 176/179 | 152/161 | 161/163 | 164/197 | 113/119 | 180/186 | 202/202 | 251/252 | 111/111 | 316/318 | 232/232 |
| 210/212 | 161/161 | 99/99  | 298/298 | 128/128 | 172/172 | 141/141 | 204/216 | 168/168 | 293/296 | 278/285 | 178/182 | 183/183 | 187/211 | 208/208 | 216/216 | 142/142 | 126/126 | 186/186 | 165/183 | 184/188 | 198/198 | 173/188 | 176/179 | 152/161 | 160/161 | 197/197 | 119/137 | 163/180 | 202/202 | 250/252 | 111/111 | 316/322 | 230/232 |
| 210/212 | 161/161 | 99/99  | 280/298 | 128/128 | 172/172 | 141/141 | 216/219 | 162/168 | 293/296 | 285/300 | 171/179 | 177/183 | 187/208 | 208/218 | 216/216 | 142/142 | 121/126 | 175/186 | 165/183 | 184/192 | 198/198 | 185/185 | 176/179 | 160/161 | 164/197 | 113/137 | 163/186 | 202/202 | 250/252 | 111/111 | 315/315 | 232/232 |         |
| 210/212 | 161/161 | 99/105 | 280/298 | 128/138 | 163/172 | 141/141 | 204/219 | 168/168 | 293/293 | 297/300 | 162/182 | 174/183 | 187/187 | 208/208 | 216/216 | 130/142 | 121/126 | 175/186 | 183/183 | 188/192 | 174/198 | 185/188 | 176/179 | 145/161 | 160/160 | 197/197 | 113/137 | 163/186 | 202/202 | 250/251 | 111/111 | 315/322 | 232/232 |
| 210/212 | 161/161 | 99/99  | 298/298 | 128/128 | 172/172 | 141/141 | 204/219 | 162/168 | 293/296 | 285/300 | 162/171 | 183/183 | 187/216 | 208/218 | 216/216 | 130/142 | 126/126 | 186/186 | 165/183 | 188/192 | 198/198 | 185/188 | 176/179 | 160/175 | 160/163 | 197/197 | 134/137 | 163/172 | 202/202 | 251/251 | 111/111 | 315/316 | 230/232 |
| 208/210 | 161/161 | 99/105 | 280/298 | 128/138 | 163/172 | 141/141 | 204/219 | 168/168 | 293/293 | 297/300 | 182/182 | 183/183 | 187/211 | 208/218 | 216/216 | 130/142 | 121/126 | 175/186 | 183/183 | 188/192 | 174/198 | 185/188 | 176/179 | 160/175 | 160/160 | 197/197 | 113/137 | 163/186 | 202/202 | 250/251 | 111/111 | 315/318 | 232/232 |
| 210/212 | 161/161 | 99/105 | 280/298 | 128/138 | 163/172 | 141/141 | 204/219 | 168/168 | 293/293 | 297/300 | 162/182 | 183/183 | 187/211 | 208/218 | 216/216 | 142/142 | 121/126 | 175/186 | 169/183 | 184/192 | 174/198 | 185/188 | 176/179 | 145/175 | 160/161 | 197/197 | 113/137 | 163/186 | 202/202 | 250/251 | 111/111 | 315/322 | 232/232 |
| 210/212 | 161/161 | 99/105 | 280/298 | 128/138 | 163/172 | 141/141 | 204/219 | 168/168 | 293/293 | 285/300 | 171/182 | 183/183 | 187/208 | 208/218 | 216/216 | 142/142 | 121/126 | 175/186 | 165/183 | 188/192 | 174/198 | 185/185 | 179/179 | 145/180 | 160/161 | 197/197 | 113/137 | 163/177 | 202/202 | 250/250 | 111/111 | 315/322 | 232/232 |
| 208/210 | 161/161 | 99/105 | 298/298 | 128/138 | 163/172 | 141/141 | 204/207 | 168/168 | 293/293 | 278/297 | 182/182 | 183/183 | 187/211 | 208/208 | 216/216 | 142/142 | 121/126 | 175/186 | 165/183 | 184/188 | 184/188 | 185/185 | 179/179 | 160/175 | 160/160 | 197/197 | 113/137 | 163/186 | 202/202 | 250/250 | 111/111 | 318/322 | 232/232 |
| 210/212 | 161/161 | 99/105 | 280/298 | 128/128 | 172/172 | 138/141 | 204/204 | 168/168 | 293/293 | 278/300 | 162/179 | 183/183 | 187/211 | 208/208 | 216/216 | 142/142 | 126/126 | 186/186 | 165/183 | 188/192 | 174/198 | 173/188 | 176/176 | 145/161 | 160/163 | 197/197 | 113/137 | 163/186 | 202/202 | 250/251 | 111/111 | 315/322 | 232/232 |
| 210/220 | 161/161 | 99/99  | 280/298 | 128/138 | 172/172 | 138/141 | 204/204 | 168/168 | 293/293 | 278/300 | 162/182 | 183/183 | 187/211 | 208/208 | 216/216 | 142/142 | 121/121 | 175/175 | 169/183 | 174/192 | 174/198 | 185/188 | 176/179 | 145/145 | 160/164 | 197/197 | 113/130 | 180/186 | 202/202 | 250/250 | 111/111 | 315/322 | 232/232 |
| 210/212 | 161/161 | 99/105 | 280/298 | 128/138 | 163/172 | 141/141 | 204/219 | 168/168 | 293/293 | 285/300 | 171/182 | 183/183 | 211/211 | 208/208 | 216/216 | 142/142 | 121/126 | 175/186 | 169/183 | 184/192 | 174/198 | 185/188 | 176/179 | 145/175 | 160/161 | 197/197 | 113/130 | 180/186 | 202/202 | 250/251 | 111/111 | 315/322 | 232/232 |
| 208/210 | 161/161 | 99/99  | 298/298 | 128/128 | 163/172 | 141/141 | 204/219 | 168/168 | 293/296 | 278/300 | 171/182 | 183/183 | 187/208 | 208/208 | 216/216 | 142/142 | 121/126 | 175/186 | 165/183 | 188/192 | 174/198 | 185/185 | 179/179 | 145/180 | 160/161 | 197/197 | 113/137 | 163/177 | 202/202 | 250/250 | 111/111 | 315/322 | 232/232 |
| 208/210 | 161/161 | 99/105 | 298/298 | 128/138 | 172/172 | 138/141 | 204/204 | 168/168 | 293/293 | 278/300 | 162/171 | 183/183 | 187/202 | 208/210 | 216/216 | 142/142 | 121/126 | 175/186 | 165/183 | 184/192 | 174/198 | 185/188 | 176/176 | 145/161 | 162/163 | 164/197 | 113/113 | 180/186 | 202/202 | 251/251 | 111/111 | 315/319 | 213/232 |
| 218/220 | 161/161 | 99/99  | 298/298 | 128/128 | 163/172 | 141/144 | 207/216 | 168/168 | 293/296 | 278/300 | 171/179 | 177/183 | 202/235 | 208/213 | 216/216 | 142/142 | 126/126 | 186/186 | 169/183 | 174/177 | 184/198 | 185/185 | 176/179 | 145/161 | 160/161 | 197/197 | 113/113 | 177/186 | 202/202 | 250/250 | 111/111 | 315/319 | 209/232 |
| 210/220 | 161/161 | 99/99  | 280/298 | 128/128 | 163/172 | 141/141 | 204/204 | 162/168 | 293/293 | 285/300 | 162/182 | 174/183 | 208/235 | 208/218 | 216/216 | 130/142 | 121/126 | 175/186 | 165/183 | 184/192 | 174/198 | 185/188 | 176/179 | 145/161 | 160/160 | 164/197 | 113/137 | 163/177 | 202/202 | 250/250 | 111/111 | 315/315 | 230/232 |
| 210/212 | 161/161 | 99/105 | 280/298 | 128/128 | 163/172 | 141/141 | 204/219 | 168/168 | 293/296 | 278/297 | 162/171 | 171/183 | 187/202 | 208/208 | 216/216 | 142/142 | 121/126 | 175/186 | 165/183 | 184/188 | 174/184 | 182/188 | 176/176 | 145/161 | 161/163 | 164/197 | 113/128 | 165/186 | 202/202 | 250/250 | 73/111  | 318/318 | 213/232 |
| 208/210 | 161/161 | 99/105 | 298/298 | 128/138 | 163/172 | 141/141 | 204/219 | 168/168 | 293/293 | 278/300 | 162/171 | 183/183 | 187/202 | 208/210 | 216/216 | 142/142 | 121/126 | 175/186 | 165/183 | 184/192 | 174/198 | 185/188 | 176/176 | 145/161 | 162/163 | 164/197 | 113/113 | 180/186 | 202/202 | 251/251 | 73/111  | 315/319 | 213/232 |
| 218/220 | 161/161 | 99/99  | 298/298 | 128/128 | 163/172 | 141/144 | 207/216 | 168/168 | 293/296 | 278/300 | 171/179 | 177/183 | 202/235 | 208/213 | 216/216 | 142/142 | 126/126 | 186/186 | 169/183 | 174/177 | 184/198 | 185/185 | 176/179 | 145/161 | 160/161 | 197/197 | 113/113 | 177/186 | 202/202 | 250/250 | 111/111 | 315/319 | 209/232 |
| 210/220 | 161/161 | 99/99  | 280/298 | 128/128 | 163/172 | 141/141 | 204/204 | 162/168 | 293/293 | 285/300 | 162/182 | 174/183 | 208/235 | 208/218 | 216/216 | 130/142 | 121/126 | 175/186 | 165/183 | 184/192 | 174/198 | 185/188 | 176/179 | 145/161 | 160/160 | 164/197 | 113/137 | 163/177 | 202/202 | 250/250 | 111/111 | 315/315 | 230/232 |
| 212/218 | 161/161 | 99/105 | 280/298 | 128/128 | 172/172 | 138/144 | 207/219 | 168/168 | 293/296 | 278/278 | 171/182 | 183/183 | 187/187 | 208/213 | 216/216 | 142/142 | 126/126 | 186/186 | 183/183 | 188/188 | 184/198 | 185/185 | 179/179 | 145/145 | 160/161 | 197/197 | 113/137 | 163/186 | 202/210 | 251/251 | 111/111 | 319/322 | 209/232 |
| 212/220 | 161/161 | 99/99  | 280/298 | 128/128 | 163/172 | 141/141 | 204/207 | 162/162 | 293/293 | 300/300 | 178/182 | 174/177 | 187/241 | 208/218 | 216/216 | 142/142 | 126/126 | 186/186 | 183/183 | 177/188 | 174/184 | 185/188 | 176/179 | 145/161 | 160/160 | 197/197 | 113/113 | 177/177 | 202/208 | 252/252 | 111/111 | 315/315 | 232/232 |
| 212/218 | 161/161 | 99/99  | 280/298 | 128/128 | 163/172 | 141/144 | 204/219 | 162/168 | 293/296 | 278/300 | 162/171 | 174/183 | 187/241 | 208/209 | 216/216 | 142/142 | 126/126 | 186/186 | 183/183 | 188/188 | 184/198 | 185/188 | 176/176 | 145/161 | 161/161 | 197/197 | 113/113 | 177/186 | 202/202 | 251/251 | 111/111 | 315/319 | 209/232 |
| 212/220 | 161/161 | 99/99  | 298/298 | 128/128 | 163/172 | 138/141 | 204/207 | 168/168 | 293/293 | 278/300 | 171/179 | 174/174 | 202/208 | 208/213 | 216/216 | 142/142 | 126/126 | 186/186 | 169/183 | 174/177 | 184/198 | 173/185 | 176/179 | 161/161 | 160/161 | 164/213 | 113/113 | 188/186 | 202/202 | 250/252 | 111/111 | 315/316 | 232/232 |
| 212/218 | 161/161 | 99/105 | 280/298 | 128/128 | 172/172 | 141/144 | 207/207 | 162/162 | 293/293 | 278/278 | 162/171 | 174/177 | 187/202 | 209/218 | 216/216 | 142/142 | 121/126 | 175/186 | 169/183 | 174/188 | 184/184 | 185/188 | 176/176 | 145/145 | 161/179 | 197/209 | 113/113 | 177/186 | 202/210 | 244/244 | 73/111  | 319/319 | 209/213 |
| 210/212 | 161/161 | 99/105 | 280/298 | 128/128 | 172/172 | 141/144 | 204/207 | 168/168 | 293/293 | 297/300 | 162/182 | 174/183 | 187/208 | 208/213 | 216/216 | 142/142 | 121/126 | 175/186 | 165/183 | 188/188 | 184/184 | 185/188 | 176/176 | 145/161 | 160/179 | 197/213 | 113/113 | 180/186 | 202/202 | 250/250 | 111/111 | 315/318 | 232/232 |
| 208/210 | 161/161 | 99/105 | 280/298 | 128/128 | 172/172 | 141/141 | 204/216 | 168/168 | 293/293 | 278/285 | 162/182 | 183/183 | 187/208 | 208/208 | 216/216 | 142/142 | 126/126 | 186/186 | 165/183 | 184/188 | 174/198 | 188/192 | 164/176 | 152/160 | 161/163 | 197/197 | 134/137 | 163/172 | 202/202 | 250/251 | 111/111 | 315/322 | 231/232 |
| 208/210 |         |        |         |         |         |         |         |         |         |         |         |         |         |         |         |         |         |         |         |         |         |         |         |         |         |         |         |         |         |         |         |         |         |







|           |         |         |         |         |         |         |         |         |         |         |         |         |         |         |         |         |         |         |         |         |         |         |         |         |         |         |         |         |         |         |         |         |         |
|-----------|---------|---------|---------|---------|---------|---------|---------|---------|---------|---------|---------|---------|---------|---------|---------|---------|---------|---------|---------|---------|---------|---------|---------|---------|---------|---------|---------|---------|---------|---------|---------|---------|---------|
| 129/129   | 128/128 | 114/123 | 128/138 | 207/216 | 149/149 | 99/113  | 259/259 | 216/216 | 131/134 | 171/171 | 139/139 | 231/231 | 127/132 | 164/182 | 147/153 | 195/200 | 135/135 | 176/176 | 193/193 | 204/205 | 205/208 | 188/191 | 194/205 | 180/186 | 151/151 | 120/120 | 106/118 | 94/94   | 171/179 | 135/135 | 141/141 | 116/122 | 115/115 |
| 129/137   | 138/138 | 114/116 | 138/138 | 207/216 | 149/149 | 99/113  | 259/259 | 216/221 | 140/140 | 171/177 | 139/139 | 231/231 | 127/132 | 173/182 | 147/153 | 195/200 | 131/135 | 164/176 | 193/193 | 204/204 | 205/211 | 191/191 | 199/205 | 184/184 | 151/151 | 120/120 | 106/106 | 94/102  | 179/179 | 132/135 | 138/141 | 119/122 | 121/121 |
| 129/137   | 128/128 | 114/116 | 138/138 | 207/216 | 149/149 | 99/113  | 259/259 | 216/216 | 131/134 | 171/171 | 139/139 | 231/231 | 127/132 | 182/183 | 147/153 | 195/198 | 131/135 | 164/176 | 193/193 | 204/204 | 205/211 | 188/191 | 203/205 | 180/184 | 151/151 | 120/128 | 106/106 | 94/102  | 179/179 | 135/135 | 141/141 | 116/119 | 115/121 |
| 129/129   | 138/138 | 114/116 | 138/138 | 207/216 | 149/149 | 99/113  | 259/259 | 211/216 | 131/134 | 171/171 | 139/139 | 231/231 | 127/132 | 182/182 | 147/147 | 195/201 | 130/131 | 176/176 | 190/193 | 204/205 | 205/205 | 191/191 | 199/205 | 184/186 | 151/151 | 120/128 | 106/114 | 94/94   | 179/179 | 135/135 | 141/141 | 119/122 | 121/121 |
| 129/137   | 128/128 | 114/116 | 138/138 | 207/216 | 149/149 | 99/113  | 259/259 | 216/216 | 131/140 | 171/171 | 139/139 | 231/231 | 127/132 | 164/182 | 147/153 | 195/198 | 131/135 | 164/176 | 190/193 | 204/205 | 205/211 | 176/191 | 205/207 | 180/184 | 151/151 | 120/120 | 106/118 | 94/102  | 171/179 | 135/135 | 141/141 | 119/122 | 115/121 |
| 129/137   | 128/128 | 114/116 | 138/138 | 207/216 | 149/149 | 99/113  | 259/259 | 216/216 | 131/140 | 171/171 | 139/139 | 231/231 | 127/132 | 182/182 | 147/153 | 195/198 | 131/135 | 164/176 | 190/193 | 204/205 | 205/211 | 188/191 | 194/199 | 180/184 | 151/151 | 120/128 | 106/114 | 94/94   | 179/179 | 135/135 | 141/141 | 119/122 | 115/121 |
| 129/129   | 128/128 | 114/114 | 138/138 | 207/216 | 149/149 | 99/113  | 259/259 | 216/216 | 131/140 | 171/171 | 139/139 | 231/231 | 127/132 | 182/183 | 147/147 | 195/200 | 131/135 | 164/176 | 193/193 | 204/204 | 205/211 | 191/191 | 194/207 | 184/186 | 151/151 | 120/128 | 106/118 | 94/94   | 171/179 | 135/138 | 141/144 | 119/122 | 115/121 |
| 129/129   | 138/138 | 116/116 | 128/138 | 216/216 | 149/149 | 99/113  | 259/259 | 213/213 | 140/140 | 165/171 | 139/139 | 231/231 | 127/132 | 182/182 | 147/153 | 195/200 | 131/135 | 164/176 | 193/193 | 204/204 | 205/205 | 176/188 | 194/194 | 184/186 | 151/151 | 120/128 | 106/118 | 94/102  | 171/179 | 135/138 | 141/144 | 119/122 | 115/121 |
| 129/129   | 128/128 | 116/116 | 128/138 | 216/216 | 149/149 | 99/113  | 259/259 | 216/216 | 131/140 | 165/171 | 139/139 | 231/231 | 127/132 | 164/182 | 147/153 | 195/200 | 131/135 | 164/176 | 190/193 | 204/205 | 211/211 | 188/191 | 194/199 | 180/184 | 151/151 | 120/128 | 106/114 | 94/94   | 179/179 | 135/135 | 141/141 | 119/122 | 115/121 |
| 129/137   | 128/128 | 116/116 | 128/138 | 216/216 | 149/149 | 99/113  | 259/259 | 216/216 | 140/140 | 171/171 | 139/139 | 231/231 | 127/132 | 164/183 | 147/147 | 195/200 | 135/135 | 164/176 | 190/193 | 204/205 | 211/211 | 188/191 | 194/203 | 180/186 | 151/151 | 120/128 | 106/106 | 94/102  | 179/179 | 135/135 | 141/141 | 119/122 | 115/121 |
| 129/129   | 128/128 | 114/114 | 138/138 | 207/216 | 149/149 | 99/113  | 259/259 | 211/216 | 140/140 | 171/171 | 139/139 | 231/231 | 127/132 | 164/182 | 147/147 | 198/200 | 133/135 | 164/176 | 193/193 | 205/205 | 205/211 | 176/185 | 203/205 | 180/186 | 151/151 | 120/128 | 106/106 | 94/102  | 179/179 | 135/135 | 141/141 | 122/122 | 115/121 |
| 129/129   | 128/128 | 116/116 | 138/138 | 207/216 | 149/149 | 99/113  | 259/259 | 211/216 | 140/140 | 171/171 | 139/139 | 231/231 | 127/132 | 164/182 | 147/153 | 195/200 | 131/135 | 164/176 | 190/190 | 204/204 | 205/211 | 188/191 | 199/205 | 180/184 | 151/151 | 120/120 | 106/106 | 94/94   | 179/179 | 135/138 | 141/144 | 119/119 | 121/121 |
| 129/129   | 128/128 | 116/116 | 128/128 | 216/216 | 149/149 | 99/113  | 259/259 | 216/216 | 131/140 | 165/171 | 139/139 | 231/231 | 127/132 | 164/182 | 147/147 | 195/200 | 131/135 | 164/176 | 187/193 | 204/204 | 205/211 | 188/191 | 194/211 | 178/184 | 151/151 | 120/120 | 106/110 | 94/102  | 179/179 | 135/138 | 141/144 | 119/119 | 115/115 |
| 129/137   | 128/128 | 116/123 | 128/128 | 216/216 | 149/149 | 113/113 | 259/259 | 216/216 | 140/140 | 171/171 | 139/139 | 231/231 | 127/132 | 164/183 | 147/153 | 195/198 | 135/135 | 164/176 | 193/193 | 204/204 | 211/214 | 182/191 | 194/211 | 180/186 | 151/151 | 120/120 | 106/114 | 94/102  | 171/179 | 135/135 | 141/141 | 122/122 | 115/115 |
| 129/129   | 128/128 | 116/116 | 128/138 | 216/216 | 149/149 | 99/113  | 259/259 | 221/221 | 134/140 | 165/180 | 139/139 | 231/231 | 127/132 | 164/182 | 147/153 | 195/200 | 131/131 | 167/176 | 190/193 | 204/204 | 205/211 | 182/188 | 209/211 | 178/186 | 151/151 | 120/120 | 106/110 | 102/114 | 179/179 | 135/138 | 141/144 | 119/119 | 115/121 |
| 129/137   | 128/128 | 114/123 | 128/128 | 207/207 | 149/149 | 99/113  | 259/259 | 216/216 | 131/134 | 171/171 | 139/139 | 231/231 | 127/132 | 173/182 | 147/147 | 195/201 | 130/131 | 164/176 | 190/193 | 204/204 | 205/211 | 191/191 | 194/205 | 180/184 | 151/151 | 124/128 | 106/114 | 102/102 | 171/179 | 135/135 | 141/141 | 119/122 | 115/115 |
| 129/129   | 128/138 | 114/116 | 128/138 | 207/216 | 137/149 | 99/113  | 259/259 | 216/221 | 131/131 | 171/177 | 139/139 | 231/231 | 132/132 | 182/182 | 147/153 | 198/200 | 131/135 | 176/176 | 193/193 | 204/204 | 205/205 | 188/188 | 205/205 | 186/186 | 151/151 | 120/128 | 106/118 | 94/102  | 171/179 | 135/135 | 141/141 | 119/122 | 115/121 |
| 129/137   | 138/138 | 114/116 | 138/138 | 207/216 | 149/149 | 99/113  | 259/259 | 216/221 | 140/140 | 171/177 | 139/139 | 231/231 | 127/132 | 182/183 | 147/153 | 198/198 | 131/135 | 164/176 | 193/193 | 204/205 | 205/211 | 191/191 | 199/209 | 184/184 | 151/151 | 120/120 | 106/106 | 94/102  | 179/179 | 132/135 | 138/141 | 119/122 | 121/121 |
| 129/137   | 128/128 | 116/123 | 128/138 | 207/216 | 149/149 | 113/113 | 259/259 | 216/216 | 134/140 | 171/171 | 139/145 | 231/231 | 127/132 | 173/182 | 147/156 | 195/201 | 135/135 | 164/164 | 190/193 | 204/210 | 211/211 | 191/191 | 194/199 | 180/184 | 151/151 | 120/120 | 106/114 | 94/102  | 171/179 | 135/135 | 141/141 | 122/122 | 121/121 |
| 129/129   | 128/128 | 114/116 | 128/138 | 207/216 | 137/149 | 99/113  | 259/259 | 216/216 | 131/134 | 171/177 | 139/145 | 231/231 | 127/132 | 164/182 | 147/153 | 195/195 | 131/135 | 164/176 | 190/190 | 204/211 | 205/205 | 191/191 | 199/205 | 184/186 | 151/151 | 120/128 | 106/118 | 102/102 | 171/179 | 132/135 | 138/141 | 122/131 | 115/121 |
| 137/137   | 128/128 | 114/123 | 128/138 | 207/216 | 149/149 | 113/113 | 259/259 | 216/216 | 134/140 | 171/177 | 139/139 | 231/231 | 127/132 | 182/182 | 147/156 | 198/201 | 135/135 | 164/164 | 190/190 | 204/204 | 205/211 | 191/191 | 194/199 | 180/184 | 151/151 | 120/120 | 106/114 | 102/102 | 171/179 | 132/135 | 138/141 | 122/122 | 115/121 |
| 129/137   | 128/128 | 116/123 | 128/138 | 207/216 | 149/149 | 99/113  | 259/259 | 216/216 | 131/134 | 171/177 | 139/139 | 231/231 | 127/132 | 182/182 | 147/147 | 195/198 | 130/131 | 164/176 | 193/193 | 204/204 | 205/211 | 191/191 | 199/205 | 180/186 | 151/151 | 120/124 | 106/114 | 102/102 | 171/179 | 135/135 | 141/141 | 119/122 | 115/121 |
| 129/137   | 128/128 | 116/123 | 128/138 | 207/216 | 149/149 | 113/113 | 259/259 | 216/216 | 134/137 | 174/177 | 139/145 | 219/231 | 127/132 | 164/182 | 147/156 | 201/204 | 130/135 | 164/164 | 190/193 | 204/210 | 205/211 | 191/191 | 199/211 | 180/184 | 151/151 | 120/124 | 114/122 | 102/102 | 171/171 | 132/135 | 138/141 | 122/122 | 115/121 |
| 129/137   | 128/128 | 114/116 | 128/138 | 207/216 | 149/149 | 99/113  | 259/259 | 216/216 | 134/140 | 171/177 | 139/139 | 219/231 | 127/132 | 173/182 | 147/153 | 198/200 | 135/135 | 164/176 | 193/193 | 204/204 | 211/211 | 188/191 | 194/199 | 180/184 | 151/151 | 120/120 | 106/114 | 102/114 | 171/179 | 132/135 | 138/141 | 122/131 | 115/121 |
| 129/129   | 128/128 | 123/123 | 128/138 | 216/216 | 149/149 | 99/113  | 259/259 | 221/221 | 131/134 | 171/171 | 139/139 | 222/231 | 127/127 | 182/183 | 147/153 | 198/200 | 133/135 | 176/176 | 190/193 | 205/205 | 205/211 | 182/188 | 194/199 | 184/186 | 151/151 | 120/120 | 106/114 | 94/94   | 179/179 | 135/138 | 141/144 | 119/122 | 115/121 |
| 129/129   | 128/128 | 116/123 | 128/138 | 216/216 | 149/149 | 99/113  | 259/259 | 216/216 | 140/140 | 165/171 | 139/139 | 231/231 | 127/132 | 164/183 | 147/147 | 195/200 | 131/135 | 164/176 | 190/190 | 204/205 | 211/211 | 188/191 | 194/203 | 180/186 | 151/151 | 120/128 | 106/106 | 94/102  | 179/179 | 135/135 | 141/141 | 119/119 | 115/121 |
| 129/129   | 128/128 | 116/123 | 128/138 | 216/216 | 149/149 | 99/113  | 259/259 | 216/216 | 131/140 | 171/171 | 139/139 | 231/231 | 127/132 | 182/182 | 147/153 | 195/198 | 133/135 | 176/176 | 190/193 | 204/204 | 205/205 | 182/188 | 194/199 | 180/186 | 151/151 | 120/120 | 106/118 | 94/102  | 171/179 | 135/135 | 141/141 | 119/122 | 121/121 |
| 129/129   | 128/128 | 116/123 | 128/138 | 207/216 | 149/149 | 99/113  | 259/259 | 221/221 | 131/140 | 171/171 | 139/139 | 231/231 | 127/132 | 182/182 | 147/147 | 198/200 | 133/135 | 176/176 | 193/193 | 204/205 | 205/211 | 182/188 | 194/199 | 180/186 | 151/151 | 120/128 | 106/118 | 94/102  | 171/179 | 135/135 | 141/141 | 122/131 | 115/121 |
| 129/129   | 128/138 | 116/116 | 128/138 | 207/216 | 149/149 | 113/113 | 259/259 | 216/216 | 134/140 | 171/171 | 139/139 | 231/231 | 127/132 | 182/182 | 147/147 | 195/200 | 135/135 | 164/164 | 190/193 | 205/205 | 205/211 | 176/191 | 199/203 | 180/186 | 151/151 | 120/120 | 106/118 | 94/102  | 179/179 | 135/135 | 141/141 | 122/131 | 115/121 |
| 129/129   | 128/128 | 116/116 | 128/138 | 207/216 | 149/149 | 99/113  | 259/259 | 216/216 | 140/140 | 171/171 | 139/139 | 231/231 | 127/132 | 182/182 | 147/153 | 195/200 | 131/135 | 164/176 | 190/193 | 204/204 | 205/205 | 188/191 | 194/199 | 180/186 | 151/151 | 120/120 | 106/118 | 94/94   | 179/179 | 135/135 | 141/141 | 122/131 | 115/121 |
| 129/129</ |         |         |         |         |         |         |         |         |         |         |         |         |         |         |         |         |         |         |         |         |         |         |         |         |         |         |         |         |         |         |         |         |         |



| 130      | 131      | 132      | 133      | 134      | 135      | 136      | 137      | 138      | 139      | 140      | 141      | 142      | 143      | 144      | 145      | 146      | 147      | 148      | 149      | 150      | 151      | 152      | 153      | 154 | 155 | 156 | 157 | 158 | 159 | 160 | 161 | 162 | 163 |     |     |     |     |     |     |     |     |     |     |     |     |     |     |     |     |     |     |     |     |     |     |     |     |     |     |     |     |     |     |     |     |     |     |     |     |     |     |     |     |     |     |     |     |     |     |     |     |     |     |     |     |     |     |     |     |     |     |     |     |     |     |     |     |     |     |     |     |     |     |     |     |     |     |     |     |     |     |     |     |     |     |     |     |     |     |     |     |     |     |     |     |     |     |     |     |     |     |     |     |     |     |     |     |     |     |     |     |     |     |     |     |     |     |     |     |     |     |     |     |     |     |     |     |     |     |     |     |     |     |     |     |     |     |     |     |     |     |     |     |     |     |     |     |     |     |     |     |     |     |     |     |     |     |     |     |     |     |     |     |     |     |     |     |     |     |     |     |     |     |     |     |     |     |     |     |     |     |     |     |     |     |     |     |     |     |     |     |     |     |     |     |     |     |     |     |     |     |     |     |     |     |     |     |     |     |     |     |     |     |     |     |     |     |     |     |
|----------|----------|----------|----------|----------|----------|----------|----------|----------|----------|----------|----------|----------|----------|----------|----------|----------|----------|----------|----------|----------|----------|----------|----------|-----|-----|-----|-----|-----|-----|-----|-----|-----|-----|-----|-----|-----|-----|-----|-----|-----|-----|-----|-----|-----|-----|-----|-----|-----|-----|-----|-----|-----|-----|-----|-----|-----|-----|-----|-----|-----|-----|-----|-----|-----|-----|-----|-----|-----|-----|-----|-----|-----|-----|-----|-----|-----|-----|-----|-----|-----|-----|-----|-----|-----|-----|-----|-----|-----|-----|-----|-----|-----|-----|-----|-----|-----|-----|-----|-----|-----|-----|-----|-----|-----|-----|-----|-----|-----|-----|-----|-----|-----|-----|-----|-----|-----|-----|-----|-----|-----|-----|-----|-----|-----|-----|-----|-----|-----|-----|-----|-----|-----|-----|-----|-----|-----|-----|-----|-----|-----|-----|-----|-----|-----|-----|-----|-----|-----|-----|-----|-----|-----|-----|-----|-----|-----|-----|-----|-----|-----|-----|-----|-----|-----|-----|-----|-----|-----|-----|-----|-----|-----|-----|-----|-----|-----|-----|-----|-----|-----|-----|-----|-----|-----|-----|-----|-----|-----|-----|-----|-----|-----|-----|-----|-----|-----|-----|-----|-----|-----|-----|-----|-----|-----|-----|-----|-----|-----|-----|-----|-----|-----|-----|-----|-----|-----|-----|-----|-----|-----|-----|-----|-----|-----|-----|-----|-----|-----|-----|-----|-----|-----|-----|-----|-----|-----|-----|-----|-----|-----|-----|-----|-----|-----|-----|-----|-----|-----|-----|
| SSR08B13 | SSR08B15 | SSR08B21 | SSR08B22 | SSR08B27 | SSR08B30 | SSR08B31 | SSR08B32 | SSR08B33 | SSR08B38 | SSR08B44 | SSR08B47 | SSR08B60 | SSR08B64 | SSR08B66 | SSR08B68 | SSR08B78 | SSR08B82 | SSR08B86 | SSR08B88 | SSR08B95 | SSR11A06 | SSR11B14 | SSR11A27 |     |     |     |     |     |     |     |     |     |     |     |     |     |     |     |     |     |     |     |     |     |     |     |     |     |     |     |     |     |     |     |     |     |     |     |     |     |     |     |     |     |     |     |     |     |     |     |     |     |     |     |     |     |     |     |     |     |     |     |     |     |     |     |     |     |     |     |     |     |     |     |     |     |     |     |     |     |     |     |     |     |     |     |     |     |     |     |     |     |     |     |     |     |     |     |     |     |     |     |     |     |     |     |     |     |     |     |     |     |     |     |     |     |     |     |     |     |     |     |     |     |     |     |     |     |     |     |     |     |     |     |     |     |     |     |     |     |     |     |     |     |     |     |     |     |     |     |     |     |     |     |     |     |     |     |     |     |     |     |     |     |     |     |     |     |     |     |     |     |     |     |     |     |     |     |     |     |     |     |     |     |     |     |     |     |     |     |     |     |     |     |     |     |     |     |     |     |     |     |     |     |     |     |     |     |     |     |     |     |     |     |     |     |     |     |     |     |     |     |     |     |     |     |     |     |     |
| 109      | 12       | 112      | 121      | 128      | 141      | 147      | 149      | 151      | 154      | 161      | 162      | 163      | 164      | 165      | 166      | 167      | 168      | 169      | 170      | 171      | 172      | 173      | 174      | 175 | 176 | 177 | 178 | 179 | 180 | 181 | 182 | 183 | 184 | 185 | 186 | 187 | 188 | 189 | 190 | 191 | 192 | 193 | 194 | 195 | 196 | 197 | 198 | 199 | 200 | 201 | 202 | 203 | 204 | 205 | 206 | 207 | 208 | 209 | 210 | 211 | 212 | 213 | 214 | 215 | 216 | 217 | 218 | 219 | 220 | 221 | 222 | 223 | 224 | 225 | 226 | 227 | 228 | 229 | 230 | 231 | 232 | 233 | 234 | 235 | 236 | 237 | 238 | 239 | 240 | 241 | 242 | 243 | 244 | 245 | 246 | 247 | 248 | 249 | 250 | 251 | 252 | 253 | 254 | 255 | 256 | 257 | 258 | 259 | 260 | 261 | 262 | 263 | 264 | 265 | 266 | 267 | 268 | 269 | 270 | 271 | 272 | 273 | 274 | 275 | 276 | 277 | 278 | 279 | 280 | 281 | 282 | 283 | 284 | 285 | 286 | 287 | 288 | 289 | 290 | 291 | 292 | 293 | 294 | 295 | 296 | 297 | 298 | 299 | 300 | 301 | 302 | 303 | 304 | 305 | 306 | 307 | 308 | 309 | 310 | 311 | 312 | 313 | 314 | 315 | 316 | 317 | 318 | 319 | 320 | 321 | 322 | 323 | 324 | 325 | 326 | 327 | 328 | 329 | 330 | 331 | 332 | 333 | 334 | 335 | 336 | 337 | 338 | 339 | 340 | 341 | 342 | 343 | 344 | 345 | 346 | 347 | 348 | 349 | 350 | 351 | 352 | 353 | 354 | 355 | 356 | 357 | 358 | 359 | 360 | 361 | 362 | 363 | 364 | 365 | 366 | 367 | 368 | 369 | 370 | 371 | 372 | 373 | 374 | 375 | 376 | 377 | 378 | 379 | 380 | 381 | 382 | 383 | 384 | 385 | 386 | 387 | 388 | 389 | 390 | 391 | 392 | 393 | 394 | 395 | 396 | 397 | 398 | 399 | 400 |























|           |         |         |         |         |         |         |         |         |         |         |         |         |         |         |         |         |         |         |         |         |         |         |         |         |         |         |         |         |         |         |         |         |         |
|-----------|---------|---------|---------|---------|---------|---------|---------|---------|---------|---------|---------|---------|---------|---------|---------|---------|---------|---------|---------|---------|---------|---------|---------|---------|---------|---------|---------|---------|---------|---------|---------|---------|---------|
| 163/169   | 146/165 | 203/206 | 206/206 | 229/234 | 238/243 | 196/202 | 259/262 | 147/149 | 283/283 | 212/224 | 184/195 | 183/183 | 177/177 | 143/143 | 202/202 | 159/159 | 233/236 | 309/328 | 366/384 | 285/298 | 160/170 | 249/249 | 273/273 | 219/219 | 175/175 | 199/202 | 168/174 | 147/149 | 110/110 | 420/423 | 455/464 | 368/368 | 382/382 |
| 163/169   | 165/165 | 203/206 | 206/206 | 229/234 | 238/243 | 196/196 | 262/268 | 147/149 | 283/283 | 212/224 | 184/195 | 183/183 | 177/177 | 143/143 | 202/204 | 159/187 | 233/233 | 328/328 | 366/378 | 281/287 | 160/170 | 249/249 | 273/276 | 228/228 | 175/184 | 206/206 | 174/174 | 145/149 | 110/110 | 417/420 | 455/464 | 368/372 | 393/402 |
| 163/169   | 165/165 | 203/206 | 206/206 | 229/234 | 238/243 | 196/202 | 262/268 | 147/149 | 283/283 | 212/224 | 184/195 | 183/183 | 177/177 | 143/143 | 202/204 | 159/159 | 233/233 | 328/328 | 366/366 | 287/287 | 160/170 | 249/249 | 273/276 | 219/228 | 175/184 | 199/199 | 168/174 | 149/149 | 110/118 | 420/423 | 455/464 | 368/372 | 382/390 |
| 163/163   | 165/165 | 203/206 | 206/206 | 229/229 | 238/243 | 196/202 | 262/268 | 147/149 | 283/283 | 212/224 | 184/195 | 183/183 | 177/177 | 140/143 | 202/204 | 159/187 | 233/236 | 309/309 | 366/384 | 287/287 | 160/160 | 249/249 | 273/276 | 228/228 | nd.     | 202/206 | 170/174 | 145/147 | 110/110 | 417/423 | 458/464 | 368/368 | 382/390 |
| 163/169   | 165/165 | 203/206 | 206/206 | 229/229 | 238/243 | 196/196 | 262/268 | 149/149 | 278/283 | 212/224 | 184/195 | 183/183 | 177/177 | 140/143 | 202/202 | 159/159 | 233/236 | 309/328 | 366/378 | 287/287 | 160/160 | 249/249 | 261/276 | 219/228 | 184/184 | 196/202 | 174/174 | 147/149 | 110/112 | 420/423 | 455/457 | 368/372 | 382/382 |
| 169/169   | 146/165 | 203/206 | 206/206 | 229/229 | 238/243 | 196/196 | 262/268 | 149/149 | 283/283 | 212/224 | 184/184 | 183/183 | 177/177 | 143/143 | 202/202 | 187/187 | 233/233 | 309/328 | 366/378 | 287/287 | 160/160 | 249/249 | 273/276 | 219/219 | 175/175 | 202/206 | 157/174 | 147/149 | 110/112 | 423/423 | 464/464 | 368/372 | 382/382 |
| 163/163   | 165/165 | 206/206 | 206/206 | 229/229 | 238/243 | 196/202 | 262/262 | 149/149 | 283/283 | 212/224 | 184/195 | 183/183 | 177/177 | 143/143 | 202/202 | 159/187 | 233/233 | 309/328 | 366/366 | 287/287 | 160/160 | 249/249 | 273/273 | 219/228 | 184/184 | 202/206 | 157/174 | 147/147 | 110/118 | 420/423 | 464/464 | 368/368 | 382/382 |
| 169/169   | 165/165 | 203/206 | 206/206 | 229/229 | 238/243 | 196/196 | 262/262 | 147/149 | 283/283 | 212/224 | 184/195 | 183/183 | 177/177 | 140/143 | 202/202 | 159/159 | 233/236 | 309/328 | 366/384 | 287/287 | 160/170 | 249/249 | 273/273 | 228/228 | 175/175 | 202/206 | 157/174 | 147/149 | 110/110 | 423/423 | 455/455 | 368/372 | 382/382 |
| 163/169   | 165/165 | 206/206 | 206/206 | 229/229 | 238/243 | 196/202 | 262/268 | 147/149 | 283/283 | 212/224 | 184/195 | 183/183 | 177/177 | 140/143 | 202/202 | 159/187 | 233/236 | 328/328 | 366/366 | 287/288 | 160/160 | 249/249 | 273/276 | 219/219 | 175/184 | 206/206 | 157/174 | 145/147 | 110/110 | 417/423 | 455/464 | 368/372 | 382/390 |
| 163/169   | 165/165 | 206/206 | 206/206 | 229/229 | 238/243 | 196/202 | 262/268 | 147/149 | 283/283 | 212/224 | 184/195 | 183/183 | 177/177 | 143/143 | 202/204 | 159/159 | 233/236 | 309/328 | 366/366 | 281/287 | 160/170 | 249/249 | 251/273 | 216/219 | 175/184 | 206/206 | 174/174 | 147/149 | 110/112 | 420/423 | 458/464 | 368/372 | 382/390 |
| 163/169   | 165/165 | 206/206 | 206/206 | 229/229 | 238/243 | 196/196 | 262/268 | 149/149 | 278/283 | 212/224 | 184/195 | 183/183 | 177/177 | 143/143 | 202/202 | 159/187 | 233/233 | 328/328 | 366/366 | 281/288 | 160/170 | 249/249 | 273/276 | 219/228 | 184/184 | 206/206 | 174/174 | 145/149 | 110/118 | 417/417 | 458/464 | 368/372 | 382/382 |
| 163/169   | 165/165 | 203/203 | 206/212 | 229/234 | 238/243 | 196/196 | 262/268 | 147/149 | 283/283 | 212/224 | 184/195 | 183/183 | 177/177 | 143/143 | 202/202 | 159/187 | 233/233 | 309/328 | 366/366 | 287/284 | 160/170 | 249/249 | 273/276 | 219/228 | 175/184 | 196/202 | 174/174 | 145/149 | 110/118 | 420/423 | 457/464 | 368/372 | 382/382 |
| 163/169   | 165/165 | 203/206 | 212/212 | 234/234 | 238/243 | 202/202 | 262/262 | 147/149 | 281/283 | 212/212 | 184/184 | 183/183 | 177/177 | 143/143 | 202/202 | 159/187 | 233/236 | 309/328 | 366/378 | 281/287 | 170/170 | 249/249 | 273/276 | 216/219 | 175/184 | 206/206 | 174/174 | 145/147 | 110/110 | 420/423 | 455/464 | 368/372 | 393/390 |
| 163/169   | 165/165 | 206/206 | 206/212 | 229/234 | 238/243 | 196/202 | 262/268 | 147/149 | 283/283 | 212/224 | 184/195 | 183/183 | 177/177 | 143/143 | 202/204 | 159/159 | 233/236 | 309/328 | 366/366 | 281/287 | 160/170 | 249/249 | 251/273 | 216/219 | 175/184 | 206/206 | 174/174 | 147/149 | 110/112 | 420/423 | 458/464 | 368/372 | 382/390 |
| 163/169   | 165/165 | 206/206 | 206/212 | 229/234 | 238/243 | 196/202 | 262/262 | 149/149 | 278/283 | 212/224 | 184/195 | 183/183 | 177/177 | 143/143 | 202/202 | 159/187 | 233/233 | 328/328 | 366/366 | 281/288 | 160/170 | 249/249 | 273/276 | 219/228 | 184/184 | 206/206 | 174/174 | 145/149 | 110/112 | 420/423 | 455/458 | 368/372 | 382/382 |
| 163/163   | 165/165 | 203/206 | 206/212 | 229/234 | 238/243 | 196/196 | 262/268 | 149/149 | 278/283 | 212/224 | 184/195 | 183/183 | 177/177 | 140/143 | 202/202 | 159/187 | 233/236 | 309/325 | nd.     | 281/287 | 160/170 | 249/249 | 273/273 | 219/228 | 175/184 | 202/206 | 174/174 | 145/149 | 110/110 | 417/420 | 457/458 | 368/368 | 382/390 |
| 163/163   | 165/165 | 203/206 | 206/206 | 229/229 | 238/243 | 196/196 | 262/262 | 149/149 | 283/283 | 212/212 | nd.     | 183/183 | 177/177 | 143/143 | 202/202 | 159/159 | 233/233 | 328/328 | 366/366 | 287/288 | 160/170 | 249/249 | 273/273 | 219/228 | 175/184 | 206/206 | 174/174 | 147/149 | 112/118 | 417/420 | 455/464 | 368/368 | 382/390 |
| 163/169   | 165/165 | 203/203 | 206/212 | 229/234 | 238/243 | 196/202 | 262/268 | 147/149 | 283/283 | 224/224 | 195/195 | 183/183 | 177/177 | 125/143 | 202/202 | 159/187 | 236/236 | 328/328 | 366/366 | 281/287 | 167/170 | 249/253 | 273/276 | 219/219 | 175/184 | 206/214 | 170/174 | 145/151 | 110/126 | 417/417 | 455/457 | 368/368 | 382/382 |
| 163/169   | 165/165 | 206/206 | 206/212 | 229/234 | 238/243 | 196/202 | 262/262 | 147/149 | 283/283 | 212/224 | 184/195 | 183/183 | 177/177 | 143/143 | 202/202 | 187/187 | 233/233 | 328/328 | 366/366 | 281/288 | 160/167 | 249/249 | 273/276 | 219/228 | 175/184 | 196/206 | 174/181 | 145/147 | 110/126 | 417/423 | 455/464 | 368/368 | 382/390 |
| 163/169   | 165/165 | 203/203 | 206/212 | 229/234 | 238/243 | 196/202 | 259/262 | 147/147 | 283/283 | 212/212 | 184/184 | 183/183 | 177/177 | 125/143 | 202/202 | 187/187 | 233/236 | 319/328 | 366/366 | 281/287 | 167/170 | 249/249 | 273/276 | 219/228 | 175/184 | 206/214 | 170/174 | 145/147 | 110/118 | 417/423 | 455/464 | 368/372 | 390/402 |
| 163/169   | 165/165 | 203/206 | 206/206 | 229/234 | 238/243 | 196/196 | 259/262 | 149/149 | 283/283 | 212/224 | 184/195 | 183/183 | 177/177 | 143/143 | 202/202 | 187/187 | 233/233 | 309/328 | 366/378 | 281/284 | 160/170 | 249/249 | 273/276 | 219/219 | 175/184 | 196/208 | 168/181 | 149/149 | 106/112 | 423/423 | 455/455 | 368/372 | 382/382 |
| 163/169   | 165/165 | 203/206 | 206/206 | 229/234 | 238/243 | 196/196 | 262/262 | 147/149 | 283/283 | 212/224 | 184/184 | 183/183 | 177/177 | 143/143 | 202/204 | 159/159 | 233/233 | 309/309 | 366/366 | 287/287 | 160/170 | 249/249 | 273/273 | 219/219 | 175/175 | 202/206 | 168/174 | 147/149 | 110/110 | 417/423 | 455/464 | 368/372 | 382/390 |
| 163/169   | 165/165 | 206/206 | 206/212 | 229/234 | 238/243 | 196/196 | 262/268 | 147/149 | 278/283 | 212/224 | 184/195 | 183/183 | 177/177 | 143/143 | 202/202 | 159/187 | 233/233 | 319/328 | 366/378 | 281/288 | 170/170 | 249/249 | 273/276 | 228/228 | 175/184 | 206/206 | 174/174 | 145/149 | 110/112 | 417/423 | 455/464 | 368/372 | 382/402 |
| 163/169   | 165/165 | 206/206 | 206/206 | 229/234 | 238/243 | 196/196 | 259/268 | 149/149 | 281/283 | 224/224 | 195/195 | 177/183 | 177/177 | 143/143 | 202/204 | 159/187 | 233/233 | 328/328 | 366/378 | 281/298 | 160/170 | 249/249 | 273/273 | 219/219 | 175/184 | 196/206 | 174/181 | 147/149 | 110/118 | 420/426 | 452/455 | 368/372 | 382/402 |
| 163/169   | 146/165 | 206/206 | 206/212 | 234/234 | 238/243 | 196/196 | 259/262 | 147/149 | 281/283 | 212/224 | 184/195 | 177/183 | 177/177 | 143/143 | 202/204 | 159/159 | 233/233 | 309/309 | 366/378 | 281/287 | 160/170 | 241/249 | 273/273 | 219/228 | 175/184 | 196/206 | 168/174 | 149/149 | 106/112 | 423/423 | 455/464 | 368/372 | 382/390 |
| 163/169   | 165/165 | 206/206 | 206/206 | 229/234 | 238/243 | 196/196 | 262/268 | 147/149 | 283/283 | 212/224 | 184/195 | 177/183 | 177/177 | 143/143 | 202/204 | 187/187 | 233/233 | 312/328 | 366/378 | 281/298 | 160/170 | 241/249 | 273/276 | 228/228 | 175/184 | 199/206 | 174/177 | 145/147 | 110/110 | 423/423 | 455/455 | 368/372 | 382/402 |
| 163/169   | 165/165 | 203/206 | 206/212 | 234/234 | 238/238 | 196/202 | 259/268 | 147/147 | 278/283 | 224/224 | 195/195 | 177/177 | 177/177 | 143/143 | 202/204 | 187/187 | 236/236 | 309/328 | 366/378 | 281/281 | 160/170 | 230/249 | 273/273 | 216/228 | 184/184 | 196/203 | 157/181 | 147/147 | 100/110 | 417/426 | 455/455 | 368/368 | 390/402 |
| 163/169   | 165/165 | 206/206 | 206/206 | 229/234 | 238/243 | 196/202 | 262/268 | 147/149 | 283/283 | 212/224 | 184/195 | 183/183 | 177/177 | 143/143 | 202/204 | 187/187 | 233/236 | 328/328 | 366/378 | 281/287 | 160/170 | 249/249 | 273/273 | 219/228 | 175/184 | 196/203 | 157/181 | 147/147 | 100/110 | 417/426 | 455/464 | 368/368 | 382/402 |
| 163/163   | 165/165 | 206/206 | 206/206 | 229/234 | 238/243 | 196/202 | 262/268 | 147/149 | 283/283 | 212/224 | 184/195 | 183/183 | 177/177 | 143/143 | 202/204 | 187/187 | 233/236 | 328/328 | 366/378 | 281/287 | 160/170 | 249/249 | 273/276 | 219/228 | 175/184 | 206/206 | 174/174 | 145/149 | 110/118 | 420/426 | 457/464 | 368/368 | 382/382 |
| 163/163   | 165/165 | 203/206 | 206/212 | 229/234 | 238/243 | 196/202 | 262/268 | 147/149 | 283/283 | 212/224 | 184/195 | 183/183 | 177/177 | 143/143 | 202/202 | 159/187 | 233/236 | 328/328 | 366/366 | 281/288 | 160/170 | 249/249 | 273/276 | 219/219 | 175/175 | 202/206 | 157/174 | 147/149 | 110/118 | 420/426 | 457/464 | 368/372 | 382/382 |
| 163/169</ |         |         |         |         |         |         |         |         |         |         |         |         |         |         |         |         |         |         |         |         |         |         |         |         |         |         |         |         |         |         |         |         |         |
