# Supplementary material for: Hybrid Origins of Citrus Varieties Inferred from DNA Marker Analysis of Nuclear and Organelle Genomes
Source: PubMed Central journal article supplement (PMC5130255; doi:10.1371/journal.pone.0166969), 2016-11-30
Supplement: pone.0166969.s007.pdf [file pone.0166969.s007.pdf]

**S4 Table. Summary of DNA marker inconsistency for known parent-offspring trios**

| #  | Marker name | Synthetic varieties |                | Selected lines    |                | Selection |
|----|-------------|---------------------|----------------|-------------------|----------------|-----------|
|    |             | Inconsisted trios   | ND in data set | Inconsisted trios | ND in data set |           |
| 1  | CTVR01      | 0                   | 0              | 0                 | 0              | *         |
| 2  | CTVR04      | 0                   | 0              | 0                 | 0              | **        |
| 3  | CUBER403    | 5                   | 5              | 2                 | 0              |           |
| 4  | CUBER410    | 0                   | 0              | 0                 | 0              | *         |
| 5  | CUBER601    | 7                   | 0              | 2                 | 0              |           |
| 6  | CUBER602    | 0                   | 0              | 0                 | 0              | **        |
| 7  | CUBER903    | 8                   | 0              | 17                | 0              |           |
| 8  | CUBER918    | 0                   | 0              | 0                 | 0              | *         |
| 9  | CUBER920    | 0                   | 0              | 0                 | 0              | *         |
| 10 | CUBER925    | 2                   | 2              | 5                 | 5              |           |
| 11 | CUBER935    | 0                   | 0              | 0                 | 0              | **        |
| 12 | CUBER939    | 0                   | 0              | 0                 | 0              | *         |
| 13 | CUBER951    | 0                   | 0              | 1                 | 1              | *         |
| 14 | GRW2011     | 0                   | 0              | 0                 | 0              | *         |
| 15 | GRW2051     | 1                   | 0              | 1                 | 0              |           |
| 16 | GRW3021     | 9                   | 0              | 8                 | 0              |           |
| 17 | GRW3011     | 0                   | 0              | 0                 | 0              | *         |
| 18 | GSR10S09    | 0                   | 0              | 0                 | 0              | *         |
| 19 | GSR10S17    | 0                   | 0              | 0                 | 0              | *         |
| 20 | GSR10S29    | 0                   | 0              | 0                 | 0              | *         |
| 21 | GSR2101     | 0                   | 0              | 0                 | 0              |           |
| 22 | GSR2103     | 0                   | 0              | 0                 | 0              |           |
| 23 | GSR2108     | 0                   | 0              | 0                 | 0              |           |
| 24 | GSR2129     | 0                   | 0              | 0                 | 0              |           |
| 25 | GSR2131     | 0                   | 0              | 1                 | 1              |           |
| 26 | GSR2150     | 16                  | 0              | 16                | 0              |           |
| 27 | GSR3114     | 4                   | 0              | 10                | 0              |           |
| 28 | GSR3121     | 0                   | 0              | 0                 | 0              | *         |
| 29 | GSR3126     | 5                   | 2              | 2                 | 1              |           |
| 30 | GSR3128     | 0                   | 0              | 0                 | 0              | *         |
| 31 | GSR3136     | 0                   | 0              | 0                 | 0              | *         |
| 32 | GSR3137     | 1                   | 0              | 1                 | 1              |           |
| 33 | GSR3138     | 0                   | 0              | 1                 | 1              | *         |
| 34 | GSR3140     | 0                   | 0              | 0                 | 0              | *         |
| 35 | GSR3141     | 10                  | 2              | 7                 | 1              |           |
| 36 | GSR5105     | 2                   | 0              | 6                 | 0              |           |
| 37 | GSR5112     | 2                   | 1              | 2                 | 0              |           |
| 38 | GSR5114     | 2                   | 0              | 2                 | 1              |           |
| 39 | GSR5122     | 1                   | 0              | 0                 | 0              |           |
| 40 | GSR5127     | 4                   | 6              | 6                 | 5              |           |
| 41 | GSR5129     | 1                   | 0              | 1                 | 0              |           |
| 42 | GSR6101     | 0                   | 0              | 1                 | 1              | *         |
| 43 | GSR6122     | 0                   | 0              | 0                 | 0              | *         |
| 44 | GSR6129     | 0                   | 0              | 0                 | 0              | *         |
| 45 | GSR6133     | 0                   | 0              | 0                 | 0              | *         |
| 46 | GSR6135     | 0                   | 0              | 0                 | 0              | *         |
| 47 | NSX02       | 2                   | 0              | 0                 | 0              |           |
| 48 | NSX23       | 0                   | 0              | 0                 | 0              | *         |
| 49 | NSX32       | 0                   | 0              | 0                 | 0              | *         |
| 50 | NSX34       | 3                   | 0              | 1                 | 0              |           |

|     |          |    |   |    |   |    |
|-----|----------|----|---|----|---|----|
| 51  | NSX38    | 0  | 0 | 0  | 0 | *  |
| 52  | NSX39    | 0  | 0 | 0  | 0 | *  |
| 53  | NSX43    | 0  | 0 | 0  | 0 | *  |
| 54  | NSX48    | 12 | 0 | 11 | 0 |    |
| 55  | NSX53    | 7  | 8 | 10 | 2 |    |
| 56  | NSX67    | 1  | 0 | 3  | 0 |    |
| 57  | NSX79    | 1  | 0 | 0  | 0 |    |
| 58  | NSX82    | 0  | 0 | 0  | 0 | *  |
| 59  | NSX84    | 0  | 0 | 0  | 0 | *  |
| 60  | NSX115   | 0  | 0 | 0  | 0 | *  |
| 61  | NSX119   | 1  | 0 | 1  | 0 |    |
| 62  | NSX121   | 0  | 0 | 0  | 0 | *  |
| 63  | NSX132   | 0  | 0 | 0  | 0 | *  |
| 64  | NSX137   | 0  | 0 | 1  | 1 | *  |
| 65  | NSX141   | 0  | 0 | 1  | 1 | *  |
| 66  | NSX145   | 0  | 0 | 1  | 1 | *  |
| 67  | NSX150   | 1  | 1 | 0  | 0 | *  |
| 68  | NSX153   | 0  | 0 | 0  | 0 | *  |
| 69  | NSX156   | 0  | 0 | 0  | 0 | *  |
| 70  | NSX160   | 0  | 0 | 0  | 0 | *  |
| 71  | NSX162   | 0  | 0 | 0  | 0 | *  |
| 72  | NSX165   | 0  | 0 | 0  | 0 | *  |
| 73  | NSX169   | 0  | 0 | 0  | 0 | *  |
| 74  | NSX170   | 0  | 0 | 0  | 0 | *  |
| 75  | NSX175   | 4  | 0 | 1  | 0 |    |
| 76  | NSX186   | 1  | 0 | 0  | 0 |    |
| 77  | NSX187   | 0  | 0 | 0  | 0 | *  |
| 78  | SRPE02   | 0  | 0 | 0  | 0 | *  |
| 79  | SRPE03   | 1  | 0 | 0  | 0 |    |
| 80  | SRPE05   | 0  | 0 | 0  | 0 | *  |
| 81  | TSRA101  | 0  | 0 | 0  | 0 | *  |
| 82  | TSRA103  | 0  | 0 | 0  | 0 | *  |
| 83  | TSRA107  | 0  | 0 | 1  | 0 |    |
| 84  | TSRA108  | 3  | 1 | 1  | 1 |    |
| 85  | TSRA109  | 1  | 0 | 0  | 0 |    |
| 86  | TSRA110  | 0  | 0 | 0  | 0 | *  |
| 87  | TSRA117  | 0  | 0 | 0  | 0 | *  |
| 88  | TSGR222  | 1  | 0 | 0  | 0 |    |
| 89  | TSGR264  | 0  | 0 | 0  | 0 | *  |
| 90  | TSGR265  | 0  | 0 | 0  | 0 | ** |
| 91  | TSGR271  | 0  | 0 | 0  | 0 | *  |
| 92  | TSGR282  | 6  | 0 | 8  | 1 |    |
| 93  | NSX16    | 1  | 0 | 0  | 0 |    |
| 94  | NSX27    | 0  | 0 | 0  | 0 |    |
| 95  | NSX28    | 3  | 0 | 0  | 0 |    |
| 96  | NSX70    | 0  | 0 | 0  | 0 | *  |
| 97  | NSX87    | 10 | 9 | 10 | 2 |    |
| 98  | NSX94    | 6  | 0 | 10 | 0 |    |
| 99  | NSX118   | 0  | 0 | 0  | 0 | *  |
| 100 | NSX129   | 0  | 0 | 4  | 0 |    |
| 101 | NSX148   | 2  | 0 | 0  | 0 |    |
| 102 | NSX161   | 0  | 0 | 0  | 0 | *  |
| 103 | NSX179   | 0  | 0 | 1  | 0 |    |
| 104 | TSA10A29 | 20 | 2 | 28 | 1 |    |
| 105 | SSR07A05 | 0  | 0 | 0  | 0 | *  |
| 106 | SSR07A07 | 0  | 0 | 0  | 0 | *  |
| 107 | SSR07A14 | 0  | 0 | 0  | 0 | *  |

|     |          |    |   |    |   |    |
|-----|----------|----|---|----|---|----|
| 108 | SSR07A17 | 5  | 0 | 1  | 0 |    |
| 109 | SSR07A19 | 0  | 0 | 1  | 1 | *  |
| 110 | SSR07A23 | 0  | 0 | 0  | 0 | *  |
| 111 | SSR07A24 | 0  | 0 | 0  | 0 | *  |
| 112 | SSR07A20 | 0  | 0 | 0  | 0 | *  |
| 113 | SSR07B01 | 1  | 1 | 0  | 0 | *  |
| 114 | SSR07B05 | 6  | 0 | 3  | 0 |    |
| 115 | SSR07B08 | 1  | 1 | 0  | 0 | *  |
| 116 | SSR07B09 | 2  | 0 | 1  | 0 |    |
| 117 | SSR07B14 | 0  | 0 | 0  | 0 | *  |
| 118 | SSR07B27 | 0  | 0 | 0  | 0 | *  |
| 119 | SSR07B25 | 2  | 1 | 0  | 0 |    |
| 120 | SSR07B30 | 5  | 0 | 3  | 0 |    |
| 121 | SSR08A02 | 0  | 0 | 0  | 0 | *  |
| 122 | SSR08A06 | 0  | 0 | 0  | 0 | *  |
| 123 | SSR08A07 | 1  | 0 | 0  | 0 |    |
| 124 | SSR08A09 | 0  | 0 | 0  | 0 | *  |
| 125 | SSR08A14 | 1  | 0 | 0  | 0 |    |
| 126 | SSR08A15 | 0  | 0 | 0  | 0 | *  |
| 127 | SSR08A16 | 0  | 0 | 0  | 0 | *  |
| 128 | SSR08B02 | 14 | 1 | 31 | 0 |    |
| 129 | SSR08B06 | 0  | 0 | 0  | 0 | *  |
| 130 | SSR08B13 | 4  | 0 | 13 | 0 |    |
| 131 | SSR08B15 | 0  | 0 | 0  | 0 | *  |
| 132 | SSR08B20 | 0  | 0 | 0  | 0 | *  |
| 133 | SSR08B21 | 0  | 0 | 0  | 0 | ** |
| 134 | SSR08B22 | 0  | 0 | 1  | 0 |    |
| 135 | SSR08B25 | 0  | 0 | 0  | 0 | ** |
| 136 | SSR08B27 | 0  | 0 | 0  | 0 | *  |
| 137 | SSR08B28 | 0  | 0 | 0  | 0 | *  |
| 138 | SSR08B29 | 0  | 0 | 0  | 0 | *  |
| 139 | SSR08B31 | 2  | 0 | 0  | 0 |    |
| 140 | SSR08B32 | 0  | 0 | 0  | 0 | *  |
| 141 | SSR08B35 | 0  | 0 | 0  | 0 | ** |
| 142 | SSR08B38 | 1  | 0 | 1  | 0 |    |
| 143 | SSR08B40 | 0  | 0 | 0  | 0 | ** |
| 144 | SSR08B44 | 1  | 0 | 1  | 0 |    |
| 145 | SSR08B47 | 1  | 0 | 1  | 0 |    |
| 146 | SSR08B54 | 0  | 0 | 0  | 0 | ** |
| 147 | SSR08B60 | 0  | 0 | 0  | 0 | *  |
| 148 | SSR08B62 | 0  | 0 | 0  | 0 | *  |
| 149 | SSR08B64 | 1  | 0 | 0  | 0 |    |
| 150 | SSR08B66 | 0  | 0 | 0  | 0 | *  |
| 151 | SSR08B68 | 0  | 0 | 0  | 0 | *  |
| 152 | SSR08B75 | 0  | 0 | 0  | 0 | *  |
| 153 | SSR08B78 | 0  | 0 | 0  | 0 | *  |
| 154 | SSR08B82 | 1  | 0 | 0  | 0 |    |
| 155 | SSR08B84 | 0  | 0 | 0  | 0 | *  |
| 156 | SSR08B85 | 0  | 0 | 0  | 0 | *  |
| 157 | SSR08B88 | 0  | 0 | 0  | 0 | *  |
| 158 | SSR08B90 | 0  | 0 | 0  | 0 | *  |
| 159 | SSR08B92 | 0  | 0 | 0  | 0 | *  |
| 160 | SSR08B95 | 0  | 0 | 0  | 0 | *  |
| 161 | SSR11A06 | 0  | 0 | 0  | 0 | *  |
| 162 | SSR11B14 | 3  | 0 | 0  | 0 |    |
| 163 | SSR11A27 | 0  | 0 | 0  | 0 | *  |
| 164 | TSGR901  | 0  | 0 | 0  | 0 | ** |

|     |          |    |   |    |   |    |
|-----|----------|----|---|----|---|----|
| 165 | TSGR904  | 0  | 0 | 1  | 1 | *  |
| 166 | TSGR905  | 0  | 0 | 0  | 0 | *  |
| 167 | TSGR906  | 15 | 0 | 26 | 0 |    |
| 168 | TSR8EM15 | 2  | 2 | 1  | 1 | *  |
| 169 | TSR8EM24 | 0  | 0 | 0  | 0 | *  |
| 170 | TSR8EM28 | 4  | 1 | 2  | 1 |    |
| 171 | TSRB07   | 4  | 0 | 7  | 1 |    |
| 172 | TSRB09   | 0  | 0 | 0  | 0 | *  |
| 173 | TSRB11   | 0  | 0 | 0  | 0 | *  |
| 174 | TSRB29   | 0  | 0 | 0  | 0 | *  |
| 175 | TSRB38   | 2  | 2 | 0  | 0 | *  |
| 176 | TSRB39   | 0  | 0 | 0  | 0 | *  |
| 177 | TSRF101  | 0  | 0 | 0  | 0 | *  |
| 178 | TSRF105  | 0  | 0 | 0  | 0 | *  |
| 179 | TSRF116  | 0  | 0 | 0  | 0 | *  |
| 180 | TSRF120  | 5  | 0 | 5  | 1 |    |
| 181 | TSRF124  | 1  | 1 | 0  | 0 | *  |
| 182 | TSRF136  | 1  | 1 | 1  | 1 | *  |
| 183 | TSRF138  | 0  | 0 | 0  | 0 | *  |
| 184 | TSRF144  | 0  | 0 | 0  | 0 | *  |
| 185 | TSRF157  | 0  | 0 | 0  | 0 | *  |
| 186 | TSRF160  | 0  | 0 | 0  | 0 | *  |
| 187 | TSRF161  | 0  | 0 | 1  | 1 | *  |
| 188 | TSRF162  | 0  | 0 | 0  | 0 | *  |
| 189 | TSRF164  | 0  | 0 | 0  | 0 | *  |
| 190 | TSRF167  | 0  | 0 | 0  | 0 | *  |
| 191 | TSRF169  | 0  | 0 | 0  | 0 | *  |
| 192 | TSRF172  | 0  | 0 | 1  | 1 |    |
| 193 | TSRF184  | 1  | 1 | 0  | 0 | *  |
| 194 | TSRF187  | 0  | 0 | 0  | 0 | *  |
| 195 | TSRF191  | 0  | 0 | 0  | 0 | ** |
| 196 | TSRF192  | 0  | 0 | 0  | 0 | *  |
| 197 | TSRF194  | 0  | 0 | 0  | 0 | *  |
| 198 | TSRF195  | 0  | 0 | 0  | 0 | *  |
| 199 | TSRF198  | 0  | 0 | 0  | 0 | *  |
| 200 | TSRF204  | 0  | 0 | 0  | 0 | *  |
| 201 | TSRF208  | 0  | 0 | 0  | 0 | *  |
| 202 | TSRF211  | 1  | 1 | 0  | 0 | *  |
| 203 | TSRF215  | 0  | 0 | 0  | 0 | *  |
| 204 | TSRF218  | 0  | 0 | 0  | 0 | *  |
| 205 | TSRF206  | 0  | 0 | 0  | 0 | ** |
| 206 | TSRF225  | 0  | 0 | 0  | 0 | *  |
| 207 | TSRF229  | 0  | 0 | 0  | 0 | *  |
| 208 | TSRF230  | 1  | 1 | 0  | 0 | *  |
| 209 | TSRF234  | 0  | 0 | 1  | 1 | ** |
| 210 | TSRF237  | 2  | 2 | 0  | 0 | *  |
| 211 | TSRF238  | 0  | 0 | 0  | 0 |    |
| 212 | TSRN214  | 0  | 0 | 0  | 0 | *  |
| 213 | TSRP06   | 0  | 0 | 0  | 0 | *  |
| 214 | TSRP07   | 0  | 0 | 0  | 0 | *  |
| 215 | CiBE0246 | 0  | 0 | 0  | 0 | *  |
| 216 | CiBE0447 | 0  | 0 | 0  | 0 | *  |
| 217 | CiBE1644 | 0  | 0 | 1  | 1 | *  |
| 218 | CiBE2165 | 0  | 0 | 0  | 0 | *  |
| 219 | CiBE2227 | 0  | 0 | 0  | 0 | *  |
| 220 | CiBE4265 | 0  | 0 | 0  | 0 | *  |
| 221 | CX0004   | 0  | 0 | 0  | 0 | *  |

|     |        |   |   |    |   |    |
|-----|--------|---|---|----|---|----|
| 222 | CX0010 | 0 | 0 | 0  | 0 |    |
| 223 | CX0035 | 0 | 0 | 1  | 1 | *  |
| 224 | CX2004 | 0 | 0 | 0  | 0 | *  |
| 225 | CX2018 | 0 | 0 | 1  | 0 |    |
| 226 | CX2021 | 0 | 0 | 0  | 0 |    |
| 227 | CX2040 | 0 | 0 | 0  | 0 | *  |
| 228 | CX3001 | 0 | 0 | 0  | 0 | *  |
| 229 | CX3040 | 9 | 0 | 10 | 0 |    |
| 230 | CX4005 | 0 | 0 | 0  | 0 | *  |
| 231 | CX4008 | 0 | 0 | 0  | 0 |    |
| 232 | CX4040 | 6 | 0 | 1  | 0 |    |
| 233 | CX5022 | 0 | 0 | 0  | 0 | ** |
| 234 | CX5039 | 0 | 0 | 0  | 0 | *  |
| 235 | CX6024 | 0 | 0 | 0  | 0 | *  |
| 236 | CX6035 | 0 | 0 | 0  | 0 | *  |
| 237 | CX6037 | 0 | 0 | 0  | 0 | *  |
| 238 | CX6F21 | 0 | 0 | 0  | 0 | *  |
| 239 | CX6F32 | 0 | 0 | 0  | 0 |    |
| 240 | F02    | 0 | 0 | 0  | 0 | *  |
| 241 | F03    | 0 | 0 | 0  | 0 | ** |
| 242 | F16    | 0 | 0 | 0  | 0 | ** |
| 243 | F21    | 0 | 0 | 1  | 1 |    |
| 244 | F40    | 0 | 0 | 0  | 0 | *  |
| 245 | F50    | 0 | 0 | 0  | 0 | *  |
| 246 | F79    | 0 | 0 | 0  | 0 | *  |

---
