# Supplementary material for: Hybrid Origins of Citrus Varieties Inferred from DNA Marker Analysis of Nuclear and Organelle Genomes
Source: PubMed Central journal article supplement (PMC5130255; doi:10.1371/journal.pone.0166969), 2016-11-30
Supplement: pone.0166969.s008.pdf [file pone.0166969.s008.pdf]

S5 Table. Summary of matched genotypes between a pair of samples by the 169 validated markers

|      |     | Matched(<5)          |          |              |          |            |          |               |          |            |            |            |            |           |                |      |       |       |              |              |            |          |           |           |            |            |            |        |         |        |             |         |               |                      |           |         |            |            |            |      |      |      |      |     |     |
|------|-----|----------------------|----------|--------------|----------|------------|----------|---------------|----------|------------|------------|------------|------------|-----------|----------------|------|-------|-------|--------------|--------------|------------|----------|-----------|-----------|------------|------------|------------|--------|---------|--------|-------------|---------|---------------|----------------------|-----------|---------|------------|------------|------------|------|------|------|------|-----|-----|
|      |     | 2                    | 1        | 1            | 1        | 1          | 1        | 8             | 1        | 4          | 4          | 4          | 4          | 1         | 1              | 2    | 2     | 1     | 2            | 1            | 1          | 2        | 3         | 3         | 3          | 1          | 1          | 2      | 2       | 1      | 6           | 6       | 6             |                      |           |         |            |            |            |      |      |      |      |     |     |
|      |     | Variety name         |          |              |          |            |          |               |          |            |            |            |            |           |                |      |       |       |              |              |            |          |           |           |            |            |            |        |         |        |             |         |               |                      |           |         |            |            |            |      |      |      |      |     |     |
|      |     | Andoukan             | Anseikan | Asahikan     | Banpeiyu | Ben Di Zao | Bergamot | Bendi Guangju | Binkitsu | Clementine | Clementine | Clementine | Clementine | Cleopatra | Cravo mandarin | Dada | Dancy | Dancy | Egami buntan | Fukure mikan | Fukushukan | Funadoko | Genshokan | Girimikan | Grapefruit | Grapefruit | Grapefruit | Hanayu | Hassaku | Hebesu | Henka mikan | Hickson | Hirado buntan | Hiroshimanatsubuntan | Houraikan | Hyoukan | Hyuganatsu | Hyuganatsu | Hyuganatsu |      |      |      |      |     |     |
| ID   | Rep | Variety name         | H        | Matched (<5) | ND       | A001       | A002     | A003          | A004     | A005       | A006       | A007       | A008       | A009      | A010           | A011 | A012  | A013  | A014         | A015         | A016       | A017     | A018      | A019      | A020       | A021       | A022       | A023   | A024    | A025   | A026        | A027    | A028          | A029                 | A030      | A031    | A032       | A033       | A034       | A035 | A036 | A037 | A038 |     |     |
| A001 | *   | Andoukan             | 0.769    | 2            | 0        | 0          | 126      | 85            | 134      | 132        | 129        | 87         | 109        | 134       | 134            | 134  | 134   | 134   | 128          | 98           | 137        | 137      | 137       | 120       | 131        | 105        | 139        | 121    | 87      | 87     | 145         | 84      | 135           | 127                  | 132       | 129     | 105        | 85         | 96         | 105  | 105  | 105  |      |     |     |
| A002 | *   | Anseikan             | 0.462    | 1            | 0        | 126        | 0        | 107           | 91       | 145        | 126        | 137        | 136        | 142       | 142            | 142  | 142   | 145   | 148          | 126          | 142        | 142      | 97        | 145       | 132        | 115        | 141        | 142    | 112     | 112    | 112         | 145     | 114           | 135                  | 139       | 146     | 87         | 98         | 130        | 95   | 139  | 139  | 139  |     |     |
| A003 | *   | Asahikan             | 0.716    | 1            | 0        | 85         | 107      | 0             | 126      | 134        | 129        | 95         | 120        | 138       | 138            | 138  | 138   | 145   | 137          | 114          | 145        | 145      | 133       | 130       | 138        | 102        | 141        | 128    | 100     | 100    | 100         | 145     | 80            | 132                  | 132       | 140     | 129        | 94         | 87         | 91   | 118  | 118  | 118  |     |     |
| A004 | *   | Banpeiyu             | 0.272    | 1            | 0        | 134        | 91       | 126           | 0        | 143        | 128        | 139        | 142        | 140       | 140            | 140  | 140   | 140   | 145          | 135          | 140        | 140      | 77        | 148       | 140        | 126        | 134        | 142    | 112     | 112    | 149         | 120     | 144           | 146                  | 145       | 64      | 108        | 135        | 124        | 138  | 138  | 138  |      |     |     |
| A005 | *   | Ben Di Zao           | 0.467    | 1            | 0        | 132        | 145      | 134           | 143      | 0          | 143        | 110        | 114        | 99        | 99             | 99   | 99    | 91    | 100          | 136          | 81         | 81       | 148       | 100       | 119        | 105        | 91         | 111    | 131     | 131    | 131         | 126     | 136           | 124                  | 119       | 98      | 143        | 131        | 115        | 136  | 129  | 129  | 129  |     |     |
| A006 | *   | Bergamot             | 0.550    | 1            | 0        | 129        | 126      | 129           | 128      | 143        | 0          | 135        | 135        | 130       | 130            | 130  | 130   | 127   | 143          | 119          | 139        | 139      | 125       | 134       | 123        | 135        | 137        | 138    | 134     | 134    | 140         | 136     | 134           | 140                  | 136       | 134     | 133        | 128        | 130        | 111  | 130  | 134  | 132  | 132 |     |
| A007 | *   | Bendi Guangju        | 0.751    | 8            | 0        | 87         | 137      | 95            | 139      | 110        | 135        | 0          | 109        | 118       | 118            | 118  | 118   | 127   | 114          | 114          | 119        | 119      | 143       | 124       | 128        | 97         | 125        | 120    | 111     | 111    | 111         | 137     | 93            | 119                  | 118       | 116     | 138        | 122        | 60         | 100  | 94   | 94   | 94   |     |     |
| A008 | *   | Binkitsu             | 0.722    | 1            | 0        | 109        | 136      | 120           | 142      | 114        | 135        | 109        | 0          | 122       | 122            | 122  | 122   | 135   | 125          | 116          | 123        | 123      | 145       | 115       | 123        | 110        | 125        | 106    | 122     | 122    | 139         | 120     | 128           | 117                  | 124       | 144     | 126        | 114        | 124        | 113  | 113  | 113  | 113  |     |     |
| A009 | *   | Clementine           | 0.426    | 4            | 0        | 134        | 142      | 138           | 140      | 99         | 130        | 118        | 122        | 0         | 0              | 0    | 92    | 73    | 130          | 83           | 83         | 146      | 121       | 124       | 117        | 90         | 122        | 132    | 132     | 132    | 129         | 136     | 124           | 125                  | 87        | 146     | 128        | 119        | 138        | 136  | 136  | 136  |      |     |     |
| A010 | *   | Clementine           | 0.426    | 4            | 0        | 134        | 142      | 138           | 140      | 99         | 130        | 118        | 122        | 0         | 0              | 0    | 92    | 73    | 130          | 83           | 83         | 146      | 121       | 124       | 117        | 90         | 122        | 132    | 132     | 132    | 129         | 136     | 124           | 125                  | 87        | 146     | 128        | 119        | 138        | 136  | 136  | 136  |      |     |     |
| A011 | *   | Clementine           | 0.426    | 4            | 0        | 134        | 142      | 138           | 140      | 99         | 130        | 118        | 122        | 0         | 0              | 0    | 92    | 73    | 130          | 83           | 83         | 146      | 121       | 124       | 117        | 90         | 122        | 132    | 132     | 132    | 129         | 136     | 124           | 125                  | 87        | 146     | 128        | 119        | 138        | 136  | 136  | 136  |      |     |     |
| A012 | *   | Clementine           | 0.426    | 4            | 0        | 134        | 142      | 138           | 140      | 99         | 130        | 118        | 122        | 0         | 0              | 0    | 92    | 73    | 130          | 83           | 83         | 146      | 121       | 124       | 117        | 90         | 122        | 132    | 132     | 132    | 129         | 136     | 124           | 125                  | 87        | 146     | 128        | 119        | 138        | 136  | 136  | 136  |      |     |     |
| A013 | *   | Cleopatra            | 0.266    | 1            | 0        | 134        | 145      | 145           | 140      | 91         | 127        | 127        | 135        | 92        | 92             | 92   | 92    | 92    | 92           | 92           | 99         | 139      | 78        | 78        | 143        | 100        | 118        | 121    | 73      | 112    | 136         | 136     | 136           | 120                  | 141       | 125     | 118        | 86         | 136        | 135  | 128  | 136  | 131  | 131 | 131 |
| A014 | *   | Cravo mandarin       | 0.479    | 1            | 0        | 128        | 148      | 137           | 145      | 100        | 143        | 114        | 125        | 73        | 73             | 73   | 73    | 99    | 0            | 132          | 81         | 81       | 150       | 111       | 121        | 113        | 93         | 123    | 121     | 121    | 130         | 132     | 119           | 125                  | 89        | 143     | 134        | 112        | 139        | 126  | 126  | 126  | 126  |     |     |
| A015 | *   | Dada                 | 0.734    | 1            | 0        | 98         | 126      | 114           | 135      | 136        | 119        | 114        | 116        | 130       | 130            | 130  | 130   | 139   | 132          | 0            | 140        | 140      | 135       | 130       | 133        | 117        | 141        | 128    | 111     | 111    | 111         | 133     | 115           | 128                  | 127       | 137     | 133        | 115        | 128        | 112  | 105  | 116  | 98   | 98  | 98  |
| A016 | *   | Dancy                | 0.367    | 2            | 0        | 137        | 142      | 145           | 140      | 81         | 139        | 119        | 123        | 83        | 83             | 83   | 83    | 78    | 81           | 140          | 0          | 0        | 154       | 105       | 117        | 122        | 66         | 117    | 141     | 141    | 141         | 128     | 143           | 128                  | 128       | 71      | 142        | 130        | 128        | 141  | 133  | 133  | 133  | 133 |     |
| A017 | *   | Dancy                | 0.367    | 2            | 0        | 137        | 142      | 145           | 140      | 81         | 139        | 119        | 123        | 83        | 83             | 83   | 83    | 78    | 81           | 140          | 0          | 0        | 154       | 105       | 117        | 122        | 66         | 117    | 141     | 141    | 141         | 128     | 143           | 128                  | 128       | 71      | 142        | 130        | 128        | 141  | 133  | 133  | 133  | 133 |     |
| A018 | *   | Egami buntan         | 0.231    | 1            | 1        | 137        | 97       | 133           | 77       | 148        | 125        | 143        | 145        | 146       | 146            | 146  | 146   | 143   | 150          | 135          | 154        | 154      | 0         | 151       | 144        | 138        | 145        | 152    | 117     | 117    | 117         | 151     | 130           | 145                  | 146       | 147     | 69         | 118        | 133        | 128  | 141  | 141  | 141  | 141 |     |
| A019 | *   | Fukure mikan         | 0.550    | 1            | 0        | 120        | 145      | 130           | 148      | 100        | 134        | 124        | 115        | 121       | 121            | 121  | 121   | 100   | 111          | 130          | 105        | 105      | 151       | 0         | 115        | 130        | 105        | 102    | 136     | 136    | 126         | 141     | 124           | 117                  | 112       | 145     | 137        | 116        | 138        | 131  | 131  | 131  | 131  |     |     |
| A020 | *   | Fukushukan           | 0.627    | 2            | 0        | 131        | 132      | 138           | 140      | 119        | 123        | 128        | 123        | 124       | 124            | 124  | 124   | 118   | 121          | 113          | 117        | 122      | 117       | 144       | 115        | 0          | 133        | 116    | 96      | 139    | 139         | 109     | 136           | 132                  | 117       | 118     | 141        | 130        | 123        | 128  | 115  | 115  | 115  |     |     |
| A021 | *   | Funadoko             | 0.633    | 1            | 0        | 105        | 115      | 102           | 126      | 105        | 135        | 97         | 110        | 117       | 117            | 117  | 117   | 121   | 113          | 107          | 122        | 138      | 130       | 133       | 0          | 123        | 132        | 134    | 104     | 104    | 100         | 120     | 126           | 123                  | 129       | 111     | 100        | 103        | 111        | 111  | 111  | 111  | 111  | 111 |     |
| A022 | *   | Genshokan            | 0.385    | 1            | 0        | 139        | 141      | 141           | 134      | 91         | 137        | 125        | 125        | 90        | 90             | 90   | 90    | 90    | 73           | 93           | 141        | 66       | 66        | 145       | 105        | 116        | 123        | 0      | 111     | 132    | 132         | 127     | 138           | 129                  | 122       | 87      | 137        | 135        | 128        | 138  | 134  | 134  | 134  |     |     |
| A023 | *   | Girimikan            | 0.627    | 2            | 0        | 121        | 142      | 128           | 142      | 111        | 138        | 120        | 106        | 122       | 122            | 122  | 122   | 113   | 123          | 128          | 117        | 117      | 152       | 102       | 96         | 132        | 111        | 0      | 128     | 128    | 114         | 130     | 126           | 120                  | 122       | 147     | 133        | 128        | 134        | 121  | 121  | 121  | 121  |     |     |
| A024 | *   | Grapefruit           | 0.669    | 3            | 0        | 87         | 112      | 100           | 112      | 131        | 134        | 111        | 122        | 132       | 132            | 132  | 132   | 136   | 121          | 111          | 141        | 141      | 117       | 136       | 139        | 104        | 132        | 128    | 0       | 0      | 0           | 151     | 85            | 132                  | 132       | 141     | 119        | 111        | 107        | 83   | 122  | 122  | 122  |     |     |
| A025 | *   | Grapefruit           | 0.669    | 3            | 0        | 87         | 112      | 100           | 112      | 131        | 134        | 111        | 122        | 132       | 132            | 132  | 132   | 136   | 121          | 111          | 141        | 141      | 117       | 136       | 139        | 104        | 132        | 128    | 0       | 0      | 0           | 151     | 85            | 132                  | 132       | 141     | 119        | 111        | 107        | 83   | 122  | 122  | 122  |     |     |
| A026 | *   | Grapefruit           | 0.669    | 3            | 0        | 87         | 112      | 100           | 112      | 131        | 134        | 111        | 122        | 132       | 132            | 132  | 132   | 136   | 121          | 111          | 141        | 141      | 117       | 136       | 139        | 104        | 132        | 128    | 0       | 0      | 0           | 151     | 85            | 132                  | 132       | 141     | 119        | 111        | 107        | 83   | 122  | 122  | 122  |     |     |
| A027 | *   | Hanayu               | 0.574    | 1            | 2        | 145        | 145      | 145           | 149      | 126        | 140        | 137        | 139        | 129       | 129            | 129  | 129   | 120   | 130          | 133          | 128        | 128      | 151       | 126       | 109        | 140        | 127        | 114    | 151     | 151    | 151         | 0       | 141           | 118                  | 113       | 127     | 152        | 142        | 132        | 146  | 138  | 138  | 138  |     |     |
| A028 | *   | Hassaku              | 0.704    | 1            | 0        | 84         | 114      | 80            | 120      | 136        | 136        | 93         | 120        | 136       | 136            | 136  | 136   | 141   | 132          | 115          | 143        | 143      | 130       | 141       | 136        | 100        | 138        | 130    | 85      | 85     | 85          | 141     | 0             | 133                  | 128       | 143     | 126        | 104        | 90         | 82   | 110  | 110  | 110  |     |     |
| A029 | *   | Hebesu               | 0.698    | 2            | 0        | 135        | 135      | 132           | 144      | 124        | 134        | 119        | 128        | 124       | 124            | 124  | 124   | 125   | 119          | 128          | 128        | 145      | 124       | 132       | 120        | 129        | 126        | 132    | 132     | 132    | 118         | 133     | 0             | 93                   | 125       | 141     | 128        | 118        | 126        | 127  | 127  | 127  |      |     |     |
| A030 | *   | Henka mikan          | 0.621    | 2            | 0        | 127        | 139      | 132           | 146      | 119        | 133        | 118        | 117        | 125       | 125            | 125  | 125   | 118   | 125          | 127          | 128        | 146      | 117       | 117       | 126        | 122        | 120        | 132    | 132     | 132    | 113         | 128     | 93            | 0                    | 120       | 143     | 136        | 117        | 118        | 122  | 122  | 122  |      |     |     |
| A031 | *   | Hickson              | 0.385    | 1            | 0        | 132        | 146      | 140           | 145      | 98         | 128        | 116        | 124        | 87        | 87             | 87   | 86    | 89    | 137          | 71           | 71         | 147      | 112       | 118       | 123        | 87         | 122        | 141    | 141     | 141    | 127         | 143     | 125           | 120                  | 0         | 146     | 134        | 118        | 140        | 131  | 131  | 131  |      |     |     |
| A032 | *   | Hirado buntan        | 0.314    | 1            | 0        | 129        | 87       | 129           | 64       | 143        | 130        | 138        | 144        | 146       | 146            | 146  | 146   | 136   | 143          | 135          | 142        | 142      | 69        | 145       | 141        | 129        | 137        | 147    | 119     | 119    | 119         | 152     | 126           | 141                  | 143       | 146     | 0          | 103        | 134        | 121  | 140  | 140  | 140  |     |     |
| A033 | *   | Hiroshimanatsubuntan | 0.615    | 2            | 0        | 105        | 98       | 94            | 108      | 131        | 111        | 122        | 126        | 128       | 128            | 128  | 128   | 135   | 134          | 112          | 130        | 130      | 118       | 137       | 130        | 111        | 135        | 133    | 111     | 111    | 111         | 142</   |               |                      |           |         |            |            |            |      |      |      |      |     |     |

|      |                    |         |    |   |     |     |     |     |     |     |     |     |     |     |     |     |     |     |     |     |     |     |     |     |     |     |     |     |     |     |     |     |     |     |     |     |     |     |     |     |     |     |     |
|------|--------------------|---------|----|---|-----|-----|-----|-----|-----|-----|-----|-----|-----|-----|-----|-----|-----|-----|-----|-----|-----|-----|-----|-----|-----|-----|-----|-----|-----|-----|-----|-----|-----|-----|-----|-----|-----|-----|-----|-----|-----|-----|-----|
| A057 | Kishu mandarin     | 0.462   | 16 | 0 | 129 | 146 | 135 | 148 | 77  | 134 | 110 | 114 | 109 | 109 | 109 | 109 | 78  | 104 | 135 | 90  | 90  | 152 | 79  | 125 | 116 | 90  | 111 | 136 | 136 | 136 | 129 | 135 | 114 | 117 | 89  | 148 | 136 | 117 | 134 | 128 | 128 | 128 |     |
| A058 | Kishu mandarin     | 0.462   | 16 | 1 | 129 | 146 | 135 | 148 | 77  | 134 | 110 | 114 | 109 | 109 | 109 | 109 | 78  | 104 | 135 | 90  | 90  | 152 | 80  | 125 | 116 | 90  | 112 | 136 | 136 | 136 | 129 | 135 | 114 | 117 | 89  | 148 | 136 | 117 | 134 | 128 | 128 | 128 |     |
| A059 | * Kishu mandarin   | 0.462   | 16 | 0 | 129 | 146 | 135 | 148 | 77  | 134 | 110 | 114 | 109 | 109 | 109 | 109 | 78  | 104 | 135 | 90  | 90  | 152 | 79  | 125 | 116 | 90  | 111 | 136 | 136 | 136 | 129 | 135 | 114 | 117 | 89  | 148 | 136 | 117 | 134 | 128 | 128 | 128 |     |
| A060 | Kishu mandarin     | 0.462   | 16 | 0 | 129 | 146 | 135 | 148 | 77  | 134 | 110 | 114 | 109 | 109 | 109 | 109 | 78  | 104 | 135 | 90  | 90  | 152 | 79  | 125 | 116 | 90  | 111 | 136 | 136 | 136 | 129 | 135 | 114 | 117 | 89  | 148 | 136 | 117 | 134 | 128 | 128 | 128 |     |
| A061 | Kishu mandarin     | 0.462   | 16 | 0 | 129 | 146 | 135 | 148 | 77  | 134 | 110 | 114 | 109 | 109 | 109 | 109 | 78  | 104 | 135 | 90  | 90  | 152 | 79  | 125 | 116 | 90  | 111 | 136 | 136 | 136 | 129 | 135 | 114 | 117 | 89  | 148 | 136 | 117 | 134 | 128 | 128 | 128 |     |
| A062 | Kishu mandarin     | 0.462   | 16 | 0 | 129 | 146 | 135 | 148 | 77  | 134 | 110 | 114 | 109 | 109 | 109 | 109 | 78  | 104 | 135 | 90  | 90  | 152 | 79  | 125 | 116 | 90  | 111 | 136 | 136 | 136 | 129 | 135 | 114 | 117 | 89  | 148 | 136 | 117 | 134 | 128 | 128 | 128 |     |
| A063 | Kishu mandarin     | 0.462   | 16 | 0 | 129 | 146 | 135 | 148 | 77  | 134 | 110 | 114 | 109 | 109 | 109 | 109 | 78  | 104 | 135 | 90  | 90  | 152 | 79  | 125 | 116 | 90  | 111 | 136 | 136 | 136 | 129 | 135 | 114 | 117 | 89  | 148 | 136 | 117 | 134 | 128 | 128 | 128 |     |
| A064 | Kishu mandarin     | 0.462   | 16 | 0 | 129 | 146 | 135 | 148 | 77  | 134 | 110 | 114 | 109 | 109 | 109 | 109 | 78  | 104 | 135 | 90  | 90  | 152 | 79  | 125 | 116 | 90  | 111 | 136 | 136 | 136 | 129 | 135 | 114 | 117 | 89  | 148 | 136 | 117 | 134 | 128 | 128 | 128 |     |
| A065 | Kishu mandarin     | 0.462   | 16 | 0 | 129 | 146 | 135 | 148 | 77  | 134 | 110 | 114 | 109 | 109 | 109 | 109 | 78  | 104 | 135 | 90  | 90  | 152 | 79  | 125 | 116 | 90  | 111 | 136 | 136 | 136 | 129 | 135 | 114 | 117 | 89  | 148 | 136 | 117 | 134 | 128 | 128 | 128 |     |
| A066 | Kishu mandarin     | 0.462   | 16 | 0 | 129 | 146 | 135 | 148 | 77  | 134 | 110 | 114 | 109 | 109 | 109 | 109 | 78  | 104 | 135 | 90  | 90  | 152 | 79  | 125 | 116 | 90  | 111 | 136 | 136 | 136 | 129 | 135 | 114 | 117 | 89  | 148 | 136 | 117 | 134 | 128 | 128 | 128 |     |
| A067 | Kishu mandarin     | 0.462   | 16 | 0 | 129 | 146 | 135 | 148 | 77  | 134 | 110 | 114 | 109 | 109 | 109 | 109 | 78  | 104 | 135 | 90  | 90  | 152 | 79  | 125 | 116 | 90  | 111 | 136 | 136 | 136 | 129 | 135 | 114 | 117 | 89  | 148 | 136 | 117 | 134 | 128 | 128 | 128 |     |
| A068 | Kishu mandarin     | 0.462   | 16 | 0 | 129 | 146 | 135 | 148 | 77  | 134 | 110 | 114 | 109 | 109 | 109 | 109 | 78  | 104 | 135 | 90  | 90  | 152 | 79  | 125 | 116 | 90  | 111 | 136 | 136 | 136 | 129 | 135 | 114 | 117 | 89  | 148 | 136 | 117 | 134 | 128 | 128 | 128 |     |
| A069 | Kishu mandarin     | 0.462   | 16 | 0 | 129 | 146 | 135 | 148 | 77  | 134 | 110 | 114 | 109 | 109 | 109 | 109 | 78  | 104 | 135 | 90  | 90  | 152 | 79  | 125 | 116 | 90  | 111 | 136 | 136 | 136 | 129 | 135 | 114 | 117 | 89  | 148 | 136 | 117 | 134 | 128 | 128 | 128 |     |
| A070 | Kishu mandarin     | 0.462   | 16 | 0 | 129 | 146 | 135 | 148 | 77  | 134 | 110 | 114 | 109 | 109 | 109 | 109 | 78  | 104 | 135 | 90  | 90  | 152 | 79  | 125 | 116 | 90  | 111 | 136 | 136 | 136 | 129 | 135 | 114 | 117 | 89  | 148 | 136 | 117 | 134 | 128 | 128 | 128 |     |
| A071 | Kishu mandarin     | 0.462   | 16 | 0 | 129 | 146 | 135 | 148 | 77  | 134 | 110 | 114 | 109 | 109 | 109 | 109 | 78  | 104 | 135 | 90  | 90  | 152 | 79  | 125 | 116 | 90  | 111 | 136 | 136 | 136 | 129 | 135 | 114 | 117 | 89  | 148 | 136 | 117 | 134 | 128 | 128 | 128 |     |
| A072 | Kishu mandarin     | 0.462   | 16 | 0 | 129 | 146 | 135 | 148 | 77  | 134 | 110 | 114 | 109 | 109 | 109 | 109 | 78  | 104 | 135 | 90  | 90  | 152 | 79  | 125 | 116 | 90  | 111 | 136 | 136 | 136 | 129 | 135 | 114 | 117 | 89  | 148 | 136 | 117 | 134 | 128 | 128 | 128 |     |
| A073 | * Kizu             | 0.698   | 2  | 0 | 135 | 135 | 132 | 144 | 124 | 134 | 119 | 128 | 124 | 124 | 124 | 124 | 125 | 119 | 128 | 128 | 128 | 145 | 142 | 132 | 120 | 129 | 126 | 132 | 132 | 132 | 118 | 133 | 0   | 93  | 125 | 141 | 128 | 118 | 126 | 127 | 127 | 127 |     |
| A075 | * Kobeni mikan     | 0.396   | 1  | 0 | 131 | 148 | 138 | 150 | 81  | 137 | 113 | 124 | 94  | 94  | 94  | 94  | 77  | 96  | 135 | 89  | 89  | 151 | 102 | 123 | 125 | 87  | 111 | 137 | 137 | 137 | 127 | 148 | 128 | 122 | 97  | 146 | 138 | 120 | 144 | 131 | 131 | 131 |     |
| A076 | * Koji             | 0.609   | 3  | 0 | 130 | 141 | 130 | 143 | 112 | 131 | 123 | 112 | 119 | 119 | 119 | 119 | 105 | 124 | 129 | 112 | 112 | 150 | 79  | 112 | 127 | 112 | 75  | 130 | 130 | 130 | 121 | 133 | 128 | 131 | 111 | 147 | 128 | 129 | 132 | 122 | 122 | 122 |     |
| A077 | Komikan 2009-130   | 0.598   | 3  | 0 | 131 | 140 | 130 | 143 | 113 | 130 | 123 | 110 | 118 | 118 | 118 | 118 | 106 | 125 | 128 | 111 | 111 | 150 | 81  | 112 | 128 | 111 | 76  | 131 | 131 | 131 | 121 | 134 | 128 | 132 | 110 | 147 | 128 | 128 | 132 | 122 | 122 | 122 |     |
| A078 | Konejime           | 0.680   | 2  | 0 | 98  | 130 | 106 | 134 | 129 | 117 | 107 | 118 | 123 | 123 | 123 | 123 | 123 | 123 | 123 | 123 | 123 | 123 | 123 | 123 | 123 | 123 | 123 | 123 | 123 | 123 | 123 | 123 | 123 | 123 | 123 | 123 | 123 | 123 | 123 | 123 | 123 | 123 | 123 |
| A079 | * Kourai Tachibana | 0.586   | 1  | 1 | 134 | 143 | 140 | 149 | 120 | 128 | 136 | 133 | 128 | 128 | 128 | 128 | 117 | 130 | 132 | 129 | 149 | 117 | 115 | 133 | 126 | 118 | 142 | 142 | 142 | 82  | 142 | 103 | 110 | 121 | 151 | 139 | 131 | 139 | 133 | 133 | 133 |     |     |
| A080 | * Kotokan          | 0.799   | 1  | 0 | 85  | 118 | 100 | 136 | 136 | 130 | 102 | 121 | 127 | 127 | 127 | 127 | 135 | 123 | 102 | 133 | 133 | 143 | 129 | 123 | 108 | 124 | 125 | 105 | 105 | 105 | 141 | 103 | 133 | 125 | 139 | 132 | 107 | 93  | 109 | 116 | 116 | 116 |     |
| A081 | * Kunenbo-A        | 0.751   | 8  | 0 | 87  | 137 | 95  | 139 | 110 | 135 | 0   | 109 | 118 | 118 | 118 | 118 | 127 | 114 | 114 | 119 | 119 | 143 | 124 | 128 | 97  | 125 | 120 | 111 | 111 | 111 | 137 | 93  | 119 | 118 | 116 | 138 | 122 | 60  | 100 | 94  | 94  | 94  |     |
| A082 | * Kunenbo-B        | 0.568   | 1  | 0 | 126 | 138 | 134 | 138 | 109 | 124 | 133 | 120 | 117 | 117 | 117 | 117 | 111 | 113 | 117 | 119 | 119 | 141 | 105 | 76  | 126 | 119 | 88  | 138 | 138 | 138 | 112 | 134 | 136 | 121 | 115 | 138 | 125 | 125 | 133 | 121 | 121 | 121 |     |
| A083 | Kunenbo            | 0.751   | 8  | 1 | 87  | 138 | 95  | 139 | 110 | 136 | 1   | 110 | 118 | 118 | 118 | 118 | 127 | 114 | 115 | 119 | 119 | 143 | 124 | 128 | 97  | 125 | 120 | 111 | 111 | 111 | 137 | 93  | 120 | 118 | 116 | 138 | 122 | 61  | 100 | 95  | 95  | 95  |     |
| A084 | Kunenbo            | 0.746   | 8  | 1 | 87  | 137 | 96  | 139 | 110 | 135 | 1   | 109 | 118 | 118 | 118 | 118 | 127 | 114 | 114 | 119 | 119 | 143 | 124 | 128 | 97  | 125 | 120 | 111 | 111 | 111 | 137 | 93  | 120 | 118 | 116 | 138 | 122 | 60  | 100 | 95  | 95  | 95  |     |
| A085 | * Lemon            | 0.633   | 1  | 0 | 136 | 131 | 133 | 142 | 142 | 84  | 139 | 139 | 135 | 135 | 135 | 135 | 133 | 144 | 132 | 141 | 141 | 139 | 137 | 128 | 141 | 140 | 139 | 140 | 140 | 136 | 144 | 142 | 147 | 138 | 141 | 130 | 135 | 138 | 137 | 137 | 137 |     |     |
| A086 | * Lemonade         | 0.598   | 1  | 0 | 120 | 133 | 120 | 134 | 143 | 106 | 128 | 133 | 132 | 132 | 132 | 132 | 129 | 135 | 120 | 142 | 142 | 132 | 137 | 135 | 129 | 137 | 138 | 128 | 128 | 128 | 133 | 132 | 133 | 134 | 128 | 135 | 118 | 121 | 130 | 132 | 132 |     |     |
| A087 | * Limonia          | 0.621   | 1  | 0 | 135 | 146 | 135 | 150 | 138 | 119 | 136 | 143 | 134 | 134 | 134 | 134 | 123 | 133 | 141 | 137 | 137 | 148 | 132 | 135 | 132 | 134 | 136 | 142 | 142 | 142 | 135 | 138 | 129 | 133 | 127 | 152 | 136 | 127 | 142 | 143 | 143 | 143 |     |
| A088 | * Mato buntan      | 0.308   | 1  | 0 | 136 | 85  | 129 | 68  | 144 | 123 | 145 | 145 | 142 | 142 | 142 | 142 | 140 | 148 | 136 | 145 | 145 | 70  | 144 | 137 | 129 | 145 | 144 | 114 | 114 | 146 | 129 | 145 | 146 | 144 | 79  | 110 | 135 | 120 | 142 | 142 | 142 |     |     |
| A089 | * Mexican lime     | 0.533   | 1  | 1 | 156 | 140 | 154 | 142 | 150 | 126 | 154 | 154 | 145 | 145 | 145 | 145 | 137 | 150 | 146 | 147 | 147 | 140 | 147 | 144 | 146 | 144 | 146 | 149 | 149 | 149 | 144 | 150 | 147 | 144 | 142 | 142 | 145 | 148 | 147 | 149 | 149 | 149 |     |
| A090 | * Meyer lemon      | 0.669   | 1  | 0 | 129 | 144 | 140 | 146 | 139 | 130 | 135 | 135 | 139 | 139 | 139 | 139 | 127 | 125 | 136 | 140 | 148 | 141 | 131 | 138 | 139 | 134 | 128 | 128 | 128 | 139 | 136 | 131 | 127 | 139 | 146 | 133 | 130 | 135 | 135 | 135 | 135 |     |     |
| A091 | * Mochiyu          | 0.698   | 1  | 1 | 134 | 145 | 133 | 147 | 116 | 137 | 106 | 128 | 124 | 124 | 124 | 124 | 132 | 120 | 132 | 126 | 126 | 146 | 122 | 124 | 138 | 129 | 119 | 137 | 137 | 137 | 108 | 128 | 87  | 83  | 121 | 150 | 136 | 117 | 131 | 119 | 119 | 119 |     |
| A092 | * Murcott          | 0.432   | 1  | 0 | 126 | 141 | 124 | 136 | 94  | 132 | 104 | 106 | 101 | 101 | 101 | 101 | 101 | 95  | 123 | 79  | 79  | 142 | 112 | 119 | 128 | 98  | 109 | 121 | 121 | 121 | 130 | 131 | 129 | 120 | 92  | 144 | 129 | 116 | 134 | 114 | 114 | 114 |     |
| A093 | Myrtle leaf orange | 0.722   | 6  | 0 | 100 | 124 | 101 | 128 | 133 | 89  | 114 | 122 | 122 | 122 | 122 | 122 | 134 | 125 | 98  | 139 | 139 | 128 | 132 | 112 | 105 | 138 | 132 | 110 | 110 | 110 | 137 | 104 | 129 | 125 | 136 | 135 | 80  | 103 | 111 | 116 | 116 | 116 |     |
| A094 | Nansho daidai      | 0.621</ |    |   |     |     |     |     |     |     |     |     |     |     |     |     |     |     |     |     |     |     |     |     |     |     |     |     |     |     |     |     |     |     |     |     |     |     |     |     |     |     |     |

|      |                          |       |    |   |     |     |     |     |     |     |     |     |     |     |     |     |     |     |     |     |     |     |     |     |     |     |     |     |     |     |     |     |     |     |     |     |     |     |     |     |     |     |
|------|--------------------------|-------|----|---|-----|-----|-----|-----|-----|-----|-----|-----|-----|-----|-----|-----|-----|-----|-----|-----|-----|-----|-----|-----|-----|-----|-----|-----|-----|-----|-----|-----|-----|-----|-----|-----|-----|-----|-----|-----|-----|-----|
| A133 | Satsuma mandarin         | 0.544 | 21 | 0 | 91  | 140 | 115 | 143 | 120 | 141 | 68  | 118 | 133 | 133 | 133 | 133 | 120 | 108 | 113 | 120 | 120 | 144 | 114 | 123 | 99  | 119 | 123 | 113 | 113 | 113 | 139 | 120 | 130 | 112 | 116 | 141 | 128 | 91  | 115 | 104 | 104 | 104 |
| A134 | * Satsuma Kikoku         | 0.680 | 2  | 0 | 98  | 130 | 106 | 134 | 129 | 117 | 107 | 118 | 123 | 123 | 123 | 123 | 131 | 122 | 97  | 138 | 138 | 134 | 131 | 124 | 107 | 132 | 133 | 103 | 103 | 103 | 142 | 104 | 123 | 119 | 126 | 133 | 112 | 97  | 105 | 113 | 113 | 113 |
| A135 | * Shikuwasha             | 0.509 | 1  | 0 | 138 | 146 | 142 | 147 | 106 | 127 | 129 | 126 | 112 | 112 | 112 | 91  | 111 | 133 | 104 | 104 | 145 | 87  | 92  | 133 | 98  | 98  | 143 | 143 | 143 | 105 | 143 | 130 | 119 | 103 | 147 | 140 | 128 | 139 | 126 | 126 | 126 |     |
| A136 | * Shikuwasha Ogemikugani | 0.503 | 1  | 0 | 140 | 144 | 140 | 145 | 111 | 128 | 133 | 125 | 121 | 121 | 121 | 91  | 115 | 136 | 108 | 108 | 148 | 95  | 89  | 128 | 105 | 100 | 148 | 148 | 107 | 140 | 128 | 119 | 107 | 148 | 141 | 129 | 137 | 133 | 133 | 133 |     |     |
| A137 | * Shunkokan              | 0.686 | 1  | 0 | 76  | 132 | 107 | 133 | 118 | 129 | 85  | 114 | 126 | 126 | 126 | 126 | 120 | 120 | 107 | 123 | 123 | 141 | 111 | 119 | 117 | 123 | 121 | 101 | 101 | 101 | 137 | 98  | 126 | 122 | 120 | 139 | 113 | 80  | 105 | 112 | 112 |     |
| A138 | * Sokitsu                | 0.432 | 1  | 0 | 136 | 144 | 143 | 146 | 67  | 140 | 116 | 117 | 101 | 101 | 101 | 101 | 87  | 96  | 137 | 89  | 89  | 149 | 100 | 120 | 115 | 88  | 116 | 139 | 139 | 139 | 132 | 142 | 127 | 120 | 100 | 144 | 132 | 121 | 139 | 125 | 125 | 125 |
| A139 | Sour orange              | 0.728 | 6  | 0 | 99  | 124 | 101 | 128 | 133 | 89  | 114 | 122 | 122 | 122 | 122 | 122 | 135 | 125 | 98  | 139 | 139 | 128 | 132 | 112 | 105 | 138 | 132 | 110 | 110 | 110 | 137 | 104 | 129 | 125 | 136 | 135 | 80  | 103 | 111 | 116 | 116 | 116 |
| A140 | Sour orange              | 0.728 | 6  | 0 | 99  | 124 | 101 | 128 | 133 | 89  | 114 | 122 | 122 | 122 | 122 | 122 | 135 | 125 | 98  | 139 | 139 | 128 | 132 | 112 | 105 | 138 | 132 | 110 | 110 | 110 | 137 | 104 | 129 | 125 | 136 | 135 | 80  | 103 | 111 | 116 | 116 | 116 |
| A141 | * Sour orange            | 0.728 | 6  | 0 | 99  | 124 | 101 | 128 | 133 | 89  | 114 | 122 | 122 | 122 | 122 | 122 | 135 | 125 | 98  | 139 | 139 | 128 | 132 | 112 | 105 | 138 | 132 | 110 | 110 | 110 | 137 | 104 | 129 | 125 | 136 | 135 | 80  | 103 | 111 | 116 | 116 | 116 |
| A142 | Sour orange              | 0.716 | 6  | 2 | 99  | 124 | 101 | 128 | 133 | 91  | 114 | 122 | 123 | 123 | 123 | 123 | 135 | 125 | 98  | 139 | 139 | 128 | 132 | 113 | 105 | 138 | 132 | 110 | 110 | 110 | 137 | 104 | 129 | 125 | 136 | 135 | 81  | 103 | 111 | 116 | 116 | 116 |
| A143 | Sour orange              | 0.728 | 6  | 0 | 99  | 124 | 101 | 128 | 133 | 89  | 114 | 122 | 122 | 122 | 122 | 122 | 135 | 125 | 98  | 139 | 139 | 128 | 132 | 112 | 105 | 138 | 132 | 110 | 110 | 110 | 137 | 104 | 129 | 125 | 136 | 135 | 80  | 103 | 111 | 116 | 116 | 116 |
| A144 | * Sudachi                | 0.680 | 1  | 0 | 127 | 136 | 127 | 146 | 116 | 131 | 129 | 126 | 122 | 122 | 122 | 122 | 125 | 128 | 131 | 126 | 126 | 148 | 122 | 126 | 132 | 133 | 115 | 138 | 138 | 138 | 103 | 134 | 77  | 112 | 128 | 147 | 124 | 128 | 131 | 136 | 136 | 136 |
| A145 | * Suisho buntan          | 0.391 | 1  | 0 | 123 | 90  | 115 | 74  | 142 | 134 | 134 | 135 | 142 | 142 | 142 | 142 | 141 | 148 | 125 | 147 | 147 | 76  | 147 | 137 | 118 | 141 | 140 | 111 | 111 | 148 | 122 | 143 | 143 | 147 | 66  | 110 | 125 | 111 | 136 | 136 | 136 |     |
| A146 | * Sunki                  | 0.349 | 2  | 0 | 130 | 149 | 141 | 148 | 90  | 129 | 123 | 120 | 92  | 92  | 92  | 92  | 92  | 94  | 137 | 68  | 68  | 148 | 86  | 121 | 126 | 77  | 108 | 136 | 136 | 136 | 123 | 142 | 127 | 124 | 81  | 150 | 137 | 120 | 141 | 136 | 136 | 136 |
| A147 | * Suruga Yuko            | 0.491 | 1  | 0 | 131 | 146 | 139 | 151 | 99  | 132 | 124 | 117 | 117 | 117 | 117 | 117 | 94  | 118 | 132 | 105 | 105 | 149 | 79  | 120 | 124 | 100 | 112 | 138 | 138 | 138 | 128 | 145 | 128 | 123 | 100 | 147 | 138 | 122 | 142 | 127 | 127 | 127 |
| A148 | Sweet orange             | 0.740 | 20 | 0 | 103 | 134 | 102 | 131 | 118 | 133 | 90  | 117 | 101 | 101 | 101 | 101 | 133 | 94  | 101 | 115 | 115 | 147 | 122 | 124 | 101 | 124 | 128 | 98  | 98  | 98  | 140 | 97  | 129 | 131 | 123 | 140 | 110 | 101 | 121 | 110 | 110 | 110 |
| A149 | Sweet orange             | 0.728 | 20 | 2 | 104 | 134 | 104 | 132 | 118 | 135 | 91  | 118 | 103 | 103 | 103 | 103 | 133 | 95  | 102 | 115 | 115 | 147 | 123 | 124 | 101 | 124 | 128 | 98  | 98  | 98  | 141 | 98  | 129 | 132 | 123 | 141 | 112 | 102 | 121 | 111 | 111 | 111 |
| A150 | Sweet orange             | 0.740 | 20 | 0 | 103 | 134 | 102 | 131 | 118 | 133 | 90  | 117 | 101 | 101 | 101 | 101 | 133 | 94  | 101 | 115 | 115 | 147 | 122 | 124 | 101 | 124 | 128 | 98  | 98  | 98  | 140 | 97  | 129 | 131 | 123 | 140 | 110 | 101 | 121 | 110 | 110 | 110 |
| A151 | Sweet orange             | 0.740 | 20 | 0 | 103 | 134 | 102 | 131 | 118 | 133 | 90  | 117 | 101 | 101 | 101 | 101 | 133 | 94  | 101 | 115 | 115 | 147 | 122 | 124 | 101 | 124 | 128 | 98  | 98  | 98  | 140 | 97  | 129 | 131 | 123 | 140 | 110 | 101 | 121 | 110 | 110 | 110 |
| A152 | Sweet orange             | 0.740 | 20 | 0 | 103 | 134 | 102 | 131 | 118 | 133 | 90  | 117 | 101 | 101 | 101 | 101 | 133 | 94  | 101 | 115 | 115 | 147 | 122 | 124 | 101 | 124 | 128 | 98  | 98  | 98  | 140 | 97  | 129 | 131 | 123 | 140 | 110 | 101 | 121 | 110 | 110 | 110 |
| A153 | Sweet orange             | 0.740 | 20 | 0 | 103 | 134 | 102 | 131 | 118 | 133 | 90  | 117 | 101 | 101 | 101 | 101 | 133 | 94  | 101 | 115 | 115 | 147 | 122 | 124 | 101 | 124 | 128 | 98  | 98  | 98  | 140 | 97  | 129 | 131 | 123 | 140 | 110 | 101 | 121 | 110 | 110 | 110 |
| A154 | Sweet orange             | 0.740 | 20 | 0 | 103 | 134 | 102 | 131 | 118 | 133 | 90  | 117 | 101 | 101 | 101 | 101 | 133 | 94  | 101 | 115 | 115 | 147 | 122 | 124 | 101 | 124 | 128 | 98  | 98  | 98  | 140 | 97  | 129 | 131 | 123 | 140 | 110 | 101 | 121 | 110 | 110 | 110 |
| A155 | Sweet orange             | 0.734 | 20 | 0 | 103 | 134 | 102 | 131 | 118 | 133 | 90  | 117 | 101 | 101 | 101 | 101 | 133 | 94  | 101 | 115 | 115 | 147 | 123 | 124 | 101 | 124 | 128 | 98  | 98  | 98  | 140 | 97  | 129 | 131 | 123 | 140 | 110 | 101 | 121 | 110 | 110 | 110 |
| A156 | Sweet orange             | 0.740 | 20 | 0 | 103 | 134 | 102 | 131 | 118 | 133 | 90  | 117 | 101 | 101 | 101 | 101 | 133 | 94  | 101 | 115 | 115 | 147 | 122 | 124 | 101 | 124 | 128 | 98  | 98  | 98  | 140 | 97  | 129 | 131 | 123 | 140 | 110 | 101 | 121 | 110 | 110 | 110 |
| A157 | Sweet orange             | 0.740 | 20 | 0 | 103 | 134 | 102 | 131 | 118 | 133 | 90  | 117 | 101 | 101 | 101 | 101 | 133 | 94  | 101 | 115 | 115 | 147 | 122 | 124 | 101 | 124 | 128 | 98  | 98  | 98  | 140 | 97  | 129 | 131 | 123 | 140 | 110 | 101 | 121 | 110 | 110 | 110 |
| A158 | Sweet orange             | 0.740 | 20 | 0 | 103 | 134 | 102 | 131 | 118 | 133 | 90  | 117 | 101 | 101 | 101 | 101 | 133 | 94  | 101 | 115 | 115 | 147 | 122 | 124 | 101 | 124 | 128 | 98  | 98  | 98  | 140 | 97  | 129 | 131 | 123 | 140 | 110 | 101 | 121 | 110 | 110 | 110 |
| A159 | Sweet orange             | 0.740 | 20 | 0 | 103 | 134 | 102 | 131 | 118 | 133 | 90  | 117 | 101 | 101 | 101 | 101 | 133 | 94  | 101 | 115 | 115 | 147 | 122 | 124 | 101 | 124 | 128 | 98  | 98  | 98  | 140 | 97  | 129 | 131 | 123 | 140 | 110 | 101 | 121 | 110 | 110 | 110 |
| A160 | Sweet orange             | 0.740 | 20 | 0 | 103 | 134 | 102 | 131 | 118 | 133 | 90  | 117 | 101 | 101 | 101 | 101 | 133 | 94  | 101 | 115 | 115 | 147 | 122 | 124 | 101 | 124 | 128 | 98  | 98  | 98  | 140 | 97  | 129 | 131 | 123 | 140 | 110 | 101 | 121 | 110 | 110 | 110 |
| A161 | Sweet orange             | 0.740 | 20 | 0 | 103 | 134 | 102 | 131 | 118 | 133 | 90  | 117 | 101 | 101 | 101 | 101 | 133 | 94  | 101 | 115 | 115 | 147 | 122 | 124 | 101 | 124 | 128 | 98  | 98  | 98  | 140 | 97  | 129 | 131 | 123 | 140 | 110 | 101 | 121 | 110 | 110 | 110 |
| A162 | * Sweet orange           | 0.740 | 20 | 0 | 103 | 134 | 102 | 131 | 118 | 133 | 90  | 117 | 101 | 101 | 101 | 101 | 133 | 94  | 101 | 115 | 115 | 147 | 122 | 124 | 101 | 124 | 128 | 98  | 98  | 98  | 140 | 97  | 129 | 131 | 123 | 140 | 110 | 101 | 121 | 110 | 110 | 110 |
| A163 | Sweet orange             | 0.740 | 20 | 0 | 103 | 134 | 102 | 131 | 118 | 133 | 90  | 117 | 101 | 101 | 101 | 101 | 133 | 94  | 101 | 115 | 115 | 147 | 122 | 124 | 101 | 124 | 128 | 98  | 98  | 98  | 140 | 97  | 129 | 131 | 123 | 140 | 110 | 101 | 121 | 110 | 110 | 110 |
| A164 | Sweet orange             | 0.740 | 20 | 0 | 103 | 134 | 102 | 131 | 118 | 133 | 90  | 117 | 101 | 101 | 101 | 101 | 133 | 94  | 101 | 115 | 115 | 147 | 122 | 124 | 101 | 124 | 128 | 98  | 98  | 98  | 140 | 97  | 129 | 131 | 123 | 140 | 110 | 101 | 121 | 110 | 110 | 110 |
| A165 | Sweet orange             | 0.740 | 20 | 0 | 103 | 134 | 102 | 131 | 118 | 133 | 90  | 117 | 101 | 101 | 101 | 101 | 133 | 94  | 101 | 115 | 115 | 147 | 122 | 124 | 101 | 124 | 128 | 98  | 98  | 98  | 140 | 97  | 129 | 131 | 123 | 140 | 110 | 101 | 121 | 110 | 110 | 110 |
| A166 | Sweet orange             | 0.740 | 20 | 0 | 103 | 134 | 102 | 131 | 118 | 133 | 90  | 117 | 101 | 101 | 101 | 101 | 133 | 94  | 101 | 115 | 115 | 147 | 122 | 124 | 101 | 124 | 128 | 98  | 98  | 98  | 140 | 97  | 129 | 131 | 123 | 140 | 110 | 101 | 121 | 110 | 110 | 110 |
| A167 | Sweet orange             | 0.746 | 20 | 0 | 103 | 134 | 102 | 130 | 117 | 133 | 89  | 116 | 100 | 100 | 100 | 100 | 133 | 93  | 101 | 114 | 114 | 148 | 122 | 124 | 102 | 124 | 128 | 97  | 97  | 97  | 140 | 98  | 128 | 131 | 122 | 139 | 109 | 101 | 121 | 109 | 109 | 109 |
| A168 | Tachibana                | 0.408 | 4  | 1 | 141 | 145 | 149 | 149 | 114 | 127 | 141 | 129 | 124 | 124 | 124 | 100 | 121 | 135 | 116 | 116 | 146 | 100 | 103 | 138 | 104 | 101 | 146 | 146 | 112 | 143 | 134 | 120 | 111 | 148 | 142 | 139 | 140 | 128 | 128 | 128 | 128 |     |
| A169 | Tachibana                | 0.426 | 7  | 0 | 141 | 148 | 146 | 145 | 112 |     |     |     |     |     |     |     |     |     |     |     |     |     |     |     |     |     |     |     |     |     |     |     |     |     |     |     |     |     |     |     |     |     |

|      |   |                     |       |   |   |     |     |     |     |     |     |     |     |     |     |     |     |     |     |     |     |     |     |     |     |     |     |     |     |     |     |     |     |     |     |     |     |     |     |     |     |     |     |
|------|---|---------------------|-------|---|---|-----|-----|-----|-----|-----|-----|-----|-----|-----|-----|-----|-----|-----|-----|-----|-----|-----|-----|-----|-----|-----|-----|-----|-----|-----|-----|-----|-----|-----|-----|-----|-----|-----|-----|-----|-----|-----|-----|
| A208 | * | Yuzu                | 0.645 | 1 | 0 | 141 | 143 | 137 | 144 | 135 | 131 | 136 | 140 | 132 | 132 | 132 | 132 | 130 | 135 | 130 | 140 | 140 | 144 | 130 | 120 | 136 | 137 | 128 | 142 | 142 | 142 | 92  | 139 | 93  | 107 | 134 | 145 | 136 | 127 | 138 | 139 | 139 | 139 |
| B001 | * | Akemi'              | 0.467 | 1 | 1 | 112 | 132 | 119 | 130 | 115 | 128 | 93  | 116 | 114 | 114 | 114 | 114 | 109 | 100 | 118 | 103 | 103 | 137 | 127 | 128 | 106 | 116 | 130 | 126 | 126 | 141 | 113 | 111 | 124 | 108 | 131 | 108 | 105 | 124 | 107 | 107 | 119 |     |
| B002 | * | 'Aki Marine'        | 0.515 | 1 | 0 | 116 | 130 | 115 | 132 | 101 | 132 | 102 | 117 | 95  | 95  | 95  | 115 | 99  | 120 | 99  | 99  | 141 | 123 | 125 | 113 | 112 | 117 | 110 | 110 | 110 | 135 | 118 | 117 | 124 | 114 | 136 | 118 | 106 | 113 | 119 | 119 | 119 |     |
| B003 | * | 'Aki Tangor'        | 0.562 | 1 | 0 | 97  | 132 | 121 | 131 | 115 | 134 | 84  | 120 | 107 | 107 | 107 | 119 | 103 | 112 | 123 | 141 | 123 | 122 | 92  | 121 | 131 | 106 | 106 | 106 | 138 | 117 | 124 | 121 | 113 | 135 | 117 | 98  | 108 | 109 | 109 | 109 |     |     |
| B004 | * | 'Allspice'          | 0.669 | 1 | 0 | 97  | 135 | 118 | 142 | 122 | 130 | 101 | 120 | 112 | 112 | 112 | 120 | 117 | 108 | 120 | 142 | 125 | 135 | 103 | 120 | 125 | 99  | 99  | 138 | 110 | 121 | 121 | 116 | 133 | 121 | 102 | 118 | 106 | 106 | 106 |     |     |     |
| B005 | * | 'Amaka'             | 0.456 | 1 | 0 | 131 | 134 | 133 | 133 | 112 | 138 | 109 | 115 | 100 | 100 | 100 | 100 | 102 | 84  | 130 | 98  | 98  | 139 | 118 | 123 | 110 | 87  | 113 | 117 | 117 | 117 | 132 | 134 | 126 | 122 | 107 | 139 | 134 | 118 | 123 | 123 | 123 |     |
| B006 | * | 'Ariake'            | 0.485 | 1 | 0 | 110 | 141 | 111 | 134 | 114 | 136 | 106 | 117 | 74  | 74  | 74  | 114 | 92  | 113 | 109 | 109 | 143 | 131 | 138 | 103 | 119 | 124 | 112 | 112 | 112 | 143 | 112 | 132 | 131 | 110 | 142 | 110 | 112 | 132 | 121 | 121 |     |     |
| B007 | * | 'Asumi'             | 0.456 | 1 | 0 | 123 | 142 | 126 | 137 | 109 | 120 | 115 | 120 | 97  | 97  | 97  | 97  | 97  | 98  | 119 | 81  | 87  | 147 | 123 | 124 | 110 | 96  | 127 | 128 | 128 | 137 | 126 | 120 | 127 | 90  | 143 | 120 | 124 | 136 | 122 | 122 |     |     |
| B008 | * | 'Aurastar'          | 0.663 | 1 | 0 | 131 | 114 | 132 | 121 | 150 | 136 | 145 | 139 | 149 | 149 | 149 | 149 | 149 | 152 | 135 | 151 | 151 | 121 | 149 | 142 | 129 | 148 | 148 | 126 | 126 | 148 | 122 | 142 | 141 | 153 | 118 | 126 | 136 | 124 | 140 | 140 |     |     |
| B009 | * | 'Awa Orange'        | 0.639 | 1 | 0 | 109 | 136 | 119 | 140 | 118 | 130 | 105 | 113 | 131 | 131 | 131 | 119 | 112 | 111 | 114 | 114 | 144 | 107 | 114 | 116 | 117 | 109 | 118 | 118 | 134 | 111 | 119 | 124 | 111 | 140 | 125 | 118 | 120 | 91  | 91  | 91  |     |     |
| B010 | * | 'Benibae'           | 0.479 | 1 | 0 | 120 | 140 | 118 | 146 | 96  | 127 | 111 | 110 | 83  | 83  | 83  | 83  | 99  | 92  | 121 | 92  | 92  | 150 | 105 | 120 | 114 | 96  | 115 | 122 | 122 | 122 | 130 | 125 | 116 | 113 | 89  | 149 | 131 | 114 | 129 | 120 | 120 |     |
| B011 | * | 'Benimadoka'        | 0.314 | 1 | 0 | 133 | 86  | 130 | 58  | 148 | 129 | 139 | 140 | 146 | 146 | 146 | 146 | 143 | 150 | 136 | 147 | 147 | 72  | 146 | 142 | 135 | 141 | 148 | 118 | 118 | 118 | 151 | 129 | 150 | 146 | 147 | 55  | 114 | 135 | 122 | 141 | 141 |     |
| B012 | * | 'Chandler pummelo'  | 0.284 | 1 | 0 | 135 | 87  | 127 | 59  | 143 | 130 | 137 | 142 | 145 | 145 | 145 | 145 | 140 | 146 | 135 | 141 | 141 | 77  | 146 | 138 | 129 | 137 | 142 | 121 | 121 | 149 | 124 | 146 | 142 | 147 | 52  | 109 | 138 | 121 | 139 | 139 |     |     |
| B013 | * | 'Ehimekashi 28'     | 0.515 | 1 | 0 | 122 | 135 | 120 | 138 | 109 | 133 | 97  | 120 | 91  | 91  | 91  | 91  | 91  | 109 | 101 | 122 | 101 | 101 | 146 | 118 | 128 | 107 | 109 | 122 | 125 | 125 | 125 | 133 | 126 | 133 | 120 | 107 | 144 | 131 | 111 | 128 | 119 | 119 |
| B014 | * | 'Encore'            | 0.432 | 1 | 0 | 131 | 140 | 130 | 137 | 97  | 131 | 115 | 109 | 91  | 91  | 91  | 89  | 78  | 127 | 87  | 87  | 142 | 107 | 113 | 115 | 78  | 108 | 126 | 126 | 126 | 126 | 122 | 135 | 120 | 113 | 91  | 137 | 133 | 123 | 138 | 130 | 130 |     |
| B015 | * | 'Fairchild'         | 0.509 | 1 | 0 | 111 | 139 | 122 | 133 | 105 | 129 | 95  | 128 | 69  | 69  | 69  | 69  | 99  | 81  | 114 | 90  | 90  | 144 | 112 | 115 | 104 | 101 | 122 | 114 | 114 | 114 | 136 | 116 | 126 | 123 | 99  | 138 | 114 | 96  | 116 | 111 | 111 |     |
| B016 | * | 'Fortune'           | 0.544 | 1 | 0 | 118 | 137 | 127 | 130 | 113 | 128 | 101 | 120 | 79  | 79  | 79  | 104 | 98  | 120 | 85  | 85  | 143 | 122 | 119 | 107 | 90  | 122 | 120 | 120 | 133 | 120 | 126 | 128 | 98  | 137 | 114 | 99  | 123 | 120 | 120 | 120 |     |     |
| B017 | * | 'Harehime'          | 0.615 | 1 | 0 | 106 | 132 | 119 | 140 | 111 | 136 | 79  | 124 | 102 | 102 | 102 | 117 | 105 | 119 | 98  | 98  | 151 | 115 | 127 | 109 | 120 | 115 | 134 | 134 | 134 | 137 | 115 | 132 | 124 | 114 | 142 | 126 | 103 | 122 | 108 | 108 |     |     |
| B018 | * | 'Hareyaka'          | 0.438 | 1 | 0 | 133 | 140 | 138 | 143 | 97  | 130 | 112 | 112 | 90  | 90  | 90  | 84  | 71  | 137 | 70  | 70  | 151 | 111 | 117 | 120 | 87  | 114 | 135 | 135 | 135 | 126 | 132 | 119 | 121 | 69  | 142 | 130 | 119 | 135 | 128 | 128 |     |     |
| B019 | * | 'Haruhi'            | 0.485 | 1 | 0 | 121 | 133 | 130 | 136 | 113 | 126 | 110 | 125 | 125 | 125 | 125 | 113 | 111 | 115 | 115 | 136 | 105 | 113 | 113 | 112 | 111 | 134 | 134 | 134 | 129 | 121 | 123 | 123 | 111 | 137 | 130 | 117 | 130 | 100 | 100 |     |     |     |
| B020 | * | 'Haruka'            | 0.586 | 1 | 0 | 113 | 135 | 127 | 138 | 111 | 140 | 115 | 116 | 115 | 115 | 115 | 107 | 103 | 115 | 115 | 115 | 141 | 106 | 104 | 111 | 113 | 88  | 119 | 119 | 119 | 124 | 120 | 124 | 118 | 118 | 138 | 125 | 113 | 127 | 93  | 93  |     |     |
| B021 | * | 'Harumi'            | 0.521 | 1 | 0 | 124 | 140 | 131 | 141 | 103 | 130 | 99  | 112 | 86  | 86  | 86  | 86  | 101 | 92  | 130 | 72  | 72  | 152 | 119 | 128 | 109 | 95  | 121 | 133 | 133 | 133 | 134 | 128 | 117 | 124 | 83  | 143 | 122 | 106 | 134 | 124 | 124 |     |
| B022 | * | 'Hayaka'            | 0.485 | 1 | 0 | 127 | 139 | 136 | 141 | 91  | 137 | 105 | 108 | 106 | 106 | 106 | 96  | 96  | 125 | 85  | 85  | 147 | 102 | 124 | 110 | 97  | 119 | 130 | 130 | 130 | 130 | 135 | 130 | 115 | 125 | 92  | 143 | 133 | 118 | 128 | 119 | 119 |     |
| B023 | * | 'Hayasaki'          | 0.290 | 1 | 0 | 136 | 88  | 130 | 69  | 143 | 125 | 146 | 141 | 145 | 145 | 145 | 145 | 146 | 147 | 131 | 144 | 144 | 68  | 147 | 138 | 133 | 145 | 148 | 123 | 123 | 123 | 149 | 135 | 146 | 144 | 144 | 53  | 118 | 139 | 125 | 139 | 139 |     |
| B024 | * | 'Himekoharu'        | 0.627 | 1 | 0 | 106 | 144 | 123 | 143 | 111 | 134 | 83  | 114 | 116 | 116 | 116 | 116 | 116 | 116 | 116 | 116 | 116 | 116 | 116 | 116 | 116 | 116 | 116 | 116 | 116 | 116 | 116 | 116 | 116 | 116 | 116 | 116 | 116 | 116 | 116 | 116 | 116 | 116 |
| B025 | * | 'Hiroshimakaken 11' | 0.444 | 1 | 0 | 119 | 130 | 119 | 131 | 104 | 125 | 113 | 118 | 91  | 91  | 91  | 91  | 106 | 100 | 123 | 94  | 139 | 113 | 125 | 114 | 104 | 118 | 114 | 114 | 136 | 123 | 125 | 125 | 105 | 136 | 118 | 115 | 115 | 124 | 124 | 124 |     |     |
| B026 | * | 'Honey'             | 0.391 | 1 | 0 | 130 | 143 | 135 | 141 | 109 | 131 | 121 | 115 | 100 | 100 | 100 | 87  | 88  | 131 | 101 | 101 | 104 | 104 | 112 | 122 | 90  | 108 | 130 | 130 | 130 | 130 | 118 | 132 | 125 | 106 | 86  | 142 | 136 | 116 | 136 | 127 | 127 |     |
| B027 | * | 'Kanpei'            | 0.562 | 1 | 1 | 117 | 138 | 130 | 136 | 110 | 131 | 99  | 107 | 90  | 90  | 90  | 90  | 90  | 106 | 126 | 88  | 145 | 111 | 128 | 108 | 100 | 119 | 123 | 123 | 123 | 138 | 124 | 123 | 129 | 92  | 137 | 118 | 111 | 132 | 120 | 120 |     |     |
| B028 | * | 'Kara'              | 0.562 | 1 | 0 | 109 | 133 | 118 | 131 | 98  | 137 | 87  | 118 | 116 | 116 | 116 | 116 | 116 | 116 | 116 | 116 | 116 | 116 | 116 | 116 | 116 | 116 | 116 | 116 | 116 | 116 | 116 | 116 | 116 | 116 | 116 | 116 | 116 | 116 | 116 | 116 | 116 | 116 |
| B029 | * | 'Kincy mandarin'    | 0.438 | 1 | 0 | 131 | 137 | 134 | 131 | 98  | 140 | 116 | 114 | 84  | 84  | 84  | 84  | 91  | 88  | 133 | 88  | 88  | 141 | 109 | 124 | 113 | 82  | 111 | 128 | 128 | 128 | 129 | 135 | 127 | 118 | 113 | 136 | 133 | 125 | 136 | 126 | 126 |     |
| B030 | * | 'Kinnow mandarin'   | 0.391 | 1 | 0 | 126 | 142 | 135 | 134 | 104 | 131 | 113 | 112 | 94  | 94  | 94  | 94  | 92  | 82  | 127 | 92  | 92  | 143 | 112 | 121 | 120 | 85  | 111 | 123 | 123 | 123 | 127 | 134 | 121 | 119 | 83  | 132 | 133 | 120 | 139 | 121 | 121 |     |
| B031 | * | 'Kiyomi'            | 0.586 | 1 | 0 | 107 | 129 | 115 | 131 | 118 | 133 | 71  | 109 | 99  | 99  | 99  | 99  | 126 | 109 | 118 | 113 | 113 | 140 | 124 | 126 | 106 | 122 | 127 | 123 | 123 | 123 | 138 | 108 | 119 | 127 | 116 | 137 | 117 | 90  | 118 | 113 | 113 |     |
| B032 | * | 'Kuchinotsu-41'     | 0.728 | 6 | 0 | 105 | 139 | 118 | 138 | 129 | 132 | 94  | 113 | 136 | 136 | 136 | 136 | 131 | 126 | 98  | 133 | 133 | 141 | 131 | 115 | 111 | 134 | 121 | 122 | 122 | 138 | 110 | 127 | 122 | 131 | 140 | 129 | 105 | 118 | 0   | 0   | 0   |     |
| B033 | * | 'Lee'               | 0.420 | 1 | 0 | 140 | 141 | 127 | 137 | 98  | 132 | 120 | 120 | 68  | 68  | 68  | 68  | 98  | 78  | 134 | 62  | 62  | 145 | 118 | 130 | 120 | 84  | 122 | 133 | 133 | 133 | 134 | 122 | 125 | 132 | 86  | 143 | 123 | 125 | 139 | 134 | 134 |     |
| B034 | * | 'May Pummelo'       | 0.538 | 1 | 0 | 105 | 106 | 98  | 89  | 143 | 130 | 108 | 132 | 143 | 143 | 143 | 143 | 146 | 136 | 123 | 146 | 146 | 105 | 142 | 138 | 111 | 138 | 141 | 102 | 102 | 102 | 148 | 84  | 137 | 133 | 135 | 83  | 108 | 99  | 108 | 126 | 126 |     |
| B035 | * | 'Mihaya'            | 0.456 | 1 | 0 | 109 | 138 | 131 | 136 | 108 | 136 | 93  | 131 | 103 | 103 | 103 | 103 | 104 | 93  | 121 | 95  | 95  | 138 | 117 | 121 | 105 | 95  | 126 | 122 | 122 | 136 | 123 | 134 | 124 | 109 | 137 | 128 | 108 | 109 | 119 | 119 |     |     |
| B036 | * | 'Mihocore'          | 0.467 | 1 | 0 | 112 | 134 | 127 | 138 | 117 | 133 | 90  | 119 | 116 | 116 | 116 | 116 | 106 | 124 | 106 | 124 | 103 | 103 | 140 | 112 | 116 | 107 | 122 | 131 | 131 | 131 | 129 | 124 | 125 | 121 | 104 | 13  |     |     |     |     |     |     |

|      |   |           |       |   |   |     |     |     |     |     |     |     |     |     |     |     |     |     |     |     |     |     |     |     |     |     |     |     |     |     |     |     |     |     |     |     |     |     |     |     |     |     |     |     |     |     |
|------|---|-----------|-------|---|---|-----|-----|-----|-----|-----|-----|-----|-----|-----|-----|-----|-----|-----|-----|-----|-----|-----|-----|-----|-----|-----|-----|-----|-----|-----|-----|-----|-----|-----|-----|-----|-----|-----|-----|-----|-----|-----|-----|-----|-----|-----|
| B076 | * | No.1408   | 0.497 | 1 | 0 | 104 | 134 | 125 | 134 | 112 | 127 | 96  | 137 | 98  | 98  | 98  | 98  | 110 | 99  | 124 | 100 | 100 | 138 | 114 | 129 | 106 | 100 | 134 | 121 | 121 | 121 | 138 | 114 | 129 | 130 | 108 | 138 | 129 | 104 | 131 | 125 | 125 | 125 |     |     |     |
| B077 | * | Okitsu-46 | 0.533 | 1 | 0 | 109 | 136 | 116 | 134 | 121 | 136 | 85  | 113 | 117 | 117 | 117 | 117 | 123 | 96  | 113 | 120 | 120 | 145 | 123 | 130 | 99  | 125 | 125 | 113 | 113 | 113 | 137 | 111 | 127 | 124 | 108 | 142 | 124 | 102 | 123 | 107 | 107 | 107 |     |     |     |
| B078 | * | Okitsu-56 | 0.373 | 1 | 0 | 135 | 147 | 134 | 147 | 87  | 135 | 121 | 123 | 89  | 89  | 89  | 89  | 86  | 85  | 141 | 80  | 80  | 144 | 99  | 110 | 117 | 126 | 126 | 134 | 135 | 126 | 120 | 90  | 145 | 134 | 114 | 138 | 133 | 133 | 133 | 133 | 133 |     |     |     |     |
| C001 | * | Strain 01 | 0.325 | 1 | 0 | 132 | 135 | 126 | 131 | 101 | 131 | 108 | 115 | 100 | 100 | 100 | 100 | 98  | 98  | 131 | 85  | 85  | 138 | 114 | 120 | 115 | 103 | 116 | 133 | 133 | 127 | 129 | 121 | 123 | 93  | 137 | 123 | 117 | 131 | 127 | 127 | 127 |     |     |     |     |
| C002 | * | Strain 02 | 0.509 | 1 | 0 | 127 | 144 | 126 | 138 | 103 | 138 | 99  | 130 | 70  | 70  | 70  | 70  | 112 | 87  | 122 | 103 | 103 | 144 | 120 | 135 | 111 | 121 | 129 | 120 | 120 | 120 | 140 | 130 | 126 | 128 | 118 | 146 | 136 | 111 | 133 | 118 | 118 |     |     |     |     |
| C003 | * | Strain 03 | 0.556 | 1 | 0 | 120 | 139 | 113 | 139 | 106 | 131 | 88  | 117 | 99  | 99  | 99  | 99  | 112 | 109 | 127 | 91  | 91  | 153 | 119 | 125 | 119 | 106 | 112 | 139 | 139 | 139 | 134 | 130 | 126 | 125 | 100 | 147 | 134 | 118 | 132 | 117 | 117 |     |     |     |     |
| C004 | * | Strain 04 | 0.592 | 1 | 0 | 109 | 123 | 115 | 123 | 131 | 118 | 103 | 127 | 127 | 127 | 127 | 127 | 132 | 134 | 114 | 139 | 139 | 129 | 135 | 124 | 112 | 139 | 131 | 112 | 112 | 112 | 132 | 111 | 129 | 128 | 135 | 132 | 117 | 104 | 111 | 102 | 102 | 102 |     |     |     |
| C005 | * | Strain 05 | 0.580 | 1 | 0 | 108 | 134 | 121 | 141 | 118 | 140 | 78  | 125 | 107 | 107 | 107 | 107 | 117 | 101 | 119 | 113 | 113 | 147 | 127 | 125 | 93  | 110 | 128 | 120 | 120 | 138 | 111 | 122 | 131 | 113 | 144 | 127 | 98  | 121 | 109 | 109 | 109 |     |     |     |     |
| C006 | * | Strain 06 | 0.426 | 1 | 0 | 124 | 138 | 119 | 142 | 104 | 140 | 105 | 121 | 102 | 102 | 102 | 102 | 111 | 82  | 124 | 104 | 104 | 147 | 111 | 124 | 92  | 112 | 117 | 120 | 120 | 129 | 113 | 118 | 115 | 108 | 147 | 130 | 103 | 129 | 124 | 124 | 124 |     |     |     |     |
| C007 | * | Strain 07 | 0.533 | 1 | 2 | 78  | 114 | 108 | 124 | 119 | 133 | 97  | 112 | 122 | 122 | 122 | 122 | 121 | 132 | 121 | 121 | 121 | 129 | 125 | 126 | 123 | 122 | 101 | 101 | 101 | 136 | 102 | 133 | 130 | 125 | 123 | 144 | 108 | 105 | 127 | 127 |     |     |     |     |     |
| C008 | * | Strain 08 | 0.462 | 1 | 0 | 97  | 138 | 118 | 136 | 113 | 125 | 98  | 114 | 108 | 108 | 108 | 108 | 114 | 105 | 117 | 102 | 102 | 141 | 114 | 125 | 115 | 115 | 115 | 115 | 115 | 115 | 138 | 110 | 124 | 123 | 102 | 140 | 120 | 103 | 109 | 113 | 113 | 113 |     |     |     |
| C009 | * | Strain 09 | 0.420 | 1 | 0 | 123 | 137 | 124 | 134 | 107 | 135 | 102 | 121 | 99  | 99  | 99  | 99  | 116 | 101 | 124 | 114 | 114 | 138 | 119 | 125 | 104 | 120 | 121 | 121 | 121 | 121 | 135 | 124 | 126 | 129 | 106 | 138 | 127 | 117 | 130 | 120 | 120 | 120 |     |     |     |
| C010 | * | Strain 10 | 0.438 | 1 | 0 | 127 | 144 | 128 | 139 | 91  | 136 | 104 | 119 | 86  | 86  | 86  | 86  | 88  | 81  | 131 | 85  | 85  | 146 | 109 | 130 | 113 | 89  | 115 | 129 | 129 | 129 | 133 | 128 | 117 | 131 | 90  | 139 | 127 | 118 | 134 | 122 | 122 | 122 |     |     |     |
| C011 | * | Strain 11 | 0.521 | 1 | 0 | 119 | 135 | 129 | 133 | 111 | 136 | 86  | 111 | 99  | 99  | 99  | 99  | 99  | 99  | 102 | 92  | 126 | 98  | 98  | 141 | 122 | 127 | 95  | 103 | 120 | 124 | 124 | 133 | 124 | 125 | 128 | 104 | 135 | 119 | 110 | 127 | 115 | 115 | 115 |     |     |
| C012 | * | Strain 12 | 0.391 | 1 | 0 | 130 | 131 | 138 | 130 | 112 | 137 | 99  | 112 | 100 | 100 | 100 | 100 | 100 | 92  | 130 | 95  | 95  | 137 | 122 | 122 | 108 | 94  | 114 | 122 | 122 | 122 | 132 | 132 | 117 | 122 | 87  | 130 | 128 | 118 | 124 | 124 | 124 | 124 |     |     |     |
| C013 | * | Strain 13 | 0.598 | 1 | 0 | 101 | 133 | 109 | 137 | 118 | 118 | 87  | 112 | 121 | 121 | 121 | 121 | 112 | 122 | 112 | 116 | 116 | 148 | 111 | 120 | 99  | 120 | 120 | 120 | 120 | 132 | 119 | 112 | 112 | 111 | 139 | 117 | 97  | 104 | 90  | 90  | 90  | 90  |     |     |     |
| C014 | * | Strain 14 | 0.402 | 1 | 0 | 126 | 143 | 123 | 132 | 98  | 132 | 102 | 127 | 93  | 93  | 93  | 108 | 90  | 125 | 86  | 86  | 149 | 116 | 134 | 109 | 109 | 127 | 133 | 133 | 133 | 139 | 130 | 121 | 141 | 105 | 140 | 129 | 116 | 138 | 120 | 120 | 120 | 120 |     |     |     |
| C015 | * | Strain 15 | 0.426 | 1 | 0 | 126 | 139 | 128 | 141 | 98  | 130 | 102 | 122 | 107 | 107 | 107 | 107 | 107 | 107 | 107 | 107 | 107 | 107 | 107 | 107 | 107 | 107 | 107 | 107 | 107 | 107 | 107 | 107 | 107 | 107 | 107 | 107 | 107 | 107 | 107 | 107 | 107 | 107 | 107 | 107 |     |
| C016 | * | Strain 16 | 0.284 | 1 | 0 | 135 | 83  | 132 | 72  | 147 | 127 | 145 | 145 | 139 | 139 | 139 | 139 | 144 | 141 | 134 | 149 | 149 | 62  | 146 | 139 | 131 | 142 | 148 | 121 | 121 | 121 | 148 | 133 | 144 | 142 | 145 | 54  | 116 | 136 | 129 | 140 | 140 | 140 |     |     |     |
| C017 | * | Strain 17 | 0.527 | 1 | 0 | 119 | 131 | 123 | 137 | 112 | 134 | 89  | 116 | 125 | 125 | 125 | 125 | 107 | 126 | 131 | 100 | 100 | 144 | 112 | 133 | 116 | 104 | 121 | 126 | 126 | 138 | 122 | 126 | 127 | 110 | 136 | 122 | 99  | 117 | 113 | 113 | 113 | 113 |     |     |     |
| C018 | * | Strain 18 | 0.521 | 1 | 0 | 123 | 139 | 133 | 143 | 107 | 143 | 82  | 122 | 98  | 98  | 98  | 98  | 99  | 81  | 127 | 85  | 85  | 149 | 114 | 122 | 109 | 100 | 112 | 129 | 129 | 129 | 134 | 132 | 124 | 118 | 96  | 144 | 131 | 111 | 127 | 121 | 121 | 121 |     |     |     |
| C019 | * | Strain 19 | 0.497 | 1 | 0 | 124 | 139 | 132 | 144 | 112 | 134 | 93  | 112 | 103 | 103 | 103 | 103 | 109 | 96  | 129 | 105 | 105 | 146 | 114 | 113 | 114 | 102 | 118 | 130 | 130 | 130 | 128 | 132 | 126 | 108 | 108 | 139 | 129 | 109 | 123 | 117 | 117 | 117 |     |     |     |
| C020 | * | Strain 20 | 0.467 | 1 | 0 | 131 | 144 | 134 | 140 | 118 | 139 | 116 | 110 | 91  | 91  | 91  | 91  | 91  | 91  | 91  | 91  | 91  | 91  | 91  | 91  | 91  | 91  | 91  | 91  | 91  | 91  | 91  | 91  | 91  | 91  | 91  | 91  | 91  | 91  | 91  | 91  | 91  | 91  | 91  |     |     |
| C021 | * | Strain 21 | 0.402 | 1 | 0 | 121 | 137 | 116 | 132 | 105 | 131 | 105 | 115 | 98  | 98  | 98  | 98  | 98  | 98  | 98  | 98  | 98  | 98  | 98  | 98  | 98  | 98  | 98  | 98  | 98  | 98  | 98  | 98  | 98  | 98  | 98  | 98  | 98  | 98  | 98  | 98  | 98  | 98  | 98  | 98  |     |
| C022 | * | Strain 22 | 0.473 | 1 | 0 | 112 | 145 | 123 | 144 | 106 | 135 | 96  | 124 | 88  | 88  | 88  | 88  | 88  | 88  | 88  | 88  | 88  | 88  | 88  | 88  | 88  | 88  | 88  | 88  | 88  | 88  | 88  | 88  | 88  | 88  | 88  | 88  | 88  | 88  | 88  | 88  | 88  | 88  | 88  | 88  |     |
| C023 | * | Strain 23 | 0.527 | 1 | 0 | 118 | 138 | 128 | 145 | 98  | 138 | 99  | 121 | 109 | 109 | 109 | 109 | 109 | 109 | 109 | 109 | 109 | 109 | 109 | 109 | 109 | 109 | 109 | 109 | 109 | 109 | 109 | 109 | 109 | 109 | 109 | 109 | 109 | 109 | 109 | 109 | 109 | 109 | 109 | 109 | 109 |
| C024 | * | Strain 24 | 0.527 | 1 | 0 | 112 | 137 | 115 | 136 | 105 | 140 | 83  | 127 | 115 | 115 | 115 | 115 | 108 | 102 | 132 | 114 | 114 | 143 | 119 | 120 | 102 | 105 | 124 | 120 | 120 | 123 | 113 | 125 | 118 | 139 | 125 | 94  | 114 | 110 | 124 | 124 | 124 | 124 |     |     |     |
| C025 | * | Strain 25 | 0.379 | 1 | 0 | 124 | 139 | 134 | 139 | 99  | 140 | 114 | 110 | 92  | 92  | 92  | 92  | 92  | 92  | 92  | 92  | 92  | 92  | 92  | 92  | 92  | 92  | 92  | 92  | 92  | 92  | 92  | 92  | 92  | 92  | 92  | 92  | 92  | 92  | 92  | 92  | 92  | 92  | 92  | 92  |     |
| C026 | * | Strain 26 | 0.556 | 1 | 0 | 98  | 133 | 114 | 131 | 109 | 133 | 70  | 114 | 104 | 104 | 104 | 104 | 122 | 106 | 117 | 108 | 108 | 143 | 123 | 135 | 97  | 124 | 127 | 119 | 119 | 119 | 142 | 107 | 128 | 125 | 111 | 135 | 115 | 95  | 113 | 117 | 117 | 117 |     |     |     |
| C027 | * | Strain 27 | 0.450 | 1 | 0 | 125 | 136 | 122 | 134 | 102 | 133 | 101 | 106 | 92  | 92  | 92  | 92  | 108 | 92  | 125 | 101 | 101 | 141 | 110 | 121 | 104 | 98  | 110 | 125 | 125 | 125 | 127 | 126 | 129 | 120 | 105 | 144 | 128 | 114 | 131 | 129 | 129 | 129 |     |     |     |
| C028 | * | Strain 28 | 0.473 | 1 | 0 | 128 | 133 | 124 | 138 | 98  | 137 | 103 | 123 | 98  | 98  | 98  | 98  | 94  | 97  | 127 | 101 | 101 | 145 | 105 | 123 | 109 | 92  | 126 | 129 | 129 | 133 | 130 | 121 | 122 | 109 | 145 | 124 | 112 | 119 | 128 | 128 | 128 |     |     |     |     |
| C029 | * | Strain 29 | 0.379 | 1 | 0 | 129 | 135 | 128 | 137 | 104 | 133 | 118 | 119 | 93  | 93  | 93  | 93  | 95  | 94  | 128 | 90  | 90  | 141 | 109 | 120 | 114 | 101 | 116 | 116 | 116 | 132 | 128 | 123 | 122 | 93  | 140 | 130 | 119 | 124 | 122 | 122 | 122 |     |     |     |     |
| C030 | * | Strain 30 | 0.568 | 1 | 0 | 119 | 135 | 126 | 139 | 104 | 139 | 82  | 120 | 96  | 96  | 96  | 96  | 114 | 101 | 125 | 96  | 96  | 149 | 123 | 128 | 108 | 107 | 121 | 132 | 132 | 133 | 121 | 126 | 127 | 107 | 140 | 126 | 100 | 127 | 119 | 119 | 119 |     |     |     |     |
| C031 | * | Strain 31 | 0.450 | 1 | 0 | 129 | 134 | 134 | 137 | 103 | 138 | 104 | 128 | 96  | 96  | 96  | 96  | 94  | 86  | 132 | 100 | 100 | 137 | 112 | 110 | 116 | 95  | 120 | 129 | 129 | 129 | 121 | 127 | 117 | 105 | 138 | 134 | 115 | 118 | 123 | 123 | 123 |     |     |     |     |
| C032 | * | Strain 32 | 0.544 | 1 | 0 | 97  | 131 | 127 | 132 | 114 | 138 | 80  | 119 | 106 | 106 | 106 | 106 | 118 | 108 | 119 | 115 | 115 | 138 | 124 | 134 | 94  | 122 | 128 | 116 | 116 | 140 | 111 | 129 | 124 | 122 | 134 | 129 | 103 | 128 | 120 | 120 | 120 |     |     |     |     |
| C033 | * | Strain 33 | 0.533 | 1 | 0 | 110 | 138 | 123 | 130 | 111 | 137 | 91  | 122 | 112 | 112 | 112 | 112 | 107 | 98  | 112 | 110 | 110 | 141 | 125 | 129 | 101 | 113 | 123 | 108 | 108 | 108 | 141 | 114 | 119 | 13  |     |     |     |     |     |     |     |     |     |     |     |

|      |   |           |       |   |   |     |     |     |     |     |     |     |     |     |     |     |     |     |     |     |     |     |     |     |     |     |     |     |     |     |     |     |     |     |     |     |     |     |     |     |     |     |     |
|------|---|-----------|-------|---|---|-----|-----|-----|-----|-----|-----|-----|-----|-----|-----|-----|-----|-----|-----|-----|-----|-----|-----|-----|-----|-----|-----|-----|-----|-----|-----|-----|-----|-----|-----|-----|-----|-----|-----|-----|-----|-----|-----|
| C073 | * | Strain 73 | 0.521 | 1 | 0 | 129 | 139 | 126 | 144 | 93  | 130 | 113 | 115 | 83  | 83  | 83  | 83  | 100 | 89  | 129 | 85  | 85  | 145 | 107 | 127 | 116 | 99  | 121 | 133 | 133 | 133 | 132 | 126 | 125 | 128 | 97  | 139 | 119 | 109 | 131 | 127 | 127 | 127 |
| C074 | * | Strain 74 | 0.450 | 1 | 0 | 121 | 145 | 123 | 137 | 103 | 128 | 116 | 126 | 83  | 83  | 83  | 83  | 97  | 84  | 126 | 76  | 76  | 142 | 112 | 119 | 114 | 105 | 116 | 124 | 124 | 124 | 131 | 122 | 125 | 129 | 77  | 145 | 124 | 113 | 141 | 123 | 123 | 123 |
| C075 | * | Strain 75 | 0.580 | 1 | 1 | 105 | 115 | 118 | 112 | 138 | 139 | 130 | 126 | 140 | 140 | 140 | 140 | 143 | 134 | 122 | 139 | 139 | 120 | 139 | 133 | 119 | 144 | 141 | 108 | 108 | 108 | 150 | 103 | 139 | 130 | 144 | 115 | 111 | 119 | 105 | 127 | 127 | 127 |
| C076 | * | Strain 76 | 0.645 | 1 | 0 | 98  | 115 | 113 | 111 | 140 | 133 | 117 | 133 | 142 | 142 | 142 | 142 | 140 | 136 | 117 | 143 | 143 | 119 | 140 | 134 | 117 | 140 | 139 | 94  | 94  | 94  | 150 | 93  | 146 | 139 | 148 | 111 | 109 | 119 | 97  | 124 | 124 | 124 |
| C077 | * | Strain 77 | 0.574 | 1 | 0 | 115 | 135 | 119 | 139 | 101 | 138 | 81  | 101 | 90  | 90  | 90  | 90  | 115 | 90  | 127 | 96  | 96  | 143 | 113 | 130 | 113 | 104 | 113 | 127 | 127 | 127 | 133 | 118 | 120 | 113 | 103 | 140 | 125 | 100 | 126 | 111 | 111 | 111 |
| C078 | * | Strain 78 | 0.497 | 1 | 2 | 112 | 143 | 122 | 143 | 124 | 131 | 94  | 106 | 115 | 115 | 115 | 115 | 120 | 106 | 122 | 107 | 107 | 144 | 123 | 128 | 120 | 116 | 122 | 122 | 122 | 122 | 139 | 125 | 126 | 123 | 104 | 144 | 126 | 107 | 125 | 115 | 115 | 115 |
| C079 | * | Strain 79 | 0.533 | 1 | 0 | 120 | 138 | 129 | 135 | 121 | 127 | 114 | 118 | 110 | 110 | 110 | 110 | 121 | 111 | 133 | 113 | 113 | 141 | 125 | 132 | 118 | 124 | 131 | 126 | 126 | 126 | 135 | 126 | 119 | 130 | 102 | 140 | 124 | 109 | 125 | 121 | 121 | 121 |
| C080 | * | Strain 80 | 0.669 | 1 | 0 | 117 | 137 | 112 | 141 | 115 | 137 | 91  | 104 | 115 | 115 | 115 | 115 | 127 | 101 | 111 | 116 | 116 | 146 | 124 | 124 | 101 | 122 | 108 | 117 | 117 | 117 | 139 | 113 | 122 | 128 | 120 | 140 | 123 | 105 | 124 | 94  | 94  | 94  |
| C081 | * | Strain 81 | 0.479 | 1 | 0 | 109 | 136 | 116 | 135 | 110 | 131 | 95  | 118 | 96  | 96  | 96  | 96  | 114 | 107 | 125 | 84  | 84  | 149 | 115 | 134 | 106 | 111 | 123 | 128 | 128 | 128 | 139 | 125 | 122 | 134 | 103 | 148 | 125 | 116 | 130 | 124 | 124 | 124 |
| C082 | * | Strain 82 | 0.669 | 1 | 0 | 91  | 115 | 101 | 128 | 127 | 134 | 103 | 117 | 129 | 129 | 129 | 129 | 134 | 124 | 112 | 132 | 132 | 131 | 130 | 130 | 109 | 132 | 130 | 88  | 88  | 88  | 144 | 87  | 131 | 115 | 138 | 128 | 112 | 104 | 78  | 106 | 106 | 106 |
| C083 | * | Strain 83 | 0.497 | 1 | 1 | 112 | 137 | 118 | 142 | 110 | 130 | 78  | 107 | 108 | 108 | 108 | 108 | 114 | 105 | 125 | 91  | 91  | 149 | 107 | 129 | 105 | 102 | 117 | 130 | 130 | 130 | 134 | 121 | 123 | 116 | 105 | 143 | 122 | 104 | 126 | 117 | 117 | 117 |
| C084 | * | Strain 84 | 0.462 | 1 | 0 | 122 | 142 | 126 | 138 | 106 | 147 | 97  | 130 | 102 | 102 | 102 | 102 | 101 | 90  | 130 | 91  | 91  | 150 | 117 | 129 | 103 | 106 | 117 | 124 | 124 | 124 | 136 | 117 | 137 | 127 | 101 | 140 | 130 | 120 | 128 | 122 | 122 | 122 |
| C085 | * | Strain 85 | 0.349 | 1 | 0 | 136 | 139 | 142 | 138 | 94  | 133 | 109 | 123 | 85  | 85  | 85  | 85  | 86  | 92  | 140 | 71  | 71  | 145 | 117 | 121 | 117 | 89  | 128 | 138 | 138 | 138 | 130 | 140 | 123 | 129 | 86  | 142 | 129 | 118 | 132 | 139 | 139 | 139 |

H: Observed heterozygosity of individuals estimated with 169 DNA markers



















































|     |     |     |     |     |     |     |     |     |     |     |     |     |     |     |     |     |     |     |     |     |     |     |     |     |     |     |     |     |     |     |     |     |     |     |     |     |     |     |     |     |     |     |     |     |     |     |     |     |     |     |     |
|-----|-----|-----|-----|-----|-----|-----|-----|-----|-----|-----|-----|-----|-----|-----|-----|-----|-----|-----|-----|-----|-----|-----|-----|-----|-----|-----|-----|-----|-----|-----|-----|-----|-----|-----|-----|-----|-----|-----|-----|-----|-----|-----|-----|-----|-----|-----|-----|-----|-----|-----|-----|
| 149 | 91  | 100 | 113 | 119 | 112 | 106 | 120 | 75  | 111 | 122 | 101 | 137 | 88  | 95  | 67  | 108 | 89  | 112 | 112 | 142 | 110 | 107 | 142 | 140 | 103 | 104 | 103 | 110 | 80  | 120 | 102 | 107 | 113 | 97  | 145 | 86  | 96  | 105 | 106 | 72  | 110 | 110 | 87  | 104 | 126 | 117 | 79  | 73  | 91  | 84  | 102 |
| 145 | 97  | 123 | 107 | 132 | 127 | 91  | 106 | 118 | 106 | 132 | 104 | 132 | 118 | 114 | 109 | 96  | 126 | 112 | 117 | 136 | 115 | 118 | 139 | 136 | 121 | 121 | 116 | 121 | 117 | 124 | 124 | 124 | 115 | 122 | 138 | 121 | 118 | 120 | 125 | 118 | 129 | 123 | 113 | 113 | 126 | 118 | 125 | 125 | 108 | 114 | 123 |
| 151 | 128 | 112 | 143 | 102 | 96  | 140 | 143 | 122 | 140 | 97  | 137 | 128 | 128 | 128 | 131 | 126 | 114 | 131 | 121 | 145 | 112 | 111 | 147 | 145 | 124 | 104 | 118 | 119 | 128 | 106 | 109 | 116 | 122 | 106 | 113 | 133 | 126 | 114 | 149 | 122 | 118 | 129 | 132 | 129 |     |     |     |     |     |     |     |
| 149 | 129 | 108 | 142 | 113 | 103 | 143 | 119 | 139 | 97  | 138 | 131 | 130 | 132 | 133 | 129 | 112 | 140 | 127 | 147 | 119 | 113 | 147 | 144 | 125 | 107 | 122 | 126 | 130 | 113 | 118 | 114 | 126 | 115 | 147 | 115 | 123 | 101 | 121 | 122 | 107 | 117 | 134 | 133 | 119 | 144 | 121 | 119 | 130 | 130 | 133 |     |
| 140 | 80  | 120 | 108 | 122 | 117 | 90  | 107 | 92  | 98  | 118 | 89  | 129 | 104 | 119 | 100 | 107 | 128 | 119 | 114 | 148 | 110 | 119 | 135 | 137 | 126 | 117 | 109 | 104 | 109 | 115 | 111 | 110 | 116 | 100 | 135 | 100 | 118 | 120 | 108 | 106 | 130 | 122 | 105 | 112 | 127 | 120 | 109 | 104 | 106 | 107 | 123 |
| 146 | 121 | 115 | 136 | 81  | 85  | 143 | 137 | 102 | 140 | 92  | 132 | 134 | 115 | 111 | 118 | 119 | 105 | 121 | 112 | 150 | 121 | 105 | 145 | 143 | 110 | 92  | 108 | 107 | 118 | 88  | 109 | 109 | 104 | 91  | 150 | 100 | 109 | 103 | 105 | 101 | 93  | 99  | 119 | 125 | 100 | 143 | 99  | 107 | 124 | 107 | 115 |
| 137 | 103 | 131 | 102 | 133 | 127 | 96  | 106 | 132 | 105 | 137 | 99  | 127 | 117 | 115 | 108 | 106 | 127 | 106 | 117 | 130 | 118 | 122 | 138 | 134 | 128 | 127 | 110 | 116 | 121 | 130 | 117 | 116 | 125 | 132 | 136 | 120 | 121 | 128 | 119 | 114 | 131 | 133 | 112 | 116 | 123 | 121 | 118 | 120 | 111 | 116 | 121 |
| 137 | 103 | 131 | 102 | 133 | 127 | 96  | 106 | 132 | 105 | 137 | 99  | 127 | 117 | 115 | 108 | 106 | 127 | 106 | 117 | 130 | 118 | 122 | 138 | 134 | 128 | 127 | 110 | 116 | 121 | 130 | 117 | 116 | 125 | 132 | 136 | 120 | 121 | 128 | 119 | 114 | 131 | 133 | 112 | 116 | 123 | 121 | 118 | 120 | 111 | 116 | 121 |
| 137 | 103 | 131 | 102 | 133 | 127 | 96  | 106 | 132 | 105 | 137 | 99  | 127 | 117 | 115 | 108 | 106 | 127 | 106 | 117 | 130 | 118 | 122 | 138 | 134 | 128 | 127 | 110 | 116 | 121 | 130 | 117 | 116 | 125 | 132 | 136 | 120 | 121 | 128 | 119 | 114 | 131 | 133 | 112 | 116 | 123 | 121 | 118 | 120 | 111 | 116 | 121 |
| 137 | 103 | 131 | 102 | 133 | 127 | 96  | 106 | 132 | 105 | 137 | 99  | 127 | 117 | 115 | 108 | 106 | 127 | 106 | 117 | 130 | 118 | 122 | 138 | 134 | 128 | 127 | 110 | 116 | 121 | 130 | 117 | 116 | 125 | 132 | 136 | 120 | 121 | 128 | 119 | 114 | 131 | 133 | 112 | 116 | 123 | 121 | 118 | 120 | 111 | 116 | 121 |
| 137 | 103 | 131 | 102 | 133 | 127 | 96  | 106 | 132 | 105 | 137 | 99  | 127 | 117 | 115 | 108 | 106 | 127 | 106 | 117 | 130 | 118 | 122 | 138 | 134 | 128 | 127 | 110 | 116 | 121 | 130 | 117 | 116 | 125 | 132 | 136 | 120 | 121 | 128 | 119 | 114 | 131 | 133 | 112 | 116 | 123 | 121 | 118 | 120 | 111 | 116 | 121 |
| 151 | 128 | 141 | 136 | 126 | 124 | 128 | 127 | 134 | 130 | 122 | 129 | 90  | 122 | 122 | 136 | 131 | 131 | 130 | 125 | 147 | 125 | 120 | 149 | 145 | 130 | 119 | 132 | 133 | 127 | 118 | 128 | 124 | 127 | 130 | 144 | 122 | 124 | 121 | 128 | 125 | 127 | 128 | 126 | 136 | 124 | 143 | 137 | 131 | 134 | 136 | 127 |
| 78  | 125 | 140 | 106 | 145 | 144 | 122 | 119 | 137 | 116 | 150 | 126 | 142 | 132 | 126 | 132 | 139 | 131 | 137 | 145 | 118 | 140 | 145 | 80  | 65  | 137 | 137 | 142 | 138 | 142 | 143 | 132 | 130 | 144 | 143 | 75  | 146 | 128 | 143 | 138 | 135 | 139 | 137 | 136 | 144 | 90  | 138 | 143 | 137 | 135 | 135 |     |
| 147 | 120 | 124 | 140 | 80  | 76  | 143 | 143 | 100 | 137 | 70  | 127 | 134 | 115 | 110 | 118 | 124 | 97  | 119 | 104 | 149 | 120 | 95  | 148 | 151 | 113 | 84  | 98  | 99  | 113 | 89  | 106 | 110 | 97  | 88  | 147 | 105 | 104 | 80  | 100 | 105 | 87  | 97  | 117 | 136 | 81  | 140 | 97  | 98  | 103 | 113 | 120 |
| 151 | 122 | 114 | 145 | 98  | 98  | 124 | 139 | 108 | 139 | 101 | 131 | 126 | 133 | 127 | 126 | 123 | 118 | 127 | 111 | 153 | 111 | 112 | 148 | 152 | 124 | 111 | 122 | 114 | 127 | 111 | 104 | 119 | 115 | 90  | 146 | 113 | 117 | 104 | 116 | 114 | 116 | 124 | 127 | 117 | 148 | 116 | 109 | 128 | 115 | 124 |     |
| 148 | 101 | 128 | 108 | 116 | 115 | 102 | 88  | 129 | 108 | 129 | 102 | 133 | 93  | 93  | 77  | 100 | 116 | 68  | 82  | 140 | 94  | 95  | 142 | 141 | 96  | 116 | 85  | 94  | 85  | 111 | 105 | 110 | 95  | 121 | 148 | 93  | 92  | 123 | 101 | 107 | 112 | 116 | 74  | 110 | 92  | 123 | 105 | 104 | 81  | 94  | 82  |
| 148 | 101 | 128 | 108 | 116 | 115 | 102 | 88  | 129 | 108 | 129 | 102 | 133 | 93  | 93  | 77  | 101 | 116 | 68  | 82  | 140 | 94  | 96  | 143 | 142 | 97  | 116 | 87  | 95  | 87  | 111 | 105 | 110 | 96  | 121 | 149 | 93  | 92  | 123 | 102 | 107 | 114 | 117 | 75  | 111 | 94  | 124 | 105 | 104 | 82  | 95  | 84  |
| 148 | 101 | 128 | 108 | 116 | 115 | 102 | 88  | 129 | 108 | 129 | 102 | 133 | 93  | 93  | 77  | 100 | 116 | 68  | 82  | 140 | 94  | 95  | 142 | 141 | 96  | 116 | 85  | 94  | 85  | 111 | 105 | 110 | 95  | 121 | 148 | 93  | 92  | 123 | 101 | 107 | 112 | 116 | 74  | 110 | 92  | 123 | 105 | 104 | 81  | 94  | 82  |
| 148 | 101 | 128 | 108 | 116 | 115 | 102 | 88  | 129 | 108 | 129 | 102 | 133 | 93  | 93  | 77  | 100 | 116 | 68  | 82  | 140 | 94  | 95  | 142 | 141 | 96  | 116 | 85  | 94  | 85  | 111 | 105 | 110 | 95  | 121 | 148 | 93  | 92  | 123 | 101 | 107 | 112 | 116 | 74  | 110 | 92  | 123 | 105 | 104 | 81  | 94  | 82  |
| 148 | 101 | 128 | 108 | 116 | 115 | 102 | 88  | 129 | 108 | 129 | 102 | 133 | 93  | 93  | 77  | 100 | 116 | 68  | 82  | 140 | 94  | 95  | 142 | 141 | 96  | 116 | 85  | 94  | 85  | 111 | 105 | 110 | 95  | 121 | 148 | 93  | 92  | 123 | 101 | 107 | 112 | 116 | 74  | 110 | 92  | 123 | 105 | 104 | 81  | 94  | 82  |
| 148 | 101 | 128 | 108 | 116 | 115 | 102 | 88  | 129 | 108 | 129 | 102 | 133 | 93  | 93  | 77  | 100 | 116 | 68  | 82  | 140 | 94  | 95  | 142 | 141 | 96  | 116 | 85  | 94  | 85  | 111 | 105 | 110 | 95  | 121 | 148 | 93  | 92  | 123 | 101 | 107 | 112 | 116 | 74  | 110 | 92  | 123 | 105 | 104 | 81  | 94  | 82  |
| 148 | 101 | 128 | 108 | 116 | 115 | 102 | 88  | 129 | 108 | 129 | 102 | 133 | 93  | 93  | 77  | 100 | 116 | 68  | 82  | 140 | 94  | 95  | 142 | 141 | 96  | 116 | 85  | 94  | 85  | 111 | 105 | 110 | 95  | 121 | 148 | 93  | 92  | 123 | 101 | 107 | 112 | 116 | 74  | 110 | 92  | 123 | 105 | 104 | 81  | 94  | 82  |
| 148 | 101 | 128 | 108 | 116 | 115 | 102 | 88  | 129 | 108 | 129 | 102 | 133 | 93  | 93  | 77  | 100 | 116 | 68  | 82  | 140 | 94  | 95  | 142 | 141 | 96  | 116 | 85  | 94  | 85  | 111 | 105 | 110 | 95  | 121 | 148 | 93  | 92  | 123 | 101 | 107 | 112 | 116 | 74  | 110 | 92  | 123 | 105 | 104 | 81  | 94  | 82  |
| 148 | 101 | 128 | 108 | 116 | 115 | 102 | 88  | 129 | 108 | 129 | 102 | 133 | 93  | 93  | 77  | 100 | 116 | 68  | 82  | 140 | 94  | 95  | 142 | 141 | 96  | 116 | 85  | 94  | 85  | 111 | 105 | 110 | 95  | 121 | 148 | 93  | 92  | 123 | 101 | 107 | 112 | 116 | 74  | 110 | 92  | 123 | 105 | 104 | 81  | 94  | 82  |
| 148 | 101 | 128 | 108 | 116 | 115 | 102 | 88  | 129 | 108 | 129 | 102 | 133 | 93  | 93  | 77  | 100 | 116 | 68  | 82  | 140 | 94  | 95  | 142 | 141 | 96  | 116 | 85  | 94  | 85  | 111 | 105 | 110 | 95  | 121 | 148 | 93  | 92  | 123 | 101 | 107 | 112 | 116 | 74  | 110 | 92  | 123 | 105 | 104 | 81  | 94  | 82  |
| 148 | 101 | 128 | 108 | 116 | 115 | 102 | 88  | 129 | 108 | 129 | 102 | 133 | 93  | 93  | 77  | 100 | 116 | 68  | 82  | 140 | 94  | 95  | 142 | 141 | 96  | 116 | 85  | 94  | 85  | 111 | 105 | 110 | 95  | 121 | 148 | 93  | 92  | 123 | 101 | 107 | 112 | 116 | 74  | 110 | 92  | 123 | 105 | 104 | 81  | 94  | 82  |
| 148 | 101 | 128 | 108 | 116 | 115 | 102 | 88  | 129 | 108 | 129 | 102 | 133 | 93  | 93  | 77  | 100 | 116 | 68  | 82  | 140 | 94  | 95  | 142 | 141 | 96  | 116 | 85  | 94  | 85  | 111 | 105 | 110 | 95  | 121 | 148 | 93  | 92  | 123 | 101 | 107 | 112 | 116 | 74  | 110 | 92  | 123 | 105 | 104 | 81  | 94  | 82  |
| 148 | 101 | 128 | 108 | 116 | 115 | 102 | 88  | 129 | 108 | 129 | 102 | 133 | 93  | 93  | 77  | 100 | 116 | 68  | 82  | 140 | 94  | 95  | 142 | 141 | 96  | 116 | 85  | 94  | 85  | 111 | 105 | 110 | 95  | 121 | 148 | 93  | 92  | 123 | 101 | 107 | 112 | 116 | 74  | 110 | 92  | 123 | 105 | 104 | 81  | 94  | 82  |
| 148 | 101 | 128 | 108 | 116 | 115 | 102 | 88  | 129 | 108 | 129 | 102 | 133 | 93  | 93  | 77  | 100 | 116 | 68  | 82  | 140 | 94  | 95  | 142 | 141 | 96  | 116 | 85  | 94  | 85  | 111 | 105 | 110 | 95  | 121 | 148 | 93  | 92  | 123 | 101 | 107 | 112 | 116 | 74  | 110 | 92  | 123 | 105 | 104 | 81  | 94  | 82  |
| 148 | 101 | 128 | 108 | 116 | 115 | 102 | 88  | 129 | 108 | 129 | 102 | 133 | 93  | 93  | 77  | 100 | 116 | 68  | 82  | 140 | 94  | 95  | 142 | 141 | 96  | 116 | 85  | 94  | 85  | 111 | 105 | 110 | 95  | 121 | 148 | 93  | 92  | 123 | 101 | 107 | 112 | 116 | 74  | 110 | 92  | 123 | 105 | 104 | 81  | 94  | 82  |
| 148 | 101 | 128 | 108 | 116 | 115 | 102 | 88  | 129 | 108 | 129 | 102 | 133 | 93  | 93  | 77  | 100 | 116 | 68  | 82  | 140 | 94  | 95  | 142 | 141 | 96  | 116 |     |     |     |     |     |     |     |     |     |     |     |     |     |     |     |     |     |     |     |     |     |     |     |     |     |

|     |     |     |     |     |     |     |     |     |     |     |     |     |     |     |     |     |     |     |     |     |     |     |     |     |     |     |     |     |     |     |     |     |     |     |     |     |     |     |     |     |     |     |     |     |     |     |     |     |     |     |     |     |
|-----|-----|-----|-----|-----|-----|-----|-----|-----|-----|-----|-----|-----|-----|-----|-----|-----|-----|-----|-----|-----|-----|-----|-----|-----|-----|-----|-----|-----|-----|-----|-----|-----|-----|-----|-----|-----|-----|-----|-----|-----|-----|-----|-----|-----|-----|-----|-----|-----|-----|-----|-----|-----|
| 147 | 127 | 137 | 143 | 129 | 130 | 134 | 140 | 137 | 139 | 129 | 139 | 0   | 139 | 134 | 135 | 140 | 141 | 139 | 138 | 149 | 137 | 131 | 147 | 145 | 138 | 128 | 133 | 138 | 136 | 126 | 133 | 127 | 135 | 138 | 142 | 135 | 132 | 127 | 139 | 138 | 137 | 134 | 139 | 139 | 134 | 140 | 138 | 134 | 139 | 136 | 139 |     |
| 133 | 105 | 119 | 119 | 107 | 98  | 116 | 121 | 110 | 120 | 114 | 112 | 139 | 0   | 80  | 78  | 106 | 89  | 103 | 86  | 139 | 100 | 93  | 135 | 130 | 96  | 98  | 88  | 99  | 86  | 95  | 90  | 111 | 83  | 97  | 134 | 103 | 83  | 109 | 99  | 93  | 102 | 89  | 67  | 107 | 98  | 121 | 89  | 77  | 81  | 94  | 85  |     |
| 140 | 106 | 120 | 109 | 105 | 101 | 118 | 108 | 115 | 120 | 120 | 114 | 134 | 80  | 0   | 91  | 109 | 87  | 91  | 86  | 141 | 113 | 92  | 139 | 136 | 82  | 105 | 98  | 102 | 78  | 106 | 110 | 111 | 77  | 97  | 134 | 103 | 42  | 113 | 104 | 83  | 99  | 98  | 73  | 119 | 90  | 127 | 106 | 105 | 83  | 89  | 82  |     |
| 136 | 98  | 122 | 112 | 124 | 119 | 92  | 118 | 93  | 113 | 130 | 100 | 135 | 78  | 91  | 0   | 114 | 102 | 90  | 91  | 136 | 105 | 115 | 137 | 138 | 107 | 120 | 97  | 98  | 93  | 121 | 100 | 102 | 99  | 106 | 137 | 99  | 99  | 118 | 94  | 92  | 108 | 119 | 56  | 109 | 123 | 121 | 93  | 85  | 90  | 78  | 88  |     |
| 149 | 102 | 111 | 109 | 116 | 106 | 102 | 97  | 111 | 117 | 118 | 104 | 140 | 106 | 109 | 114 | 0   | 100 | 96  | 108 | 141 | 114 | 104 | 141 | 139 | 116 | 104 | 96  | 108 | 115 | 105 | 116 | 107 | 110 | 114 | 140 | 109 | 101 | 113 | 101 | 114 | 96  | 126 | 106 | 111 | 124 | 105 | 115 | 92  | 99  | 110 |     |     |
| 142 | 118 | 112 | 120 | 93  | 75  | 120 | 130 | 104 | 137 | 102 | 127 | 141 | 89  | 87  | 102 | 100 | 0   | 107 | 100 | 144 | 120 | 91  | 140 | 138 | 100 | 66  | 96  | 96  | 104 | 87  | 105 | 107 | 96  | 94  | 139 | 98  | 84  | 80  | 85  | 84  | 74  | 81  | 101 | 123 | 100 | 134 | 72  | 84  | 102 | 85  | 103 |     |
| 142 | 112 | 131 | 122 | 111 | 108 | 114 | 112 | 126 | 117 | 122 | 101 | 139 | 103 | 91  | 90  | 96  | 107 | 0   | 85  | 142 | 115 | 94  | 141 | 145 | 103 | 111 | 93  | 102 | 99  | 106 | 119 | 108 | 97  | 116 | 142 | 112 | 96  | 117 | 100 | 115 | 103 | 107 | 121 | 88  | 127 | 102 | 110 | 97  | 95  | 88  |     |     |
| 149 | 124 | 127 | 124 | 92  | 95  | 119 | 118 | 118 | 133 | 98  | 112 | 138 | 86  | 86  | 91  | 108 | 100 | 85  | 0   | 144 | 91  | 89  | 146 | 148 | 99  | 112 | 94  | 86  | 93  | 87  | 120 | 52  | 85  | 146 | 102 | 84  | 104 | 73  | 102 | 114 | 97  | 86  | 122 | 89  | 137 | 89  | 85  | 88  | 96  | 82  |     |     |
| 116 | 136 | 142 | 126 | 153 | 151 | 132 | 131 | 146 | 129 | 149 | 131 | 149 | 139 | 141 | 136 | 141 | 144 | 142 | 144 | 0   | 142 | 148 | 123 | 124 | 143 | 152 | 141 | 147 | 145 | 151 | 141 | 137 | 149 | 146 | 125 | 148 | 144 | 100 | 147 | 139 | 148 | 149 | 141 | 140 | 150 | 128 | 143 | 147 | 145 | 144 | 147 |     |
| 145 | 118 | 113 | 117 | 113 | 109 | 116 | 115 | 113 | 109 | 121 | 121 | 115 | 137 | 100 | 113 | 105 | 114 | 120 | 115 | 91  | 142 | 0   | 106 | 144 | 142 | 118 | 114 | 116 | 106 | 106 | 108 | 63  | 101 | 103 | 104 | 139 | 99  | 111 | 119 | 109 | 112 | 119 | 111 | 94  | 91  | 121 | 132 | 113 | 106 | 107 | 118 | 96  |
| 151 | 114 | 111 | 131 | 86  | 75  | 127 | 124 | 114 | 122 | 90  | 116 | 131 | 93  | 92  | 115 | 104 | 91  | 94  | 89  | 148 | 106 | 0   | 149 | 150 | 80  | 65  | 89  | 101 | 93  | 83  | 110 | 112 | 86  | 100 | 146 | 112 | 92  | 81  | 113 | 93  | 83  | 75  | 107 | 120 | 77  | 137 | 85  | 86  | 101 | 104 | 101 |     |
| 68  | 135 | 140 | 118 | 149 | 149 | 132 | 138 | 140 | 120 | 148 | 124 | 147 | 135 | 139 | 137 | 141 | 140 | 141 | 146 | 123 | 144 | 149 | 0   | 68  | 143 | 144 | 142 | 138 | 146 | 148 | 134 | 135 | 151 | 147 | 44  | 142 | 136 | 144 | 139 | 138 | 135 | 141 | 138 | 141 | 144 | 84  | 140 | 137 | 148 | 143 | 139 |     |
| 71  | 138 | 143 | 120 | 141 | 144 | 135 | 130 | 140 | 135 | 145 | 131 | 145 | 130 | 136 | 138 | 139 | 138 | 145 | 148 | 124 | 142 | 150 | 68  | 0   | 143 | 137 | 141 | 135 | 140 | 140 | 137 | 137 | 148 | 143 | 71  | 146 | 133 | 141 | 143 | 138 | 134 | 136 | 136 | 139 | 143 | 101 | 140 | 140 | 143 | 141 | 135 |     |
| 148 | 111 | 118 | 124 | 96  | 98  | 121 | 121 | 109 | 130 | 107 | 117 | 138 | 96  | 82  | 107 | 116 | 100 | 103 | 99  | 143 | 118 | 80  | 143 | 143 | 0   | 93  | 83  | 100 | 74  | 93  | 118 | 110 | 94  | 109 | 145 | 108 | 90  | 103 | 110 | 95  | 89  | 88  | 93  | 119 | 91  | 131 | 102 | 110 | 90  | 95  | 87  |     |
| 146 | 123 | 119 | 128 | 77  | 56  | 133 | 135 | 112 | 139 | 84  | 130 | 128 | 98  | 105 | 120 | 104 | 66  | 111 | 102 | 152 | 114 | 65  | 144 | 137 | 93  | 0   | 93  | 93  | 107 | 63  | 100 | 106 | 92  | 98  | 141 | 99  | 96  | 62  | 102 | 81  | 62  | 46  | 112 | 130 | 85  | 137 | 80  | 86  | 107 | 95  | 111 |     |
| 142 | 96  | 123 | 117 | 89  | 83  | 111 | 117 | 108 | 121 | 108 | 111 | 133 | 88  | 98  | 97  | 96  | 96  | 93  | 94  | 141 | 116 | 89  | 142 | 141 | 83  | 93  | 0   | 56  | 83  | 97  | 106 | 98  | 86  | 100 | 146 | 105 | 92  | 103 | 93  | 87  | 93  | 88  | 98  | 111 | 77  | 128 | 79  | 96  | 75  | 81  | 94  |     |
| 139 | 99  | 122 | 122 | 94  | 85  | 121 | 127 | 115 | 117 | 112 | 123 | 138 | 99  | 102 | 98  | 108 | 96  | 102 | 86  | 147 | 106 | 101 | 138 | 135 | 100 | 93  | 56  | 0   | 102 | 93  | 98  | 120 | 82  | 93  | 141 | 97  | 93  | 102 | 77  | 99  | 96  | 98  | 120 | 79  | 135 | 85  | 84  | 82  | 88  | 98  |     |     |
| 149 | 103 | 117 | 124 | 103 | 110 | 117 | 113 | 101 | 115 | 115 | 101 | 136 | 86  | 78  | 93  | 115 | 104 | 99  | 83  | 145 | 106 | 93  | 146 | 140 | 74  | 107 | 83  | 102 | 0   | 104 | 110 | 111 | 85  | 105 | 145 | 102 | 84  | 119 | 106 | 93  | 92  | 106 | 67  | 108 | 92  | 129 | 92  | 95  | 91  | 87  | 74  |     |
| 144 | 119 | 124 | 134 | 70  | 69  | 134 | 128 | 117 | 136 | 78  | 130 | 126 | 95  | 106 | 121 | 105 | 87  | 106 | 87  | 151 | 108 | 83  | 148 | 140 | 93  | 63  | 97  | 93  | 104 | 0   | 100 | 108 | 75  | 88  | 144 | 99  | 94  | 82  | 92  | 100 | 97  | 66  | 113 | 128 | 82  | 140 | 90  | 94  | 95  | 102 | 99  |     |
| 134 | 117 | 113 | 131 | 104 | 101 | 125 | 132 | 111 | 130 | 115 | 120 | 133 | 90  | 110 | 100 | 116 | 105 | 119 | 91  | 141 | 63  | 110 | 134 | 137 | 118 | 100 | 106 | 98  | 110 | 100 | 0   | 108 | 105 | 97  | 133 | 89  | 102 | 103 | 99  | 109 | 114 | 110 | 92  | 100 | 117 | 120 | 97  | 90  | 110 | 109 | 85  |     |
| 137 | 113 | 104 | 122 | 109 | 103 | 118 | 126 | 109 | 121 | 117 | 116 | 127 | 111 | 111 | 102 | 107 | 107 | 108 | 120 | 137 | 101 | 112 | 135 | 137 | 110 | 106 | 98  | 120 | 111 | 108 | 108 | 0   | 123 | 112 | 140 | 107 | 116 | 109 | 104 | 106 | 108 | 114 | 121 | 93  | 121 | 123 | 110 | 117 | 104 | 108 | 113 |     |
| 150 | 106 | 125 | 129 | 79  | 84  | 124 | 125 | 114 | 127 | 98  | 127 | 135 | 83  | 77  | 99  | 110 | 96  | 97  | 52  | 149 | 103 | 86  | 151 | 148 | 94  | 92  | 86  | 82  | 85  | 75  | 105 | 123 | 0   | 85  | 147 | 105 | 79  | 98  | 75  | 102 | 99  | 83  | 75  | 124 | 79  | 139 | 92  | 86  | 87  | 96  | 79  |     |
| 145 | 118 | 110 | 125 | 95  | 80  | 125 | 134 | 70  | 130 | 98  | 132 | 138 | 97  | 97  | 106 | 114 | 94  | 116 | 85  | 146 | 104 | 100 | 147 | 143 | 109 | 98  | 100 | 93  | 105 | 88  | 97  | 112 | 85  | 0   | 148 | 103 | 103 | 104 | 85  | 85  | 104 | 98  | 97  | 119 | 99  | 139 | 93  | 87  | 99  | 87  | 98  |     |
| 72  | 139 | 143 | 123 | 149 | 147 | 128 | 135 | 144 | 133 | 150 | 131 | 142 | 134 | 134 | 137 | 140 | 139 | 142 | 146 | 125 | 139 | 146 | 44  | 71  | 145 | 141 | 146 | 141 | 145 | 144 | 133 | 140 | 147 | 148 | 0   | 148 | 133 | 142 | 143 | 141 | 142 | 140 | 139 | 147 | 99  | 144 | 140 | 144 | 142 | 139 |     |     |
| 149 | 105 | 110 | 113 | 98  | 97  | 119 | 121 | 100 | 115 | 110 | 116 | 135 | 103 | 103 | 99  | 110 | 98  | 112 | 102 | 148 | 99  | 112 | 142 | 146 | 108 | 99  | 105 | 97  | 102 | 99  | 89  | 107 | 105 | 103 | 148 | 0   | 107 | 106 | 97  | 92  | 108 | 102 | 92  | 107 | 119 | 130 | 91  | 92  | 109 | 104 | 98  |     |
| 136 | 115 | 127 | 118 | 88  | 90  | 125 | 112 | 124 | 130 | 111 | 114 | 132 | 83  | 42  | 99  | 109 | 84  | 96  | 84  | 144 | 111 | 92  | 136 | 133 | 90  | 96  | 92  | 93  | 84  | 94  | 102 | 116 | 79  | 103 | 133 | 107 | 0   | 105 | 93  | 105 | 89  | 93  | 95  | 124 | 82  | 131 | 100 | 94  | 86  | 85  | 86  |     |
| 146 | 116 | 122 | 141 | 87  | 67  | 127 | 137 | 117 | 134 | 84  | 126 | 127 | 109 | 113 | 118 | 101 | 80  | 117 | 104 | 150 | 119 | 81  | 144 | 141 | 103 | 62  | 103 | 102 | 119 | 82  | 102 | 109 | 88  | 104 | 142 | 106 | 105 | 0   | 109 | 99  | 92  | 68  | 120 | 127 | 101 | 134 | 95  | 92  | 108 | 105 | 119 |     |
| 143 | 111 | 120 | 122 | 100 | 93  | 122 | 126 | 104 | 123 | 115 | 122 | 139 | 99  | 104 | 94  | 113 | 85  | 100 | 73  | 147 | 109 | 113 | 139 | 143 | 110 | 102 | 93  | 77  | 106 | 92  | 99  | 104 | 75  | 85  | 143 | 97  | 93  | 109 | 0   | 114 | 94  | 102 | 91  | 120 | 94  | 133 | 92  | 89  | 97  | 93  | 86  |     |
| 144 | 99  | 100 | 106 | 107 | 96  | 115 | 127 | 83  | 116 | 106 | 114 | 138 | 93  | 83  | 92  | 101 | 84  | 115 | 102 | 139 | 112 | 93  | 138 | 138 | 95  | 81  | 87  | 99  | 93  | 100 | 109 | 106 | 102 | 85  | 141 | 92  | 105 | 99  | 114 | 0   | 91  | 84  | 89  | 106 | 116 | 127 | 132 | 67  | 82  | 98  | 83  | 103 |
| 140 | 125 | 123 | 131 | 91  | 76  | 133 | 133 | 111 | 135 | 94  | 126 | 137 | 102 | 99  | 108 | 114 | 74  | 103 | 114 | 148 | 119 | 83  | 135 | 134 | 89  | 62  | 93  | 96  | 92  | 97  | 114 | 108 | 99  | 104 | 142 | 108 | 89  | 92  | 94  | 91  | 0   | 73  | 100 | 126 | 83  | 134 | 92  | 105 | 115 | 98  | 101 |     |
| 144 | 120 | 118 | 123 | 74  | 67  | 133 | 132 | 118 | 135 | 92  | 127 | 134 | 89  | 98  | 119 | 96  | 81  | 107 | 97  | 149 | 111 | 75  | 141 | 136 | 88  | 46  | 88  | 98  | 106 | 66  | 110 | 114 | 83  | 98  | 140 | 102 | 83  | 68  |     |     |     |     |     |     |     |     |     |     |     |     |     |     |

|     |     |     |     |     |     |     |     |     |     |     |     |     |     |     |     |     |     |     |     |     |     |     |     |     |     |     |     |     |     |     |     |     |     |     |     |     |     |     |     |     |     |     |     |     |     |     |     |     |     |     |     |     |
|-----|-----|-----|-----|-----|-----|-----|-----|-----|-----|-----|-----|-----|-----|-----|-----|-----|-----|-----|-----|-----|-----|-----|-----|-----|-----|-----|-----|-----|-----|-----|-----|-----|-----|-----|-----|-----|-----|-----|-----|-----|-----|-----|-----|-----|-----|-----|-----|-----|-----|-----|-----|-----|
| 140 | 104 | 125 | 120 | 101 | 95  | 116 | 126 | 103 | 119 | 107 | 105 | 136 | 97  | 111 | 110 | 103 | 100 | 106 | 102 | 144 | 122 | 92  | 140 | 140 | 110 | 90  | 79  | 95  | 97  | 101 | 110 | 115 | 99  | 106 | 142 | 100 | 105 | 109 | 101 | 83  | 99  | 98  | 102 | 125 | 98  | 120 | 52  | 80  | 98  | 91  | 106 |     |
| 146 | 102 | 117 | 121 | 118 | 117 | 114 | 115 | 105 | 107 | 122 | 107 | 136 | 80  | 86  | 67  | 109 | 100 | 91  | 78  | 143 | 106 | 102 | 138 | 140 | 99  | 115 | 108 | 108 | 88  | 108 | 82  | 109 | 103 | 110 | 144 | 89  | 107 | 110 | 91  | 104 | 117 | 116 | 74  | 107 | 115 | 109 | 105 | 92  | 95  | 99  | 73  |     |
| 145 | 114 | 127 | 139 | 74  | 63  | 139 | 130 | 108 | 136 | 91  | 133 | 128 | 108 | 103 | 114 | 109 | 92  | 117 | 94  | 153 | 112 | 91  | 150 | 143 | 110 | 83  | 93  | 95  | 116 | 84  | 107 | 117 | 85  | 87  | 146 | 110 | 90  | 101 | 88  | 104 | 98  | 93  | 93  | 109 | 133 | 81  | 138 | 104 | 100 | 106 | 98  | 117 |
| 134 | 117 | 109 | 136 | 84  | 87  | 139 | 136 | 119 | 136 | 96  | 121 | 130 | 82  | 89  | 99  | 108 | 74  | 101 | 80  | 141 | 109 | 84  | 136 | 135 | 101 | 80  | 102 | 90  | 99  | 75  | 91  | 115 | 78  | 96  | 135 | 96  | 83  | 99  | 90  | 99  | 98  | 82  | 88  | 127 | 96  | 126 | 83  | 67  | 107 | 92  | 95  |     |
| 148 | 111 | 132 | 133 | 100 | 102 | 118 | 118 | 108 | 128 | 109 | 119 | 134 | 103 | 94  | 99  | 109 | 109 | 77  | 96  | 145 | 119 | 91  | 144 | 148 | 76  | 111 | 85  | 116 | 76  | 106 | 126 | 112 | 95  | 108 | 141 | 111 | 99  | 115 | 116 | 106 | 101 | 109 | 97  | 118 | 93  | 136 | 107 | 125 | 101 | 84  | 87  |     |
| 147 | 118 | 119 | 130 | 99  | 103 | 128 | 126 | 110 | 128 | 109 | 114 | 139 | 98  | 78  | 99  | 116 | 97  | 100 | 92  | 152 | 108 | 82  | 145 | 143 | 79  | 97  | 103 | 99  | 59  | 95  | 108 | 118 | 83  | 103 | 140 | 102 | 80  | 107 | 102 | 92  | 90  | 94  | 85  | 117 | 85  | 132 | 100 | 99  | 104 | 100 | 90  |     |
| 125 | 104 | 119 | 102 | 133 | 133 | 109 | 121 | 120 | 119 | 138 | 116 | 132 | 118 | 117 | 108 | 126 | 116 | 113 | 129 | 137 | 114 | 132 | 130 | 129 | 125 | 135 | 116 | 124 | 130 | 130 | 115 | 114 | 131 | 131 | 134 | 119 | 113 | 135 | 127 | 116 | 126 | 132 | 118 | 102 | 131 | 121 | 119 | 116 | 113 | 121 | 121 |     |
| 147 | 98  | 118 | 117 | 101 | 106 | 111 | 114 | 98  | 110 | 114 | 113 | 135 | 70  | 87  | 81  | 101 | 91  | 96  | 92  | 143 | 111 | 86  | 145 | 143 | 95  | 98  | 90  | 93  | 76  | 99  | 103 | 112 | 92  | 111 | 101 | 84  | 99  | 100 | 75  | 109 | 103 | 120 | 68  | 72  | 81  | 84  | 74  |     |     |     |     |     |
| 148 | 103 | 118 | 128 | 98  | 99  | 125 | 111 | 104 | 122 | 102 | 117 | 125 | 89  | 70  | 93  | 103 | 95  | 89  | 90  | 140 | 119 | 88  | 146 | 147 | 82  | 99  | 119 | 82  | 88  | 102 | 97  | 87  | 99  | 144 | 103 | 87  | 101 | 112 | 91  | 107 | 101 | 90  | 124 | 93  | 120 | 95  | 106 | 94  | 88  | 82  |     |     |
| 132 | 108 | 128 | 98  | 122 | 118 | 108 | 110 | 114 | 114 | 127 | 90  | 141 | 115 | 102 | 112 | 123 | 123 | 125 | 127 | 129 | 121 | 118 | 125 | 124 | 111 | 120 | 119 | 118 | 117 | 129 | 121 | 109 | 108 | 125 | 112 | 109 | 126 | 121 | 113 | 115 | 110 | 105 | 127 | 124 | 119 | 118 | 114 | 120 | 124 | 115 |     |     |
| 137 | 103 | 125 | 118 | 102 | 101 | 110 | 123 | 117 | 116 | 116 | 95  | 137 | 72  | 84  | 91  | 108 | 100 | 104 | 86  | 144 | 96  | 93  | 142 | 135 | 98  | 104 | 92  | 89  | 82  | 102 | 90  | 123 | 77  | 101 | 142 | 91  | 84  | 108 | 100 | 100 | 106 | 100 | 67  | 113 | 94  | 130 | 92  | 86  | 92  | 108 | 84  |     |
| 140 | 117 | 120 | 126 | 107 | 112 | 123 | 130 | 114 | 127 | 121 | 118 | 139 | 87  | 81  | 81  | 121 | 98  | 95  | 78  | 140 | 99  | 107 | 134 | 137 | 96  | 112 | 104 | 103 | 96  | 105 | 85  | 106 | 99  | 99  | 136 | 87  | 85  | 114 | 74  | 106 | 106 | 109 | 78  | 120 | 114 | 122 | 102 | 99  | 109 | 87  | 55  |     |
| 145 | 118 | 127 | 128 | 85  | 72  | 126 | 130 | 98  | 135 | 96  | 124 | 136 | 83  | 83  | 108 | 99  | 77  | 90  | 84  | 152 | 111 | 84  | 146 | 139 | 94  | 80  | 84  | 94  | 104 | 76  | 110 | 112 | 74  | 78  | 144 | 103 | 86  | 85  | 94  | 100 | 91  | 73  | 92  | 122 | 76  | 141 | 96  | 86  | 92  | 94  | 101 |     |
| 136 | 110 | 104 | 121 | 92  | 93  | 121 | 135 | 94  | 128 | 108 | 121 | 138 | 85  | 94  | 84  | 93  | 73  | 89  | 92  | 148 | 117 | 94  | 135 | 138 | 96  | 88  | 95  | 92  | 101 | 88  | 101 | 115 | 83  | 95  | 139 | 93  | 94  | 94  | 88  | 90  | 91  | 84  | 77  | 115 | 103 | 130 | 86  | 70  | 93  | 90  | 76  |     |
| 136 | 118 | 113 | 124 | 92  | 83  | 133 | 128 | 100 | 138 | 102 | 133 | 136 | 86  | 89  | 101 | 106 | 66  | 104 | 90  | 145 | 111 | 95  | 134 | 128 | 112 | 82  | 99  | 89  | 109 | 84  | 96  | 114 | 83  | 88  | 134 | 96  | 94  | 88  | 89  | 95  | 97  | 77  | 89  | 124 | 100 | 140 | 93  | 77  | 103 | 90  | 94  |     |
| 141 | 97  | 118 | 104 | 121 | 117 | 109 | 124 | 110 | 112 | 121 | 107 | 132 | 94  | 92  | 83  | 111 | 120 | 119 | 102 | 140 | 79  | 107 | 141 | 141 | 111 | 122 | 111 | 101 | 109 | 120 | 95  | 116 | 102 | 107 | 142 | 106 | 97  | 121 | 107 | 98  | 116 | 112 | 87  | 90  | 120 | 128 | 113 | 95  | 105 | 110 | 108 |     |
| 141 | 116 | 122 | 133 | 83  | 97  | 129 | 124 | 107 | 129 | 109 | 120 | 137 | 88  | 65  | 94  | 110 | 99  | 86  | 89  | 151 | 106 | 93  | 142 | 141 | 94  | 114 | 93  | 91  | 73  | 102 | 108 | 125 | 75  | 97  | 140 | 101 | 73  | 122 | 103 | 106 | 94  | 105 | 82  | 120 | 78  | 136 | 103 | 102 | 94  | 104 | 78  |     |
| 148 | 116 | 118 | 126 | 88  | 87  | 128 | 126 | 97  | 128 | 91  | 123 | 131 | 95  | 83  | 101 | 117 | 86  | 120 | 90  | 149 | 117 | 90  | 144 | 136 | 85  | 75  | 86  | 93  | 74  | 91  | 98  | 114 | 92  | 83  | 144 | 93  | 69  | 83  | 107 | 77  | 93  | 80  | 98  | 125 | 97  | 133 | 90  | 86  | 106 | 85  | 91  |     |
| 73  | 136 | 143 | 123 | 149 | 145 | 129 | 131 | 148 | 126 | 148 | 130 | 145 | 135 | 138 | 137 | 136 | 135 | 139 | 149 | 124 | 140 | 145 | 46  | 64  | 144 | 138 | 139 | 140 | 147 | 147 | 134 | 133 | 152 | 147 | 48  | 144 | 137 | 137 | 144 | 134 | 130 | 136 | 138 | 140 | 143 | 96  | 137 | 138 | 144 | 144 | 138 |     |
| 138 | 99  | 114 | 117 | 104 | 99  | 130 | 128 | 94  | 119 | 112 | 123 | 140 | 87  | 93  | 107 | 118 | 89  | 117 | 103 | 143 | 117 | 102 | 138 | 139 | 110 | 109 | 111 | 97  | 92  | 106 | 105 | 127 | 95  | 76  | 138 | 92  | 90  | 115 | 97  | 82  | 105 | 105 | 84  | 113 | 105 | 126 | 86  | 65  | 100 | 93  | 100 |     |
| 149 | 111 | 109 | 134 | 89  | 87  | 131 | 123 | 96  | 125 | 98  | 123 | 137 | 98  | 89  | 97  | 100 | 83  | 91  | 87  | 146 | 116 | 90  | 149 | 141 | 74  | 88  | 82  | 98  | 71  | 79  | 110 | 104 | 75  | 92  | 150 | 90  | 94  | 97  | 99  | 82  | 93  | 85  | 96  | 121 | 95  | 133 | 81  | 92  | 98  | 65  | 76  |     |
| 148 | 109 | 119 | 120 | 106 | 92  | 124 | 134 | 105 | 130 | 100 | 126 | 133 | 94  | 104 | 101 | 112 | 76  | 122 | 106 | 145 | 111 | 90  | 141 | 139 | 100 | 82  | 89  | 100 | 89  | 102 | 105 | 116 | 96  | 108 | 138 | 102 | 103 | 84  | 109 | 86  | 95  | 89  | 85  | 117 | 103 | 130 | 93  | 73  | 99  | 107 | 112 |     |
| 151 | 126 | 124 | 134 | 75  | 69  | 138 | 134 | 114 | 138 | 85  | 130 | 135 | 98  | 108 | 119 | 104 | 73  | 104 | 86  | 150 | 108 | 80  | 149 | 139 | 98  | 52  | 97  | 93  | 110 | 50  | 107 | 109 | 76  | 91  | 147 | 106 | 98  | 70  | 96  | 93  | 84  | 58  | 113 | 132 | 82  | 138 | 93  | 78  | 91  | 102 | 103 |     |
| 141 | 120 | 116 | 122 | 101 | 92  | 127 | 131 | 110 | 131 | 98  | 118 | 130 | 84  | 92  | 101 | 102 | 89  | 97  | 100 | 148 | 110 | 63  | 138 | 138 | 95  | 78  | 102 | 103 | 104 | 77  | 105 | 115 | 93  | 92  | 134 | 110 | 93  | 86  | 103 | 94  | 99  | 77  | 95  | 123 | 98  | 122 | 90  | 65  | 96  | 88  | 100 |     |
| 150 | 109 | 105 | 126 | 102 | 92  | 119 | 126 | 95  | 126 | 105 | 107 | 141 | 95  | 96  | 98  | 110 | 87  | 91  | 82  | 144 | 115 | 77  | 144 | 153 | 102 | 98  | 88  | 102 | 98  | 104 | 111 | 108 | 96  | 92  | 149 | 103 | 103 | 113 | 92  | 90  | 100 | 106 | 97  | 115 | 98  | 127 | 71  | 83  | 104 | 94  | 107 |     |
| 151 | 109 | 129 | 123 | 89  | 100 | 126 | 117 | 102 | 124 | 103 | 121 | 134 | 97  | 86  | 103 | 123 | 110 | 115 | 75  | 148 | 112 | 96  | 150 | 143 | 95  | 109 | 96  | 97  | 83  | 94  | 108 | 118 | 69  | 88  | 148 | 95  | 97  | 108 | 94  | 101 | 114 | 109 | 88  | 124 | 92  | 140 | 97  | 93  | 110 | 98  |     |     |
| 146 | 94  | 123 | 120 | 117 | 105 | 114 | 126 | 101 | 116 | 106 | 111 | 132 | 95  | 104 | 100 | 104 | 84  | 112 | 105 | 140 | 113 | 101 | 143 | 142 | 108 | 96  | 87  | 100 | 89  | 105 | 105 | 109 | 105 | 109 | 143 | 96  | 105 | 99  | 108 | 88  | 96  | 101 | 90  | 110 | 116 | 117 | 90  | 95  | 85  | 86  | 97  | 108 |
| 140 | 118 | 119 | 125 | 81  | 73  | 130 | 131 | 106 | 131 | 89  | 127 | 128 | 92  | 96  | 105 | 116 | 93  | 111 | 87  | 141 | 111 | 76  | 143 | 139 | 98  | 73  | 90  | 97  | 97  | 79  | 105 | 103 | 79  | 80  | 143 | 103 | 95  | 86  | 97  | 85  | 86  | 80  | 93  | 127 | 85  | 140 | 87  | 80  | 106 | 96  | 94  |     |
| 139 | 95  | 120 | 102 | 108 | 115 | 109 | 115 | 93  | 106 | 127 | 103 | 139 | 72  | 81  | 77  | 110 | 102 | 90  | 102 | 139 | 114 | 104 | 138 | 135 | 89  | 114 | 98  | 111 | 80  | 104 | 108 | 117 | 89  | 100 | 141 | 96  | 95  | 124 | 96  | 94  | 109 | 106 | 66  | 117 | 111 | 114 | 91  | 97  | 98  | 82  | 70  |     |
| 142 | 114 | 111 | 128 | 99  | 83  | 124 | 130 | 101 | 125 | 105 | 116 | 136 | 102 | 93  | 91  | 111 | 64  | 95  | 95  | 145 | 121 | 78  | 140 | 144 | 87  | 83  | 92  | 103 | 96  | 94  | 106 | 109 | 95  | 93  | 141 | 105 | 91  | 92  | 97  | 86  | 89  | 97  | 89  | 129 | 96  | 128 | 81  | 84  | 102 | 82  | 97  |     |
| 146 | 112 | 127 | 129 | 97  | 84  | 123 | 127 | 98  | 125 | 134 | 93  | 93  | 98  | 121 | 81  | 109 | 92  | 146 | 112 | 94  | 145 | 141 | 95  | 89  | 90  | 95  | 96  | 100 | 109 | 122 | 93  | 91  | 148 | 102 | 89  | 95  | 102 | 93  | 86  | 101 | 99  | 128 | 94  | 140 | 87  | 76  | 112 |     |     |     |     |     |

|     |     |     |     |     |     |     |     |     |     |     |     |     |     |     |     |     |     |     |     |     |     |     |     |     |     |     |     |     |     |     |     |     |     |     |     |     |     |     |     |     |     |     |     |     |     |     |     |     |     |     |     |
|-----|-----|-----|-----|-----|-----|-----|-----|-----|-----|-----|-----|-----|-----|-----|-----|-----|-----|-----|-----|-----|-----|-----|-----|-----|-----|-----|-----|-----|-----|-----|-----|-----|-----|-----|-----|-----|-----|-----|-----|-----|-----|-----|-----|-----|-----|-----|-----|-----|-----|-----|-----|
| 146 | 109 | 129 | 127 | 86  | 84  | 130 | 123 | 108 | 123 | 98  | 126 | 130 | 98  | 79  | 111 | 108 | 103 | 110 | 94  | 144 | 118 | 90  | 144 | 140 | 93  | 94  | 93  | 102 | 85  | 87  | 107 | 113 | 86  | 91  | 141 | 104 | 70  | 105 | 98  | 101 | 92  | 97  | 97  | 127 | 70  | 132 | 104 | 104 | 106 | 96  | 92  |
| 143 | 113 | 133 | 130 | 90  | 85  | 130 | 124 | 127 | 126 | 103 | 119 | 136 | 97  | 82  | 109 | 108 | 100 | 86  | 91  | 149 | 111 | 83  | 147 | 146 | 88  | 99  | 76  | 95  | 89  | 82  | 112 | 107 | 74  | 99  | 144 | 108 | 84  | 105 | 82  | 105 | 98  | 89  | 94  | 123 | 69  | 133 | 104 | 99  | 90  | 112 | 99  |
| 108 | 119 | 141 | 114 | 145 | 137 | 109 | 109 | 135 | 121 | 147 | 103 | 142 | 119 | 127 | 114 | 122 | 136 | 122 | 130 | 109 | 130 | 135 | 120 | 111 | 134 | 136 | 122 | 130 | 131 | 134 | 129 | 120 | 137 | 131 | 119 | 129 | 128 | 135 | 137 | 122 | 139 | 138 | 121 | 127 | 140 | 111 | 120 | 126 | 125 | 120 | 134 |
| 113 | 119 | 136 | 96  | 141 | 140 | 105 | 101 | 129 | 114 | 148 | 98  | 146 | 118 | 122 | 118 | 117 | 130 | 127 | 136 | 117 | 126 | 137 | 112 | 105 | 134 | 136 | 119 | 132 | 128 | 140 | 132 | 118 | 141 | 137 | 118 | 124 | 118 | 143 | 129 | 123 | 129 | 133 | 123 | 124 | 137 | 101 | 121 | 130 | 129 | 126 | 132 |
| 151 | 100 | 117 | 120 | 99  | 84  | 120 | 122 | 102 | 118 | 116 | 118 | 138 | 91  | 78  | 104 | 107 | 83  | 93  | 95  | 143 | 108 | 87  | 143 | 138 | 75  | 83  | 82  | 89  | 65  | 92  | 111 | 103 | 76  | 90  | 144 | 94  | 86  | 92  | 86  | 81  | 75  | 80  | 81  | 111 | 78  | 125 | 92  | 100 | 105 | 93  | 84  |
| 148 | 107 | 124 | 120 | 111 | 108 | 117 | 115 | 110 | 117 | 114 | 117 | 141 | 79  | 92  | 83  | 113 | 101 | 107 | 66  | 148 | 99  | 100 | 144 | 142 | 100 | 107 | 112 | 101 | 92  | 99  | 98  | 119 | 78  | 96  | 142 | 94  | 100 | 101 | 92  | 102 | 120 | 107 | 74  | 115 | 110 | 125 | 100 | 83  | 92  | 99  | 84  |
| 132 | 109 | 132 | 127 | 116 | 108 | 117 | 128 | 129 | 119 | 121 | 120 | 134 | 95  | 109 | 88  | 124 | 108 | 104 | 99  | 136 | 109 | 96  | 140 | 144 | 111 | 108 | 109 | 106 | 108 | 103 | 109 | 123 | 89  | 95  | 140 | 116 | 109 | 107 | 111 | 119 | 121 | 106 | 82  | 121 | 108 | 129 | 108 | 95  | 103 | 110 | 92  |
| 145 | 105 | 103 | 119 | 121 | 106 | 119 | 115 | 108 | 117 | 132 | 116 | 133 | 84  | 92  | 96  | 97  | 96  | 91  | 101 | 143 | 100 | 97  | 148 | 144 | 96  | 110 | 94  | 106 | 92  | 108 | 99  | 91  | 97  | 100 | 145 | 103 | 98  | 117 | 94  | 105 | 109 | 111 | 92  | 94  | 97  | 124 | 102 | 104 | 95  | 81  | 85  |
| 143 | 116 | 123 | 131 | 101 | 106 | 118 | 127 | 121 | 128 | 113 | 105 | 140 | 93  | 78  | 94  | 112 | 105 | 84  | 88  | 149 | 105 | 91  | 147 | 142 | 83  | 104 | 104 | 98  | 75  | 97  | 111 | 128 | 77  | 104 | 145 | 109 | 80  | 118 | 100 | 107 | 101 | 102 | 75  | 124 | 91  | 134 | 105 | 97  | 95  | 94  | 85  |
| 130 | 104 | 120 | 92  | 140 | 131 | 95  | 103 | 114 | 111 | 134 | 91  | 139 | 110 | 102 | 103 | 108 | 112 | 118 | 126 | 128 | 120 | 124 | 130 | 132 | 117 | 132 | 111 | 130 | 107 | 136 | 130 | 118 | 125 | 127 | 128 | 123 | 108 | 131 | 133 | 100 | 119 | 127 | 106 | 106 | 123 | 111 | 114 | 123 | 114 | 115 | 124 |
| 151 | 104 | 116 | 120 | 94  | 94  | 118 | 125 | 103 | 118 | 106 | 113 | 137 | 74  | 82  | 91  | 115 | 91  | 99  | 81  | 143 | 107 | 85  | 149 | 142 | 81  | 94  | 96  | 96  | 69  | 92  | 103 | 123 | 57  | 88  | 148 | 98  | 81  | 101 | 92  | 98  | 97  | 92  | 74  | 117 | 88  | 129 | 91  | 77  | 93  | 87  | 74  |
| 152 | 120 | 124 | 131 | 94  | 105 | 127 | 117 | 100 | 126 | 104 | 114 | 138 | 103 | 93  | 90  | 113 | 104 | 86  | 75  | 146 | 109 | 102 | 144 | 142 | 93  | 103 | 86  | 110 | 71  | 93  | 114 | 106 | 84  | 103 | 148 | 99  | 91  | 104 | 96  | 96  | 95  | 102 | 102 | 122 | 87  | 127 | 92  | 114 | 96  | 94  | 88  |
| 144 | 118 | 132 | 133 | 81  | 86  | 140 | 133 | 105 | 137 | 91  | 134 | 135 | 94  | 93  | 93  | 123 | 96  | 105 | 64  | 146 | 117 | 102 | 145 | 144 | 100 | 100 | 102 | 97  | 110 | 83  | 104 | 123 | 63  | 83  | 145 | 99  | 85  | 103 | 86  | 102 | 106 | 96  | 87  | 139 | 88  | 143 | 94  | 86  | 107 | 89  | 88  |







|     |     |     |     |     |     |     |     |     |     |     |     |     |     |     |     |     |     |     |     |     |     |     |     |     |     |     |     |     |     |     |     |     |     |     |     |     |     |     |     |     |     |     |     |     |     |     |     |     |     |     |     |
|-----|-----|-----|-----|-----|-----|-----|-----|-----|-----|-----|-----|-----|-----|-----|-----|-----|-----|-----|-----|-----|-----|-----|-----|-----|-----|-----|-----|-----|-----|-----|-----|-----|-----|-----|-----|-----|-----|-----|-----|-----|-----|-----|-----|-----|-----|-----|-----|-----|-----|-----|-----|
| 126 | 97  | 134 | 122 | 70  | 98  | 117 | 120 | 107 | 107 | 118 | 74  | 88  | 92  | 88  | 87  | 106 | 88  | 110 | 117 | 68  | 103 | 131 | 94  | 82  | 104 | 119 | 117 | 101 | 107 | 80  | 145 | 88  | 64  | 60  | 95  | 82  | 111 | 102 | 114 | 91  | 116 | 79  | 87  | 115 | 100 | 99  | 113 | 89  | 97  | 89  | 107 |
| 114 | 123 | 137 | 120 | 108 | 111 | 125 | 123 | 106 | 131 | 132 | 117 | 116 | 123 | 122 | 114 | 125 | 116 | 119 | 117 | 113 | 125 | 124 | 123 | 112 | 124 | 127 | 105 | 122 | 118 | 124 | 144 | 120 | 117 | 114 | 120 | 120 | 123 | 128 | 122 | 125 | 114 | 116 | 123 | 109 | 114 | 127 | 123 | 125 | 130 | 113 | 126 |
| 115 | 107 | 145 | 123 | 127 | 127 | 109 | 122 | 132 | 131 | 105 | 122 | 114 | 127 | 111 | 126 | 130 | 114 | 132 | 142 | 130 | 117 | 145 | 123 | 128 | 118 | 105 | 147 | 115 | 127 | 119 | 149 | 120 | 130 | 128 | 123 | 127 | 105 | 114 | 127 | 121 | 126 | 131 | 125 | 129 | 127 | 128 | 115 | 122 | 118 | 115 | 121 |
| 110 | 113 | 147 | 129 | 130 | 134 | 113 | 121 | 135 | 114 | 113 | 126 | 120 | 126 | 111 | 130 | 126 | 120 | 129 | 140 | 131 | 116 | 144 | 118 | 128 | 119 | 108 | 142 | 117 | 130 | 117 | 149 | 121 | 127 | 130 | 120 | 131 | 107 | 118 | 133 | 120 | 128 | 135 | 127 | 134 | 128 | 130 | 118 | 123 | 120 | 117 | 123 |
| 111 | 113 | 141 | 124 | 112 | 105 | 119 | 116 | 96  | 131 | 132 | 111 | 112 | 111 | 116 | 103 | 129 | 112 | 97  | 106 | 77  | 123 | 115 | 119 | 107 | 126 | 129 | 106 | 121 | 116 | 114 | 141 | 107 | 100 | 113 | 111 | 109 | 120 | 121 | 123 | 115 | 121 | 114 | 128 | 109 | 97  | 121 | 119 | 120 | 118 | 117 | 122 |
| 86  | 104 | 144 | 118 | 123 | 126 | 97  | 109 | 126 | 95  | 98  | 110 | 110 | 119 | 106 | 119 | 116 | 110 | 124 | 129 | 113 | 99  | 147 | 102 | 118 | 106 | 100 | 139 | 97  | 116 | 104 | 146 | 112 | 113 | 119 | 107 | 117 | 81  | 98  | 109 | 115 | 129 | 117 | 107 | 119 | 119 | 107 | 93  | 110 | 105 | 116 | 107 |
| 121 | 125 | 129 | 117 | 121 | 121 | 119 | 119 | 100 | 134 | 128 | 121 | 113 | 123 | 126 | 118 | 121 | 113 | 116 | 118 | 119 | 128 | 113 | 119 | 119 | 120 | 129 | 103 | 124 | 116 | 118 | 141 | 129 | 115 | 124 | 115 | 118 | 126 | 127 | 120 | 128 | 100 | 117 | 120 | 123 | 114 | 120 | 127 | 123 | 133 | 114 | 122 |
| 121 | 125 | 129 | 117 | 121 | 121 | 119 | 119 | 100 | 134 | 128 | 121 | 113 | 123 | 126 | 118 | 121 | 113 | 116 | 118 | 119 | 128 | 113 | 119 | 119 | 120 | 129 | 103 | 124 | 116 | 118 | 141 | 129 | 115 | 124 | 115 | 118 | 126 | 127 | 120 | 128 | 100 | 117 | 120 | 123 | 114 | 120 | 127 | 123 | 133 | 114 | 122 |
| 121 | 125 | 129 | 117 | 121 | 121 | 119 | 119 | 100 | 134 | 128 | 121 | 113 | 123 | 126 | 118 | 121 | 113 | 116 | 118 | 119 | 128 | 113 | 119 | 119 | 120 | 129 | 103 | 124 | 116 | 118 | 141 | 129 | 115 | 124 | 115 | 118 | 126 | 127 | 120 | 128 | 100 | 117 | 120 | 123 | 114 | 120 | 127 | 123 | 133 | 114 | 122 |
| 122 | 125 | 129 | 117 | 121 | 121 | 119 | 119 | 100 | 134 | 128 | 121 | 113 | 123 | 126 | 118 | 121 | 113 | 116 | 118 | 119 | 128 | 113 | 119 | 119 | 120 | 129 | 103 | 124 | 116 | 118 | 142 | 129 | 115 | 124 | 115 | 118 | 126 | 127 | 120 | 128 | 100 | 117 | 120 | 123 | 114 | 120 | 127 | 123 | 133 | 114 | 122 |
| 121 | 125 | 129 | 117 | 121 | 121 | 119 | 119 | 100 | 134 | 128 | 121 | 113 | 123 | 126 | 118 | 121 | 113 | 116 | 118 | 119 | 128 | 113 | 119 | 119 | 120 | 129 | 103 | 124 | 116 | 118 | 141 | 129 | 115 | 124 | 115 | 118 | 126 | 127 | 120 | 128 | 100 | 117 | 120 | 123 | 114 | 120 | 127 | 123 | 133 | 114 | 122 |
| 120 | 128 | 145 | 128 | 131 | 135 | 121 | 126 | 131 | 128 | 127 | 128 | 131 | 131 | 132 | 132 | 140 | 131 | 136 | 135 | 126 | 126 | 132 | 134 | 125 | 128 | 131 | 128 | 132 | 122 | 136 | 146 | 122 | 129 | 127 | 135 | 131 | 122 | 124 | 125 | 124 | 135 | 135 | 126 | 132 | 122 | 125 | 128 | 134 | 131 | 127 | 127 |
| 143 | 137 | 114 | 137 | 138 | 142 | 147 | 144 | 127 | 135 | 142 | 140 | 139 | 133 | 143 | 139 | 142 | 139 | 130 | 100 | 129 | 142 | 97  | 136 | 140 | 138 | 136 | 109 | 141 | 137 | 139 | 133 | 143 | 138 | 139 | 138 | 132 | 143 | 139 | 148 | 143 | 118 | 139 | 138 | 115 | 139 | 129 | 142 | 139 | 133 | 137 | 143 |
| 91  | 92  | 147 | 105 | 121 | 116 | 82  | 107 | 128 | 86  | 79  | 102 | 96  | 108 | 97  | 104 | 106 | 96  | 129 | 141 | 115 | 93  | 141 | 101 | 112 | 95  | 85  | 143 | 84  | 112 | 103 | 149 | 107 | 105 | 117 | 78  | 94  | 114 | 102 | 128 | 118 | 106 | 121 | 99  | 115 | 92  | 104 | 102 | 115 | 101 |     |     |
| 94  | 103 | 150 | 122 | 123 | 129 | 115 | 123 | 131 | 110 | 108 | 118 | 105 | 125 | 114 | 127 | 130 | 105 | 121 | 138 | 127 | 107 | 145 | 123 | 124 | 121 | 102 | 144 | 104 | 124 | 122 | 148 | 112 | 117 | 120 | 119 | 132 | 87  | 109 | 131 | 118 | 133 | 123 | 124 | 121 | 117 | 125 | 107 | 113 | 115 | 108 | 116 |
| 112 | 122 | 126 | 78  | 91  | 69  | 94  | 78  | 99  | 121 | 98  | 100 | 92  | 94  | 112 | 87  | 83  | 92  | 119 | 120 | 106 | 105 | 115 | 101 | 82  | 109 | 130 | 102 | 97  | 77  | 107 | 143 | 95  | 92  | 97  | 104 | 78  | 122 | 113 | 82  | 103 | 115 | 81  | 88  | 125 | 97  | 88  | 106 | 100 | 114 | 112 | 88  |
| 113 | 123 | 126 | 80  | 92  | 70  | 96  | 80  | 100 | 122 | 99  | 101 | 92  | 95  | 112 | 88  | 84  | 92  | 120 | 120 | 106 | 105 | 117 | 101 | 83  | 110 | 131 | 104 | 97  | 78  | 107 | 143 | 97  | 92  | 98  | 105 | 78  | 122 | 113 | 84  | 105 | 116 | 82  | 88  | 126 | 98  | 89  | 107 | 101 | 114 | 113 | 90  |
| 112 | 122 | 126 | 78  | 91  | 69  | 94  | 78  | 99  | 121 | 98  | 100 | 92  | 94  | 112 | 87  | 83  | 92  | 119 | 120 | 106 | 105 | 115 | 101 | 82  | 109 | 130 | 102 | 97  | 77  | 107 | 143 | 95  | 92  | 97  | 104 | 78  | 122 | 113 | 82  | 103 | 115 | 81  | 88  | 125 | 97  | 88  | 106 | 100 | 114 | 112 | 88  |
| 112 | 122 | 126 | 78  | 91  | 69  | 94  | 78  | 99  | 121 | 98  | 100 | 92  | 94  | 112 | 87  | 83  | 92  | 119 | 120 | 106 | 105 | 115 | 101 | 82  | 109 | 130 | 102 | 97  | 77  | 107 | 143 | 95  | 92  | 97  | 104 | 78  | 122 | 113 | 82  | 103 | 115 | 81  | 88  | 125 | 97  | 88  | 106 | 100 | 114 | 112 | 88  |
| 112 | 122 | 126 | 78  | 91  | 69  | 94  | 78  | 99  | 121 | 98  | 100 | 92  | 94  | 112 | 87  | 83  | 92  | 119 | 120 | 106 | 105 | 115 | 101 | 82  | 109 | 130 | 102 | 97  | 77  | 107 | 143 | 95  | 92  | 97  | 104 | 78  | 122 | 113 | 82  | 103 | 115 | 81  | 88  | 125 | 97  | 88  | 106 | 100 | 114 | 112 | 88  |
| 112 | 122 | 126 | 78  | 91  | 69  | 94  | 78  | 99  | 121 | 98  | 100 | 92  | 94  | 112 | 87  | 83  | 92  | 119 | 120 | 106 | 105 | 115 | 101 | 82  | 109 | 130 | 102 | 97  | 77  | 107 | 143 | 95  | 92  | 97  | 104 | 78  | 122 | 113 | 82  | 103 | 115 | 81  | 88  | 125 | 97  | 88  | 106 | 100 | 114 | 112 | 88  |
| 112 | 122 | 126 | 78  | 91  | 69  | 94  | 78  | 99  | 121 | 98  | 100 | 92  | 94  | 112 | 87  | 83  | 92  | 119 | 120 | 106 | 105 | 115 | 101 | 82  | 109 | 130 | 102 | 97  | 77  | 107 | 143 | 95  | 92  | 97  | 104 | 78  | 122 | 113 | 82  | 103 | 115 | 81  | 88  | 125 | 97  | 88  | 106 | 100 | 114 | 112 | 88  |
| 112 | 122 | 126 | 78  | 91  | 69  | 94  | 78  | 99  | 121 | 98  | 100 | 92  | 94  | 112 | 87  | 83  | 92  | 119 | 120 | 106 | 105 | 115 | 101 | 82  | 109 | 130 | 102 | 97  | 77  | 107 | 143 | 95  | 92  | 97  | 104 | 78  | 122 | 113 | 82  | 103 | 115 | 81  | 88  | 125 | 97  | 88  | 106 | 100 | 114 | 112 | 88  |
| 112 | 122 | 126 | 78  | 91  | 69  | 94  | 78  | 99  | 121 | 98  | 100 | 92  | 94  | 112 | 87  | 83  | 92  | 119 | 120 | 106 | 105 | 115 | 101 | 82  | 109 | 130 | 102 | 97  | 77  | 107 | 143 | 95  | 92  | 97  | 104 | 78  | 122 | 113 | 82  | 103 | 115 | 81  | 88  | 125 | 97  | 88  | 106 | 100 | 114 | 112 | 88  |
| 112 | 122 | 126 | 78  | 91  | 69  | 94  | 78  | 99  | 121 | 98  | 100 | 92  | 94  | 112 | 87  | 83  | 92  | 119 | 120 | 106 | 105 | 115 | 101 | 82  | 109 | 130 | 102 | 97  | 77  | 107 | 143 | 95  | 92  | 97  | 104 | 78  | 122 | 113 | 82  | 103 | 115 | 81  | 88  | 125 | 97  | 88  | 106 | 100 | 114 | 112 | 88  |
| 112 | 122 | 126 | 78  | 91  | 69  | 94  | 78  | 99  | 121 | 98  | 100 | 92  | 94  | 112 | 87  | 83  | 92  | 119 | 120 | 106 | 105 | 115 | 101 | 82  | 109 | 130 | 102 | 97  | 77  | 107 | 143 | 95  | 92  | 97  | 104 | 78  | 122 | 113 | 82  | 103 | 115 | 81  | 88  | 125 | 97  | 88  | 106 | 100 | 114 | 112 | 88  |
| 112 | 122 | 126 | 78  | 91  | 69  | 94  | 78  | 99  | 121 | 98  | 100 | 92  | 94  | 112 | 87  | 83  | 92  | 119 | 120 | 106 | 105 | 115 | 101 | 82  | 109 | 130 | 102 | 97  | 77  | 107 | 143 | 95  | 92  | 97  | 104 | 78  | 122 | 113 | 82  | 103 | 115 | 81  | 88  | 125 | 97  | 88  | 106 | 100 | 114 | 112 | 88  |
| 112 | 122 | 126 | 78  | 91  | 69  | 94  | 78  | 99  | 121 | 98  | 100 | 92  | 94  | 112 | 87  | 83  | 92  | 119 | 120 | 106 | 105 | 115 | 101 | 82  | 109 | 130 | 102 | 97  | 77  | 107 | 143 | 95  | 92  | 97  | 104 | 78  | 122 | 113 | 82  | 103 | 115 | 81  | 88  | 125 | 97  | 88  | 106 | 100 | 114 | 112 | 88  |
| 112 | 122 | 126 | 78  | 91  | 69  | 94  | 78  | 99  | 121 | 98  | 100 | 92  | 94  | 112 | 87  | 83  | 92  | 119 | 120 | 106 | 105 | 115 | 101 | 82  | 109 | 130 | 102 | 97  | 77  | 107 | 143 | 95  | 92  | 97  | 104 | 78  | 122 | 113 | 82  | 103 | 115 | 81  | 88  | 125 | 97  | 88  | 106 | 100 | 114 | 112 | 88  |
| 112 | 122 | 126 | 78  | 91  | 69  | 94  | 78  | 99  | 121 | 98  | 100 | 92  | 94  | 112 | 87  | 83  | 92  | 119 | 120 | 106 | 105 | 115 | 101 | 82  | 109 | 130 | 102 | 97  | 77  | 107 | 143 | 95  | 92  | 97  | 104 | 78  | 122 | 113 | 82  | 103 | 115 | 81  | 88  | 125 | 97  | 88  | 106 | 100 | 114 | 112 | 88  |
| 112 | 122 | 126 | 78  | 91  | 69  | 94  | 78  | 99  | 121 | 98  | 100 | 92  | 94  | 112 | 87  | 83  | 92  | 119 | 120 | 106 | 105 | 115 | 101 | 82  | 109 | 13  |     |     |     |     |     |     |     |     |     |     |     |     |     |     |     |     |     |     |     |     |     |     |     |     |     |

|     |     |     |     |     |     |     |     |     |     |     |     |     |     |     |     |     |     |     |     |     |     |     |     |     |     |     |     |     |     |     |     |     |     |     |     |     |     |     |     |     |     |     |     |     |     |     |     |     |     |     |     |     |     |
|-----|-----|-----|-----|-----|-----|-----|-----|-----|-----|-----|-----|-----|-----|-----|-----|-----|-----|-----|-----|-----|-----|-----|-----|-----|-----|-----|-----|-----|-----|-----|-----|-----|-----|-----|-----|-----|-----|-----|-----|-----|-----|-----|-----|-----|-----|-----|-----|-----|-----|-----|-----|-----|-----|
| 132 | 132 | 145 | 136 | 133 | 141 | 134 | 134 | 138 | 133 | 135 | 138 | 135 | 140 | 137 | 141 | 141 | 135 | 143 | 140 | 133 | 131 | 136 | 133 | 138 | 133 | 133 | 136 | 135 | 139 | 135 | 151 | 131 | 134 | 134 | 136 | 136 | 128 | 130 | 134 | 139 | 132 | 135 | 125 | 141 | 137 | 139 | 136 | 138 | 136 | 132 | 137 |     |     |
| 105 | 99  | 134 | 103 | 88  | 91  | 96  | 97  | 105 | 99  | 111 | 88  | 97  | 63  | 101 | 72  | 90  | 97  | 123 | 127 | 96  | 87  | 113 | 93  | 76  | 75  | 103 | 117 | 94  | 86  | 95  | 139 | 75  | 92  | 80  | 97  | 80  | 108 | 82  | 103 | 98  | 118 | 70  | 89  | 115 | 72  | 87  | 83  | 85  | 86  | 94  | 88  |     |     |
| 92  | 105 | 137 | 95  | 76  | 88  | 81  | 97  | 116 | 106 | 85  | 100 | 87  | 99  | 101 | 86  | 75  | 87  | 119 | 118 | 100 | 89  | 126 | 87  | 81  | 77  | 104 | 119 | 80  | 69  | 105 | 140 | 80  | 88  | 79  | 111 | 86  | 103 | 89  | 94  | 78  | 117 | 87  | 70  | 102 | 84  | 81  | 83  | 94  | 89  | 92  | 65  |     |     |
| 118 | 113 | 130 | 101 | 81  | 107 | 114 | 97  | 113 | 122 | 114 | 80  | 78  | 91  | 99  | 91  | 85  | 78  | 111 | 119 | 90  | 88  | 124 | 98  | 84  | 95  | 118 | 114 | 97  | 77  | 96  | 146 | 92  | 74  | 79  | 110 | 67  | 114 | 99  | 99  | 99  | 108 | 81  | 93  | 112 | 91  | 81  | 108 | 84  | 101 | 83  | 94  |     |     |
| 115 | 111 | 131 | 119 | 98  | 95  | 110 | 113 | 55  | 113 | 115 | 91  | 108 | 111 | 104 | 88  | 124 | 108 | 107 | 105 | 98  | 106 | 127 | 108 | 124 | 104 | 105 | 114 | 112 | 111 | 105 | 139 | 111 | 129 | 119 | 103 | 109 | 109 | 108 | 109 | 116 | 126 | 101 | 103 | 123 | 108 | 121 | 99  | 93  | 106 | 111 | 110 |     |     |
| 109 | 86  | 136 | 110 | 99  | 108 | 103 | 106 | 106 | 87  | 96  | 77  | 85  | 105 | 83  | 96  | 101 | 85  | 124 | 123 | 92  | 66  | 138 | 67  | 96  | 70  | 89  | 139 | 80  | 112 | 75  | 137 | 101 | 97  | 101 | 100 | 100 | 92  | 74  | 109 | 97  | 126 | 96  | 95  | 123 | 100 | 98  | 77  | 73  | 66  | 120 | 99  |     |     |
| 109 | 116 | 132 | 79  | 98  | 96  | 79  | 88  | 102 | 116 | 90  | 92  | 91  | 110 | 104 | 93  | 96  | 91  | 127 | 128 | 116 | 100 | 124 | 101 | 105 | 93  | 112 | 111 | 91  | 87  | 101 | 146 | 105 | 109 | 108 | 106 | 91  | 117 | 101 | 117 | 100 | 113 | 92  | 89  | 125 | 104 | 95  | 90  | 89  | 104 | 119 | 86  |     |     |
| 94  | 109 | 136 | 96  | 102 | 90  | 94  | 97  | 119 | 116 | 92  | 105 | 76  | 94  | 93  | 96  | 94  | 76  | 126 | 142 | 113 | 83  | 127 | 88  | 81  | 81  | 110 | 130 | 69  | 79  | 100 | 144 | 81  | 91  | 96  | 102 | 78  | 94  | 80  | 96  | 92  | 129 | 92  | 90  | 127 | 86  | 78  | 84  | 90  | 102 | 89  |     |     |     |
| 151 | 146 | 61  | 148 | 142 | 147 | 148 | 149 | 140 | 145 | 151 | 144 | 143 | 141 | 147 | 148 | 144 | 143 | 136 | 133 | 145 | 148 | 120 | 144 | 140 | 143 | 148 | 136 | 145 | 144 | 145 | 83  | 145 | 140 | 143 | 144 | 143 | 144 | 143 | 153 | 141 | 145 | 152 | 137 | 143 | 140 | 129 | 144 | 140 | 152 | 148 | 145 | 140 | 151 |
| 114 | 118 | 138 | 120 | 119 | 114 | 114 | 117 | 121 | 125 | 115 | 114 | 109 | 105 | 110 | 110 | 119 | 109 | 117 | 124 | 145 | 108 | 111 | 110 | 104 | 115 | 123 | 112 | 101 | 99  | 119 | 145 | 101 | 112 | 110 | 122 | 106 | 112 | 109 | 119 | 108 | 114 | 111 | 119 | 121 | 96  | 99  | 111 | 117 | 111 | 79  | 106 |     |     |
| 93  | 82  | 143 | 102 | 93  | 97  | 82  | 97  | 118 | 93  | 87  | 94  | 97  | 103 | 92  | 101 | 103 | 97  | 135 | 138 | 114 | 85  | 130 | 90  | 100 | 60  | 83  | 125 | 79  | 92  | 78  | 146 | 76  | 107 | 111 | 92  | 102 | 91  | 84  | 91  | 82  | 132 | 86  | 88  | 118 | 93  | 107 | 84  | 94  | 95  | 107 | 93  |     |     |
| 147 | 140 | 109 | 139 | 149 | 142 | 143 | 142 | 133 | 141 | 147 | 142 | 141 | 137 | 145 | 142 | 147 | 141 | 132 | 109 | 139 | 151 | 116 | 135 | 145 | 138 | 138 | 121 | 146 | 147 | 139 | 131 | 147 | 138 | 143 | 140 | 138 | 150 | 136 | 144 | 145 | 130 | 145 | 146 | 125 | 142 | 134 | 146 | 135 | 134 | 141 | 142 |     |     |
| 146 | 135 | 116 | 140 | 145 | 141 | 144 | 142 | 133 | 136 | 143 | 141 | 147 | 127 | 138 | 139 | 147 | 147 | 139 | 112 | 136 | 150 | 110 | 136 | 137 | 140 | 136 | 114 | 143 | 147 | 140 | 137 | 143 | 136 | 138 | 140 | 140 | 143 | 135 | 148 | 143 | 129 | 143 | 147 | 124 | 135 | 137 | 139 | 138 | 128 | 141 | 141 |     |     |
| 109 | 102 | 133 | 103 | 63  | 94  | 83  | 76  | 123 | 95  | 102 | 80  | 100 | 104 | 93  | 100 | 95  | 100 | 131 | 133 | 100 | 102 | 127 | 95  | 91  | 87  | 108 | 129 | 99  | 89  | 88  | 146 | 88  | 98  | 110 | 99  | 110 | 101 | 76  | 79  | 125 | 95  | 82  | 111 | 98  | 96  | 94  | 96  | 112 | 111 | 94  |     |     |     |
| 94  | 75  | 149 | 107 | 107 | 102 | 89  | 95  | 112 | 79  | 94  | 93  | 103 | 104 | 81  | 111 | 114 | 103 | 133 | 133 | 101 | 84  | 134 | 75  | 99  | 76  | 77  | 133 | 88  | 118 | 71  | 145 | 100 | 113 | 115 | 90  | 115 | 83  | 80  | 111 | 97  | 135 | 98  | 99  | 120 | 104 | 112 | 80  | 88  | 82  | 122 | 114 |     |     |
| 88  | 95  | 128 | 95  | 97  | 82  | 64  | 77  | 98  | 105 | 78  | 73  | 95  | 83  | 83  | 86  | 103 | 95  | 123 | 126 | 107 | 97  | 127 | 83  | 98  | 93  | 95  | 115 | 91  | 93  | 83  | 140 | 101 | 102 | 109 | 79  | 108 | 93  | 102 | 85  | 103 | 116 | 90  | 92  | 119 | 92  | 104 | 84  | 95  | 99  | 111 | 93  |     |     |
| 96  | 98  | 140 | 71  | 105 | 76  | 68  | 69  | 105 | 108 | 74  | 87  | 87  | 97  | 93  | 83  | 108 | 87  | 128 | 127 | 103 | 97  | 122 | 82  | 104 | 103 | 101 | 122 | 83  | 81  | 93  | 141 | 104 | 103 | 115 | 95  | 108 | 95  | 90  | 116 | 99  | 124 | 93  | 119 | 119 | 89  | 103 | 94  | 92  | 89  | 101 | 91  |     |     |
| 108 | 99  | 135 | 97  | 76  | 83  | 86  | 97  | 120 | 109 | 93  | 76  | 108 | 86  | 85  | 87  | 106 | 108 | 125 | 135 | 89  | 89  | 106 | 116 | 94  | 63  | 96  | 121 | 115 | 104 | 79  | 81  | 152 | 68  | 71  | 67  | 97  | 87  | 88  | 116 | 99  | 76  | 59  | 130 | 76  | 82  | 118 | 82  | 96  | 104 | 101 | 109 | 73  |     |
| 95  | 85  | 141 | 101 | 107 | 100 | 80  | 91  | 118 | 87  | 86  | 104 | 98  | 101 | 93  | 93  | 110 | 98  | 136 | 141 | 108 | 90  | 137 | 82  | 108 | 84  | 94  | 132 | 87  | 103 | 95  | 144 | 88  | 112 | 117 | 101 | 108 | 84  | 75  | 106 | 95  | 130 | 99  | 88  | 117 | 102 | 105 | 76  | 88  | 84  | 120 | 102 |     |     |
| 114 | 109 | 138 | 115 | 117 | 115 | 106 | 108 | 114 | 114 | 109 | 105 | 86  | 87  | 110 | 106 | 119 | 86  | 127 | 120 | 107 | 102 | 116 | 95  | 99  | 104 | 113 | 119 | 97  | 104 | 102 | 138 | 115 | 107 | 106 | 110 | 82  | 107 | 91  | 126 | 108 | 115 | 103 | 102 | 129 | 90  | 85  | 110 | 101 | 96  | 95  | 108 |     |     |
| 118 | 105 | 129 | 129 | 119 | 111 | 115 | 119 | 115 | 107 | 118 | 104 | 100 | 118 | 103 | 107 | 115 | 100 | 113 | 119 | 100 | 119 | 119 | 105 | 128 | 101 | 111 | 119 | 104 | 117 | 106 | 137 | 121 | 127 | 121 | 115 | 109 | 117 | 115 | 112 | 118 | 114 | 112 | 97  | 121 | 123 | 106 | 110 | 112 | 115 | 114 | 116 | 125 |     |
| 84  | 90  | 143 | 91  | 88  | 90  | 84  | 87  | 123 | 104 | 84  | 100 | 86  | 93  | 101 | 89  | 87  | 86  | 130 | 145 | 107 | 76  | 131 | 90  | 73  | 77  | 104 | 137 | 67  | 77  | 102 | 148 | 71  | 89  | 91  | 99  | 103 | 85  | 78  | 95  | 83  | 131 | 92  | 87  | 109 | 77  | 99  | 74  | 83  | 83  | 102 | 75  |     |     |
| 84  | 97  | 139 | 104 | 99  | 99  | 100 | 111 | 122 | 100 | 94  | 94  | 69  | 105 | 75  | 100 | 97  | 69  | 114 | 127 | 88  | 94  | 137 | 99  | 104 | 93  | 99  | 129 | 72  | 99  | 103 | 133 | 75  | 96  | 107 | 106 | 110 | 87  | 96  | 108 | 103 | 131 | 100 | 99  | 108 | 101 | 99  | 78  | 95  | 88  | 107 | 97  |     |     |
| 145 | 136 | 116 | 146 | 146 | 145 | 149 | 148 | 135 | 141 | 147 | 143 | 143 | 135 | 147 | 142 | 147 | 143 | 132 | 113 | 140 | 148 | 112 | 138 | 146 | 136 | 136 | 115 | 144 | 145 | 144 | 127 | 145 | 139 | 144 | 142 | 144 | 146 | 135 | 141 | 140 | 134 | 149 | 144 | 125 | 142 | 136 | 144 | 139 | 134 | 142 | 140 |     |     |
| 112 | 105 | 137 | 115 | 103 | 103 | 100 | 105 | 106 | 110 | 107 | 101 | 90  | 104 | 103 | 99  | 108 | 90  | 118 | 130 | 89  | 103 | 128 | 94  | 92  | 105 | 116 | 117 | 99  | 97  | 99  | 143 | 100 | 91  | 88  | 100 | 89  | 110 | 96  | 111 | 102 | 119 | 92  | 103 | 112 | 91  | 87  | 103 | 93  | 106 | 106 | 101 |     |     |
| 93  | 88  | 140 | 89  | 87  | 98  | 84  | 99  | 113 | 95  | 81  | 101 | 89  | 93  | 107 | 88  | 84  | 89  | 124 | 114 | 112 | 89  | 129 | 87  | 80  | 79  | 102 | 119 | 70  | 80  | 104 | 140 | 87  | 97  | 89  | 105 | 97  | 101 | 83  | 99  | 80  | 113 | 92  | 87  | 109 | 84  | 85  | 86  | 94  | 94  | 97  | 73  |     |     |
| 102 | 75  | 145 | 120 | 104 | 117 | 97  | 105 | 113 | 73  | 102 | 95  | 101 | 104 | 90  | 113 | 117 | 101 | 125 | 130 | 104 | 81  | 136 | 92  | 107 | 88  | 69  | 133 | 96  | 120 | 90  | 145 | 109 | 112 | 115 | 109 | 110 | 88  | 89  | 115 | 107 | 135 | 111 | 101 | 126 | 108 | 114 | 85  | 94  | 88  | 121 | 122 |     |     |
| 104 | 99  | 139 | 93  | 114 | 103 | 93  | 90  | 115 | 114 | 94  | 93  | 60  | 106 | 87  | 96  | 96  | 60  | 116 | 134 | 90  | 96  | 127 | 84  | 101 | 88  | 105 | 130 | 68  | 92  | 107 | 145 | 97  | 98  | 108 | 101 | 91  | 104 | 90  | 116 | 102 | 127 | 101 | 112 | 121 | 100 | 74  | 94  | 88  | 89  | 107 | 103 |     |     |
| 98  | 94  | 130 | 125 | 89  | 98  | 102 | 112 | 97  | 104 | 117 | 79  | 96  | 100 | 65  | 97  | 110 | 96  | 116 | 117 | 81  | 107 | 129 | 89  | 97  | 104 | 105 | 118 | 101 | 107 | 63  | 137 | 93  | 88  | 101 | 83  | 104 | 98  | 99  | 106 | 92  | 116 | 84  | 91  | 113 | 100 | 106 | 100 | 95  | 98  | 106 |     |     |     |
| 89  | 90  | 141 | 95  | 113 | 115 | 84  | 90  | 119 | 75  | 92  | 87  | 106 | 108 | 90  | 110 | 102 | 106 | 124 | 127 | 112 | 94  | 132 | 90  | 100 | 92  | 83  | 128 | 89  | 110 | 85  | 148 | 106 | 108 | 108 | 99  | 117 | 93  | 98  | 101 | 90  | 126 | 99  | 107 | 115 | 106 | 106 | 91  | 91  | 97  | 116 | 94  |     |     |
| 95  | 83  | 144 | 110 | 105 | 102 | 83  | 90  | 107 | 78  | 100 | 102 | 106 | 99  | 88  | 100 | 110 | 106 | 133 | 131 | 112 | 88  | 89  | 129 | 80  | 99  | 82  | 71  | 128 | 88  | 112 | 91  | 141 | 89  | 114 | 108 | 98  | 116 | 93  | 82  | 109 | 94  | 132 |     |     |     |     |     |     |     |     |     |     |     |

|     |     |     |     |     |     |     |     |     |     |     |     |     |     |     |     |     |     |     |     |     |     |     |     |     |     |     |     |     |     |     |     |     |     |     |     |     |     |     |     |     |     |     |     |     |     |     |     |     |     |     |     |
|-----|-----|-----|-----|-----|-----|-----|-----|-----|-----|-----|-----|-----|-----|-----|-----|-----|-----|-----|-----|-----|-----|-----|-----|-----|-----|-----|-----|-----|-----|-----|-----|-----|-----|-----|-----|-----|-----|-----|-----|-----|-----|-----|-----|-----|-----|-----|-----|-----|-----|-----|-----|
| 100 | 99  | 136 | 107 | 106 | 93  | 91  | 99  | 101 | 107 | 101 | 97  | 107 | 95  | 80  | 97  | 113 | 107 | 132 | 124 | 99  | 104 | 128 | 90  | 101 | 98  | 96  | 116 | 99  | 115 | 70  | 147 | 103 | 104 | 113 | 0   | 111 | 97  | 102 | 105 | 102 | 122 | 65  | 105 | 118 | 99  | 106 | 98  | 96  | 110 | 117 | 107 |
| 124 | 113 | 136 | 104 | 82  | 94  | 105 | 102 | 115 | 109 | 111 | 86  | 82  | 90  | 98  | 90  | 99  | 82  | 114 | 122 | 85  | 96  | 115 | 93  | 87  | 92  | 123 | 116 | 93  | 80  | 86  | 147 | 87  | 82  | 76  | 111 | 0   | 119 | 94  | 98  | 103 | 117 | 80  | 71  | 126 | 90  | 63  | 108 | 94  | 91  | 106 | 91  |
| 62  | 90  | 146 | 103 | 116 | 115 | 89  | 98  | 124 | 93  | 85  | 108 | 100 | 107 | 100 | 111 | 107 | 100 | 124 | 137 | 114 | 68  | 141 | 104 | 112 | 94  | 78  | 134 | 83  | 108 | 107 | 148 | 96  | 109 | 108 | 97  | 119 | 0   | 88  | 110 | 111 | 134 | 111 | 99  | 125 | 96  | 108 | 71  | 97  | 92  | 112 | 101 |
| 107 | 83  | 137 | 103 | 102 | 103 | 92  | 99  | 112 | 91  | 90  | 87  | 82  | 86  | 94  | 99  | 106 | 82  | 137 | 130 | 109 | 71  | 130 | 75  | 81  | 53  | 91  | 130 | 70  | 97  | 90  | 144 | 88  | 97  | 90  | 102 | 94  | 88  | 0   | 108 | 92  | 127 | 98  | 85  | 123 | 82  | 83  | 77  | 76  | 105 | 108 | 90  |
| 107 | 115 | 132 | 90  | 86  | 103 | 96  | 90  | 120 | 106 | 82  | 90  | 104 | 108 | 93  | 96  | 94  | 104 | 127 | 134 | 110 | 98  | 139 | 114 | 99  | 102 | 111 | 128 | 111 | 80  | 97  | 149 | 100 | 103 | 107 | 105 | 98  | 110 | 108 | 0   | 84  | 126 | 96  | 79  | 128 | 110 | 98  | 99  | 109 | 117 | 128 | 76  |
| 111 | 97  | 148 | 102 | 95  | 99  | 84  | 103 | 117 | 94  | 86  | 87  | 93  | 106 | 77  | 96  | 98  | 93  | 134 | 128 | 101 | 105 | 124 | 103 | 83  | 92  | 108 | 128 | 87  | 80  | 86  | 148 | 86  | 90  | 85  | 102 | 103 | 111 | 92  | 84  | 0   | 134 | 99  | 100 | 114 | 90  | 101 | 95  | 94  | 109 | 101 | 70  |
| 130 | 127 | 128 | 124 | 115 | 128 | 127 | 131 | 113 | 131 | 136 | 124 | 113 | 119 | 129 | 119 | 121 | 113 | 126 | 112 | 125 | 129 | 113 | 121 | 128 | 125 | 130 | 111 | 126 | 121 | 119 | 142 | 133 | 122 | 130 | 122 | 117 | 134 | 127 | 126 | 134 | 0   | 113 | 128 | 120 | 125 | 132 | 114 | 125 | 105 | 124 |     |
| 108 | 94  | 134 | 100 | 75  | 81  | 102 | 100 | 106 | 107 | 113 | 81  | 94  | 81  | 87  | 73  | 84  | 94  | 118 | 129 | 91  | 96  | 117 | 84  | 84  | 90  | 111 | 115 | 98  | 87  | 73  | 148 | 76  | 92  | 88  | 65  | 80  | 111 | 98  | 96  | 99  | 113 | 0   | 79  | 113 | 92  | 82  | 99  | 79  | 101 | 104 | 96  |
| 110 | 102 | 130 | 104 | 72  | 93  | 97  | 102 | 119 | 99  | 88  | 89  | 82  | 87  | 98  | 94  | 86  | 82  | 114 | 124 | 83  | 83  | 127 | 90  | 94  | 85  | 115 | 117 | 84  | 82  | 90  | 144 | 81  | 84  | 92  | 105 | 71  | 99  | 85  | 79  | 100 | 128 | 79  | 0   | 118 | 102 | 79  | 101 | 95  | 93  | 115 | 84  |
| 106 | 107 | 119 | 127 | 113 | 116 | 118 | 114 | 116 | 120 | 126 | 120 | 121 | 137 | 117 | 117 | 116 | 121 | 112 | 110 | 101 | 128 | 120 | 114 | 106 | 116 | 119 | 111 | 114 | 118 | 133 | 108 | 114 | 105 | 118 | 126 | 125 | 123 | 128 | 114 | 120 | 113 | 118 | 0   | 115 | 120 | 119 | 115 | 116 | 105 | 125 |     |
| 93  | 96  | 142 | 100 | 93  | 98  | 84  | 100 | 105 | 101 | 101 | 94  | 107 | 71  | 109 | 76  | 105 | 107 | 130 | 130 | 102 | 89  | 119 | 93  | 69  | 85  | 102 | 116 | 86  | 92  | 107 | 148 | 76  | 79  | 73  | 99  | 90  | 96  | 82  | 110 | 90  | 125 | 92  | 102 | 115 | 0   | 87  | 88  | 97  | 95  | 90  | 82  |
| 108 | 110 | 132 | 106 | 99  | 115 | 96  | 94  | 126 | 108 | 100 | 95  | 72  | 97  | 100 | 109 | 87  | 72  | 120 | 130 | 100 | 95  | 125 | 88  | 87  | 84  | 120 | 118 | 78  | 75  | 104 | 144 | 90  | 93  | 87  | 106 | 63  | 108 | 83  | 98  | 101 | 125 | 82  | 79  | 120 | 87  | 0   | 100 | 93  | 97  | 109 | 91  |
| 86  | 91  | 145 | 95  | 98  | 98  | 84  | 95  | 109 | 90  | 83  | 90  | 84  | 92  | 88  | 95  | 94  | 84  | 125 | 134 | 104 | 56  | 136 | 88  | 92  | 63  | 71  | 132 | 71  | 97  | 104 | 147 | 80  | 103 | 97  | 98  | 108 | 71  | 77  | 99  | 95  | 132 | 99  | 101 | 119 | 88  | 100 | 0   | 68  | 59  | 108 | 83  |
| 106 | 93  | 138 | 95  | 89  | 95  | 98  | 96  | 97  | 100 | 104 | 76  | 75  | 93  | 92  | 87  | 98  | 75  | 126 | 129 | 96  | 65  | 126 | 74  | 100 | 74  | 92  | 120 | 86  | 93  | 86  | 140 | 90  | 98  | 94  | 96  | 94  | 114 | 79  | 95  | 115 | 97  | 93  | 68  | 0   | 63  | 99  | 85  | 85  |     |     |     |
| 109 | 91  | 138 | 101 | 104 | 104 | 101 | 97  | 113 | 101 | 95  | 87  | 80  | 93  | 97  | 95  | 106 | 80  | 128 | 127 | 97  | 65  | 138 | 80  | 95  | 84  | 90  | 136 | 77  | 103 | 102 | 136 | 90  | 99  | 97  | 110 | 91  | 92  | 75  | 117 | 109 | 125 | 101 | 93  | 116 | 95  | 97  | 59  | 63  | 0   | 106 | 93  |
| 112 | 109 | 137 | 118 | 96  | 113 | 112 | 114 | 108 | 121 | 120 | 113 | 99  | 105 | 111 | 100 | 104 | 99  | 118 | 127 | 110 | 113 | 117 | 109 | 95  | 101 | 112 | 120 | 101 | 98  | 115 | 146 | 90  | 96  | 89  | 117 | 106 | 112 | 108 | 128 | 101 | 105 | 104 | 115 | 105 | 90  | 109 | 108 | 99  | 106 | 0   | 104 |
| 106 | 110 | 146 | 78  | 97  | 84  | 77  | 92  | 118 | 109 | 64  | 97  | 88  | 94  | 108 | 86  | 80  | 88  | 125 | 132 | 120 | 82  | 132 | 101 | 95  | 96  | 102 | 127 | 81  | 40  | 111 | 148 | 81  | 95  | 96  | 107 | 91  | 101 | 90  | 76  | 70  | 124 | 96  | 84  | 125 | 82  | 91  | 83  | 85  | 93  | 104 | 0   |
| 92  | 73  | 144 | 107 | 82  | 102 | 84  | 97  | 117 | 103 | 92  | 87  | 103 | 97  | 76  | 107 | 112 | 103 | 121 | 138 | 105 | 86  | 129 | 87  | 77  | 88  | 125 | 89  | 107 | 72  | 142 | 86  | 82  | 82  | 94  | 93  | 92  | 86  | 105 | 82  | 142 | 92  | 77  | 110 | 88  | 92  | 94  | 83  | 88  | 109 | 105 |     |
| 150 | 141 | 115 | 144 | 150 | 146 | 142 | 143 | 126 | 139 | 142 | 140 | 144 | 133 | 141 | 141 | 146 | 144 | 138 | 108 | 143 | 148 | 112 | 136 | 147 | 141 | 131 | 113 | 143 | 149 | 138 | 135 | 150 | 140 | 146 | 136 | 142 | 143 | 140 | 141 | 147 | 126 | 143 | 144 | 131 | 139 | 134 | 141 | 137 | 131 | 142 | 140 |
| 102 | 94  | 138 | 108 | 98  | 94  | 107 | 113 | 112 | 98  | 113 | 96  | 91  | 92  | 103 | 84  | 111 | 91  | 128 | 128 | 85  | 98  | 125 | 104 | 90  | 94  | 109 | 123 | 94  | 107 | 96  | 142 | 76  | 85  | 85  | 94  | 107 | 98  | 87  | 122 | 98  | 120 | 82  | 106 | 112 | 89  | 107 | 91  | 84  | 85  | 89  | 103 |
| 110 | 93  | 134 | 109 | 72  | 91  | 87  | 102 | 114 | 94  | 87  | 61  | 92  | 95  | 69  | 86  | 106 | 92  | 129 | 134 | 96  | 85  | 133 | 86  | 85  | 92  | 109 | 134 | 90  | 95  | 72  | 144 | 81  | 89  | 97  | 100 | 84  | 104 | 79  | 78  | 77  | 136 | 88  | 64  | 109 | 106 | 98  | 88  | 83  | 87  | 117 | 93  |
| 105 | 85  | 138 | 114 | 100 | 104 | 103 | 100 | 112 | 97  | 107 | 94  | 99  | 91  | 97  | 103 | 108 | 99  | 117 | 133 | 98  | 77  | 131 | 85  | 86  | 83  | 92  | 132 | 100 | 115 | 82  | 143 | 98  | 88  | 74  | 105 | 101 | 86  | 91  | 107 | 93  | 131 | 102 | 103 | 121 | 95  | 110 | 89  | 83  | 82  | 102 | 110 |
| 92  | 82  | 140 | 103 | 108 | 102 | 93  | 95  | 117 | 81  | 85  | 97  | 101 | 107 | 87  | 104 | 103 | 101 | 133 | 135 | 106 | 90  | 140 | 84  | 102 | 90  | 90  | 135 | 86  | 109 | 97  | 138 | 89  | 111 | 116 | 107 | 113 | 86  | 82  | 114 | 96  | 136 | 103 | 99  | 119 | 106 | 107 | 80  | 91  | 78  | 120 | 107 |
| 95  | 82  | 143 | 106 | 96  | 87  | 99  | 110 | 99  | 107 | 93  | 84  | 92  | 92  | 104 | 99  | 84  | 134 | 130 | 100 | 83  | 126 | 96  | 97  | 54  | 93  | 125 | 81  | 96  | 93  | 147 | 66  | 100 | 96  | 94  | 96  | 92  | 64  | 109 | 87  | 127 | 88  | 97  | 120 | 95  | 94  | 73  | 83  | 87  | 104 | 101 |     |
| 98  | 110 | 131 | 97  | 99  | 98  | 103 | 104 | 117 | 112 | 88  | 92  | 84  | 103 | 80  | 102 | 95  | 84  | 121 | 127 | 99  | 85  | 133 | 74  | 96  | 67  | 97  | 122 | 72  | 100 | 80  | 145 | 94  | 89  | 98  | 80  | 94  | 94  | 89  | 94  | 98  | 121 | 92  | 87  | 133 | 102 | 94  | 84  | 91  | 99  | 108 | 89  |
| 101 | 116 | 143 | 113 | 85  | 94  | 94  | 108 | 128 | 108 | 92  | 102 | 92  | 104 | 95  | 92  | 103 | 92  | 124 | 140 | 100 | 101 | 137 | 101 | 86  | 100 | 117 | 128 | 84  | 86  | 97  | 152 | 81  | 81  | 83  | 110 | 86  | 106 | 101 | 96  | 91  | 137 | 95  | 84  | 109 | 90  | 96  | 101 | 109 | 100 | 113 | 97  |
| 107 | 90  | 128 | 121 | 98  | 97  | 107 | 105 | 109 | 94  | 117 | 91  | 95  | 84  | 93  | 92  | 106 | 95  | 107 | 125 | 93  | 93  | 124 | 89  | 91  | 88  | 108 | 119 | 103 | 104 | 77  | 149 | 96  | 96  | 79  | 94  | 90  | 100 | 91  | 108 | 106 | 118 | 77  | 94  | 124 | 101 | 97  | 94  | 93  | 102 | 105 | 111 |
| 78  | 88  | 139 | 101 | 103 | 105 | 91  | 100 | 122 | 88  | 95  | 101 | 96  | 96  | 87  | 110 | 105 | 96  | 123 | 136 | 107 | 77  | 131 | 85  | 88  | 81  | 91  | 132 | 76  | 104 | 92  | 141 | 82  | 97  | 107 | 100 | 102 | 80  | 70  | 100 | 106 | 129 | 101 | 85  | 109 | 85  | 92  | 83  | 96  | 84  | 112 | 101 |
| 101 | 105 | 130 | 103 | 73  | 104 | 101 | 101 | 111 | 114 | 82  | 98  | 84  | 96  | 90  | 98  | 98  | 128 | 124 | 76  | 107 | 123 | 99  | 78  | 90  | 120 | 108 | 100 | 90  | 97  | 148 | 68  | 73  | 79  | 88  | 78  | 113 | 96  | 98  | 104 | 116 | 68  | 80  | 109 | 82  | 71  | 94  | 84  | 98  | 103 | 97  |     |
| 107 | 84  | 134 | 105 | 94  | 110 | 103 | 99  | 115 | 90  | 93  | 77  | 68  | 102 | 83  | 108 | 92  | 68  | 127 | 121 | 91  | 91  | 133 | 70  | 83  | 67  | 104 | 124 | 82  | 96  | 66  | 138 | 102 | 78  | 97  | 98  | 86  | 103 | 80  | 90  | 85  | 125 | 99  | 77  | 119 | 110 | 94  | 121 | 95  | 88  | 120 | 94  |
| 90  | 99  | 141 | 106 | 96  | 115 | 103 | 111 | 120 | 94  | 103 | 97  | 98  | 104 | 93  | 115 | 91  | 98  | 114 | 132 | 107 | 65  | 137 | 73  | 83  | 78  | 104 | 132 | 85  | 99  | 72  | 148 | 90  | 82  | 83  | 94  | 97  | 91  | 95  | 96  | 99  | 127 | 91  | 99  | 121 | 101 | 100 | 72  | 95  | 86  | 107 | 91  |
| 96  | 93  | 131 | 113 | 101 | 106 | 91  | 107 | 121 | 96  | 97  | 100 | 82  | 100 | 86  | 103 | 101 | 82  | 118 | 130 | 105 | 79  | 13  |     |     |     |     |     |     |     |     |     |     |     |     |     |     |     |     |     |     |     |     |     |     |     |     |     |     |     |     |     |

|     |     |     |     |     |     |     |     |     |     |     |     |     |     |     |     |     |     |     |     |     |     |     |     |     |     |     |     |     |     |     |     |     |     |     |     |     |     |     |     |     |     |     |     |     |     |     |     |     |     |     |     |
|-----|-----|-----|-----|-----|-----|-----|-----|-----|-----|-----|-----|-----|-----|-----|-----|-----|-----|-----|-----|-----|-----|-----|-----|-----|-----|-----|-----|-----|-----|-----|-----|-----|-----|-----|-----|-----|-----|-----|-----|-----|-----|-----|-----|-----|-----|-----|-----|-----|-----|-----|-----|
| 74  | 101 | 137 | 95  | 99  | 112 | 77  | 105 | 123 | 91  | 83  | 112 | 100 | 106 | 105 | 107 | 101 | 100 | 116 | 136 | 112 | 101 | 131 | 86  | 96  | 87  | 100 | 122 | 97  | 90  | 100 | 150 | 88  | 103 | 97  | 105 | 105 | 76  | 99  | 94  | 88  | 126 | 99  | 94  | 113 | 96  | 90  | 83  | 108 | 105 | 112 | 92  |
| 94  | 91  | 137 | 88  | 101 | 85  | 68  | 87  | 117 | 99  | 71  | 106 | 64  | 95  | 98  | 90  | 62  | 64  | 134 | 131 | 122 | 97  | 136 | 99  | 99  | 88  | 99  | 122 | 76  | 77  | 109 | 143 | 92  | 108 | 105 | 100 | 108 | 91  | 86  | 93  | 86  | 125 | 104 | 82  | 123 | 96  | 100 | 87  | 102 | 105 | 109 | 77  |
| 137 | 127 | 101 | 137 | 125 | 127 | 138 | 130 | 110 | 135 | 141 | 131 | 128 | 113 | 136 | 129 | 127 | 128 | 117 | 109 | 126 | 140 | 113 | 118 | 126 | 125 | 136 | 101 | 131 | 123 | 131 | 118 | 134 | 126 | 126 | 130 | 129 | 142 | 131 | 136 | 139 | 122 | 124 | 122 | 120 | 123 | 133 | 141 | 126 | 133 | 122 | 134 |
| 133 | 126 | 104 | 133 | 125 | 124 | 138 | 135 | 101 | 135 | 142 | 125 | 132 | 127 | 132 | 127 | 128 | 132 | 116 | 92  | 115 | 148 | 122 | 124 | 126 | 129 | 140 | 88  | 136 | 132 | 129 | 124 | 134 | 125 | 126 | 125 | 127 | 142 | 136 | 132 | 135 | 115 | 122 | 130 | 106 | 128 | 133 | 141 | 130 | 133 | 126 | 134 |
| 90  | 84  | 135 | 98  | 85  | 99  | 80  | 99  | 113 | 84  | 89  | 75  | 95  | 103 | 81  | 96  | 105 | 95  | 119 | 131 | 86  | 91  | 119 | 88  | 76  | 84  | 107 | 119 | 86  | 93  | 82  | 146 | 85  | 83  | 90  | 105 | 93  | 99  | 94  | 93  | 80  | 126 | 90  | 87  | 104 | 90  | 93  | 86  | 98  | 87  | 107 | 96  |
| 113 | 101 | 141 | 114 | 91  | 98  | 104 | 107 | 118 | 109 | 117 | 95  | 95  | 95  | 105 | 92  | 106 | 95  | 119 | 136 | 90  | 90  | 121 | 103 | 77  | 93  | 121 | 128 | 93  | 90  | 97  | 150 | 81  | 80  | 79  | 114 | 55  | 100 | 93  | 99  | 100 | 130 | 89  | 91  | 119 | 82  | 82  | 106 | 101 | 85  | 107 | 101 |
| 104 | 105 | 133 | 99  | 103 | 107 | 107 | 97  | 125 | 108 | 116 | 114 | 104 | 97  | 117 | 103 | 108 | 104 | 139 | 141 | 113 | 94  | 126 | 111 | 91  | 93  | 109 | 127 | 100 | 99  | 113 | 138 | 88  | 104 | 98  | 115 | 101 | 108 | 98  | 100 | 107 | 129 | 102 | 110 | 121 | 86  | 103 | 95  | 97  | 106 | 103 | 101 |
| 104 | 98  | 135 | 104 | 90  | 99  | 104 | 107 | 108 | 107 | 112 | 82  | 89  | 90  | 100 | 89  | 103 | 89  | 126 | 129 | 90  | 96  | 115 | 99  | 100 | 85  | 117 | 121 | 92  | 93  | 99  | 144 | 92  | 106 | 103 | 108 | 91  | 110 | 99  | 101 | 102 | 120 | 85  | 87  | 128 | 90  | 94  | 93  | 91  | 99  | 109 | 96  |
| 109 | 109 | 141 | 92  | 82  | 96  | 87  | 82  | 116 | 105 | 93  | 94  | 97  | 97  | 97  | 97  | 87  | 97  | 136 | 136 | 112 | 98  | 128 | 102 | 72  | 85  | 118 | 123 | 77  | 67  | 115 | 147 | 76  | 88  | 86  | 101 | 97  | 112 | 86  | 90  | 72  | 121 | 91  | 94  | 115 | 80  | 86  | 95  | 91  | 97  | 97  | 67  |
| 122 | 119 | 121 | 132 | 112 | 117 | 125 | 131 | 96  | 127 | 132 | 111 | 127 | 115 | 116 | 112 | 128 | 127 | 102 | 104 | 105 | 122 | 106 | 121 | 114 | 119 | 124 | 96  | 130 | 126 | 116 | 139 | 120 | 103 | 108 | 125 | 117 | 122 | 128 | 118 | 114 | 104 | 120 | 114 | 104 | 100 | 136 | 124 | 115 | 124 | 101 | 120 |
| 95  | 87  | 138 | 95  | 67  | 96  | 94  | 101 | 124 | 81  | 102 | 82  | 90  | 86  | 92  | 97  | 96  | 90  | 130 | 142 | 93  | 84  | 123 | 88  | 55  | 76  | 114 | 123 | 80  | 86  | 89  | 147 | 59  | 61  | 76  | 94  | 82  | 102 | 81  | 93  | 81  | 123 | 78  | 82  | 113 | 73  | 85  | 87  | 86  | 92  | 98  | 87  |
| 101 | 103 | 133 | 94  | 97  | 92  | 78  | 102 | 120 | 100 | 81  | 85  | 93  | 103 | 79  | 94  | 89  | 93  | 117 | 127 | 102 | 102 | 132 | 102 | 100 | 104 | 119 | 121 | 82  | 84  | 89  | 152 | 95  | 93  | 96  | 101 | 79  | 100 | 101 | 80  | 85  | 130 | 86  | 70  | 119 | 110 | 83  | 103 | 100 | 104 | 124 | 86  |
| 84  | 101 | 140 | 89  | 93  | 113 | 95  | 92  | 126 | 96  | 90  | 104 | 88  | 96  | 94  | 107 | 84  | 88  | 129 | 140 | 111 | 74  | 142 | 95  | 77  | 90  | 101 | 143 | 75  | 88  | 104 | 145 | 80  | 85  | 103 | 108 | 93  | 86  | 78  | 91  | 106 | 128 | 95  | 90  | 119 | 99  | 83  | 76  | 93  | 84  | 114 | 87  |





|     |     |     |     |     |     |     |     |     |     |     |     |     |     |     |     |     |     |     |     |     |     |     |     |     |     |     |     |     |     |     |     |     |     |     |     |     |     |     |     |     |     |     |     |     |     |     |     |     |     |     |     |
|-----|-----|-----|-----|-----|-----|-----|-----|-----|-----|-----|-----|-----|-----|-----|-----|-----|-----|-----|-----|-----|-----|-----|-----|-----|-----|-----|-----|-----|-----|-----|-----|-----|-----|-----|-----|-----|-----|-----|-----|-----|-----|-----|-----|-----|-----|-----|-----|-----|-----|-----|-----|
| 73  | 142 | 82  | 82  | 80  | 111 | 95  | 84  | 103 | 78  | 110 | 92  | 91  | 97  | 114 | 86  | 94  | 98  | 92  | 105 | 106 | 113 | 97  | 115 | 106 | 110 | 98  | 114 | 94  | 103 | 93  | 116 | 83  | 76  | 66  | 101 | 111 | 112 | 112 | 88  | 125 | 97  | 88  | 100 | 104 | 109 | 130 | 104 | 92  | 66  | 119 | 101 |
| 123 | 137 | 132 | 123 | 121 | 126 | 126 | 122 | 125 | 122 | 110 | 128 | 120 | 127 | 117 | 126 | 117 | 113 | 109 | 116 | 115 | 121 | 129 | 115 | 123 | 123 | 126 | 124 | 123 | 116 | 117 | 106 | 118 | 128 | 118 | 124 | 126 | 124 | 120 | 119 | 121 | 117 | 118 | 110 | 113 | 124 | 120 | 108 | 121 | 114 | 121 | 124 |
| 113 | 145 | 121 | 119 | 119 | 112 | 116 | 120 | 117 | 117 | 114 | 133 | 116 | 121 | 113 | 129 | 110 | 131 | 127 | 132 | 125 | 122 | 118 | 118 | 126 | 124 | 119 | 127 | 119 | 124 | 127 | 140 | 128 | 129 | 128 | 120 | 119 | 120 | 125 | 122 | 117 | 128 | 135 | 135 | 129 | 119 | 144 | 138 | 127 | 128 | 120 | 118 |
| 115 | 145 | 122 | 119 | 117 | 111 | 121 | 121 | 120 | 115 | 135 | 120 | 115 | 116 | 126 | 110 | 132 | 130 | 129 | 129 | 128 | 115 | 118 | 126 | 125 | 116 | 128 | 122 | 121 | 128 | 138 | 129 | 125 | 131 | 122 | 126 | 128 | 126 | 121 | 120 | 127 | 131 | 139 | 132 | 114 | 142 | 138 | 127 | 130 | 123 | 117 |     |
| 104 | 142 | 112 | 117 | 123 | 120 | 118 | 122 | 104 | 118 | 113 | 107 | 122 | 116 | 124 | 112 | 117 | 105 | 112 | 103 | 121 | 126 | 106 | 124 | 113 | 124 | 116 | 107 | 109 | 114 | 111 | 111 | 106 | 106 | 111 | 120 | 119 | 118 | 118 | 108 | 105 | 91  | 99  | 96  | 87  | 114 | 124 | 108 | 120 | 94  | 114 | 109 |
| 101 | 146 | 106 | 101 | 108 | 96  | 108 | 103 | 101 | 113 | 94  | 110 | 112 | 91  | 101 | 104 | 94  | 115 | 113 | 114 | 117 | 111 | 92  | 99  | 111 | 101 | 105 | 113 | 104 | 104 | 119 | 130 | 118 | 102 | 111 | 92  | 123 | 122 | 127 | 114 | 95  | 110 | 125 | 127 | 123 | 106 | 143 | 126 | 107 | 106 | 100 | 101 |
| 128 | 133 | 124 | 133 | 126 | 136 | 124 | 119 | 136 | 114 | 127 | 112 | 122 | 124 | 127 | 125 | 126 | 120 | 117 | 114 | 114 | 116 | 130 | 134 | 114 | 121 | 120 | 122 | 131 | 131 | 119 | 120 | 99  | 123 | 120 | 117 | 117 | 113 | 105 | 131 | 111 | 119 | 122 | 115 | 117 | 127 | 117 | 107 | 117 | 115 | 125 | 130 |
| 128 | 133 | 124 | 133 | 126 | 136 | 124 | 119 | 136 | 114 | 127 | 112 | 122 | 124 | 127 | 125 | 126 | 120 | 117 | 114 | 114 | 116 | 130 | 134 | 114 | 121 | 120 | 122 | 131 | 131 | 119 | 120 | 99  | 123 | 120 | 117 | 117 | 113 | 105 | 131 | 111 | 119 | 122 | 115 | 117 | 127 | 117 | 107 | 117 | 115 | 125 | 130 |
| 128 | 133 | 124 | 133 | 126 | 136 | 124 | 119 | 136 | 114 | 127 | 112 | 122 | 124 | 127 | 125 | 126 | 120 | 117 | 114 | 114 | 116 | 130 | 134 | 114 | 121 | 120 | 122 | 131 | 131 | 119 | 120 | 99  | 123 | 120 | 117 | 117 | 113 | 105 | 131 | 111 | 119 | 122 | 115 | 117 | 127 | 117 | 107 | 117 | 115 | 125 | 130 |
| 128 | 133 | 124 | 133 | 126 | 136 | 124 | 119 | 136 | 115 | 127 | 112 | 122 | 124 | 127 | 125 | 127 | 120 | 117 | 114 | 114 | 116 | 130 | 134 | 114 | 121 | 121 | 122 | 131 | 131 | 119 | 120 | 99  | 123 | 121 | 118 | 117 | 113 | 105 | 131 | 112 | 119 | 122 | 115 | 117 | 127 | 117 | 107 | 117 | 115 | 125 | 130 |
| 128 | 133 | 124 | 133 | 126 | 136 | 124 | 119 | 136 | 114 | 127 | 112 | 122 | 124 | 127 | 125 | 126 | 120 | 117 | 114 | 114 | 116 | 130 | 134 | 114 | 121 | 120 | 122 | 131 | 131 | 119 | 120 | 99  | 123 | 120 | 117 | 117 | 113 | 105 | 131 | 111 | 119 | 122 | 115 | 117 | 127 | 117 | 107 | 117 | 115 | 125 | 130 |
| 125 | 142 | 132 | 129 | 126 | 119 | 122 | 133 | 125 | 135 | 116 | 128 | 131 | 129 | 122 | 130 | 129 | 128 | 135 | 128 | 127 | 122 | 132 | 133 | 129 | 126 | 132 | 121 | 127 | 122 | 124 | 133 | 128 | 126 | 133 | 126 | 129 | 131 | 127 | 142 | 124 | 121 | 134 | 129 | 122 | 130 | 139 | 131 | 135 | 125 | 130 | 133 |
| 143 | 81  | 141 | 140 | 143 | 144 | 138 | 144 | 143 | 140 | 139 | 131 | 138 | 140 | 135 | 141 | 141 | 138 | 134 | 134 | 136 | 131 | 144 | 147 | 136 | 127 | 141 | 142 | 138 | 145 | 140 | 128 | 135 | 128 | 139 | 140 | 132 | 137 | 138 | 136 | 139 | 143 | 136 | 133 | 127 | 139 | 86  | 126 | 137 | 142 | 138 | 141 |
| 95  | 147 | 96  | 101 | 98  | 97  | 100 | 96  | 93  | 105 | 87  | 117 | 97  | 99  | 97  | 112 | 96  | 122 | 113 | 122 | 110 | 116 | 96  | 91  | 113 | 105 | 96  | 105 | 99  | 95  | 107 | 125 | 119 | 107 | 124 | 93  | 126 | 131 | 122 | 108 | 84  | 118 | 119 | 120 | 123 | 98  | 145 | 129 | 101 | 107 | 100 | 100 |
| 105 | 147 | 105 | 117 | 120 | 114 | 112 | 113 | 119 | 117 | 110 | 130 | 116 | 111 | 115 | 121 | 116 | 128 | 121 | 131 | 109 | 116 | 121 | 126 | 115 | 119 | 119 | 126 | 125 | 137 | 129 | 119 | 117 | 110 | 126 | 135 | 130 | 125 | 105 | 122 | 134 | 128 | 127 | 120 | 143 | 142 | 125 | 114 | 111 | 104 |     |     |
| 111 | 140 | 118 | 103 | 119 | 113 | 103 | 101 | 97  | 104 | 110 | 87  | 103 | 108 | 112 | 94  | 118 | 97  | 92  | 74  | 91  | 86  | 106 | 102 | 88  | 95  | 99  | 75  | 107 | 103 | 84  | 96  | 75  | 92  | 91  | 99  | 109 | 88  | 85  | 101 | 93  | 74  | 111 | 102 | 102 | 100 | 125 | 67  | 97  | 87  | 100 | 113 |
| 112 | 141 | 119 | 103 | 120 | 113 | 105 | 101 | 97  | 105 | 110 | 88  | 103 | 108 | 112 | 95  | 118 | 99  | 93  | 76  | 93  | 88  | 106 | 103 | 90  | 96  | 99  | 77  | 108 | 105 | 85  | 98  | 77  | 93  | 92  | 101 | 109 | 90  | 87  | 101 | 94  | 76  | 112 | 103 | 103 | 100 | 126 | 68  | 98  | 89  | 101 | 113 |
| 111 | 140 | 118 | 103 | 119 | 113 | 103 | 101 | 97  | 104 | 110 | 87  | 103 | 108 | 112 | 94  | 118 | 97  | 92  | 74  | 91  | 86  | 106 | 102 | 88  | 95  | 99  | 75  | 107 | 103 | 84  | 96  | 75  | 92  | 91  | 99  | 109 | 88  | 85  | 101 | 93  | 74  | 111 | 102 | 102 | 100 | 125 | 67  | 97  | 87  | 100 | 113 |
| 111 | 140 | 118 | 103 | 119 | 113 | 103 | 101 | 97  | 104 | 110 | 87  | 103 | 108 | 112 | 94  | 118 | 97  | 92  | 74  | 91  | 86  | 106 | 102 | 88  | 95  | 99  | 75  | 107 | 103 | 84  | 96  | 75  | 92  | 91  | 99  | 109 | 88  | 85  | 101 | 93  | 74  | 111 | 102 | 102 | 100 | 125 | 67  | 97  | 87  | 100 | 113 |
| 111 | 140 | 118 | 103 | 119 | 113 | 103 | 101 | 97  | 104 | 110 | 87  | 103 | 108 | 112 | 94  | 118 | 97  | 92  | 74  | 91  | 86  | 106 | 102 | 88  | 95  | 99  | 75  | 107 | 103 | 84  | 96  | 75  | 92  | 91  | 99  | 109 | 88  | 85  | 101 | 93  | 74  | 111 | 102 | 102 | 100 | 125 | 67  | 97  | 87  | 100 | 113 |
| 111 | 140 | 118 | 103 | 119 | 113 | 103 | 101 | 97  | 104 | 110 | 87  | 103 | 108 | 112 | 94  | 118 | 97  | 92  | 74  | 91  | 86  | 106 | 102 | 88  | 95  | 99  | 75  | 107 | 103 | 84  | 96  | 75  | 92  | 91  | 99  | 109 | 88  | 85  | 101 | 93  | 74  | 111 | 102 | 102 | 100 | 125 | 67  | 97  | 87  | 100 | 113 |
| 111 | 140 | 118 | 103 | 119 | 113 | 103 | 101 | 97  | 104 | 110 | 87  | 103 | 108 | 112 | 94  | 118 | 97  | 92  | 74  | 91  | 86  | 106 | 102 | 88  | 95  | 99  | 75  | 107 | 103 | 84  | 96  | 75  | 92  | 91  | 99  | 109 | 88  | 85  | 101 | 93  | 74  | 111 | 102 | 102 | 100 | 125 | 67  | 97  | 87  | 100 | 113 |
| 111 | 140 | 118 | 103 | 119 | 113 | 103 | 101 | 97  | 104 | 110 | 87  | 103 | 108 | 112 | 94  | 118 | 97  | 92  | 74  | 91  | 86  | 106 | 102 | 88  | 95  | 99  | 75  | 107 | 103 | 84  | 96  | 75  | 92  | 91  | 99  | 109 | 88  | 85  | 101 | 93  | 74  | 111 | 102 | 102 | 100 | 125 | 67  | 97  | 87  | 100 | 113 |
| 111 | 140 | 118 | 103 | 119 | 113 | 103 | 101 | 97  | 104 | 110 | 87  | 103 | 108 | 112 | 94  | 118 | 97  | 92  | 74  | 91  | 86  | 106 | 102 | 88  | 95  | 99  | 75  | 107 | 103 | 84  | 96  | 75  | 92  | 91  | 99  | 109 | 88  | 85  | 101 | 93  | 74  | 111 | 102 | 102 | 100 | 125 | 67  | 97  | 87  | 100 | 113 |
| 111 | 140 | 118 | 103 | 119 | 113 | 103 | 101 | 97  | 104 | 110 | 87  | 103 | 108 | 112 | 94  | 118 | 97  | 92  | 74  | 91  | 86  | 106 | 102 | 88  | 95  | 99  | 75  | 107 | 103 | 84  | 96  | 75  | 92  | 91  | 99  | 109 | 88  | 85  | 101 | 93  | 74  | 111 | 102 | 102 | 100 | 125 | 67  | 97  | 87  | 100 | 113 |
| 111 | 140 | 118 | 103 | 119 | 113 | 103 | 101 | 97  | 104 | 110 | 87  | 103 | 108 | 112 | 94  | 118 | 97  | 92  | 74  | 91  | 86  | 106 | 102 | 88  | 95  | 99  | 75  | 107 | 103 | 84  | 96  | 75  | 92  | 91  | 99  | 109 | 88  | 85  | 101 | 93  | 74  | 111 | 102 | 102 | 100 | 125 | 67  | 97  | 87  | 100 | 113 |
| 111 | 140 | 118 | 103 | 119 | 113 | 103 | 101 | 97  | 104 | 110 | 87  | 103 | 108 | 112 | 94  | 118 | 97  | 92  | 74  | 91  | 86  | 106 | 102 | 88  | 95  | 99  | 75  | 107 | 103 | 84  | 96  | 75  | 92  | 91  | 99  | 109 | 88  | 85  | 101 | 93  | 74  | 111 | 102 | 102 | 100 | 125 | 67  | 97  | 87  | 100 | 113 |
| 111 | 140 | 118 | 103 | 119 | 113 | 103 | 101 | 97  | 104 | 110 | 87  | 103 | 108 | 112 | 94  | 118 | 97  | 92  | 74  | 91  | 86  | 106 | 102 | 88  | 95  | 99  | 75  | 107 | 103 | 84  | 96  | 75  | 92  | 91  | 99  | 109 | 88  | 85  | 101 | 93  | 74  | 111 | 102 | 102 | 100 | 125 | 67  | 97  | 87  | 100 | 113 |
| 111 | 140 | 118 | 103 | 119 | 113 | 103 | 101 | 97  | 104 | 110 | 87  | 103 | 108 | 112 | 94  | 118 | 97  | 92  | 74  | 91  | 86  | 106 | 102 | 88  | 95  | 99  | 75  | 107 | 103 | 84  | 96  | 75  | 92  | 91  | 99  | 109 | 88  | 85  | 101 | 93  | 74  | 111 | 102 | 102 | 100 | 125 | 67  | 97  | 87  | 100 | 113 |
| 111 | 140 | 118 | 103 | 119 | 113 | 103 | 101 | 97  | 104 | 110 | 87  | 103 | 108 | 112 | 94  | 118 | 97  | 92  | 74  | 91  | 86  | 106 | 102 | 88  | 95  | 99  | 75  | 107 | 103 | 84  | 96  | 75  | 92  | 91  | 99  | 109 | 88  | 85  | 101 | 93  | 74  | 111 | 102 | 102 | 100 | 125 | 67  | 97  | 87  | 100 | 113 |
| 111 | 140 | 118 | 103 | 119 | 113 | 103 | 101 | 97  | 104 | 110 | 87  | 103 | 108 | 112 | 94  | 118 | 97  | 92  | 74  | 91  | 86  | 106 | 10  |     |     |     |     |     |     |     |     |     |     |     |     |     |     |     |     |     |     |     |     |     |     |     |     |     |     |     |     |

|     |     |     |     |     |     |     |     |     |     |     |     |     |     |     |     |     |     |     |     |     |     |     |     |     |     |     |     |     |     |     |     |     |     |     |     |     |     |     |     |     |     |     |     |     |     |     |     |     |     |     |     |    |
|-----|-----|-----|-----|-----|-----|-----|-----|-----|-----|-----|-----|-----|-----|-----|-----|-----|-----|-----|-----|-----|-----|-----|-----|-----|-----|-----|-----|-----|-----|-----|-----|-----|-----|-----|-----|-----|-----|-----|-----|-----|-----|-----|-----|-----|-----|-----|-----|-----|-----|-----|-----|----|
| 131 | 145 | 140 | 137 | 133 | 135 | 130 | 141 | 134 | 132 | 128 | 139 | 136 | 134 | 136 | 134 | 133 | 135 | 139 | 140 | 132 | 134 | 135 | 140 | 137 | 137 | 143 | 137 | 140 | 136 | 138 | 141 | 139 | 133 | 139 | 130 | 137 | 142 | 139 | 145 | 133 | 132 | 141 | 133 | 130 | 144 | 143 | 136 | 140 | 133 | 135 | 138 |    |
| 95  | 135 | 87  | 98  | 94  | 98  | 84  | 95  | 97  | 95  | 92  | 72  | 102 | 93  | 97  | 88  | 107 | 88  | 81  | 98  | 92  | 106 | 92  | 105 | 80  | 86  | 102 | 85  | 81  | 84  | 74  | 92  | 75  | 93  | 94  | 91  | 110 | 107 | 101 | 107 | 99  | 88  | 107 | 102 | 114 | 127 | 90  | 86  | 93  | 85  | 81  |     |    |
| 83  | 138 | 93  | 89  | 104 | 108 | 92  | 96  | 86  | 104 | 96  | 81  | 93  | 93  | 88  | 77  | 103 | 104 | 95  | 92  | 60  | 95  | 91  | 89  | 88  | 73  | 100 | 93  | 88  | 80  | 74  | 107 | 97  | 88  | 98  | 92  | 122 | 115 | 120 | 101 | 97  | 93  | 105 | 116 | 116 | 111 | 117 | 96  | 81  | 93  | 87  | 93  |    |
| 101 | 137 | 107 | 90  | 101 | 119 | 101 | 98  | 103 | 90  | 105 | 77  | 91  | 98  | 105 | 93  | 112 | 92  | 88  | 82  | 91  | 104 | 106 | 106 | 99  | 94  | 89  | 85  | 95  | 103 | 84  | 110 | 82  | 81  | 82  | 101 | 95  | 106 | 106 | 101 | 120 | 97  | 103 | 118 | 111 | 118 | 128 | 88  | 81  | 68  | 110 | 102 |    |
| 117 | 136 | 118 | 100 | 112 | 104 | 102 | 110 | 116 | 110 | 111 | 121 | 116 | 108 | 116 | 103 | 100 | 99  | 112 | 113 | 110 | 120 | 96  | 101 | 109 | 118 | 115 | 112 | 110 | 115 | 101 | 117 | 103 | 108 | 114 | 101 | 108 | 101 | 107 | 92  | 102 | 84  | 103 | 110 | 125 | 108 | 94  | 105 | 104 | 99  |     |     |    |
| 86  | 135 | 89  | 83  | 76  | 73  | 89  | 87  | 110 | 84  | 93  | 102 | 64  | 81  | 83  | 86  | 75  | 107 | 106 | 97  | 86  | 96  | 81  | 111 | 92  | 63  | 71  | 109 | 83  | 98  | 85  | 133 | 101 | 109 | 99  | 89  | 118 | 114 | 126 | 104 | 99  | 103 | 101 | 110 | 118 | 103 | 130 | 110 | 63  | 103 | 91  | 81  |    |
| 120 | 139 | 117 | 91  | 122 | 104 | 97  | 91  | 115 | 111 | 111 | 111 | 95  | 109 | 96  | 100 | 125 | 101 | 93  | 82  | 101 | 71  | 101 | 105 | 91  | 87  | 96  | 96  | 100 | 115 | 101 | 100 | 86  | 105 | 97  | 99  | 105 | 102 | 104 | 104 | 86  | 97  | 119 | 103 | 115 | 103 | 123 | 88  | 89  | 103 | 85  | 98  |    |
| 90  | 149 | 103 | 87  | 106 | 86  | 90  | 82  | 75  | 105 | 87  | 102 | 95  | 92  | 81  | 77  | 109 | 109 | 97  | 89  | 94  | 95  | 74  | 88  | 75  | 95  | 91  | 84  | 92  | 78  | 90  | 95  | 80  | 91  | 91  | 103 | 109 | 112 | 105 | 79  | 100 | 110 | 122 | 112 | 96  | 143 | 105 | 94  | 86  | 87  |     |     |    |
| 149 | 124 | 143 | 146 | 145 | 150 | 148 | 144 | 148 | 140 | 141 | 139 | 145 | 146 | 140 | 147 | 146 | 141 | 150 | 144 | 141 | 145 | 148 | 152 | 139 | 143 | 147 | 149 | 147 | 150 | 145 | 138 | 136 | 141 | 141 | 148 | 139 | 142 | 139 | 137 | 147 | 147 | 137 | 141 | 144 | 123 | 140 | 146 | 142 | 151 | 151 |     |    |
| 117 | 140 | 117 | 116 | 111 | 108 | 110 | 115 | 112 | 113 | 111 | 112 | 114 | 117 | 125 | 122 | 109 | 115 | 119 | 113 | 115 | 122 | 109 | 141 | 112 | 115 | 104 | 119 | 114 | 108 | 115 | 101 | 109 | 105 | 117 | 91  | 91  | 81  | 115 | 109 | 112 | 113 | 129 | 113 | 112 | 136 | 93  | 112 | 105 | 108 | 99  |     |    |
| 90  | 145 | 102 | 90  | 80  | 63  | 77  | 96  | 101 | 76  | 104 | 78  | 94  | 77  | 106 | 84  | 111 | 101 | 98  | 91  | 89  | 87  | 89  | 86  | 77  | 95  | 93  | 98  | 86  | 94  | 123 | 99  | 95  | 106 | 87  | 126 | 105 | 115 | 96  | 84  | 95  | 111 | 112 | 106 | 100 | 133 | 107 | 100 | 109 | 74  | 95  |     |    |
| 144 | 46  | 138 | 149 | 141 | 149 | 138 | 144 | 150 | 143 | 143 | 138 | 140 | 145 | 141 | 144 | 139 | 137 | 140 | 145 | 140 | 143 | 149 | 150 | 137 | 133 | 150 | 144 | 140 | 148 | 147 | 130 | 142 | 137 | 140 | 143 | 129 | 142 | 139 | 140 | 143 | 145 | 131 | 133 | 124 | 143 | 88  | 138 | 140 | 145 | 144 | 145 |    |
| 136 | 64  | 139 | 141 | 139 | 139 | 138 | 153 | 143 | 142 | 139 | 135 | 144 | 141 | 142 | 141 | 141 | 137 | 137 | 142 | 141 | 144 | 147 | 145 | 134 | 131 | 146 | 143 | 136 | 144 | 144 | 131 | 141 | 135 | 139 | 141 | 134 | 140 | 138 | 139 | 140 | 146 | 130 | 137 | 128 | 146 | 97  | 131 | 140 | 146 | 138 | 141 |    |
| 85  | 144 | 110 | 74  | 100 | 98  | 95  | 102 | 95  | 108 | 98  | 89  | 87  | 95  | 91  | 89  | 94  | 100 | 101 | 97  | 62  | 99  | 102 | 98  | 80  | 95  | 112 | 92  | 85  | 82  | 86  | 120 | 87  | 95  | 101 | 93  | 124 | 109 | 117 | 91  | 91  | 98  | 104 | 116 | 111 | 109 | 135 | 99  | 107 | 104 | 87  | 101 |    |
| 75  | 138 | 109 | 88  | 82  | 52  | 78  | 98  | 109 | 96  | 73  | 114 | 83  | 89  | 87  | 106 | 69  | 115 | 102 | 106 | 108 | 96  | 82  | 106 | 87  | 86  | 95  | 106 | 94  | 97  | 101 | 132 | 106 | 109 | 107 | 85  | 120 | 122 | 125 | 108 | 95  | 107 | 107 | 117 | 107 | 101 | 136 | 114 | 97  | 112 | 78  | 82  |    |
| 86  | 139 | 111 | 82  | 89  | 97  | 102 | 88  | 96  | 87  | 90  | 98  | 92  | 90  | 92  | 95  | 81  | 103 | 77  | 98  | 89  | 101 | 84  | 96  | 82  | 88  | 89  | 92  | 98  | 87  | 92  | 102 | 89  | 106 | 84  | 78  | 110 | 111 | 96  | 111 | 72  | 102 | 96  | 113 | 114 | 108 | 128 | 95  | 85  | 95  | 97  | 96  |    |
| 93  | 140 | 97  | 98  | 100 | 93  | 103 | 102 | 97  | 100 | 97  | 111 | 103 | 95  | 105 | 97  | 99  | 114 | 88  | 99  | 92  | 110 | 89  | 97  | 89  | 95  | 93  | 99  | 100 | 81  | 118 | 100 | 110 | 82  | 93  | 119 | 117 | 111 | 102 | 74  | 107 | 107 | 120 | 108 | 98  | 133 | 104 | 94  | 104 | 96  | 79  |     |    |
| 74  | 147 | 92  | 71  | 89  | 110 | 104 | 98  | 83  | 89  | 97  | 80  | 96  | 106 | 70  | 90  | 88  | 92  | 91  | 70  | 99  | 89  | 99  | 89  | 101 | 110 | 81  | 79  | 75  | 84  | 100 | 90  | 80  | 89  | 84  | 118 | 99  | 94  | 97  | 99  | 92  | 93  | 115 | 117 | 114 | 139 | 98  | 102 | 79  | 102 | 106 |     |    |
| 91  | 147 | 106 | 79  | 102 | 50  | 77  | 104 | 94  | 105 | 79  | 104 | 94  | 100 | 78  | 100 | 91  | 109 | 109 | 107 | 101 | 90  | 80  | 99  | 87  | 86  | 106 | 91  | 85  | 93  | 92  | 116 | 110 | 100 | 110 | 90  | 116 | 118 | 114 | 101 | 94  | 108 | 112 | 111 | 110 | 93  | 140 | 121 | 104 | 104 | 81  | 86  |    |
| 98  | 134 | 105 | 110 | 105 | 107 | 105 | 111 | 108 | 105 | 105 | 108 | 106 | 109 | 106 | 113 | 111 | 111 | 111 | 110 | 110 | 114 | 112 | 106 | 126 | 99  | 117 | 107 | 101 | 109 | 116 | 102 | 106 | 103 | 106 | 104 | 98  | 102 | 111 | 97  | 118 | 103 | 114 | 108 | 121 | 112 | 108 | 129 | 93  | 101 | 93  | 112 | 96 |
| 114 | 133 | 127 | 104 | 116 | 109 | 115 | 108 | 118 | 109 | 103 | 117 | 109 | 122 | 107 | 124 | 105 | 112 | 110 | 107 | 121 | 117 | 115 | 125 | 115 | 110 | 119 | 110 | 120 | 118 | 117 | 123 | 104 | 114 | 119 | 116 | 90  | 99  | 105 | 115 | 113 | 110 | 109 | 113 | 110 | 125 | 112 | 111 | 103 | 115 | 114 |     |    |
| 92  | 152 | 95  | 75  | 96  | 76  | 93  | 96  | 69  | 105 | 79  | 89  | 95  | 93  | 89  | 69  | 106 | 104 | 93  | 92  | 79  | 96  | 74  | 71  | 85  | 85  | 97  | 75  | 70  | 81  | 69  | 106 | 106 | 82  | 100 | 78  | 117 | 109 | 111 | 105 | 84  | 105 | 99  | 117 | 112 | 100 | 142 | 114 | 85  | 101 | 82  | 91  |    |
| 83  | 147 | 76  | 92  | 108 | 91  | 92  | 92  | 88  | 109 | 80  | 100 | 93  | 91  | 85  | 98  | 91  | 100 | 101 | 93  | 100 | 120 | 87  | 98  | 97  | 100 | 96  | 99  | 89  | 97  | 86  | 119 | 116 | 85  | 93  | 95  | 119 | 120 | 124 | 102 | 86  | 97  | 94  | 116 | 110 | 105 | 134 | 118 | 105 | 81  | 89  | 77  |    |
| 144 | 48  | 138 | 150 | 138 | 147 | 134 | 149 | 148 | 143 | 143 | 141 | 141 | 148 | 138 | 145 | 142 | 139 | 141 | 149 | 137 | 138 | 147 | 151 | 133 | 135 | 152 | 146 | 141 | 143 | 148 | 132 | 147 | 139 | 145 | 143 | 134 | 147 | 144 | 138 | 145 | 149 | 135 | 136 | 130 | 142 | 92  | 140 | 141 | 145 | 142 | 144 |    |
| 93  | 144 | 92  | 90  | 102 | 106 | 110 | 103 | 95  | 103 | 96  | 105 | 102 | 107 | 89  | 95  | 99  | 106 | 98  | 105 | 112 | 97  | 109 | 112 | 106 | 103 | 85  | 90  | 104 | 95  | 114 | 96  | 94  | 103 | 116 | 102 | 108 | 100 | 85  | 100 | 114 | 103 | 98  | 134 | 108 | 98  | 109 | 90  | 109 | 99  |     |     |    |
| 69  | 137 | 90  | 94  | 103 | 98  | 93  | 103 | 97  | 105 | 95  | 91  | 89  | 90  | 97  | 102 | 112 | 97  | 101 | 71  | 89  | 85  | 98  | 80  | 85  | 107 | 92  | 86  | 74  | 92  | 110 | 99  | 100 | 98  | 83  | 126 | 110 | 117 | 106 | 87  | 101 | 111 | 115 | 115 | 106 | 119 | 97  | 85  | 99  | 85  | 93  |     |    |
| 83  | 137 | 115 | 97  | 84  | 70  | 86  | 113 | 108 | 99  | 86  | 124 | 92  | 95  | 91  | 102 | 82  | 121 | 117 | 114 | 116 | 108 | 93  | 114 | 103 | 107 | 96  | 117 | 98  | 99  | 115 | 131 | 111 | 118 | 111 | 102 | 128 | 121 | 130 | 106 | 107 | 108 | 105 | 119 | 112 | 108 | 137 | 117 | 92  | 118 | 90  | 93  |    |
| 107 | 144 | 97  | 99  | 109 | 96  | 103 | 92  | 94  | 108 | 97  | 96  | 97  | 102 | 88  | 89  | 109 | 103 | 100 | 89  | 100 | 104 | 94  | 102 | 96  | 93  | 106 | 90  | 84  | 104 | 86  | 103 | 96  | 98  | 90  | 92  | 115 | 105 | 115 | 103 | 88  | 104 | 100 | 109 | 119 | 95  | 135 | 108 | 94  | 93  | 102 | 92  |    |
| 77  | 134 | 82  | 82  | 86  | 93  | 94  | 90  | 101 | 88  | 85  | 94  | 86  | 93  | 95  | 91  | 75  | 106 | 104 | 97  | 100 | 111 | 95  | 104 | 98  | 94  | 124 | 101 | 90  | 85  | 98  | 112 | 116 | 113 | 109 | 113 | 91  | 89  | 113 | 109 | 113 | 91  | 89  | 113 | 109 | 115 | 124 | 107 | 92  | 82  | 107 | 97  |    |
| 93  | 130 | 105 | 93  | 95  | 84  | 99  | 100 | 114 | 96  | 86  | 109 | 89  | 86  | 101 | 105 | 84  | 109 | 105 | 100 | 98  | 93  | 100 | 97  | 85  | 86  | 98  | 97  | 98  | 92  | 102 | 128 | 100 | 122 | 103 | 80  | 126 | 117 | 118 | 120 | 91  | 111 | 115 | 127 | 122 | 110 | 134 | 113 | 96  | 112 | 92  | 96  |    |
| 80  | 136 | 105 | 85  | 89  | 58  | 77  | 106 | 109 | 101 | 80  | 106 | 97  | 101 | 82  | 97  | 83  | 109 | 99  | 107 | 104 | 92  | 92  | 107 | 81  | 81  | 97  | 99  | 87  | 92  | 97  | 120 | 108 | 108 | 106 | 84  | 123 | 116 | 121 | 106 | 98  | 101 | 106 | 115 | 112 | 108 | 136 | 114 | 92  | 112 | 79  | 83  |    |
| 98  | 138 | 84  | 96  | 85  | 113 | 95  |     |     |     |     |     |     |     |     |     |     |     |     |     |     |     |     |     |     |     |     |     |     |     |     |     |     |     |     |     |     |     |     |     |     |     |     |     |     |     |     |     |     |     |     |     |    |



|     |     |     |     |     |     |     |     |     |     |     |     |     |     |     |     |     |     |     |     |     |     |     |     |     |     |     |     |     |     |     |     |     |     |     |     |     |     |     |     |     |     |     |     |     |     |     |     |     |     |     |     |    |
|-----|-----|-----|-----|-----|-----|-----|-----|-----|-----|-----|-----|-----|-----|-----|-----|-----|-----|-----|-----|-----|-----|-----|-----|-----|-----|-----|-----|-----|-----|-----|-----|-----|-----|-----|-----|-----|-----|-----|-----|-----|-----|-----|-----|-----|-----|-----|-----|-----|-----|-----|-----|----|
| 94  | 136 | 94  | 100 | 105 | 107 | 94  | 80  | 110 | 94  | 100 | 88  | 98  | 94  | 108 | 94  | 89  | 89  | 89  | 91  | 112 | 123 | 72  | 99  | 101 | 101 | 96  | 106 | 101 | 92  | 93  | 98  | 92  | 95  | 99  | 89  | 119 | 124 | 109 | 107 | 95  | 88  | 83  | 94  | 112 | 113 | 124 | 106 | 97  | 97  | 97  | 110 |    |
| 93  | 142 | 107 | 84  | 101 | 113 | 96  | 94  | 86  | 90  | 102 | 78  | 86  | 97  | 89  | 86  | 107 | 83  | 87  | 76  | 96  | 101 | 103 | 114 | 105 | 95  | 98  | 83  | 82  | 96  | 82  | 90  | 81  | 84  | 76  | 99  | 102 | 103 | 104 | 92  | 109 | 87  | 101 | 97  | 104 | 105 | 129 | 76  | 89  | 70  | 106 | 92  |    |
| 92  | 143 | 98  | 104 | 86  | 86  | 92  | 94  | 106 | 100 | 80  | 113 | 103 | 91  | 85  | 104 | 94  | 122 | 111 | 118 | 104 | 114 | 85  | 98  | 106 | 100 | 82  | 101 | 104 | 90  | 110 | 134 | 116 | 106 | 115 | 83  | 124 | 128 | 115 | 118 | 87  | 118 | 114 | 121 | 110 | 108 | 140 | 124 | 89  | 100 | 83  | 87  |    |
| 86  | 140 | 87  | 79  | 91  | 82  | 64  | 89  | 101 | 91  | 70  | 96  | 80  | 90  | 95  | 75  | 93  | 90  | 99  | 108 | 106 | 93  | 97  | 87  | 99  | 85  | 78  | 93  | 100 | 70  | 101 | 91  | 122 | 109 | 99  | 102 | 85  | 115 | 113 | 120 | 103 | 90  | 113 | 103 | 105 | 106 | 100 | 131 | 107 | 80  | 103 | 89  | 81 |
| 105 | 141 | 122 | 78  | 107 | 114 | 109 | 94  | 96  | 108 | 100 | 98  | 90  | 96  | 93  | 89  | 104 | 94  | 101 | 90  | 91  | 90  | 106 | 99  | 89  | 97  | 98  | 96  | 95  | 89  | 97  | 108 | 107 | 102 | 93  | 92  | 104 | 101 | 107 | 104 | 92  | 95  | 107 | 114 | 121 | 116 | 138 | 93  | 104 | 103 | 95  | 110 |    |
| 82  | 147 | 98  | 77  | 93  | 96  | 87  | 98  | 91  | 106 | 106 | 104 | 85  | 99  | 103 | 77  | 106 | 111 | 105 | 97  | 92  | 86  | 100 | 93  | 90  | 106 | 103 | 80  | 80  | 73  | 91  | 116 | 110 | 95  | 99  | 95  | 123 | 106 | 116 | 92  | 103 | 101 | 105 | 120 | 114 | 91  | 140 | 107 | 95  | 89  | 102 | 101 |    |
| 142 | 126 | 120 | 136 | 131 | 136 | 127 | 121 | 137 | 118 | 129 | 116 | 125 | 127 | 126 | 138 | 130 | 126 | 111 | 115 | 115 | 122 | 139 | 131 | 123 | 116 | 133 | 128 | 132 | 131 | 122 | 123 | 101 | 127 | 117 | 128 | 106 | 113 | 101 | 131 | 123 | 125 | 123 | 122 | 118 | 136 | 111 | 108 | 118 | 133 | 125 | 125 |    |
| 92  | 143 | 82  | 88  | 102 | 103 | 88  | 92  | 95  | 77  | 101 | 68  | 99  | 91  | 103 | 81  | 89  | 82  | 78  | 71  | 90  | 105 | 79  | 95  | 82  | 91  | 93  | 79  | 94  | 81  | 73  | 95  | 71  | 78  | 70  | 92  | 111 | 111 | 101 | 97  | 103 | 83  | 94  | 95  | 104 | 110 | 134 | 84  | 92  | 85  | 90  |     |    |
| 77  | 144 | 106 | 64  | 103 | 99  | 97  | 87  | 84  | 94  | 85  | 80  | 77  | 99  | 78  | 90  | 95  | 90  | 96  | 88  | 87  | 98  | 87  | 107 | 101 | 95  | 106 | 92  | 91  | 91  | 93  | 104 | 94  | 74  | 93  | 87  | 111 | 114 | 103 | 93  | 105 | 89  | 99  | 148 | 105 | 101 | 130 | 91  | 99  | 78  | 103 | 104 |    |
| 110 | 131 | 112 | 109 | 121 | 119 | 120 | 133 | 109 | 124 | 109 | 109 | 119 | 121 | 118 | 117 | 123 | 110 | 119 | 111 | 117 | 110 | 119 | 113 | 110 | 108 | 125 | 100 | 109 | 113 | 112 | 120 | 117 | 110 | 117 | 113 | 130 | 131 | 128 | 116 | 116 | 112 | 107 | 98  | 116 | 110 | 116 | 117 | 119 | 122 | 114 |     |    |
| 88  | 139 | 89  | 106 | 95  | 106 | 95  | 102 | 90  | 101 | 85  | 82  | 110 | 101 | 95  | 91  | 107 | 98  | 93  | 99  | 67  | 107 | 96  | 91  | 88  | 91  | 104 | 71  | 74  | 86  | 94  | 109 | 95  | 96  | 111 | 86  | 118 | 107 | 103 | 112 | 71  | 97  | 99  | 103 | 96  | 101 | 136 | 97  | 96  | 92  | 83  | 98  |    |
| 92  | 134 | 107 | 98  | 110 | 107 | 94  | 94  | 96  | 97  | 92  | 71  | 94  | 100 | 75  | 90  | 110 | 91  | 108 | 82  | 85  | 100 | 101 | 110 | 93  | 93  | 97  | 75  | 84  | 91  | 87  | 106 | 88  | 90  | 82  | 87  | 106 | 108 | 114 | 108 | 97  | 91  | 105 | 114 | 111 | 102 | 129 | 85  | 92  | 74  | 105 | 96  |    |
| 94  | 141 | 91  | 88  | 89  | 80  | 73  | 84  | 101 | 94  | 83  | 94  | 91  | 72  | 83  | 86  | 95  | 108 | 91  | 100 | 88  | 101 | 79  | 78  | 84  | 67  | 75  | 93  | 82  | 98  | 121 | 100 | 100 | 100 | 83  | 127 | 121 | 124 | 110 | 70  | 103 | 99  | 114 | 109 | 110 | 138 | 117 | 67  | 109 | 30  | 51  |     |    |
| 93  | 137 | 84  | 83  | 83  | 91  | 83  | 91  | 109 | 93  | 96  | 84  | 75  | 95  | 94  | 89  | 93  | 90  | 89  | 89  | 89  | 100 | 87  | 99  | 84  | 76  | 93  | 84  | 110 | 79  | 114 | 90  | 94  | 88  | 87  | 113 | 110 | 111 | 109 | 95  | 100 | 92  | 98  | 104 | 108 | 125 | 104 | 52  | 99  | 74  | 56  |     |    |
| 88  | 131 | 85  | 87  | 82  | 78  | 87  | 99  | 100 | 102 | 84  | 98  | 88  | 96  | 84  | 94  | 91  | 109 | 100 | 101 | 93  | 105 | 85  | 97  | 92  | 66  | 90  | 96  | 80  | 111 | 86  | 122 | 105 | 98  | 92  | 85  | 115 | 115 | 117 | 106 | 95  | 111 | 103 | 114 | 106 | 107 | 128 | 119 | 71  | 104 | 72  | 54  |    |
| 109 | 142 | 89  | 117 | 102 | 120 | 104 | 108 | 113 | 105 | 112 | 103 | 120 | 107 | 119 | 106 | 125 | 122 | 103 | 113 | 99  | 116 | 113 | 112 | 103 | 112 | 124 | 102 | 107 | 101 | 99  | 119 | 100 | 96  | 97  | 108 | 100 | 101 | 86  | 108 | 110 | 112 | 111 | 126 | 111 | 115 | 128 | 111 | 701 | 108 | 108 | 109 |    |
| 105 | 140 | 103 | 93  | 110 | 107 | 101 | 107 | 101 | 101 | 97  | 94  | 91  | 98  | 82  | 114 | 102 | 92  | 99  | 75  | 99  | 98  | 85  | 91  | 87  | 89  | 84  | 91  | 93  | 85  | 104 | 102 | 90  | 106 | 84  | 121 | 108 | 110 | 100 | 86  | 109 | 117 | 114 | 119 | 110 | 136 | 107 | 90  | 107 | 87  | 88  |     |    |
| 0   | 145 | 94  | 72  | 82  | 91  | 96  | 109 | 83  | 98  | 82  | 100 | 84  | 84  | 93  | 89  | 71  | 101 | 105 | 97  | 86  | 102 | 77  | 106 | 92  | 102 | 101 | 87  | 79  | 83  | 100 | 111 | 103 | 93  | 89  | 78  | 127 | 125 | 121 | 102 | 96  | 96  | 112 | 104 | 102 | 141 | 107 | 98  | 71  | 101 | 84  |     |    |
| 145 | 0   | 142 | 151 | 141 | 144 | 138 | 145 | 151 | 138 | 141 | 140 | 141 | 144 | 140 | 144 | 137 | 136 | 139 | 144 | 138 | 145 | 146 | 143 | 137 | 132 | 145 | 146 | 143 | 143 | 147 | 133 | 141 | 141 | 142 | 144 | 125 | 141 | 132 | 142 | 146 | 144 | 135 | 135 | 132 | 146 | 89  | 135 | 137 | 148 | 138 | 146 |    |
| 94  | 142 | 0   | 102 | 93  | 115 | 92  | 100 | 91  | 86  | 96  | 89  | 103 | 94  | 86  | 83  | 105 | 104 | 102 | 102 | 93  | 116 | 92  | 90  | 103 | 97  | 111 | 95  | 75  | 91  | 77  | 117 | 101 | 83  | 96  | 97  | 124 | 114 | 119 | 103 | 98  | 94  | 97  | 101 | 106 | 96  | 129 | 117 | 94  | 91  | 99  | 92  |    |
| 72  | 151 | 102 | 0   | 90  | 84  | 98  | 93  | 88  | 99  | 84  | 90  | 75  | 91  | 88  | 76  | 83  | 90  | 92  | 83  | 92  | 86  | 77  | 101 | 91  | 92  | 98  | 85  | 70  | 84  | 88  | 108 | 100 | 73  | 68  | 76  | 113 | 111 | 116 | 95  | 100 | 94  | 96  | 113 | 122 | 100 | 144 | 104 | 88  | 73  | 100 | 88  |    |
| 82  | 141 | 93  | 90  | 0   | 95  | 87  | 98  | 100 | 71  | 94  | 113 | 87  | 83  | 104 | 84  | 78  | 115 | 103 | 117 | 102 | 98  | 90  | 117 | 97  | 95  | 89  | 100 | 93  | 88  | 94  | 129 | 109 | 107 | 99  | 91  | 122 | 121 | 113 | 110 | 113 | 114 | 105 | 122 | 113 | 107 | 134 | 112 | 72  | 97  | 106 | 89  |    |
| 91  | 144 | 115 | 84  | 95  | 0   | 88  | 105 | 106 | 101 | 80  | 114 | 94  | 99  | 89  | 95  | 91  | 115 | 114 | 100 | 107 | 89  | 86  | 100 | 86  | 94  | 98  | 97  | 87  | 90  | 96  | 129 | 110 | 107 | 104 | 91  | 119 | 120 | 122 | 102 | 97  | 105 | 107 | 121 | 109 | 94  | 138 | 118 | 96  | 112 | 90  | 85  |    |
| 96  | 138 | 92  | 98  | 87  | 88  | 0   | 86  | 111 | 84  | 86  | 89  | 83  | 100 | 86  | 101 | 96  | 96  | 104 | 100 | 97  | 97  | 96  | 99  | 83  | 82  | 90  | 106 | 86  | 97  | 81  | 120 | 98  | 91  | 103 | 93  | 112 | 119 | 117 | 100 | 97  | 92  | 101 | 98  | 101 | 107 | 128 | 107 | 93  | 97  | 79  | 92  |    |
| 109 | 145 | 100 | 93  | 98  | 105 | 86  | 0   | 109 | 100 | 85  | 93  | 76  | 83  | 86  | 103 | 95  | 98  | 85  | 96  | 109 | 90  | 90  | 88  | 112 | 102 | 112 | 90  | 82  | 92  | 96  | 110 | 113 | 109 | 97  | 86  | 97  | 104 | 110 | 119 | 106 | 131 | 104 | 91  | 93  | 86  | 94  | 93  | 86  | 94  |     |     |    |
| 83  | 151 | 91  | 88  | 100 | 106 | 111 | 109 | 0   | 107 | 91  | 97  | 105 | 87  | 92  | 65  | 107 | 100 | 100 | 99  | 102 | 76  | 74  | 101 | 99  | 104 | 106 | 76  | 83  | 70  | 80  | 106 | 114 | 81  | 92  | 103 | 121 | 114 | 115 | 96  | 101 | 103 | 113 | 119 | 118 | 83  | 142 | 115 | 110 | 89  | 101 | 101 |    |
| 98  | 138 | 86  | 99  | 71  | 101 | 84  | 100 | 107 | 0   | 111 | 100 | 97  | 81  | 106 | 87  | 74  | 101 | 95  | 99  | 105 | 110 | 94  | 105 | 102 | 90  | 84  | 105 | 93  | 94  | 94  | 117 | 87  | 101 | 86  | 98  | 112 | 116 | 108 | 102 | 107 | 99  | 99  | 102 | 105 | 113 | 135 | 95  | 82  | 92  | 105 | 98  |    |
| 82  | 141 | 96  | 84  | 94  | 80  | 86  | 86  | 91  | 111 | 0   | 92  | 93  | 86  | 93  | 101 | 80  | 98  | 102 | 100 | 92  | 111 | 87  | 90  | 91  | 82  | 95  | 95  | 82  | 87  | 89  | 130 | 108 | 88  | 108 | 84  | 124 | 122 | 121 | 113 | 90  | 110 | 108 | 109 | 111 | 104 | 133 | 122 | 104 | 88  | 89  | 93  |    |
| 100 | 140 | 89  | 90  | 113 | 114 | 89  | 93  | 97  | 100 | 92  | 0   | 99  | 108 | 90  | 87  | 112 | 51  | 97  | 78  | 73  | 112 | 97  | 104 | 102 | 85  | 112 | 87  | 66  | 99  | 77  | 99  | 79  | 63  | 91  | 87  | 111 | 107 | 104 | 109 | 97  | 75  | 86  | 84  | 106 | 120 | 131 | 89  | 96  | 79  | 94  | 104 |    |
| 84  | 141 | 103 | 75  | 87  | 94  | 83  | 76  | 105 | 97  | 93  | 99  | 0   | 77  | 86  | 93  | 77  | 97  | 100 | 96  | 89  | 90  | 110 | 101 | 75  | 82  | 98  | 85  | 97  | 86  | 121 | 104 | 105 | 99  | 84  | 118 | 116 | 118 | 100 | 95  | 101 | 97  | 111 | 108 | 102 | 127 | 95  | 71  | 96  | 97  | 89  |     |    |
| 84  | 144 | 94  | 91  | 83  | 99  | 100 | 83  | 87  | 81  | 86  | 108 | 77  | 0   | 95  | 74  | 75  | 105 | 93  | 112 | 101 | 103 | 75  | 89  | 93  | 88  | 70  | 94  | 90  | 82  | 99  | 129 | 100 | 96  | 87  | 91  | 131 | 130 | 129 | 113 | 91  | 112 | 108 | 132 | 120 | 116 | 136 | 103 | 87  | 115 | 77  | 83  |    |
| 93  | 140 | 86  | 88  | 104 | 89  | 86  | 86  | 92  | 106 | 53  | 90  | 86  | 95  | 0   | 103 | 90  | 98  | 102 | 98  | 93  | 89  | 101 | 91  | 80  | 87  | 97  | 78  | 96  | 96  | 118 | 104 |     |     |     |     |     |     |     |     |     |     |     |     |     |     |     |     |     |     |     |     |    |

|     |     |     |     |     |     |     |     |     |     |     |     |     |     |     |     |     |     |     |     |     |     |     |     |     |     |     |     |     |     |     |     |     |     |     |     |     |     |     |     |     |     |     |     |     |     |     |     |     |     |     |     |
|-----|-----|-----|-----|-----|-----|-----|-----|-----|-----|-----|-----|-----|-----|-----|-----|-----|-----|-----|-----|-----|-----|-----|-----|-----|-----|-----|-----|-----|-----|-----|-----|-----|-----|-----|-----|-----|-----|-----|-----|-----|-----|-----|-----|-----|-----|-----|-----|-----|-----|-----|-----|
| 89  | 144 | 92  | 97  | 102 | 93  | 106 | 108 | 82  | 104 | 89  | 96  | 97  | 92  | 91  | 94  | 99  | 109 | 105 | 96  | 90  | 92  | 92  | 94  | 80  | 95  | 108 | 78  | 95  | 71  | 97  | 115 | 105 | 94  | 107 | 88  | 122 | 109 | 115 | 116 | 85  | 101 | 115 | 129 | 114 | 101 | 134 | 110 | 97  | 96  | 88  | 89  |
| 103 | 144 | 110 | 92  | 104 | 90  | 91  | 100 | 91  | 109 | 90  | 105 | 93  | 101 | 77  | 93  | 100 | 110 | 100 | 105 | 84  | 99  | 93  | 95  | 100 | 92  | 90  | 91  | 94  | 89  | 89  | 120 | 112 | 103 | 120 | 88  | 117 | 106 | 99  | 96  | 84  | 111 | 112 | 112 | 116 | 87  | 124 | 101 | 98  | 115 | 95  | 108 |
| 132 | 120 | 140 | 130 | 134 | 136 | 137 | 132 | 138 | 128 | 131 | 126 | 129 | 139 | 137 | 138 | 130 | 126 | 126 | 125 | 131 | 138 | 126 | 143 | 122 | 132 | 135 | 129 | 140 | 135 | 134 | 106 | 113 | 129 | 124 | 136 | 126 | 128 | 120 | 130 | 137 | 131 | 119 | 121 | 115 | 129 | 102 | 114 | 128 | 123 | 136 | 136 |
| 132 | 115 | 131 | 133 | 135 | 138 | 133 | 133 | 139 | 129 | 139 | 120 | 128 | 140 | 126 | 138 | 127 | 123 | 123 | 133 | 127 | 134 | 140 | 126 | 127 | 135 | 128 | 133 | 137 | 138 | 102 | 104 | 136 | 119 | 136 | 119 | 121 | 117 | 131 | 130 | 124 | 112 | 114 | 112 | 130 | 94  | 104 | 128 | 126 | 137 | 136 |     |
| 78  | 140 | 92  | 67  | 89  | 82  | 100 | 102 | 91  | 94  | 87  | 88  | 85  | 92  | 83  | 78  | 84  | 96  | 96  | 89  | 83  | 86  | 94  | 92  | 91  | 88  | 107 | 85  | 70  | 77  | 90  | 111 | 94  | 97  | 81  | 80  | 119 | 102 | 105 | 109 | 90  | 99  | 92  | 115 | 111 | 103 | 131 | 96  | 91  | 95  | 86  | 93  |
| 93  | 144 | 99  | 90  | 91  | 101 | 90  | 107 | 80  | 103 | 92  | 90  | 95  | 103 | 91  | 89  | 112 | 96  | 96  | 97  | 96  | 100 | 93  | 111 | 95  | 99  | 97  | 75  | 79  | 83  | 80  | 101 | 93  | 87  | 96  | 101 | 103 | 113 | 109 | 101 | 111 | 98  | 102 | 110 | 102 | 102 | 140 | 99  | 93  | 75  | 106 | 93  |
| 112 | 143 | 100 | 113 | 107 | 110 | 101 | 115 | 105 | 109 | 98  | 98  | 107 | 110 | 100 | 107 | 112 | 111 | 110 | 97  | 98  | 111 | 105 | 112 | 102 | 100 | 112 | 84  | 91  | 103 | 94  | 108 | 112 | 93  | 121 | 98  | 114 | 109 | 113 | 115 | 104 | 102 | 107 | 122 | 106 | 114 | 137 | 102 | 100 | 104 | 93  | 101 |
| 104 | 147 | 103 | 84  | 109 | 111 | 97  | 99  | 114 | 104 | 105 | 77  | 94  | 114 | 99  | 108 | 114 | 94  | 91  | 85  | 84  | 105 | 111 | 111 | 92  | 92  | 113 | 97  | 91  | 109 | 98  | 112 | 81  | 91  | 98  | 91  | 99  | 96  | 100 | 108 | 89  | 100 | 102 | 97  | 109 | 113 | 137 | 92  | 100 | 88  | 93  | 94  |
| 104 | 146 | 94  | 98  | 114 | 103 | 84  | 95  | 94  | 105 | 98  | 88  | 94  | 105 | 97  | 96  | 120 | 101 | 103 | 98  | 76  | 105 | 99  | 93  | 91  | 94  | 106 | 89  | 88  | 93  | 75  | 115 | 102 | 97  | 100 | 87  | 114 | 110 | 103 | 104 | 98  | 100 | 111 | 113 | 110 | 100 | 133 | 104 | 97  | 108 | 94  | 104 |
| 115 | 131 | 109 | 118 | 114 | 135 | 132 | 120 | 126 | 115 | 124 | 114 | 111 | 125 | 117 | 118 | 116 | 121 | 119 | 117 | 106 | 108 | 126 | 129 | 116 | 115 | 126 | 116 | 122 | 109 | 127 | 119 | 107 | 128 | 110 | 120 | 118 | 116 | 110 | 126 | 116 | 111 | 111 | 113 | 115 | 129 | 100 | 110 | 112 | 101 | 125 | 128 |
| 82  | 150 | 75  | 74  | 95  | 88  | 82  | 94  | 76  | 94  | 76  | 65  | 79  | 79  | 86  | 74  | 100 | 79  | 92  | 93  | 72  | 108 | 92  | 81  | 90  | 91  | 103 | 85  | 48  | 72  | 72  | 119 | 88  | 80  | 84  | 83  | 121 | 105 | 111 | 104 | 88  | 96  | 91  | 96  | 104 | 100 | 137 | 97  | 96  | 94  | 85  | 97  |
| 80  | 145 | 116 | 68  | 104 | 91  | 101 | 101 | 87  | 95  | 97  | 92  | 90  | 101 | 87  | 83  | 93  | 101 | 95  | 87  | 106 | 93  | 93  | 95  | 107 | 109 | 96  | 95  | 87  | 84  | 103 | 102 | 90  | 96  | 78  | 91  | 107 | 108 | 107 | 93  | 100 | 103 | 107 | 106 | 116 | 92  | 139 | 94  | 96  | 81  | 112 | 104 |
| 93  | 146 | 97  | 83  | 109 | 86  | 93  | 95  | 82  | 106 | 70  | 88  | 92  | 76  | 80  | 82  | 99  | 97  | 111 | 93  | 89  | 106 | 77  | 83  | 90  | 87  | 83  | 89  | 77  | 92  | 70  | 119 | 115 | 74  | 105 | 86  | 117 | 126 | 126 | 107 | 89  | 103 | 107 | 126 | 114 | 103 | 143 | 118 | 93  | 102 | 88  | 86  |





|     |     |     |     |     |     |     |     |     |     |     |     |     |     |     |     |     |     |     |
|-----|-----|-----|-----|-----|-----|-----|-----|-----|-----|-----|-----|-----|-----|-----|-----|-----|-----|-----|
| 75  | 90  | 95  | 90  | 98  | 117 | 116 | 118 | 126 | 121 | 94  | 88  | 120 | 103 | 102 | 109 | 84  | 93  | 115 |
| 122 | 112 | 121 | 125 | 123 | 117 | 120 | 124 | 125 | 119 | 117 | 117 | 120 | 116 | 128 | 107 | 119 | 124 | 129 |
| 125 | 130 | 121 | 117 | 130 | 147 | 114 | 114 | 148 | 146 | 118 | 129 | 133 | 129 | 126 | 139 | 123 | 120 | 119 |
| 125 | 132 | 123 | 121 | 130 | 147 | 117 | 114 | 147 | 145 | 124 | 132 | 132 | 129 | 129 | 140 | 126 | 126 | 117 |
| 107 | 110 | 109 | 125 | 108 | 98  | 117 | 125 | 116 | 110 | 120 | 97  | 118 | 113 | 125 | 101 | 114 | 120 | 120 |
| 108 | 116 | 103 | 107 | 124 | 142 | 94  | 113 | 147 | 143 | 106 | 119 | 121 | 124 | 119 | 131 | 111 | 104 | 91  |
| 126 | 127 | 126 | 123 | 114 | 111 | 119 | 118 | 117 | 111 | 122 | 127 | 129 | 113 | 123 | 107 | 122 | 125 | 129 |
| 126 | 127 | 126 | 123 | 114 | 111 | 119 | 118 | 117 | 111 | 122 | 127 | 129 | 113 | 123 | 107 | 122 | 125 | 129 |
| 126 | 127 | 126 | 123 | 114 | 111 | 119 | 118 | 117 | 111 | 122 | 127 | 129 | 113 | 123 | 107 | 122 | 125 | 129 |
| 126 | 127 | 126 | 123 | 114 | 111 | 119 | 118 | 117 | 111 | 122 | 127 | 129 | 113 | 123 | 107 | 122 | 125 | 129 |
| 120 | 127 | 121 | 129 | 128 | 138 | 122 | 132 | 143 | 140 | 121 | 124 | 130 | 132 | 130 | 129 | 129 | 131 | 127 |
| 143 | 131 | 148 | 133 | 141 | 116 | 134 | 142 | 109 | 102 | 135 | 141 | 142 | 135 | 141 | 124 | 142 | 141 | 141 |
| 100 | 108 | 102 | 103 | 119 | 141 | 89  | 93  | 146 | 146 | 106 | 107 | 112 | 119 | 106 | 127 | 102 | 101 | 94  |
| 116 | 125 | 114 | 128 | 132 | 139 | 114 | 123 | 146 | 147 | 125 | 128 | 121 | 128 | 118 | 131 | 122 | 126 | 112 |
| 110 | 98  | 89  | 100 | 73  | 115 | 107 | 88  | 115 | 112 | 100 | 97  | 96  | 94  | 89  | 112 | 95  | 94  | 101 |
| 108 | 99  | 89  | 100 | 74  | 116 | 109 | 89  | 115 | 114 | 102 | 97  | 97  | 95  | 90  | 113 | 96  | 95  | 101 |
| 110 | 98  | 89  | 100 | 73  | 115 | 107 | 88  | 115 | 112 | 100 | 97  | 96  | 94  | 89  | 112 | 95  | 94  | 101 |
| 110 | 98  | 89  | 100 | 73  | 115 | 107 | 88  | 115 | 112 | 100 | 97  | 96  | 94  | 89  | 112 | 95  | 94  | 101 |
| 110 | 98  | 89  | 100 | 73  | 115 | 107 | 88  | 115 | 112 | 100 | 97  | 96  | 94  | 89  | 112 | 95  | 94  | 101 |
| 110 | 98  | 89  | 100 | 73  | 115 | 107 | 88  | 115 | 112 | 100 | 97  | 96  | 94  | 89  | 112 | 95  | 94  | 101 |
| 110 | 98  | 89  | 100 | 73  | 115 | 107 | 88  | 115 | 112 | 100 | 97  | 96  | 94  | 89  | 112 | 95  | 94  | 101 |
| 110 | 98  | 89  | 100 | 73  | 115 | 107 | 88  | 115 | 112 | 100 | 97  | 96  | 94  | 89  | 112 | 95  | 94  | 101 |
| 110 | 98  | 89  | 100 | 73  | 115 | 107 | 88  | 115 | 112 | 100 | 97  | 96  | 94  | 89  | 112 | 95  | 94  | 101 |
| 110 | 98  | 89  | 100 | 73  | 115 | 107 | 88  | 115 | 112 | 100 | 97  | 96  | 94  | 89  | 112 | 95  | 94  | 101 |
| 110 | 98  | 89  | 100 | 73  | 115 | 107 | 88  | 115 | 112 | 100 | 97  | 96  | 94  | 89  | 112 | 95  | 94  | 101 |
| 110 | 98  | 89  | 100 | 73  | 115 | 107 | 88  | 115 | 112 | 100 | 97  | 96  | 94  | 89  | 112 | 95  | 94  | 101 |
| 110 | 98  | 89  | 100 | 73  | 115 | 107 | 88  | 115 | 112 | 100 | 97  | 96  | 94  | 89  | 112 | 95  | 94  | 101 |
| 109 | 97  | 88  | 99  | 72  | 114 | 106 | 89  | 116 | 113 | 99  | 96  | 95  | 93  | 89  | 111 | 95  | 93  | 100 |
| 122 | 131 | 124 | 125 | 134 | 147 | 123 | 128 | 150 | 146 | 128 | 130 | 135 | 133 | 135 | 140 | 126 | 128 | 122 |
| 126 | 132 | 128 | 122 | 134 | 145 | 122 | 122 | 152 | 146 | 124 | 131 | 133 | 132 | 135 | 142 | 127 | 126 | 120 |
| 126 | 132 | 128 | 122 | 134 | 145 | 122 | 122 | 152 | 146 | 124 | 131 | 133 | 132 | 135 | 142 | 127 | 126 | 120 |
| 126 | 132 | 128 | 122 | 134 | 145 | 122 | 122 | 152 | 146 | 124 | 131 | 133 | 132 | 135 | 142 | 127 | 126 | 120 |
| 122 | 131 | 124 | 125 | 134 | 147 | 123 | 128 | 150 | 146 | 128 | 130 | 135 | 133 | 135 | 140 | 126 | 128 | 122 |
| 122 | 131 | 124 | 125 | 134 | 147 | 123 | 128 | 150 | 146 | 128 | 130 | 135 | 133 | 135 | 140 | 126 | 128 | 122 |
| 127 | 130 | 126 | 121 | 130 | 144 | 121 | 116 | 148 | 146 | 129 | 132 | 139 | 131 | 129 | 140 | 128 | 126 | 119 |
| 126 | 132 | 128 | 122 | 134 | 145 | 122 | 122 | 152 | 146 | 124 | 131 | 133 | 132 | 135 | 142 | 127 | 126 | 120 |
| 126 | 132 | 128 | 122 | 134 | 145 | 122 | 122 | 152 | 146 | 124 | 131 | 133 | 132 | 135 | 142 | 127 | 126 | 120 |
| 126 | 132 | 128 | 122 | 134 | 145 | 122 | 122 | 152 | 146 | 124 | 131 | 133 | 132 | 135 | 142 | 127 | 126 | 120 |
| 121 | 124 | 123 | 122 | 127 | 139 | 121 | 116 | 141 | 139 | 113 | 122 | 131 | 108 | 123 | 130 | 117 | 117 | 128 |
| 126 | 125 | 123 | 131 | 121 | 114 | 119 | 124 | 111 | 109 | 125 | 126 | 124 | 123 | 125 | 112 | 122 | 130 | 129 |
| 100 | 96  | 86  | 107 | 102 | 126 | 97  | 85  | 131 | 140 | 94  | 102 | 79  | 105 | 89  | 118 | 87  | 110 | 96  |
| 100 | 96  | 86  | 107 | 102 | 126 | 97  | 85  | 131 | 140 | 94  | 102 | 79  | 105 | 89  | 118 | 87  | 110 | 96  |
| 100 | 96  | 86  | 107 | 102 | 126 | 97  | 85  | 131 | 140 | 94  | 102 | 79  | 105 | 89  | 118 | 87  | 110 | 96  |
| 100 | 96  | 86  | 107 | 102 | 126 | 97  | 85  | 131 | 140 | 94  | 102 | 79  | 105 | 89  | 118 | 87  | 110 | 96  |
| 91  | 101 | 88  | 115 | 96  | 127 | 93  | 102 | 132 | 130 | 100 | 99  | 100 | 106 | 106 | 110 | 96  | 106 | 96  |
| 120 | 124 | 120 | 110 | 107 | 94  | 119 | 113 | 114 | 99  | 107 | 118 | 128 | 107 | 120 | 103 | 114 | 108 | 126 |
| 92  | 92  | 85  | 105 | 100 | 127 | 98  | 96  | 132 | 128 | 97  | 101 | 104 | 104 | 106 | 122 | 102 | 105 | 98  |
| 128 | 129 | 117 | 129 | 124 | 138 | 119 | 119 | 145 | 137 | 122 | 121 | 124 | 118 | 121 | 127 | 125 | 125 | 119 |
| 91  | 91  | 108 | 106 | 89  | 118 | 114 | 118 | 132 | 118 | 83  | 95  | 115 | 93  | 96  | 103 | 80  | 99  | 110 |
| 144 | 133 | 144 | 139 | 143 | 107 | 137 | 138 | 104 | 102 | 139 | 143 | 139 | 140 | 144 | 115 | 148 | 143 | 148 |
| 120 | 118 | 123 | 112 | 119 | 141 | 115 | 112 | 143 | 142 | 105 | 125 | 124 | 118 | 124 | 126 | 109 | 118 | 121 |
| 89  | 89  | 106 | 104 | 88  | 118 | 113 | 116 | 130 | 117 | 81  | 94  | 114 | 91  | 95  | 103 | 78  | 97  | 109 |
| 89  | 89  | 106 | 104 | 88  | 118 | 113 | 116 | 130 | 117 | 81  | 94  | 114 | 91  | 95  | 103 | 78  | 97  | 109 |
| 89  | 89  | 106 | 104 | 88  | 118 | 113 | 116 | 130 | 117 | 81  | 94  | 114 | 91  | 95  | 103 | 78  | 97  | 109 |
| 148 | 134 | 148 | 142 | 149 | 110 | 146 | 143 | 108 | 113 | 151 | 148 | 132 | 145 | 143 | 130 | 151 | 152 | 144 |
| 111 | 106 | 112 | 108 | 113 | 108 | 109 | 113 | 119 | 119 | 100 | 107 | 109 | 105 | 116 | 104 | 104 | 120 | 118 |
| 125 | 123 | 122 | 117 | 127 | 137 | 129 | 133 | 141 | 136 | 117 | 124 | 132 | 103 | 123 | 120 | 116 | 124 | 132 |
| 119 | 124 | 123 | 128 | 119 | 88  | 127 | 130 | 114 | 96  | 120 | 120 | 127 | 119 | 131 | 92  | 120 | 131 | 133 |
| 101 | 105 | 90  | 92  | 117 | 146 | 86  | 90  | 145 | 141 | 99  | 111 | 116 | 121 | 101 | 140 | 94  | 94  | 81  |
| 95  | 107 | 91  | 89  | 118 | 138 | 84  | 85  | 137 | 140 | 84  | 108 | 108 | 106 | 106 | 131 | 94  | 105 | 86  |
| 131 | 117 | 124 | 133 | 107 | 89  | 130 | 130 | 109 | 105 | 120 | 117 | 117 | 119 | 118 | 95  | 118 | 127 | 140 |
| 125 | 124 | 123 | 127 | 118 | 93  | 123 | 124 | 109 | 101 | 122 | 115 | 128 | 115 | 127 | 103 | 125 | 117 | 133 |
| 101 | 111 | 111 | 108 | 107 | 115 | 108 | 127 | 135 | 129 | 102 | 110 | 129 | 108 | 121 | 114 | 103 | 100 | 105 |
| 120 | 119 | 125 | 126 | 119 | 112 | 123 | 126 | 121 | 114 | 118 | 117 | 119 | 117 | 128 | 111 | 118 | 126 | 137 |
| 103 | 116 | 101 | 99  | 118 | 150 | 98  | 103 | 147 | 148 | 116 | 114 | 121 | 132 | 113 | 134 | 106 | 104 | 91  |
| 114 | 115 | 121 | 125 | 108 | 93  | 126 | 119 | 103 | 98  | 118 | 117 | 120 | 116 | 105 | 91  | 113 | 114 | 134 |

|     |     |     |     |     |     |     |     |     |     |     |     |     |     |     |     |     |     |     |
|-----|-----|-----|-----|-----|-----|-----|-----|-----|-----|-----|-----|-----|-----|-----|-----|-----|-----|-----|
| 137 | 137 | 138 | 134 | 139 | 145 | 130 | 136 | 142 | 146 | 138 | 141 | 134 | 133 | 140 | 139 | 137 | 138 | 135 |
| 78  | 53  | 70  | 87  | 85  | 119 | 98  | 97  | 119 | 118 | 91  | 79  | 95  | 84  | 93  | 110 | 74  | 103 | 94  |
| 90  | 72  | 89  | 74  | 90  | 114 | 79  | 82  | 127 | 122 | 78  | 92  | 109 | 92  | 78  | 102 | 82  | 93  | 93  |
| 95  | 83  | 80  | 92  | 81  | 98  | 111 | 109 | 114 | 118 | 104 | 83  | 88  | 96  | 94  | 103 | 91  | 90  | 93  |
| 125 | 116 | 115 | 96  | 108 | 108 | 108 | 108 | 122 | 117 | 107 | 113 | 124 | 97  | 112 | 108 | 115 | 113 | 123 |
| 102 | 95  | 101 | 78  | 104 | 122 | 103 | 100 | 136 | 130 | 83  | 101 | 108 | 96  | 105 | 112 | 91  | 104 | 96  |
| 123 | 106 | 98  | 81  | 82  | 121 | 110 | 86  | 122 | 127 | 93  | 107 | 104 | 91  | 84  | 118 | 99  | 86  | 105 |
| 90  | 83  | 48  | 80  | 54  | 127 | 94  | 91  | 130 | 136 | 95  | 66  | 99  | 101 | 88  | 126 | 81  | 75  | 64  |
| 143 | 147 | 147 | 141 | 143 | 133 | 144 | 149 | 109 | 117 | 143 | 148 | 136 | 143 | 149 | 128 | 143 | 146 | 146 |
| 103 | 95  | 98  | 112 | 106 | 123 | 118 | 111 | 130 | 126 | 108 | 99  | 109 | 100 | 105 | 120 | 107 | 109 | 117 |
| 91  | 90  | 84  | 85  | 105 | 140 | 90  | 83  | 135 | 137 | 87  | 100 | 96  | 97  | 91  | 124 | 85  | 102 | 102 |
| 144 | 138 | 146 | 140 | 140 | 114 | 144 | 147 | 120 | 112 | 143 | 144 | 140 | 148 | 147 | 130 | 149 | 144 | 145 |
| 135 | 135 | 148 | 139 | 144 | 118 | 140 | 146 | 111 | 105 | 138 | 142 | 144 | 144 | 142 | 132 | 142 | 142 | 144 |
| 87  | 89  | 97  | 92  | 94  | 132 | 93  | 88  | 134 | 134 | 75  | 100 | 111 | 96  | 83  | 117 | 81  | 93  | 100 |
| 94  | 100 | 91  | 83  | 116 | 141 | 94  | 99  | 136 | 136 | 83  | 107 | 108 | 110 | 104 | 132 | 94  | 103 | 100 |
| 94  | 100 | 90  | 92  | 101 | 113 | 93  | 76  | 122 | 119 | 82  | 112 | 109 | 94  | 104 | 111 | 96  | 86  | 102 |
| 104 | 103 | 81  | 103 | 101 | 121 | 102 | 95  | 130 | 132 | 89  | 101 | 106 | 106 | 98  | 130 | 96  | 110 | 97  |
| 77  | 83  | 93  | 91  | 83  | 121 | 85  | 89  | 131 | 128 | 65  | 92  | 108 | 92  | 75  | 107 | 69  | 71  | 110 |
| 95  | 99  | 83  | 84  | 106 | 135 | 87  | 82  | 134 | 140 | 92  | 99  | 103 | 108 | 97  | 136 | 92  | 93  | 83  |
| 100 | 82  | 87  | 99  | 97  | 122 | 107 | 112 | 129 | 132 | 111 | 98  | 109 | 99  | 111 | 130 | 103 | 114 | 104 |
| 121 | 118 | 120 | 102 | 113 | 116 | 113 | 107 | 120 | 118 | 103 | 119 | 123 | 91  | 128 | 118 | 123 | 106 | 123 |
| 79  | 74  | 60  | 78  | 82  | 134 | 86  | 74  | 137 | 141 | 76  | 78  | 89  | 97  | 77  | 125 | 57  | 84  | 63  |
| 92  | 100 | 86  | 100 | 108 | 128 | 91  | 99  | 131 | 137 | 90  | 96  | 95  | 100 | 104 | 127 | 88  | 103 | 83  |
| 145 | 133 | 151 | 139 | 143 | 117 | 141 | 144 | 119 | 118 | 144 | 142 | 140 | 145 | 145 | 128 | 148 | 148 | 145 |
| 90  | 101 | 100 | 107 | 101 | 119 | 104 | 108 | 129 | 124 | 94  | 94  | 116 | 103 | 109 | 123 | 98  | 99  | 99  |
| 96  | 80  | 89  | 81  | 94  | 115 | 70  | 84  | 128 | 118 | 86  | 100 | 109 | 98  | 80  | 108 | 81  | 91  | 85  |
| 99  | 106 | 92  | 98  | 113 | 137 | 105 | 105 | 135 | 143 | 92  | 101 | 107 | 117 | 118 | 131 | 101 | 104 | 103 |
| 102 | 107 | 89  | 95  | 76  | 125 | 98  | 82  | 137 | 129 | 86  | 92  | 111 | 94  | 100 | 133 | 92  | 96  | 86  |
| 82  | 97  | 90  | 79  | 104 | 114 | 101 | 105 | 122 | 123 | 81  | 102 | 119 | 105 | 107 | 100 | 98  | 96  | 102 |
| 101 | 105 | 105 | 96  | 106 | 133 | 92  | 98  | 139 | 129 | 75  | 120 | 121 | 109 | 101 | 119 | 97  | 95  | 106 |
| 90  | 93  | 88  | 89  | 110 | 141 | 97  | 89  | 138 | 133 | 80  | 107 | 106 | 111 | 102 | 127 | 92  | 102 | 96  |
| 68  | 58  | 73  | 93  | 69  | 105 | 97  | 94  | 121 | 123 | 81  | 74  | 82  | 92  | 75  | 106 | 74  | 102 | 87  |
| 124 | 118 | 122 | 130 | 112 | 124 | 127 | 123 | 127 | 124 | 111 | 115 | 121 | 94  | 124 | 106 | 117 | 122 | 139 |
| 95  | 98  | 87  | 91  | 107 | 140 | 70  | 69  | 140 | 137 | 78  | 110 | 108 | 97  | 91  | 123 | 88  | 87  | 88  |
| 132 | 114 | 135 | 120 | 123 | 106 | 132 | 133 | 111 | 101 | 125 | 125 | 129 | 124 | 134 | 111 | 129 | 127 | 143 |
| 89  | 95  | 89  | 77  | 100 | 112 | 104 | 104 | 120 | 121 | 92  | 100 | 108 | 102 | 105 | 114 | 91  | 92  | 94  |
| 80  | 79  | 79  | 88  | 95  | 115 | 104 | 99  | 126 | 130 | 100 | 83  | 95  | 104 | 97  | 123 | 77  | 114 | 86  |
| 106 | 88  | 89  | 86  | 86  | 115 | 106 | 90  | 125 | 129 | 105 | 92  | 103 | 95  | 95  | 114 | 93  | 96  | 107 |
| 106 | 97  | 98  | 86  | 98  | 118 | 96  | 112 | 120 | 126 | 93  | 99  | 110 | 81  | 94  | 115 | 87  | 94  | 89  |
| 93  | 69  | 77  | 77  | 74  | 121 | 92  | 99  | 134 | 132 | 84  | 84  | 92  | 85  | 85  | 124 | 74  | 88  | 88  |
| 94  | 100 | 86  | 111 | 114 | 130 | 74  | 94  | 137 | 133 | 90  | 113 | 104 | 104 | 109 | 122 | 95  | 101 | 84  |
| 88  | 98  | 103 | 98  | 111 | 127 | 101 | 91  | 127 | 126 | 84  | 101 | 105 | 98  | 109 | 119 | 87  | 103 | 101 |
| 139 | 142 | 138 | 134 | 129 | 118 | 137 | 137 | 101 | 104 | 135 | 141 | 133 | 135 | 141 | 121 | 138 | 133 | 140 |
| 114 | 106 | 87  | 101 | 92  | 132 | 95  | 88  | 137 | 133 | 98  | 114 | 99  | 104 | 92  | 132 | 95  | 94  | 89  |
| 97  | 84  | 91  | 89  | 89  | 115 | 99  | 101 | 125 | 125 | 85  | 91  | 103 | 90  | 82  | 112 | 67  | 97  | 93  |
| 104 | 95  | 90  | 89  | 85  | 122 | 112 | 85  | 127 | 124 | 99  | 98  | 107 | 99  | 96  | 117 | 96  | 92  | 113 |
| 93  | 95  | 83  | 93  | 97  | 138 | 77  | 68  | 138 | 138 | 80  | 104 | 107 | 104 | 87  | 125 | 94  | 78  | 95  |
| 103 | 105 | 86  | 92  | 92  | 128 | 105 | 87  | 130 | 135 | 99  | 107 | 97  | 107 | 82  | 131 | 101 | 102 | 92  |
| 117 | 120 | 121 | 110 | 110 | 94  | 123 | 117 | 110 | 101 | 113 | 118 | 125 | 108 | 116 | 96  | 124 | 120 | 126 |
| 96  | 97  | 106 | 103 | 111 | 136 | 91  | 99  | 135 | 135 | 84  | 109 | 108 | 107 | 105 | 127 | 81  | 100 | 96  |
| 100 | 107 | 94  | 82  | 112 | 143 | 83  | 71  | 141 | 142 | 89  | 117 | 116 | 112 | 93  | 132 | 102 | 81  | 90  |
| 96  | 92  | 101 | 82  | 96  | 115 | 112 | 106 | 131 | 125 | 75  | 95  | 114 | 82  | 94  | 111 | 82  | 85  | 104 |
| 107 | 98  | 81  | 82  | 83  | 123 | 100 | 64  | 128 | 132 | 95  | 95  | 104 | 89  | 97  | 127 | 90  | 93  | 88  |
| 85  | 75  | 79  | 91  | 89  | 114 | 106 | 95  | 113 | 127 | 103 | 95  | 97  | 90  | 97  | 115 | 86  | 103 | 96  |
| 92  | 103 | 92  | 84  | 90  | 128 | 105 | 98  | 136 | 132 | 81  | 105 | 117 | 100 | 97  | 116 | 92  | 79  | 94  |
| 106 | 84  | 92  | 91  | 87  | 114 | 107 | 90  | 129 | 127 | 96  | 92  | 103 | 89  | 97  | 112 | 97  | 94  | 107 |
| 109 | 93  | 88  | 90  | 87  | 136 | 101 | 62  | 127 | 128 | 105 | 106 | 108 | 103 | 87  | 128 | 96  | 89  | 84  |
| 107 | 98  | 81  | 82  | 83  | 123 | 100 | 64  | 128 | 132 | 95  | 95  | 104 | 89  | 97  | 127 | 90  | 93  | 88  |
| 123 | 130 | 126 | 125 | 115 | 101 | 116 | 134 | 117 | 116 | 119 | 119 | 139 | 126 | 136 | 102 | 130 | 117 | 129 |
| 141 | 128 | 138 | 122 | 120 | 98  | 136 | 131 | 109 | 92  | 131 | 136 | 141 | 129 | 136 | 104 | 142 | 127 | 140 |
| 90  | 104 | 108 | 93  | 93  | 104 | 112 | 122 | 126 | 115 | 86  | 90  | 113 | 90  | 112 | 105 | 93  | 102 | 111 |
| 89  | 84  | 85  | 82  | 107 | 130 | 101 | 97  | 140 | 148 | 91  | 90  | 94  | 96  | 98  | 122 | 84  | 102 | 74  |
| 126 | 109 | 131 | 124 | 121 | 117 | 131 | 136 | 113 | 122 | 119 | 121 | 126 | 115 | 128 | 106 | 123 | 132 | 142 |
| 89  | 94  | 90  | 88  | 96  | 120 | 86  | 99  | 118 | 124 | 88  | 103 | 111 | 99  | 102 | 121 | 88  | 102 | 95  |
| 51  | 72  | 80  | 99  | 84  | 124 | 96  | 99  | 126 | 126 | 76  | 77  | 91  | 100 | 72  | 114 | 55  | 100 | 77  |
| 87  | 81  | 86  | 79  | 93  | 124 | 87  | 88  | 125 | 129 | 84  | 93  | 93  | 85  | 85  | 119 | 76  | 104 | 90  |
| 107 | 100 | 113 | 95  | 124 | 129 | 100 | 99  | 136 | 140 | 107 | 121 | 109 | 117 | 118 | 124 | 114 | 119 | 101 |
| 124 | 113 | 128 | 127 | 119 | 100 | 122 | 122 | 101 | 88  | 119 | 128 | 127 | 121 | 123 | 96  | 123 | 121 | 143 |
| 85  | 88  | 76  | 80  | 98  | 137 | 97  | 76  | 131 | 136 | 86  | 93  | 100 | 92  | 77  | 130 | 80  | 82  | 75  |
| 97  | 88  | 67  | 90  | 83  | 120 | 90  | 77  | 123 | 132 | 93  | 90  | 99  | 93  | 67  | 126 | 86  | 84  | 88  |
| 93  | 96  | 92  | 70  | 91  | 121 | 100 | 109 | 131 | 129 | 82  | 97  | 113 | 99  | 115 | 116 | 89  | 89  | 104 |
| 148 | 147 | 148 | 144 | 144 | 141 | 150 | 143 | 118 | 124 | 146 | 150 | 138 | 144 | 147 | 139 | 147 | 152 | 145 |
| 73  | 70  | 75  | 89  | 86  | 134 | 88  | 92  | 134 | 134 | 85  | 81  | 88  | 92  | 76  | 120 | 59  | 95  | 80  |
| 55  | 91  | 87  | 101 | 88  | 118 | 103 | 108 | 126 | 125 | 83  | 80  | 104 | 106 | 88  | 103 | 61  | 93  | 85  |
| 61  | 69  | 87  | 108 | 91  | 118 | 97  | 105 | 126 | 126 | 90  | 79  | 98  | 103 | 86  | 108 | 76  | 96  | 103 |

|     |     |     |     |     |     |     |     |     |     |     |     |     |     |     |     |     |     |     |
|-----|-----|-----|-----|-----|-----|-----|-----|-----|-----|-----|-----|-----|-----|-----|-----|-----|-----|-----|
| 98  | 100 | 96  | 87  | 106 | 115 | 105 | 100 | 130 | 125 | 105 | 114 | 115 | 108 | 101 | 125 | 94  | 101 | 108 |
| 92  | 70  | 72  | 80  | 58  | 118 | 105 | 108 | 129 | 127 | 93  | 55  | 101 | 91  | 97  | 117 | 82  | 79  | 93  |
| 95  | 97  | 93  | 91  | 122 | 135 | 76  | 91  | 142 | 142 | 99  | 100 | 108 | 110 | 112 | 122 | 102 | 100 | 86  |
| 83  | 88  | 84  | 69  | 100 | 128 | 99  | 86  | 131 | 136 | 94  | 93  | 98  | 99  | 86  | 128 | 81  | 101 | 78  |
| 108 | 109 | 96  | 89  | 91  | 127 | 94  | 93  | 136 | 132 | 93  | 99  | 100 | 101 | 90  | 118 | 93  | 80  | 91  |
| 88  | 93  | 84  | 85  | 92  | 132 | 88  | 86  | 139 | 135 | 80  | 100 | 107 | 102 | 72  | 114 | 81  | 85  | 106 |
| 138 | 121 | 126 | 123 | 117 | 109 | 126 | 125 | 122 | 115 | 126 | 130 | 129 | 120 | 121 | 104 | 123 | 130 | 128 |
| 86  | 75  | 75  | 78  | 84  | 119 | 99  | 104 | 124 | 122 | 90  | 89  | 102 | 85  | 91  | 120 | 78  | 86  | 95  |
| 77  | 86  | 83  | 49  | 89  | 127 | 94  | 82  | 122 | 130 | 87  | 91  | 110 | 87  | 94  | 114 | 82  | 70  | 90  |
| 98  | 114 | 117 | 122 | 124 | 110 | 113 | 123 | 120 | 106 | 104 | 119 | 121 | 128 | 115 | 104 | 113 | 119 | 119 |
| 71  | 66  | 76  | 108 | 103 | 110 | 96  | 96  | 123 | 128 | 90  | 82  | 86  | 90  | 80  | 100 | 73  | 110 | 99  |
| 88  | 80  | 81  | 83  | 81  | 130 | 90  | 100 | 133 | 133 | 93  | 82  | 103 | 94  | 86  | 136 | 85  | 83  | 83  |
| 94  | 85  | 89  | 86  | 107 | 132 | 83  | 87  | 141 | 141 | 86  | 106 | 95  | 93  | 95  | 124 | 87  | 103 | 76  |
| 101 | 80  | 85  | 80  | 87  | 116 | 108 | 102 | 126 | 130 | 98  | 101 | 97  | 91  | 91  | 115 | 86  | 100 | 93  |
| 91  | 85  | 86  | 85  | 102 | 124 | 105 | 105 | 133 | 133 | 87  | 85  | 106 | 99  | 97  | 124 | 92  | 104 | 84  |
| 97  | 96  | 97  | 115 | 105 | 121 | 112 | 109 | 122 | 126 | 107 | 107 | 103 | 109 | 97  | 101 | 98  | 124 | 114 |
| 96  | 85  | 86  | 83  | 94  | 126 | 92  | 77  | 134 | 134 | 96  | 101 | 101 | 96  | 67  | 120 | 87  | 86  | 87  |
| 66  | 81  | 85  | 83  | 104 | 127 | 89  | 103 | 132 | 132 | 78  | 93  | 112 | 104 | 104 | 115 | 82  | 80  | 93  |
| 142 | 134 | 150 | 137 | 147 | 119 | 144 | 144 | 120 | 115 | 140 | 144 | 143 | 147 | 146 | 131 | 150 | 145 | 146 |
| 91  | 93  | 104 | 109 | 109 | 122 | 92  | 110 | 140 | 131 | 92  | 99  | 100 | 103 | 94  | 109 | 75  | 116 | 97  |
| 79  | 93  | 86  | 59  | 85  | 131 | 97  | 92  | 130 | 133 | 67  | 90  | 113 | 84  | 98  | 118 | 74  | 68  | 83  |
| 78  | 89  | 93  | 95  | 99  | 124 | 102 | 104 | 134 | 135 | 89  | 91  | 107 | 109 | 114 | 114 | 95  | 104 | 109 |
| 92  | 99  | 80  | 84  | 102 | 143 | 93  | 90  | 136 | 138 | 82  | 101 | 110 | 111 | 103 | 135 | 88  | 91  | 86  |
| 97  | 85  | 77  | 82  | 96  | 133 | 106 | 91  | 137 | 133 | 100 | 90  | 101 | 97  | 84  | 132 | 82  | 101 | 93  |
| 98  | 100 | 88  | 84  | 93  | 128 | 108 | 100 | 132 | 133 | 102 | 107 | 115 | 99  | 95  | 120 | 94  | 101 | 95  |
| 83  | 89  | 84  | 107 | 86  | 129 | 82  | 91  | 138 | 139 | 91  | 80  | 105 | 114 | 94  | 126 | 76  | 87  | 82  |
| 97  | 100 | 100 | 98  | 92  | 118 | 104 | 109 | 128 | 129 | 94  | 103 | 109 | 104 | 105 | 115 | 94  | 95  | 106 |
| 76  | 89  | 80  | 85  | 113 | 132 | 89  | 90  | 131 | 139 | 87  | 92  | 98  | 105 | 98  | 124 | 76  | 97  | 70  |
| 89  | 72  | 88  | 89  | 88  | 116 | 96  | 105 | 126 | 120 | 88  | 90  | 98  | 77  | 88  | 114 | 65  | 92  | 88  |
| 94  | 103 | 89  | 70  | 90  | 123 | 97  | 93  | 129 | 128 | 85  | 95  | 107 | 94  | 94  | 111 | 79  | 90  | 92  |
| 86  | 100 | 90  | 103 | 102 | 128 | 92  | 101 | 139 | 140 | 92  | 103 | 110 | 114 | 105 | 125 | 79  | 101 | 76  |
| 93  | 94  | 81  | 83  | 102 | 123 | 91  | 77  | 137 | 126 | 83  | 91  | 100 | 99  | 97  | 117 | 86  | 87  | 80  |
| 76  | 87  | 92  | 89  | 81  | 129 | 94  | 93  | 138 | 138 | 78  | 89  | 107 | 108 | 96  | 118 | 74  | 83  | 82  |
| 88  | 108 | 99  | 90  | 110 | 124 | 99  | 100 | 130 | 127 | 84  | 112 | 112 | 114 | 120 | 116 | 100 | 93  | 99  |
| 100 | 88  | 97  | 102 | 81  | 107 | 109 | 110 | 126 | 123 | 96  | 96  | 111 | 94  | 101 | 121 | 79  | 101 | 97  |
| 103 | 84  | 85  | 96  | 89  | 111 | 105 | 100 | 126 | 123 | 96  | 96  | 110 | 91  | 103 | 119 | 92  | 95  | 111 |
| 110 | 90  | 91  | 83  | 75  | 116 | 96  | 105 | 125 | 123 | 89  | 97  | 97  | 85  | 98  | 117 | 93  | 87  | 93  |
| 90  | 71  | 97  | 94  | 99  | 117 | 90  | 84  | 131 | 133 | 83  | 96  | 98  | 84  | 76  | 106 | 72  | 106 | 89  |
| 102 | 104 | 103 | 93  | 94  | 136 | 92  | 99  | 138 | 127 | 86  | 100 | 111 | 105 | 105 | 108 | 108 | 93  | 106 |
| 86  | 84  | 83  | 84  | 100 | 121 | 92  | 93  | 126 | 134 | 94  | 93  | 105 | 111 | 99  | 126 | 92  | 93  | 77  |
| 96  | 100 | 100 | 109 | 110 | 136 | 94  | 95  | 143 | 140 | 92  | 111 | 112 | 111 | 93  | 129 | 81  | 95  | 83  |
| 91  | 88  | 83  | 92  | 91  | 122 | 80  | 100 | 122 | 126 | 91  | 95  | 102 | 92  | 91  | 116 | 90  | 107 | 90  |
| 101 | 91  | 95  | 88  | 102 | 116 | 95  | 92  | 132 | 127 | 88  | 99  | 100 | 92  | 94  | 115 | 91  | 109 | 87  |
| 102 | 99  | 88  | 93  | 103 | 126 | 108 | 90  | 135 | 135 | 107 | 97  | 112 | 113 | 106 | 126 | 103 | 96  | 83  |
| 78  | 72  | 80  | 96  | 79  | 119 | 78  | 91  | 129 | 128 | 85  | 75  | 84  | 97  | 89  | 116 | 85  | 95  | 89  |
| 76  | 82  | 89  | 88  | 88  | 131 | 95  | 94  | 140 | 133 | 70  | 79  | 91  | 91  | 88  | 122 | 48  | 87  | 77  |
| 76  | 77  | 91  | 91  | 88  | 127 | 71  | 89  | 135 | 137 | 77  | 83  | 103 | 109 | 93  | 109 | 72  | 84  | 92  |
| 92  | 76  | 79  | 84  | 76  | 125 | 97  | 89  | 134 | 138 | 90  | 80  | 94  | 98  | 75  | 127 | 72  | 103 | 70  |
| 117 | 95  | 103 | 112 | 85  | 102 | 115 | 120 | 106 | 102 | 111 | 101 | 108 | 112 | 115 | 119 | 119 | 102 | 119 |
| 103 | 86  | 87  | 99  | 86  | 104 | 105 | 112 | 113 | 104 | 94  | 93  | 112 | 81  | 102 | 107 | 88  | 90  | 115 |
| 86  | 85  | 75  | 80  | 95  | 129 | 94  | 103 | 129 | 136 | 97  | 87  | 93  | 91  | 97  | 128 | 80  | 96  | 74  |
| 95  | 101 | 87  | 95  | 84  | 117 | 107 | 120 | 124 | 119 | 81  | 96  | 121 | 98  | 100 | 110 | 84  | 78  | 105 |
| 84  | 80  | 85  | 81  | 95  | 137 | 88  | 88  | 136 | 136 | 80  | 101 | 98  | 91  | 87  | 120 | 83  | 91  | 86  |
| 127 | 115 | 106 | 109 | 104 | 120 | 122 | 117 | 126 | 119 | 119 | 103 | 114 | 99  | 114 | 118 | 121 | 107 | 117 |
| 124 | 117 | 112 | 118 | 98  | 127 | 109 | 106 | 128 | 121 | 102 | 113 | 109 | 96  | 110 | 116 | 105 | 108 | 126 |
| 114 | 106 | 109 | 111 | 100 | 123 | 115 | 99  | 120 | 117 | 105 | 109 | 113 | 100 | 103 | 110 | 111 | 107 | 126 |
| 112 | 114 | 101 | 90  | 103 | 130 | 116 | 96  | 130 | 131 | 109 | 101 | 115 | 108 | 104 | 126 | 104 | 93  | 107 |
| 101 | 98  | 87  | 107 | 97  | 130 | 85  | 84  | 137 | 130 | 90  | 111 | 104 | 89  | 98  | 116 | 88  | 100 | 89  |
| 110 | 98  | 103 | 96  | 83  | 117 | 101 | 111 | 131 | 124 | 99  | 98  | 102 | 100 | 100 | 111 | 96  | 103 | 103 |
| 89  | 93  | 105 | 92  | 95  | 99  | 115 | 112 | 119 | 112 | 92  | 102 | 107 | 102 | 111 | 111 | 91  | 107 | 107 |
| 116 | 106 | 113 | 105 | 114 | 119 | 129 | 112 | 121 | 114 | 115 | 110 | 122 | 97  | 113 | 113 | 96  | 106 | 126 |
| 106 | 106 | 100 | 110 | 110 | 114 | 114 | 116 | 115 | 112 | 111 | 102 | 106 | 109 | 110 | 115 | 104 | 116 | 114 |
| 111 | 113 | 93  | 98  | 104 | 135 | 101 | 87  | 129 | 130 | 103 | 102 | 114 | 113 | 100 | 129 | 100 | 92  | 103 |
| 138 | 127 | 142 | 131 | 132 | 97  | 134 | 124 | 102 | 94  | 131 | 140 | 137 | 137 | 133 | 100 | 137 | 139 | 143 |
| 110 | 94  | 96  | 92  | 85  | 114 | 110 | 101 | 114 | 104 | 96  | 99  | 102 | 92  | 104 | 110 | 97  | 94  | 118 |
| 100 | 81  | 100 | 77  | 91  | 114 | 97  | 98  | 128 | 128 | 91  | 93  | 100 | 100 | 97  | 112 | 96  | 96  | 93  |
| 84  | 81  | 85  | 83  | 84  | 110 | 96  | 115 | 123 | 126 | 95  | 75  | 104 | 88  | 108 | 101 | 94  | 81  | 102 |
| 101 | 88  | 89  | 98  | 107 | 129 | 88  | 95  | 136 | 137 | 86  | 106 | 93  | 93  | 94  | 125 | 85  | 112 | 88  |
| 103 | 85  | 84  | 87  | 99  | 128 | 89  | 108 | 136 | 136 | 93  | 93  | 101 | 94  | 104 | 128 | 97  | 104 | 86  |
| 0   | 75  | 75  | 88  | 102 | 128 | 96  | 106 | 128 | 132 | 75  | 77  | 102 | 107 | 91  | 109 | 66  | 89  | 87  |
| 75  | 0   | 70  | 84  | 87  | 118 | 92  | 99  | 125 | 130 | 88  | 61  | 89  | 89  | 89  | 118 | 68  | 97  | 93  |
| 75  | 70  | 0   | 77  | 75  | 128 | 96  | 92  | 128 | 136 | 92  | 67  | 91  | 99  | 87  | 127 | 72  | 78  | 72  |
| 88  | 84  | 77  | 0   | 88  | 126 | 97  | 79  | 131 | 131 | 86  | 92  | 107 | 92  | 95  | 123 | 87  | 77  | 82  |
| 102 | 87  | 75  | 88  | 0   | 115 | 105 | 94  | 130 | 125 | 91  | 68  | 106 | 98  | 88  | 116 | 85  | 76  | 90  |
| 128 | 118 | 128 | 126 | 115 | 0   | 134 | 133 | 77  | 72  | 127 | 115 | 115 | 121 | 131 | 82  | 136 | 130 | 135 |

|     |     |     |     |     |     |     |     |     |     |     |     |     |     |     |     |     |     |     |
|-----|-----|-----|-----|-----|-----|-----|-----|-----|-----|-----|-----|-----|-----|-----|-----|-----|-----|-----|
| 96  | 92  | 96  | 97  | 105 | 134 | 0   | 90  | 137 | 129 | 73  | 98  | 106 | 100 | 101 | 122 | 82  | 84  | 82  |
| 106 | 99  | 92  | 79  | 94  | 133 | 0   | 133 | 131 | 89  | 111 | 104 | 101 | 83  | 128 | 94  | 91  | 88  |     |
| 128 | 125 | 128 | 131 | 130 | 77  | 137 | 133 | 0   | 64  | 133 | 132 | 119 | 123 | 125 | 110 | 136 | 129 | 144 |
| 132 | 130 | 136 | 131 | 125 | 72  | 129 | 131 | 64  | 0   | 127 | 132 | 126 | 126 | 134 | 95  | 138 | 122 | 148 |
| 75  | 88  | 92  | 86  | 91  | 127 | 73  | 89  | 133 | 127 | 0   | 87  | 107 | 84  | 94  | 115 | 59  | 74  | 103 |
| 77  | 61  | 67  | 92  | 68  | 115 | 98  | 111 | 132 | 132 | 87  | 0   | 92  | 97  | 98  | 123 | 75  | 91  | 86  |
| 102 | 89  | 91  | 107 | 106 | 115 | 106 | 104 | 119 | 126 | 107 | 92  | 0   | 106 | 96  | 121 | 92  | 125 | 92  |
| 107 | 89  | 99  | 92  | 98  | 121 | 100 | 101 | 123 | 126 | 84  | 97  | 106 | 0   | 108 | 114 | 80  | 99  | 113 |
| 91  | 89  | 87  | 95  | 88  | 131 | 101 | 83  | 125 | 134 | 94  | 98  | 98  | 108 | 0   | 123 | 70  | 100 | 86  |
| 109 | 118 | 127 | 123 | 116 | 82  | 122 | 128 | 110 | 95  | 115 | 123 | 121 | 114 | 123 | 0   | 120 | 120 | 140 |
| 66  | 68  | 72  | 87  | 85  | 136 | 82  | 94  | 136 | 138 | 59  | 75  | 92  | 80  | 70  | 120 | 0   | 83  | 78  |
| 89  | 97  | 78  | 77  | 76  | 130 | 84  | 91  | 129 | 122 | 74  | 91  | 125 | 99  | 100 | 120 | 83  | 0   | 90  |
| 87  | 93  | 72  | 82  | 90  | 135 | 82  | 88  | 144 | 148 | 103 | 86  | 92  | 113 | 86  | 140 | 78  | 90  | 0   |
