# Supplementary material for: Hybrid Origins of Citrus Varieties Inferred from DNA Marker Analysis of Nuclear and Organelle Genomes
Source: PubMed Central journal article supplement (PMC5130255; doi:10.1371/journal.pone.0166969), 2016-11-30
Supplement: pone.0166969.s010.pdf [file pone.0166969.s010.pdf]

**S7 Table. Summary of the Hardy-Weinberg equilibrium test of the 169 certified DNA markers with the 101 native varieties.**

| Locus | Marker   | Rep <sup>1)</sup> | p-value | Rejected <sup>2)</sup> |
|-------|----------|-------------------|---------|------------------------|
| 1     | CTVR01   | *                 | 0.1924  |                        |
| 4     | CUBER410 | *                 | 0.5478  |                        |
| 8     | CUBER918 | *                 | 0.1062  |                        |
| 9     | CUBER920 | *                 | 0.6338  |                        |
| 12    | CUBER939 | *                 | 0.0805  |                        |
| 13    | CUBER951 | *                 | 0.0684  |                        |
| 14    | GRW2011  | *                 | 0.3408  |                        |
| 17    | GRW3011  | *                 | 0.3135  |                        |
| 18    | GSR10S09 | *                 | 0.2013  |                        |
| 19    | GSR10S17 | *                 | 0.0056  | X                      |
| 20    | GSR10S29 | *                 | 0.8076  |                        |
| 28    | GSR3121  | *                 | 0.2444  |                        |
| 30    | GSR3128  | *                 | 0.0059  | X                      |
| 31    | GSR3136  | *                 | 0.0406  | X                      |
| 33    | GSR3138  | *                 | 0.0033  | X                      |
| 34    | GSR3140  | *                 | 0.1780  |                        |
| 42    | GSR6101  | *                 | 0.7697  |                        |
| 43    | GSR6122  | *                 | 0.0020  | X                      |
| 44    | GSR6129  | *                 | 0.5084  |                        |
| 45    | GSR6133  | *                 | 0.4673  |                        |
| 46    | GSR6135  | *                 | 0.0036  | X                      |
| 48    | NSX23    | *                 | 0.0959  |                        |
| 49    | NSX32    | *                 | 0.0169  | X                      |
| 51    | NSX38    | *                 | 0.5999  |                        |
| 52    | NSX39    | *                 | 0.6486  |                        |
| 53    | NSX43    | *                 | 0.3691  |                        |
| 58    | NSX82    | *                 | 0.0250  | X                      |
| 59    | NSX84    | *                 | 0.0961  |                        |
| 60    | NSX115   | *                 | 1.0000  |                        |
| 62    | NSX121   | *                 | 0.0012  | X                      |
| 63    | NSX132   | *                 | 0.6547  |                        |
| 64    | NSX137   | *                 | 0.4597  |                        |
| 65    | NSX141   | *                 | 0.6636  |                        |
| 66    | NSX145   | *                 | 0.2653  |                        |
| 67    | NSX150   | *                 | 0.7538  |                        |
| 68    | NSX153   | *                 | 0.3748  |                        |
| 69    | NSX156   | *                 | 0.5377  |                        |
| 70    | NSX160   | *                 | 0.4633  |                        |
| 71    | NSX162   | *                 | 0.3644  |                        |
| 72    | NSX165   | *                 | 0.0056  | X                      |
| 73    | NSX169   | *                 | 0.1483  |                        |
| 74    | NSX170   | *                 | 0.4661  |                        |
| 77    | NSX187   | *                 | 1.0000  |                        |
| 78    | SRPE02   | *                 | 0.0029  | X                      |
| 80    | SRPE05   | *                 | 0.7385  |                        |
| 81    | TSRA101  | *                 | 0.0002  | X                      |
| 82    | TSRA103  | *                 | 0.0055  | X                      |
| 86    | TSRA110  | *                 | 0.0450  | X                      |
| 87    | TSRA117  | *                 | 0.0040  | X                      |
| 89    | TSGR264  | *                 | 0.0558  |                        |
| 91    | TSGR271  | *                 | 0.4698  |                        |
| 96    | NSX70    | *                 | 0.7366  |                        |
| 99    | NSX118   | *                 | 0.3334  |                        |

|     |          |   |        |   |
|-----|----------|---|--------|---|
| 102 | NSX161   | * | 0.0098 | X |
| 105 | SSR07A05 | * | 0.1783 |   |
| 106 | SSR07A07 | * | 0.0158 | X |
| 107 | SSR07A14 | * | 0.2306 |   |
| 109 | SSR07A19 | * | 0.8423 |   |
| 110 | SSR07A23 | * | 0.0369 | X |
| 111 | SSR07A24 | * | 0.0758 |   |
| 112 | SSR07A20 | * | 0.2663 |   |
| 113 | SSR07B01 | * | 0.0646 |   |
| 115 | SSR07B08 | * | 0.0707 |   |
| 117 | SSR07B14 | * | 0.8334 |   |
| 118 | SSR07B27 | * | 0.9399 |   |
| 121 | SSR08A02 | * | 1.0000 |   |
| 122 | SSR08A06 | * | 0.9102 |   |
| 124 | SSR08A09 | * | 0.0920 |   |
| 126 | SSR08A15 | * | 0.4627 |   |
| 127 | SSR08A16 | * | 0.4642 |   |
| 129 | SSR08B06 | * | 0.3170 |   |
| 131 | SSR08B15 | * | 0.3530 |   |
| 132 | SSR08B20 | * | 0.0236 | X |
| 136 | SSR08B27 | * | 0.0899 |   |
| 137 | SSR08B28 | * | 0.1318 |   |
| 138 | SSR08B29 | * | 0.7619 |   |
| 140 | SSR08B32 | * | 0.8080 |   |
| 147 | SSR08B60 | * | 0.0055 | X |
| 148 | SSR08B62 | * | 0.9550 |   |
| 150 | SSR08B66 | * | 0.5442 |   |
| 151 | SSR08B68 | * | 1.0000 |   |
| 152 | SSR08B75 | * | 0.0145 | X |
| 153 | SSR08B78 | * | 0.1003 |   |
| 155 | SSR08B84 | * | 0.3386 |   |
| 156 | SSR08B85 | * | 0.0829 |   |
| 157 | SSR08B88 | * | 0.6318 |   |
| 158 | SSR08B90 | * | 0.2737 |   |
| 159 | SSR08B92 | * | 0.0211 | X |
| 160 | SSR08B95 | * | 0.4630 |   |
| 161 | SSR11A06 | * | 0.0112 | X |
| 163 | SSR11A27 | * | 0.8417 |   |
| 165 | TSGR904  | * | 0.8246 |   |
| 166 | TSGR905  | * | 0.2106 |   |
| 168 | TSR8EM15 | * | 1.0000 |   |
| 169 | TSR8EM24 | * | 0.7802 |   |
| 172 | TSRB09   | * | 0.9581 |   |
| 173 | TSRB11   | * | 0.6065 |   |
| 174 | TSRB29   | * | 0.1511 |   |
| 175 | TSRB38   | * | 0.6662 |   |
| 176 | TSRB39   | * | 0.0166 | X |
| 177 | TSRF101  | * | 0.3102 |   |
| 178 | TSRF105  | * | 0.6936 |   |
| 179 | TSRF116  | * | 0.6843 |   |
| 181 | TSRF124  | * | 0.2832 |   |
| 182 | TSRF136  | * | 0.1033 |   |
| 183 | TSRF138  | * | 0.1049 |   |
| 184 | TSRF144  | * | 0.0962 |   |
| 185 | TSRF157  | * | 0.6078 |   |
| 186 | TSRF160  | * | 0.4292 |   |
| 187 | TSRF161  | * | 0.1545 |   |

|     |          |    |        |   |
|-----|----------|----|--------|---|
| 188 | TSRF162  | *  | 0.0849 |   |
| 189 | TSRF164  | *  | 0.6574 |   |
| 190 | TSRF167  | *  | 0.1020 |   |
| 191 | TSRF169  | *  | 0.1853 |   |
| 193 | TSRF184  | *  | 0.3629 |   |
| 194 | TSRF187  | *  | 0.5498 |   |
| 196 | TSRF192  | *  | 0.0044 | X |
| 197 | TSRF194  | *  | 0.5335 |   |
| 198 | TSRF195  | *  | 0.9217 |   |
| 199 | TSRF198  | *  | 1.0000 |   |
| 200 | TSRF204  | *  | 0.8862 |   |
| 201 | TSRF208  | *  | 1.0000 |   |
| 202 | TSRF211  | *  | 0.7136 |   |
| 203 | TSRF215  | *  | 0.5219 |   |
| 204 | TSRF218  | *  | 0.8829 |   |
| 206 | TSRF225  | *  | 1.0000 |   |
| 207 | TSRF229  | *  | 0.1847 |   |
| 208 | TSRF230  | *  | 0.8097 |   |
| 210 | TSRF237  | *  | 0.1306 |   |
| 212 | TSRN214  | *  | 0.1480 |   |
| 213 | TSRP06   | *  | 0.2896 |   |
| 214 | TSRP07   | *  | 0.8204 |   |
| 215 | CiBE0246 | *  | 0.3727 |   |
| 216 | CiBE0447 | *  | 0.0009 | X |
| 217 | CiBE1644 | *  | 0.0017 | X |
| 218 | CiBE2165 | *  | 0.1088 |   |
| 219 | CiBE2227 | *  | 0.0000 | X |
| 220 | CiBE4265 | *  | 0.3240 |   |
| 221 | CX0004   | *  | 0.2501 |   |
| 223 | CX0035   | *  | 0.4254 |   |
| 224 | CX2004   | *  | 0.5538 |   |
| 227 | CX2040   | *  | 0.1184 |   |
| 228 | CX3001   | *  | 0.1008 |   |
| 230 | CX4005   | *  | 0.5349 |   |
| 235 | CX5039   | *  | 0.3589 |   |
| 236 | CX6024   | *  | 0.1262 |   |
| 237 | CX6035   | *  | 0.7129 |   |
| 238 | CX6037   | *  | 0.5764 |   |
| 239 | CX6F21   | *  | 0.1110 |   |
| 241 | F02      | *  | 0.0327 | X |
| 245 | F40      | *  | 0.3108 |   |
| 246 | F50      | *  | 0.0347 | X |
| 247 | F79      | *  | 0.2699 |   |
| 2   | CTVR04   | ** | 0.1902 |   |
| 6   | CUBER602 | ** | 0.0677 |   |
| 11  | CUBER935 | ** | 0.5688 |   |
| 90  | TSGR265  | ** | 0.8227 |   |
| 133 | SSR08B21 | ** | 0.8939 |   |
| 135 | SSR08B25 | ** | 0.0247 | X |
| 141 | SSR08B35 | ** | 0.0963 |   |
| 143 | SSR08B40 | ** | 0.1220 |   |
| 146 | SSR08B54 | ** | 0.0926 |   |
| 164 | TSGR901  | ** | 0.3131 |   |
| 195 | TSRF191  | ** | 0.5219 |   |
| 205 | TSRF206  | ** | 0.1547 |   |
| 209 | TSRF234  | ** | 0.8105 |   |
| 234 | CX5022   | ** | 0.0801 |   |

|     |     |     |        |     |
|-----|-----|-----|--------|-----|
| 242 | F03 | **  | 0.9551 |     |
| 243 | F16 | **  | 0.4321 |     |
|     |     | 169 | 31     | 138 |

HWE test for multi allelic data was evaluated by MCMC method (Guo and Thompson, 1994?) that is implemented on Arlequin (ver. 3.5).

The test was conducted 10 times, then any DNA markers that showed  $p$ -value smaller than 0.05 were rejected from the following structure analysis.

- 1) Representative markers (see Table xx).
- 2) "x" indicates the rejected markers by  $p < .05$ .
