# Supplementary material for: Hybrid Origins of Citrus Varieties Inferred from DNA Marker Analysis of Nuclear and Organelle Genomes
Source: PubMed Central journal article supplement (PMC5130255; doi:10.1371/journal.pone.0166969), 2016-11-30
Supplement: pone.0166969.s011.pdf [file pone.0166969.s011.pdf]

**S8 Table. Inferred admixture population (Q) of 101 native citrus varieties for a K = 3 population model**

| ID   | Variety name         | Pummelo              | Citron   | Mandarin   |
|------|----------------------|----------------------|----------|------------|
|      |                      | Inferred populations |          |            |
|      |                      | P1                   | P2       | P3         |
|      |                      | (pummelo)            | (citron) | (mandarin) |
| A110 | Pummelo whitetype    | 0.9960               | 0.0020   | 0.0020     |
| A196 | Uchimurasaki         | 0.9960               | 0.0020   | 0.0020     |
| A032 | Hirado buntan        | 0.9950               | 0.0020   | 0.0030     |
| A004 | Banpeiyu             | 0.9940               | 0.0030   | 0.0030     |
| A018 | Egami buntan         | 0.9930               | 0.0040   | 0.0030     |
| A145 | Suisho buntan        | 0.9850               | 0.0060   | 0.0090     |
| A088 | Mato buntan          | 0.9657               | 0.0293   | 0.0050     |
| A191 | Tosa buntan          | 0.8949               | 0.0242   | 0.0809     |
| A002 | Anseikan             | 0.8798               | 0.0110   | 0.1092     |
| A027 | Hanayu               | 0.0020               | 0.9900   | 0.0080     |
| A208 | Yuzu                 | 0.0040               | 0.9888   | 0.0072     |
| A089 | Mexican lime         | 0.0260               | 0.9710   | 0.0030     |
| A041 | Ichanchii            | 0.1083               | 0.8857   | 0.0060     |
| A079 | Kourai Tachibana     | 0.0030               | 0.8456   | 0.1514     |
| A085 | Lemon                | 0.1539               | 0.8329   | 0.0132     |
| A087 | Limonia              | 0.0070               | 0.8137   | 0.1793     |
| A111 | Rokugatsumikan       | 0.0931               | 0.8099   | 0.0970     |
| A042 | Ichang lemon         | 0.3903               | 0.6057   | 0.0040     |
| A006 | Bergamot             | 0.3430               | 0.6319   | 0.0251     |
| A053 | Kikudaidai           | 0.3611               | 0.5993   | 0.0396     |
| A015 | Dada                 | 0.4270               | 0.4479   | 0.1252     |
| A046 | Jabon                | 0.3390               | 0.5102   | 0.1508     |
| A036 | Hyuganatsu           | 0.3711               | 0.4090   | 0.2199     |
| A090 | Meyer lemon          | 0.0975               | 0.6821   | 0.2203     |
| A086 | Lemonade             | 0.2180               | 0.5499   | 0.2321     |
| A049 | Kaikoukan            | 0.7555               | 0.0040   | 0.2405     |
| A045 | Jabara               | 0.2050               | 0.5510   | 0.2440     |
| A198 | Unzoki               | 0.2240               | 0.5042   | 0.2718     |
| A082 | Kunenbo              | 0.0350               | 0.6736   | 0.2914     |
| A033 | Hiroshimanatsubuntan | 0.6491               | 0.0555   | 0.2954     |
| A144 | Sudachi              | 0.0070               | 0.6941   | 0.2989     |
| A051 | Kawachi bankan       | 0.6940               | 0.0050   | 0.3010     |
| A175 | Tachibana            | 0.0020               | 0.6876   | 0.3104     |
| A048 | Kabuchi              | 0.1930               | 0.4958   | 0.3112     |
| A172 | Tachibana            | 0.0020               | 0.6730   | 0.3250     |
| A047 | Kabosu               | 0.0940               | 0.5789   | 0.3271     |
| A141 | Sour orange          | 0.4132               | 0.2445   | 0.3422     |
| A073 | Kizu                 | 0.1120               | 0.5415   | 0.3465     |
| A091 | Mochiyu              | 0.1490               | 0.5018   | 0.3492     |
| A055 | Kinkoji              | 0.6383               | 0.0040   | 0.3577     |
| A024 | Grapefruit           | 0.6276               | 0.0040   | 0.3684     |
| A028 | Hassaku              | 0.6256               | 0.0030   | 0.3714     |
| A199 | USSR Tangelo         | 0.6143               | 0.0053   | 0.3804     |
| A023 | Girimikan            | 0.0191               | 0.5983   | 0.3826     |
| A205 | Yuge hyoukan         | 0.6020               | 0.0050   | 0.3930     |
| A174 | Tachibana            | 0.0020               | 0.5984   | 0.3996     |
| A003 | Asahikan             | 0.5938               | 0.0040   | 0.4022     |
| A136 | Shiikuwasha          | 0.0030               | 0.5832   | 0.4138     |
| A035 | Hyoukan              | 0.5715               | 0.0040   | 0.4245     |
| A192 | Twukkuni             | 0.0301               | 0.5427   | 0.4272     |
| A203 | Yamamikan            | 0.5597               | 0.0040   | 0.4363     |
| A076 | Koji                 | 0.0313               | 0.5266   | 0.4421     |
| A135 | Shiikuwasha          | 0.0020               | 0.5551   | 0.4429     |
| A030 | Henka mikan          | 0.0370               | 0.5113   | 0.4517     |
| A101 | Ogonkan              | 0.2876               | 0.2589   | 0.4535     |
| A095 | Naruto               | 0.5300               | 0.0050   | 0.4650     |
| A202 | Yamabuki             | 0.5230               | 0.0110   | 0.4660     |

|      |                      |        |        |        |
|------|----------------------|--------|--------|--------|
| A050 | Kawabata             | 0.3293 | 0.1938 | 0.4769 |
| A134 | Satsuma Kikoku       | 0.4396 | 0.0711 | 0.4893 |
| A001 | Andoukan             | 0.4962 | 0.0040 | 0.4998 |
| A052 | Keraji               | 0.1570 | 0.3401 | 0.5029 |
| A112 | Sanbokan             | 0.4861 | 0.0068 | 0.5071 |
| A008 | Binkitsu             | 0.2164 | 0.2745 | 0.5091 |
| A207 | Yuukunibu            | 0.4830 | 0.0040 | 0.5130 |
| A098 | Natsudaikai          | 0.4670 | 0.0060 | 0.5270 |
| A103 | Ootoukan             | 0.4619 | 0.0072 | 0.5309 |
| A080 | Kotokan              | 0.4378 | 0.0200 | 0.5422 |
| A187 | Tengu                | 0.4492 | 0.0030 | 0.5478 |
| A021 | Funadoko             | 0.4300 | 0.0060 | 0.5640 |
| A137 | Shunkokan            | 0.4053 | 0.0240 | 0.5707 |
| A197 | Ujukitsu             | 0.4090 | 0.0060 | 0.5850 |
| A044 | Iyo                  | 0.4089 | 0.0030 | 0.5881 |
| A104 | Oukan                | 0.3669 | 0.0252 | 0.6079 |
| A019 | Fukure mikan         | 0.0060 | 0.3601 | 0.6339 |
| A162 | Sweet orange         | 0.3607 | 0.0050 | 0.6343 |
| A081 | Kunenbo              | 0.3542 | 0.0040 | 0.6417 |
| A147 | Suruga Yuko          | 0.0100 | 0.2996 | 0.6904 |
| A125 | Satsuma mandarin     | 0.2892 | 0.0050 | 0.7058 |
| A204 | Yatsushiro           | 0.2430 | 0.0050 | 0.7520 |
| A100 | Nidonari mikan       | 0.1580 | 0.0680 | 0.7740 |
| A186 | Temple               | 0.2220 | 0.0040 | 0.7740 |
| A054 | King mandarin        | 0.1773 | 0.0282 | 0.7945 |
| A188 | Tizon                | 0.1665 | 0.0092 | 0.8242 |
| A183 | Tankan               | 0.1130 | 0.0060 | 0.8810 |
| A014 | Cravo mandarin       | 0.1000 | 0.0040 | 0.8960 |
| A009 | Clementine           | 0.0710 | 0.0040 | 0.9250 |
| A092 | Murcott              | 0.0640 | 0.0070 | 0.9290 |
| A146 | Sunki                | 0.0020 | 0.0674 | 0.9306 |
| A109 | Ponkitsu             | 0.0350 | 0.0243 | 0.9407 |
| A013 | Cleopatra            | 0.0030 | 0.0397 | 0.9573 |
| A206 | Youpi ju (Yuhikitsu) | 0.0020 | 0.0270 | 0.9710 |
| A107 | Ponkan               | 0.0045 | 0.0140 | 0.9815 |
| A005 | Ben Di Zao           | 0.0040 | 0.0120 | 0.9840 |
| A022 | Genshokan            | 0.0030 | 0.0120 | 0.9850 |
| A031 | Hickson              | 0.0070 | 0.0060 | 0.9870 |
| A075 | Kobeni mikan         | 0.0020 | 0.0070 | 0.9910 |
| A059 | Kishu mandarin       | 0.0020 | 0.0050 | 0.9930 |
| A138 | Sokitsu              | 0.0020 | 0.0040 | 0.9940 |
| A201 | Willowleaf mandarin  | 0.0020 | 0.0040 | 0.9940 |
| A016 | Dancy                | 0.0020 | 0.0030 | 0.9950 |
| A200 | Willowleaf mandarin  | 0.0020 | 0.0030 | 0.9950 |

P1, P2 and P3: The inferred three populations that correspond to pummelo, citron, and mandarin.
