# Supplementary material for: Hybrid Origins of Citrus Varieties Inferred from DNA Marker Analysis of Nuclear and Organelle Genomes
Source: PubMed Central journal article supplement (PMC5130255; doi:10.1371/journal.pone.0166969), 2016-11-30
Supplement: pone.0166969.s012.pdf [file pone.0166969.s012.pdf]

**Table S9. Genotypes of all plant samples obtained with 11 SSR markers for organelles**

**A: indigenous varieties**

| No.  | Rep 1) | Variety              | Strain                          | Chloroplast markers |       |       |       |         |         | Mitochondria markers |          |                  | Class | Same GT | Organelar type |              |                     |
|------|--------|----------------------|---------------------------------|---------------------|-------|-------|-------|---------|---------|----------------------|----------|------------------|-------|---------|----------------|--------------|---------------------|
|      |        |                      |                                 | CSS03               | CSS04 | CSL01 | CSL09 | ccmp2.2 | ccmp6.2 | ccmp7.2              | ccmp10.2 | rrn5/<br>rrn18-1 |       |         |                | nad2/<br>4-3 | nad7/<br>1-2        |
| A001 | *      | Andoukan             |                                 | 315                 | 234   | 379   | 298   | 210     | 143     | 148                  | 130      | 274              | 269   | 172     | C04            | 67           | pummelo type        |
| A002 | *      | Anseikan             |                                 | 315                 | 234   | 379   | 298   | 210     | 143     | 148                  | 130      | 274              | 269   | 172     | C04            | 67           | pummelo type        |
| A003 | *      | Asahikan             |                                 | 315                 | 234   | 379   | 298   | 210     | 143     | 148                  | 130      | 274              | 269   | 172     | C04            | 67           | pummelo type        |
| A004 | *      | Banpeiyu             |                                 | 315                 | 234   | 379   | 298   | 210     | 143     | 148                  | 130      | 274              | 269   | 172     | C04            | 67           | pummelo type        |
| A005 | *      | Ben Di Zao           |                                 | 315                 | 235   | 372   | 303   | 210     | 141     | 148                  | 130      | 269              | 253   | 164     | C12            | 192          | Mandarin type       |
| A006 | *      | Bergamot             |                                 | 315                 | 233   | 377   | 305   | 210     | 141     | 148                  | 130      | 274              | 269   | 172     | C06            | 13           | Lemon type          |
| A007 | *      | Bendi Guangju        |                                 | 315                 | 233   | 377   | 298   | 210     | 143     | 148                  | 130      | 274              | 269   | 172     | C07            | 45           | Sweet orange type   |
| A008 | *      | Binkitsu             |                                 | 315                 | 233   | 377   | 298   | 210     | 143     | 148                  | 130      | 274              | 269   | 172     | C07            | 45           | Sweet orange type   |
| A009 | *      | Clementine           |                                 | 315                 | 235   | 372   | 303   | 210     | 141     | 148                  | 130      | 269              | 253   | 164     | C12            | 192          | Mandarin type       |
| A010 |        | Clementine           | A Peau Fin                      | 315                 | 235   | 372   | 303   | 210     | 141     | 148                  | 130      | 269              | 253   | 164     | C12            | 192          | Mandarin type       |
| A011 |        | Clementine           | Caffin                          | 315                 | 235   | 372   | 303   | 210     | 141     | 148                  | 130      | 269              | 253   | 164     | C12            | 192          | Mandarin type       |
| A012 |        | Clementine           | de Nules                        | 315                 | 235   | 372   | 303   | 210     | 141     | 148                  | 130      | 269              | 253   | 164     | C12            | 192          | Mandarin type       |
| A013 | *      | Cleopatra            |                                 | 315                 | 234   | 370   | 304   | 210     | 141     | 148                  | 130      | 269              | 261   | 164     | C17            | 1            | Cleopatra type      |
| A014 | *      | Cravo mandarin       |                                 | 315                 | 235   | 372   | 303   | 210     | 141     | 148                  | 130      | 269              | 253   | 164     | C12            | 192          | Mandarin type       |
| A015 | *      | Dada                 |                                 | 315                 | 234   | 379   | 298   | 210     | 143     | 148                  | 130      | 274              | 269   | 172     | C04            | 67           | pummelo type        |
| A016 | *      | Dancy                |                                 | 315                 | 235   | 372   | 303   | 210     | 141     | 148                  | 130      | 269              | 253   | 164     | C12            | 192          | Mandarin type       |
| A017 | *      | Dancy                | Obenimikan                      | 315                 | 235   | 372   | 303   | 210     | 141     | 148                  | 130      | 269              | 253   | 164     | C12            | 192          | Mandarin type       |
| A018 | *      | Egami buntan         |                                 | 315                 | 234   | 379   | 298   | 210     | 143     | 148                  | 130      | 274              | 269   | 172     | C04            | 67           | pummelo type        |
| A019 | *      | Fukure mikan         |                                 | 315                 | 235   | 372   | 303   | 210     | 141     | 148                  | 130      | 269              | 253   | 164     | C12            | 192          | Mandarin type       |
| A020 |        | Fukushukan           |                                 | 315                 | 233   | 377   | 305   | 210     | 141     | 148                  | 130      | 274              | 269   | 172     | C06            | 13           | Lemon type          |
| A021 | *      | Funadoko             |                                 | 315                 | 234   | 379   | 298   | 210     | 143     | 148                  | 130      | 274              | 269   | 172     | C04            | 67           | pummelo type        |
| A022 | *      | Genshokan            |                                 | 315                 | 235   | 372   | 303   | 210     | 141     | 148                  | 130      | 269              | 253   | 164     | C12            | 192          | Mandarin type       |
| A023 | *      | Girimikan            |                                 | 315                 | 234   | 378   | 304   | 210     | 142     | 148                  | 130      | 274              | 269   | 172     | C18            | 6            | Koji type           |
| A024 | *      | Grapefruit           | Marsh                           | 315                 | 234   | 379   | 298   | 210     | 143     | 148                  | 130      | 274              | 269   | 172     | C04            | 67           | pummelo type        |
| A025 | *      | Grapefruit           | Red blush                       | 315                 | 234   | 379   | 298   | 210     | 143     | 148                  | 130      | 274              | 269   | 172     | C04            | 67           | pummelo type        |
| A026 | *      | Grapefruit           | Triumph                         | 315                 | 234   | 379   | 298   | 210     | 143     | 148                  | 130      | 274              | 269   | 172     | C04            | 67           | pummelo type        |
| A027 | *      | Hanayu               |                                 | 315                 | 233   | 371   | 311   | 210     | 139     | 159                  | 129      | 274              | 261   | 172     | C09            | 3            | Yuzu type           |
| A028 | *      | Hassaku              |                                 | 315                 | 234   | 379   | 298   | 210     | 143     | 148                  | 130      | 274              | 269   | 172     | C04            | 67           | pummelo type        |
| A029 | *      | Hebesu               |                                 | 315                 | 233   | 377   | 298   | 210     | 143     | 148                  | 130      | 274              | 269   | 172     | C07            | 45           | Sweet orange type   |
| A030 | *      | Henka mikan          |                                 | 315                 | 233   | 377   | 298   | 210     | 143     | 148                  | 130      | 274              | 269   | 172     | C07            | 45           | Sweet orange type   |
| A031 | *      | Hickson              |                                 | 315                 | 235   | 372   | 303   | 210     | 141     | 148                  | 130      | 269              | 253   | 164     | C12            | 192          | Mandarin type       |
| A032 | *      | Hirado buntan        |                                 | 315                 | 234   | 379   | 298   | 210     | 143     | 148                  | 130      | 274              | 269   | 172     | C04            | 67           | pummelo type        |
| A033 | *      | Hiroshimanatsubuntan |                                 | 315                 | 233   | 377   | 305   | 210     | 141     | 148                  | 130      | 274              | 269   | 172     | C06            | 13           | Lemon type          |
| A034 |        | Houraikan            |                                 | 315                 | 234   | 379   | 298   | 210     | 143     | 148                  | 130      | 274              | 269   | 172     | C04            | 67           | pummelo type        |
| A035 | *      | Hyoukan              |                                 | 315                 | 234   | 379   | 298   | 210     | 143     | 148                  | 130      | 274              | 269   | 172     | C04            | 67           | pummelo type        |
| A036 | *      | Hyuganatsu           |                                 | 315                 | 233   | 377   | 298   | 210     | 144     | 148                  | 130      | 274              | 269   | 172     | C05            | 17           | Hyuganatsu type     |
| A037 | *      | Hyuganatsu           | Ihara 1                         | 315                 | 233   | 377   | 298   | 210     | 144     | 148                  | 130      | 274              | 269   | 172     | C05            | 17           | Hyuganatsu type     |
| A038 | *      | Hyuganatsu           | Muroto Konatsu                  | 315                 | 233   | 377   | 298   | 210     | 144     | 148                  | 130      | 274              | 269   | 172     | C05            | 17           | Hyuganatsu type     |
| A039 | *      | Hyuganatsu           | Orange Hyuga                    | 315                 | 233   | 377   | 298   | 210     | 144     | 148                  | 130      | 274              | 269   | 172     | C05            | 17           | Hyuganatsu type     |
| A040 | *      | Hyuganatsu           | Shoukakukei Hyuganatsu          | 315                 | 233   | 377   | 298   | 210     | 144     | 148                  | 130      | 274              | 269   | 172     | C05            | 17           | Hyuganatsu type     |
| A041 | *      | Ichanchii            |                                 | 315                 | 237   | 371   | 306   | 224     | 149     | 159                  | 129      | 274              | 261   | 172     | C01            | 1            | C. ichangensis type |
| A042 | *      | Ichang lemon         |                                 | 315                 | 233   | 377   | 298   | 210     | 145     | 148                  | 130      | 274              | 269   | 172     | C10            | 1            | Ichang lemon type   |
| A043 | *      | Iyo                  | Miyauchi Iyo                    | 315                 | 234   | 379   | 298   | 210     | 143     | 148                  | 130      | 274              | 269   | 172     | C04            | 67           | pummelo type        |
| A044 | *      | Iyo                  | Ootani Iyo                      | 315                 | 234   | 379   | 298   | 210     | 143     | 148                  | 130      | 274              | 269   | 172     | C04            | 67           | pummelo type        |
| A045 | *      | Jabara               |                                 | 315                 | 233   | 377   | 298   | 210     | 143     | 148                  | 130      | 274              | 269   | 172     | C07            | 45           | Sweet orange type   |
| A046 | *      | Jabon                |                                 | 315                 | 234   | 379   | 298   | 210     | 143     | 148                  | 130      | 274              | 269   | 172     | C04            | 67           | pummelo type        |
| A047 | *      | Kabosu               |                                 | 315                 | 233   | 377   | 298   | 210     | 143     | 148                  | 130      | 274              | 269   | 172     | C07            | 45           | Sweet orange type   |
| A048 | *      | Kabuchi              |                                 | 315                 | 233   | 377   | 298   | 210     | 143     | 148                  | 130      | 274              | 269   | 172     | C07            | 45           | Sweet orange type   |
| A049 | *      | Kaikoukan            |                                 | 315                 | 234   | 379   | 298   | 210     | 143     | 148                  | 130      | 274              | 269   | 172     | C04            | 67           | pummelo type        |
| A050 | *      | Kawabata             |                                 | 315                 | 233   | 377   | 298   | 210     | 144     | 148                  | 130      | 274              | 269   | 172     | C05            | 17           | Hyuganatsu type     |
| A051 | *      | Kawachi bankan       |                                 | 315                 | 234   | 379   | 298   | 210     | 143     | 148                  | 130      | 274              | 269   | 172     | C04            | 67           | pummelo type        |
| A052 | *      | Keraji               |                                 | 315                 | 233   | 377   | 298   | 210     | 143     | 148                  | 130      | 274              | 269   | 172     | C07            | 45           | Sweet orange type   |
| A053 | *      | Kikudaidai           |                                 | 315                 | 234   | 379   | 298   | 210     | 143     | 148                  | 130      | 274              | 269   | 172     | C04            | 67           | pummelo type        |
| A054 | *      | King mandarin        |                                 | 315                 | 235   | 372   | 303   | 210     | 141     | 148                  | 130      | 269              | 253   | 164     | C12            | 192          | Mandarin type       |
| A055 | *      | Kinkoji              |                                 | 315                 | 234   | 379   | 298   | 210     | 143     | 148                  | 130      | 274              | 269   | 172     | C04            | 67           | pummelo type        |
| A056 | *      | Kinukawa             |                                 | 315                 | 234   | 379   | 298   | 210     | 143     | 148                  | 130      | 274              | 269   | 172     | C04            | 67           | pummelo type        |
| A057 | *      | Kishu mandarin       | Hira Kishu                      | 315                 | 235   | 372   | 303   | 210     | 141     | 148                  | 130      | 269              | 253   | 164     | C12            | 192          | Mandarin type       |
| A058 | *      | Kishu mandarin       | Hisago Komikan                  | 315                 | 235   | 372   | 303   | 210     | 141     | 148                  | 130      | 269              | 253   | 164     | C12            | 192          | Mandarin type       |
| A059 | *      | Kishu mandarin       | Kishu                           | 315                 | 235   | 372   | 303   | 210     | 141     | 148                  | 130      | 269              | 253   | 164     | C12            | 192          | Mandarin type       |
| A060 | *      | Kishu mandarin       | Kishu mikan                     | 315                 | 235   | 372   | 303   | 210     | 141     | 148                  | 130      | 269              | 253   | 164     | C12            | 192          | Mandarin type       |
| A061 | *      | Kishu mandarin       | Kishu mikan Ihara Ichioji       | 315                 | 235   | 372   | 303   | 210     | 141     | 148                  | 130      | 269              | 253   | 164     | C12            | 192          | Mandarin type       |
| A062 | *      | Kishu mandarin       | Komikan Fukuyama (Kinkou PEARL) | 315                 | 235   | 372   | 303   | 210     | 141     | 148                  | 130      | 269              | 253   | 164     | C12            | 192          | Mandarin type       |
| A063 | *      | Kishu mandarin       | Komikan Kawachi                 | 315                 | 235   | 372   | 303   | 210     | 141     | 148                  | 130      | 269              | 253   | 164     | C12            | 192          | Mandarin type       |
| A064 | *      | Kishu mandarin       | Komikan Tensui                  | 315                 | 235   | 372   | 303   | 210     | 141     | 148                  | 130      | 269              | 253   | 164     | C12            | 192          | Mandarin type       |
| A065 | *      | Kishu mandarin       | Kouda mikan                     | 315                 | 235   | 372   | 303   | 210     | 141     | 148                  | 130      | 269              | 253   | 164     | C12            | 192          | Mandarin type       |
| A066 | *      | Kishu mandarin       | Mukaku Kishu (seedless Kishu)   | 315                 | 235   | 372   | 303   | 210     | 141     | 148                  | 130      | 269              | 253   | 164     | C12            | 192          | Mandarin type       |
| A067 | *      | Kishu mandarin       | Nan feng mi ju                  | 315                 | 235   | 372   | 303   | 210     | 141     | 148                  | 130      | 269              | 253   | 164     | C12            | 192          | Mandarin type       |

|      |                      |                                  |     |     |     |     |     |     |     |     |     |     |     |     |     |                    |
|------|----------------------|----------------------------------|-----|-----|-----|-----|-----|-----|-----|-----|-----|-----|-----|-----|-----|--------------------|
| A068 | Kishu mandarin       | Ozaki Komikan                    | 315 | 235 | 372 | 303 | 210 | 141 | 148 | 130 | 269 | 253 | 164 | C12 | 192 | Mandarin type      |
| A069 | Kishu mandarin       | Sakurajima Komikan Matsuura      | 315 | 235 | 372 | 303 | 210 | 141 | 148 | 130 | 269 | 253 | 164 | C12 | 192 | Mandarin type      |
| A070 | Kishu mandarin       | Sakurajima Komikan senbatsu 1gou | 315 | 235 | 372 | 303 | 210 | 141 | 148 | 130 | 269 | 253 | 164 | C12 | 192 | Mandarin type      |
| A071 | Kishu mandarin       | Sakurajima Komikan Shirahama     | 315 | 235 | 372 | 303 | 210 | 141 | 148 | 130 | 269 | 253 | 164 | C12 | 192 | Mandarin type      |
| A072 | Kishu mandarin       | Taka Mkan                        | 315 | 235 | 372 | 303 | 210 | 141 | 148 | 130 | 269 | 253 | 164 | C12 | 192 | Mandarin type      |
| A073 | * Kizu               |                                  | 315 | 233 | 377 | 298 | 210 | 143 | 148 | 130 | 274 | 269 | 172 | C07 | 45  | Sweet orange type  |
| A074 | * Kobayashi mikan    |                                  | 315 | 234 | 379 | 298 | 210 | 143 | 148 | 130 | 274 | 269 | 172 | C04 | 67  | pummelo type       |
| A075 | * Kobeni mikan       |                                  | 315 | 235 | 372 | 303 | 210 | 141 | 148 | 130 | 269 | 253 | 164 | C12 | 192 | Mandarin type      |
| A076 | * Koji               |                                  | 315 | 234 | 378 | 304 | 210 | 142 | 148 | 130 | 274 | 269 | 172 | C18 | 6   | Koji type          |
| A077 | Komikan 2009-130     |                                  | 315 | 234 | 378 | 304 | 210 | 142 | 148 | 130 | 274 | 269 | 172 | C18 | 6   | Koji type          |
| A078 | * Konejime           |                                  | 315 | 233 | 377 | 299 | 210 | 143 | 148 | 130 | 274 | 269 | 172 | C08 | 2   | Satsumakikoku type |
| A079 | * Kourai Tachibana   |                                  | 315 | 233 | 371 | 311 | 210 | 139 | 159 | 129 | 274 | 261 | 172 | C09 | 3   | Yuzu type          |
| A080 | * Kotokan            |                                  | 315 | 234 | 379 | 298 | 210 | 143 | 148 | 130 | 274 | 269 | 172 | C04 | 67  | pummelo type       |
| A081 | * Kunenbo            |                                  | 315 | 233 | 377 | 298 | 210 | 143 | 148 | 130 | 274 | 269 | 172 | C07 | 45  | Sweet orange type  |
| A082 | * Kunenbo            | Kagoshima 0007                   | 335 | 233 | 374 | 310 | 210 | 141 | 148 | 130 | 269 | 253 | 164 | C11 | 1   | Kunenbo_B type     |
| A083 | Kunenbo              | Kagoshima 0027                   | 315 | 233 | 377 | 298 | 210 | 143 | 148 | 130 | 274 | 269 | 172 | C07 | 45  | Sweet orange type  |
| A084 | Kunenbo              | Kunenbo Kamikoshikijima          | 315 | 233 | 377 | 298 | 210 | 143 | 148 | 130 | 274 | 269 | 172 | C07 | 45  | Sweet orange type  |
| A085 | * Lemon              | Lisbon                           | 315 | 233 | 377 | 305 | 210 | 141 | 148 | 130 | 274 | 269 | 172 | C06 | 13  | Lemon type         |
| A086 | * Lemonade           | LEMONADE                         | 315 | 233 | 377 | 298 | 210 | 144 | 148 | 130 | 274 | 269 | 172 | C05 | 17  | Hyuganatsu type    |
| A087 | * Limonia            |                                  | 315 | 233 | 370 | 304 | 210 | 141 | 148 | 130 | 269 | 261 | 164 | C03 | 1   | Limonia type       |
| A088 | * Mato buntan        |                                  | 315 | 234 | 379 | 298 | 210 | 143 | 148 | 130 | 274 | 269 | 172 | C04 | 67  | pummelo type       |
| A089 | * Mexican lime       |                                  | 315 | 233 | 379 | 305 | 217 | 148 | 148 | 130 | 274 | 261 | 172 | C02 | 1   | Mexican lime       |
| A090 | * Meyer lemon        |                                  | 315 | 233 | 377 | 298 | 210 | 143 | 148 | 130 | 274 | 269 | 172 | C07 | 45  | Sweet orange type  |
| A091 | * Mochiyu            |                                  | 315 | 233 | 377 | 298 | 210 | 143 | 148 | 130 | 274 | 269 | 172 | C07 | 45  | Sweet orange type  |
| A092 | * Murcott            |                                  | 315 | 235 | 372 | 303 | 210 | 141 | 148 | 130 | 269 | 253 | 164 | C12 | 192 | Mandarin type      |
| A093 | * Myrtle leaf orange | Chinott                          | 315 | 233 | 377 | 305 | 210 | 141 | 148 | 130 | 274 | 269 | 172 | C06 | 13  | Lemon type         |
| A094 | * Nansho daidai      |                                  | 315 | 233 | 377 | 298 | 210 | 143 | 148 | 130 | 274 | 269 | 172 | C07 | 45  | Sweet orange type  |
| A095 | * Naruto             |                                  | 315 | 234 | 379 | 298 | 210 | 143 | 148 | 130 | 274 | 269 | 172 | C04 | 67  | pummelo type       |
| A096 | Natsudaikai          |                                  | 315 | 234 | 379 | 298 | 210 | 143 | 148 | 130 | 274 | 269 | 172 | C04 | 67  | pummelo type       |
| A097 | Natsudaikai          | Beniamanatsu                     | 315 | 234 | 379 | 298 | 210 | 143 | 148 | 130 | 274 | 269 | 172 | C04 | 67  | pummelo type       |
| A098 | * Natsudaikai        | Kawano Natsudaikai               | 315 | 234 | 379 | 298 | 210 | 143 | 148 | 130 | 274 | 269 | 172 | C04 | 67  | pummelo type       |
| A099 | * Natsudaikai        | Tachibana orange                 | 315 | 234 | 379 | 298 | 210 | 143 | 148 | 130 | 274 | 269 | 172 | C04 | 67  | pummelo type       |
| A100 | * Nidonari mikan     |                                  | 315 | 235 | 372 | 303 | 210 | 141 | 148 | 130 | 269 | 253 | 164 | C12 | 192 | Mandarin type      |
| A101 | * Oogonkan           |                                  | 315 | 233 | 377 | 298 | 210 | 144 | 148 | 130 | 274 | 269 | 172 | C05 | 17  | Hyuganatsu type    |
| A102 | * Ootachibana        |                                  | 315 | 234 | 379 | 298 | 210 | 143 | 148 | 130 | 274 | 269 | 172 | C04 | 67  | pummelo type       |
| A103 | * Ootoukan           |                                  | 315 | 234 | 379 | 298 | 210 | 143 | 148 | 130 | 274 | 269 | 172 | C04 | 67  | pummelo type       |
| A104 | * Oukan              |                                  | 315 | 234 | 379 | 298 | 210 | 143 | 148 | 130 | 274 | 269 | 172 | C04 | 67  | pummelo type       |
| A105 | Ponkan               | Ihara ponkan                     | 315 | 235 | 372 | 303 | 210 | 141 | 148 | 130 | 269 | 253 | 164 | C12 | 192 | Mandarin type      |
| A106 | Ponkan               | Morita ponkan                    | 315 | 235 | 372 | 303 | 210 | 141 | 148 | 130 | 269 | 253 | 164 | C12 | 192 | Mandarin type      |
| A107 | * Ponkan             | Oota ponkan                      | 315 | 235 | 372 | 303 | 210 | 141 | 148 | 130 | 269 | 253 | 164 | C12 | 192 | Mandarin type      |
| A108 | Ponkan               | Yoshida ponkan                   | 315 | 235 | 372 | 303 | 210 | 141 | 148 | 130 | 269 | 253 | 164 | C12 | 192 | Mandarin type      |
| A109 | * Ponkitsu           |                                  | 315 | 235 | 370 | 305 | 210 | 141 | 148 | 130 | 269 | 261 | 164 | C13 | 7   | Sunki type         |
| A110 | * Pummelo whitetype  |                                  | 315 | 234 | 379 | 298 | 210 | 143 | 148 | 130 | 274 | 269 | 172 | C04 | 67  | pummelo type       |
| A111 | * Rokugatsumikan     |                                  | 315 | 233 | 377 | 305 | 210 | 141 | 148 | 130 | 274 | 269 | 172 | C06 | 13  | Lemon type         |
| A112 | * Sanbokan           |                                  | 315 | 234 | 379 | 298 | 210 | 143 | 148 | 130 | 274 | 269 | 172 | C04 | 67  | pummelo type       |
| A113 | Satsuma mandarin     | Aoshima Unshu                    | 315 | 235 | 372 | 303 | 210 | 141 | 148 | 130 | 269 | 253 | 164 | C12 | 192 | Mandarin type      |
| A114 | Satsuma mandarin     | Dobashi Beni                     | 315 | 235 | 372 | 303 | 210 | 141 | 148 | 130 | 269 | 253 | 164 | C12 | 192 | Mandarin type      |
| A115 | Satsuma mandarin     | Haraguchi Wase                   | 315 | 235 | 372 | 303 | 210 | 141 | 148 | 130 | 269 | 253 | 164 | C12 | 192 | Mandarin type      |
| A116 | Satsuma mandarin     | Imamura Unshu                    | 315 | 235 | 372 | 303 | 210 | 141 | 148 | 130 | 269 | 253 | 164 | C12 | 192 | Mandarin type      |
| A117 | Satsuma mandarin     | Iwasaki Wase                     | 315 | 235 | 372 | 303 | 210 | 141 | 148 | 130 | 269 | 253 | 164 | C12 | 192 | Mandarin type      |
| A118 | Satsuma mandarin     | Juman Unshu                      | 315 | 235 | 372 | 303 | 210 | 141 | 148 | 130 | 269 | 253 | 164 | C12 | 192 | Mandarin type      |
| A119 | Satsuma mandarin     | Jutaro Unshu NC                  | 315 | 235 | 372 | 303 | 210 | 141 | 148 | 130 | 269 | 253 | 164 | C12 | 192 | Mandarin type      |
| A120 | Satsuma mandarin     | Kinokuni Unshu                   | 315 | 235 | 372 | 303 | 210 | 141 | 148 | 130 | 269 | 253 | 164 | C12 | 192 | Mandarin type      |
| A121 | Satsuma mandarin     | Kuno Unshu                       | 315 | 235 | 372 | 303 | 210 | 141 | 148 | 130 | 269 | 253 | 164 | C12 | 192 | Mandarin type      |
| A122 | Satsuma mandarin     | Miyagawa Wase                    | 315 | 235 | 372 | 303 | 210 | 141 | 148 | 130 | 269 | 253 | 164 | C12 | 192 | Mandarin type      |
| A123 | Satsuma mandarin     | Naqahashi Unshu NC               | 315 | 235 | 372 | 303 | 210 | 141 | 148 | 130 | 269 | 253 | 164 | C12 | 192 | Mandarin type      |
| A124 | Satsuma mandarin     | Niu Unshu                        | 315 | 235 | 372 | 303 | 210 | 141 | 148 | 130 | 269 | 253 | 164 | C12 | 192 | Mandarin type      |
| A125 | * Satsuma mandarin   | Okitsu Wase (NC)                 | 315 | 235 | 372 | 303 | 210 | 141 | 148 | 130 | 269 | 253 | 164 | C12 | 192 | Mandarin type      |
| A126 | Satsuma mandarin     | Original tree                    | 315 | 235 | 372 | 303 | 210 | 141 | 148 | 130 | 269 | 253 | 164 | C12 | 192 | Mandarin type      |
| A127 | Satsuma mandarin     | Otsu-4 (NC)                      | 315 | 235 | 372 | 303 | 210 | 141 | 148 | 130 | 269 | 253 | 164 | C12 | 192 | Mandarin type      |
| A128 | Satsuma mandarin     | Shirakawa Unshu                  | 315 | 235 | 372 | 303 | 210 | 141 | 148 | 130 | 269 | 253 | 164 | C12 | 192 | Mandarin type      |
| A129 | Satsuma mandarin     | Sugiyama Unshu                   | 315 | 235 | 372 | 303 | 210 | 141 | 148 | 130 | 269 | 253 | 164 | C12 | 192 | Mandarin type      |
| A130 | Satsuma mandarin     | Suruga Beni                      | 315 | 235 | 372 | 303 | 210 | 141 | 148 | 130 | 269 | 253 | 164 | C12 | 192 | Mandarin type      |
| A131 | Satsuma mandarin     | Ueno Wase                        | 315 | 235 | 372 | 303 | 210 | 141 | 148 | 130 | 269 | 253 | 164 | C12 | 192 | Mandarin type      |
| A132 | Satsuma mandarin     | Yamada Unshu NC                  | 315 | 235 | 372 | 303 | 210 | 141 | 148 | 130 | 269 | 253 | 164 | C12 | 192 | Mandarin type      |
| A133 | Satsuma mandarin     | Yamashita Beni                   | 315 | 235 | 372 | 303 | 210 | 141 | 148 | 130 | 269 | 253 | 164 | C12 | 192 | Mandarin type      |
| A134 | * Satsuma Kikoku     |                                  | 315 | 233 | 377 | 299 | 210 | 143 | 148 | 130 | 274 | 269 | 172 | C08 | 2   | Satsumakikoku type |
| A135 | * Shiikuwasha        |                                  | 315 | 235 | 370 | 305 | 210 | 141 | 148 | 130 | 269 | 261 | 164 | C13 | 7   | Sunki type         |
| A136 | * Shiikuwasha        | Oogimi Kuganii                   | 335 | 234 | 374 | 310 | 210 | 142 | 148 | 130 | 269 | 253 | 164 | C16 | 1   | Ogimikuganii type  |
| A137 | * Shunkokan          |                                  | 315 | 234 | 379 | 298 | 210 | 143 | 148 | 130 | 274 | 269 | 172 | C04 | 67  | pummelo type       |
| A138 | * Sokitsu            |                                  | 315 | 235 | 372 | 303 | 210 | 141 | 148 | 130 | 269 | 253 | 164 | C12 | 192 | Mandarin type      |
| A139 | Sour orange          | Bouquet de Fleurs                | 315 | 233 | 377 | 305 | 210 | 141 | 148 | 130 | 274 | 269 | 172 | C06 | 13  | Lemon type         |
| A140 | Sour orange          | Chaozhouchen                     | 315 | 233 | 377 | 305 | 210 | 141 | 148 | 130 | 274 | 269 | 172 | C06 | 13  | Lemon type         |

|      |   |                      |                            |     |     |     |     |     |     |     |     |     |     |     |     |     |                   |
|------|---|----------------------|----------------------------|-----|-----|-----|-----|-----|-----|-----|-----|-----|-----|-----|-----|-----|-------------------|
| A141 | * | Sour orange          | Daidai                     | 315 | 233 | 377 | 305 | 210 | 141 | 148 | 130 | 274 | 269 | 172 | C06 | 13  | Lemon type        |
| A142 |   | Sour orange          | Kaiseito                   | 315 | 233 | 377 | 305 | 210 | 141 | 148 | 130 | 274 | 269 | 172 | C06 | 13  | Lemon type        |
| A143 |   | Sour orange          | Za daidai                  | 315 | 233 | 377 | 305 | 210 | 141 | 148 | 130 | 274 | 269 | 172 | C06 | 13  | Lemon type        |
| A144 | * | Sudachi              |                            | 315 | 234 | 378 | 304 | 210 | 142 | 148 | 130 | 274 | 269 | 172 | C18 | 6   | Koji type         |
| A145 | * | Suisho buntan        |                            | 315 | 234 | 379 | 298 | 210 | 143 | 148 | 130 | 274 | 269 | 172 | C04 | 67  | pummelo type      |
| A146 | * | Sunki                |                            | 315 | 235 | 370 | 305 | 210 | 141 | 148 | 130 | 269 | 261 | 164 | C13 | 7   | Sunki type        |
| A147 | * | Suruga Yuko          |                            | 315 | 235 | 372 | 303 | 210 | 141 | 148 | 130 | 269 | 253 | 164 | C12 | 192 | Mandarin type     |
| A148 |   | Sweet orange         | Cadenera                   | 315 | 233 | 377 | 298 | 210 | 143 | 148 | 130 | 274 | 269 | 172 | C07 | 45  | Sweet orange type |
| A149 |   | Sweet orange         | Cara Cara                  | 315 | 233 | 377 | 298 | 210 | 143 | 148 | 130 | 274 | 269 | 172 | C07 | 45  | Sweet orange type |
| A150 |   | Sweet orange         | Crescent                   | 315 | 233 | 377 | 298 | 210 | 143 | 148 | 130 | 274 | 269 | 172 | C07 | 45  | Sweet orange type |
| A151 |   | Sweet orange         | Hamlin                     | 315 | 233 | 377 | 298 | 210 | 143 | 148 | 130 | 274 | 269 | 172 | C07 | 45  | Sweet orange type |
| A152 |   | Sweet orange         | Jin Cheng                  | 315 | 233 | 377 | 298 | 210 | 143 | 148 | 130 | 274 | 269 | 172 | C07 | 45  | Sweet orange type |
| A153 |   | Sweet orange         | Joppa                      | 315 | 233 | 377 | 298 | 210 | 143 | 148 | 130 | 274 | 269 | 172 | C07 | 45  | Sweet orange type |
| A154 |   | Sweet orange         | Mediterranean Sweet Orange | 315 | 233 | 377 | 298 | 210 | 143 | 148 | 130 | 274 | 269 | 172 | C07 | 45  | Sweet orange type |
| A155 |   | Sweet orange         | Moro NC                    | 315 | 233 | 377 | 298 | 210 | 143 | 148 | 130 | 274 | 269 | 172 | C07 | 45  | Sweet orange type |
| A156 |   | Sweet orange         | Parson Brown               | 315 | 233 | 377 | 298 | 210 | 143 | 148 | 130 | 274 | 269 | 172 | C07 | 45  | Sweet orange type |
| A157 |   | Sweet orange         | Pineapple                  | 315 | 233 | 377 | 298 | 210 | 143 | 148 | 130 | 274 | 269 | 172 | C07 | 45  | Sweet orange type |
| A158 |   | Sweet orange         | Santa Catarina             | 315 | 233 | 377 | 298 | 210 | 143 | 148 | 130 | 274 | 269 | 172 | C07 | 45  | Sweet orange type |
| A159 |   | Sweet orange         | Seike navel                | 315 | 233 | 377 | 298 | 210 | 143 | 148 | 130 | 274 | 269 | 172 | C07 | 45  | Sweet orange type |
| A160 |   | Sweet orange         | Shamouti                   | 315 | 233 | 377 | 298 | 210 | 143 | 148 | 130 | 274 | 269 | 172 | C07 | 45  | Sweet orange type |
| A161 |   | Sweet orange         | Tong Zi Gan                | 315 | 233 | 377 | 298 | 210 | 143 | 148 | 130 | 274 | 269 | 172 | C07 | 45  | Sweet orange type |
| A162 | * | Sweet orange         | Trovita                    | 315 | 233 | 377 | 298 | 210 | 143 | 148 | 130 | 274 | 269 | 172 | C07 | 45  | Sweet orange type |
| A163 |   | Sweet orange         | Washington navel           | 315 | 233 | 377 | 298 | 210 | 143 | 148 | 130 | 274 | 269 | 172 | C07 | 45  | Sweet orange type |
| A164 |   | Sweet orange         | Valencia                   | 315 | 233 | 377 | 298 | 210 | 143 | 148 | 130 | 274 | 269 | 172 | C07 | 45  | Sweet orange type |
| A165 |   | Sweet orange         | Wu Yue Cheng               | 315 | 233 | 377 | 298 | 210 | 143 | 148 | 130 | 274 | 269 | 172 | C07 | 45  | Sweet orange type |
| A166 |   | Sweet orange         | Xue Gan                    | 315 | 233 | 377 | 298 | 210 | 143 | 148 | 130 | 274 | 269 | 172 | C07 | 45  | Sweet orange type |
| A167 |   | Sweet orange         | Yinzi Gan                  | 315 | 233 | 377 | 298 | 210 | 143 | 148 | 130 | 274 | 269 | 172 | C07 | 45  | Sweet orange type |
| A168 |   | Tachibana            |                            | 335 | 233 | 374 | 310 | 210 | 142 | 148 | 130 | 269 | 253 | 164 | C14 | 11  | Tachibana type    |
| A169 |   | Tachibana            | Anettaishijou              | 335 | 233 | 374 | 310 | 210 | 142 | 148 | 130 | 269 | 253 | 164 | C14 | 11  | Tachibana type    |
| A170 |   | Tachibana            | Botanical garden           | 335 | 233 | 374 | 310 | 210 | 142 | 148 | 130 | 269 | 253 | 164 | C14 | 11  | Tachibana type    |
| A171 |   | Tachibana            | Hananoiwaya                | 335 | 233 | 374 | 310 | 210 | 142 | 148 | 130 | 269 | 253 | 164 | C14 | 11  | Tachibana type    |
| A172 | * | Tachibana            | Heda 1                     | 335 | 233 | 374 | 310 | 210 | 142 | 148 | 130 | 269 | 253 | 164 | C14 | 11  | Tachibana type    |
| A173 |   | Tachibana            | Heda 2                     | 335 | 233 | 374 | 310 | 210 | 142 | 148 | 130 | 269 | 253 | 164 | C14 | 11  | Tachibana type    |
| A174 | * | Tachibana            | Ishinami Minka             | 315 | 234 | 371 | 305 | 210 | 141 | 148 | 130 | 269 | 261 | 164 | C15 | 1   | Tachibana_C type  |
| A175 | * | Tachibana            | Ishinami No.1              | 335 | 233 | 374 | 310 | 210 | 142 | 148 | 130 | 269 | 253 | 164 | C14 | 11  | Tachibana type    |
| A176 |   | Tachibana            | Ishinami No.2              | 335 | 233 | 374 | 310 | 210 | 142 | 148 | 130 | 269 | 253 | 164 | C14 | 11  | Tachibana type    |
| A177 |   | Tachibana            | Oodomari OP-2              | 335 | 233 | 374 | 310 | 210 | 142 | 148 | 130 | 269 | 253 | 164 | C14 | 11  | Tachibana type    |
| A178 |   | Tachibana            | Okitsu                     | 335 | 233 | 374 | 310 | 210 | 142 | 148 | 130 | 269 | 253 | 164 | C14 | 11  | Tachibana type    |
| A179 |   | Tachibana            | Reizanji                   | 335 | 233 | 374 | 310 | 210 | 142 | 148 | 130 | 269 | 253 | 164 | C14 | 11  | Tachibana type    |
| A180 |   | Tajima mikan         |                            | 315 | 234 | 378 | 304 | 210 | 142 | 148 | 130 | 274 | 269 | 172 | C18 | 6   | Koji type         |
| A181 |   | Takumanatsukunenbo   |                            | 315 | 233 | 377 | 305 | 210 | 141 | 148 | 130 | 274 | 269 | 172 | C06 | 13  | Lemon type        |
| A182 |   | Tankan               |                            | 315 | 235 | 370 | 305 | 210 | 141 | 148 | 130 | 269 | 261 | 164 | C13 | 7   | Sunki type        |
| A183 | * | Tankan               | Taishun                    | 315 | 235 | 370 | 305 | 210 | 141 | 148 | 130 | 269 | 261 | 164 | C13 | 7   | Sunki type        |
| A184 |   | Tankan               | Tarumizu 1                 | 315 | 235 | 370 | 305 | 210 | 141 | 148 | 130 | 269 | 261 | 164 | C13 | 7   | Sunki type        |
| A185 | * | Tankan               | T-132                      | 315 | 235 | 370 | 305 | 210 | 141 | 148 | 130 | 269 | 261 | 164 | C13 | 7   | Sunki type        |
| A186 | * | Temple               |                            | 315 | 235 | 372 | 303 | 210 | 141 | 148 | 130 | 269 | 253 | 164 | C12 | 192 | Mandarin type     |
| A187 | * | Tengu                |                            | 315 | 233 | 377 | 298 | 210 | 144 | 148 | 130 | 274 | 269 | 172 | C05 | 17  | Hyuganatsu type   |
| A188 | * | Tizon                |                            | 315 | 233 | 377 | 298 | 210 | 143 | 148 | 130 | 274 | 269 | 172 | C07 | 45  | Sweet orange type |
| A189 |   | Toukan               |                            | 315 | 234 | 378 | 304 | 210 | 142 | 148 | 130 | 274 | 269 | 172 | C18 | 6   | Koji type         |
| A190 |   | Tookunin             |                            | 315 | 233 | 377 | 298 | 210 | 143 | 148 | 130 | 274 | 269 | 172 | C07 | 45  | Sweet orange type |
| A191 | * | Tosa buntan          |                            | 315 | 234 | 379 | 298 | 210 | 143 | 148 | 130 | 274 | 269 | 172 | C04 | 67  | pummelo type      |
| A192 | * | Twukkuni             |                            | 315 | 233 | 377 | 298 | 210 | 143 | 148 | 130 | 274 | 269 | 172 | C07 | 45  | Sweet orange type |
| A193 |   | Twukkunin            |                            | 315 | 233 | 377 | 298 | 210 | 143 | 148 | 130 | 274 | 269 | 172 | C07 | 45  | Sweet orange type |
| A194 |   | Twukunihu            |                            | 315 | 233 | 377 | 298 | 210 | 143 | 148 | 130 | 274 | 269 | 172 | C07 | 45  | Sweet orange type |
| A195 |   | Twuukuribu           |                            | 315 | 233 | 377 | 298 | 210 | 143 | 148 | 130 | 274 | 269 | 172 | C07 | 45  | Sweet orange type |
| A196 | * | Uchimurasaki         |                            | 315 | 234 | 379 | 298 | 210 | 143 | 148 | 130 | 274 | 269 | 172 | C04 | 67  | pummelo type      |
| A197 | * | Ujukitsu             |                            | 315 | 234 | 379 | 298 | 210 | 143 | 148 | 130 | 274 | 269 | 172 | C04 | 67  | pummelo type      |
| A198 | * | Unzoki               |                            | 315 | 233 | 377 | 298 | 210 | 143 | 148 | 130 | 274 | 269 | 172 | C07 | 45  | Sweet orange type |
| A199 | * | USSR Tangelo         |                            | 315 | 235 | 372 | 303 | 210 | 141 | 148 | 130 | 269 | 253 | 164 | C12 | 192 | Mandarin type     |
| A200 | * | Willowleaf mandarin  | Mediterranean mandarin     | 315 | 235 | 372 | 303 | 210 | 141 | 148 | 130 | 269 | 253 | 164 | C12 | 192 | Mandarin type     |
| A201 | * | Willowleaf mandarin  | Willowleaf mandarin        | 315 | 235 | 372 | 303 | 210 | 141 | 148 | 130 | 269 | 253 | 164 | C12 | 192 | Mandarin type     |
| A202 | * | Yamabuki             |                            | 315 | 234 | 379 | 298 | 210 | 143 | 148 | 130 | 274 | 269 | 172 | C04 | 67  | pummelo type      |
| A203 | * | Yamamikan            |                            | 315 | 233 | 377 | 298 | 210 | 143 | 148 | 130 | 274 | 269 | 172 | C07 | 45  | Sweet orange type |
| A204 | * | Yatsushiro           |                            | 315 | 233 | 377 | 298 | 210 | 143 | 148 | 130 | 274 | 269 | 172 | C07 | 45  | Sweet orange type |
| A205 | * | Yuge hyoukan         |                            | 315 | 234 | 379 | 298 | 210 | 143 | 148 | 130 | 274 | 269 | 172 | C04 | 67  | pummelo type      |
| A206 | * | Youpi ju (Yuhikitsu) |                            | 315 | 235 | 372 | 303 | 210 | 141 | 148 | 130 | 269 | 253 | 164 | C12 | 192 | Mandarin type     |
| A207 | * | Yuukunibu            |                            | 315 | 234 | 379 | 298 | 210 | 143 | 148 | 130 | 274 | 269 | 172 | C04 | 67  | pummelo type      |
| A208 | * | Yuzu                 |                            | 315 | 233 | 371 | 311 | 210 | 139 | 159 | 129 | 274 | 261 | 172 | C09 | 3   | Yuzu type         |

## B: hybrid varieties

| No.  | Rep 1) | Variety           | Chloroplast markers |       |       |       |         |         |         | Mitochondria markers |                     |                 | Class | Same GT | Organelar type |                   |
|------|--------|-------------------|---------------------|-------|-------|-------|---------|---------|---------|----------------------|---------------------|-----------------|-------|---------|----------------|-------------------|
|      |        |                   | CSS03               | CSS04 | CSL01 | CSL09 | ccmp2.2 | ccmp6.2 | ccmp7.2 | ccmp10.2             | <i>rrn5/rrn18-1</i> | <i>nad2/4-3</i> |       |         |                | <i>nad7/1-2</i>   |
| B001 | *      | Akemi             | 315                 | 235   | 372   | 303   | 210     | 141     | 148     | 130                  | 269                 | 253             | 164   | C12     | 192            | Mandarin type     |
| B002 | *      | Aki Marine        | 315                 | 235   | 372   | 303   | 210     | 141     | 148     | 130                  | 269                 | 253             | 164   | C12     | 192            | Mandarin type     |
| B003 | *      | Aki Tangor        | 315                 | 235   | 372   | 303   | 210     | 141     | 148     | 130                  | 269                 | 253             | 164   | C12     | 192            | Mandarin type     |
| B004 | *      | All spice         | 315                 | 234   | 379   | 298   | 210     | 143     | 148     | 130                  | 274                 | 269             | 172   | C04     | 67             | pummelo type      |
| B005 | *      | Amaka             | 315                 | 235   | 372   | 303   | 210     | 141     | 148     | 130                  | 269                 | 253             | 164   | C12     | 192            | Mandarin type     |
| B006 | *      | Ariake            | 315                 | 233   | 377   | 298   | 210     | 143     | 148     | 130                  | 274                 | 269             | 172   | C07     | 45             | Sweet orange type |
| B007 | *      | Asumi             | 315                 | 235   | 372   | 303   | 210     | 141     | 148     | 130                  | 269                 | 253             | 164   | C12     | 192            | Mandarin type     |
| B008 | *      | Aurastar          | 315                 | 234   | 379   | 298   | 210     | 143     | 148     | 130                  | 274                 | 269             | 172   | C04     | 67             | pummelo type      |
| B009 | *      | Awa Orange        | 315                 | 233   | 377   | 298   | 210     | 144     | 148     | 130                  | 274                 | 269             | 172   | C05     | 17             | Hyuganatsu type   |
| B010 | *      | Benibae           | 315                 | 235   | 372   | 303   | 210     | 141     | 148     | 130                  | 269                 | 253             | 164   | C12     | 192            | Mandarin type     |
| B011 | *      | Benimadoka        | 315                 | 234   | 379   | 298   | 210     | 143     | 148     | 130                  | 274                 | 269             | 172   | C04     | 67             | pummelo type      |
| B012 | *      | Chandler pummelo  | 315                 | 234   | 379   | 298   | 210     | 143     | 148     | 130                  | 274                 | 269             | 172   | C04     | 67             | pummelo type      |
| B013 | *      | Ehimekashi 28     | 315                 | 235   | 372   | 303   | 210     | 141     | 148     | 130                  | 269                 | 253             | 164   | C12     | 192            | Mandarin type     |
| B014 | *      | Encore            | 315                 | 235   | 372   | 303   | 210     | 141     | 148     | 130                  | 269                 | 253             | 164   | C12     | 192            | Mandarin type     |
| B015 | *      | Fairchild         | 315                 | 235   | 372   | 303   | 210     | 141     | 148     | 130                  | 269                 | 253             | 164   | C12     | 192            | Mandarin type     |
| B016 | *      | Fortune           | 315                 | 235   | 372   | 303   | 210     | 141     | 148     | 130                  | 269                 | 253             | 164   | C12     | 192            | Mandarin type     |
| B017 | *      | Harehime          | 315                 | 235   | 372   | 303   | 210     | 141     | 148     | 130                  | 269                 | 253             | 164   | C12     | 192            | Mandarin type     |
| B018 | *      | Hareyaka          | 315                 | 235   | 372   | 303   | 210     | 141     | 148     | 130                  | 269                 | 253             | 164   | C12     | 192            | Mandarin type     |
| B019 | *      | Haruhi            | 315                 | 235   | 372   | 303   | 210     | 141     | 148     | 130                  | 269                 | 253             | 164   | C12     | 192            | Mandarin type     |
| B020 | *      | Haruka            | 315                 | 233   | 377   | 298   | 210     | 144     | 148     | 130                  | 274                 | 269             | 172   | C05     | 17             | Hyuganatsu type   |
| B021 | *      | Harumi            | 315                 | 235   | 372   | 303   | 210     | 141     | 148     | 130                  | 269                 | 253             | 164   | C12     | 192            | Mandarin type     |
| B022 | *      | Hayaka            | 315                 | 235   | 372   | 303   | 210     | 141     | 148     | 130                  | 269                 | 253             | 164   | C12     | 192            | Mandarin type     |
| B023 | *      | Hayasaki          | 315                 | 234   | 379   | 298   | 210     | 143     | 148     | 130                  | 274                 | 269             | 172   | C04     | 67             | pummelo type      |
| B024 | *      | Himekoharu        | 315                 | 235   | 372   | 303   | 210     | 141     | 148     | 130                  | 269                 | 253             | 164   | C12     | 192            | Mandarin type     |
| B025 | *      | Hiroshimakaken 11 | 315                 | 235   | 372   | 303   | 210     | 141     | 148     | 130                  | 269                 | 253             | 164   | C12     | 192            | Mandarin type     |
| B026 | *      | Honey             | 315                 | 235   | 372   | 303   | 210     | 141     | 148     | 130                  | 269                 | 253             | 164   | C12     | 192            | Mandarin type     |
| B027 | *      | Kanpei            | 315                 | 235   | 372   | 303   | 210     | 141     | 148     | 130                  | 269                 | 253             | 164   | C12     | 192            | Mandarin type     |
| B028 | *      | Kara mandarin     | 315                 | 235   | 372   | 303   | 210     | 141     | 148     | 130                  | 269                 | 253             | 164   | C12     | 192            | Mandarin type     |
| B029 | *      | Kincy mandarin    | 315                 | 235   | 372   | 303   | 210     | 141     | 148     | 130                  | 269                 | 253             | 164   | C12     | 192            | Mandarin type     |
| B030 | *      | Kinnow mandarin   | 315                 | 235   | 372   | 303   | 210     | 141     | 148     | 130                  | 269                 | 253             | 164   | C12     | 192            | Mandarin type     |
| B031 | *      | Kiyomi            | 315                 | 235   | 372   | 303   | 210     | 141     | 148     | 130                  | 269                 | 253             | 164   | C12     | 192            | Mandarin type     |
| B032 | *      | Kuchinotsu-41 *   | 315                 | 233   | 377   | 298   | 210     | 144     | 148     | 130                  | 274                 | 269             | 172   | C05     | 17             | Hyuganatsu type   |
| B033 | *      | Lee               | 315                 | 235   | 372   | 303   | 210     | 141     | 148     | 130                  | 269                 | 253             | 164   | C12     | 192            | Mandarin type     |
| B034 | *      | May pummelo       | 315                 | 234   | 379   | 298   | 210     | 143     | 148     | 130                  | 274                 | 269             | 172   | C04     | 67             | pummelo type      |
| B035 | *      | Mihaya            | 315                 | 235   | 372   | 303   | 210     | 141     | 148     | 130                  | 269                 | 253             | 164   | C12     | 192            | Mandarin type     |
| B036 | *      | Mihocore          | 315                 | 235   | 372   | 303   | 210     | 141     | 148     | 130                  | 269                 | 253             | 164   | C12     | 192            | Mandarin type     |
| B037 | *      | Mineola           | 315                 | 234   | 379   | 298   | 210     | 143     | 148     | 130                  | 274                 | 269             | 172   | C04     | 67             | pummelo type      |
| B038 | *      | Nankou            | 315                 | 235   | 372   | 303   | 210     | 141     | 148     | 130                  | 269                 | 253             | 164   | C12     | 192            | Mandarin type     |
| B039 | *      | Nishinokaori      | 315                 | 235   | 372   | 303   | 210     | 141     | 148     | 130                  | 269                 | 253             | 164   | C12     | 192            | Mandarin type     |
| B040 | *      | Nou 5 gou         | 315                 | 235   | 372   | 303   | 210     | 141     | 148     | 130                  | 269                 | 253             | 164   | C12     | 192            | Mandarin type     |
| B041 | *      | Nou 6 gou         | 315                 | 235   | 372   | 303   | 210     | 141     | 148     | 130                  | 269                 | 253             | 164   | C12     | 192            | Mandarin type     |
| B042 | *      | Nou 7 gou         | 315                 | 234   | 379   | 298   | 210     | 143     | 148     | 130                  | 274                 | 269             | 172   | C04     | 67             | pummelo type      |
| B043 | *      | Nova              | 315                 | 235   | 372   | 303   | 210     | 141     | 148     | 130                  | 269                 | 253             | 164   | C12     | 192            | Mandarin type     |
| B044 | *      | Ooitakaken-4      | 315                 | 235   | 372   | 303   | 210     | 141     | 148     | 130                  | 269                 | 253             | 164   | C12     | 192            | Mandarin type     |
| B045 | *      | Orland            | 315                 | 234   | 379   | 298   | 210     | 143     | 148     | 130                  | 274                 | 269             | 172   | C04     | 67             | pummelo type      |
| B046 | *      | Oroblanco         | 315                 | 234   | 379   | 298   | 210     | 143     | 148     | 130                  | 274                 | 269             | 172   | C04     | 67             | pummelo type      |
| B047 | *      | Osceola           | 315                 | 235   | 372   | 303   | 210     | 141     | 148     | 130                  | 269                 | 253             | 164   | C12     | 192            | Mandarin type     |
| B048 | *      | Page              | 315                 | 234   | 379   | 298   | 210     | 143     | 148     | 130                  | 274                 | 269             | 172   | C04     | 67             | pummelo type      |
| B049 | *      | Pearl             | 315                 | 234   | 379   | 298   | 210     | 143     | 148     | 130                  | 274                 | 269             | 172   | C04     | 67             | pummelo type      |
| B050 | *      | Pixie mandarin    | 315                 | 235   | 372   | 303   | 210     | 141     | 148     | 130                  | 269                 | 253             | 164   | C12     | 192            | Mandarin type     |
| B051 | *      | Robinson          | 315                 | 235   | 372   | 303   | 210     | 141     | 148     | 130                  | 269                 | 253             | 164   | C12     | 192            | Mandarin type     |
| B052 | *      | Saga Mandarin     | 315                 | 235   | 372   | 303   | 210     | 141     | 148     | 130                  | 269                 | 253             | 164   | C12     | 192            | Mandarin type     |
| B053 | *      | Sagakashi 34      | 315                 | 235   | 372   | 303   | 210     | 141     | 148     | 130                  | 269                 | 253             | 164   | C12     | 192            | Mandarin type     |
| B054 | *      | Seihou            | 315                 | 235   | 372   | 303   | 210     | 141     | 148     | 130                  | 269                 | 253             | 164   | C12     | 192            | Mandarin type     |
| B055 | *      | Seinannohikari    | 315                 | 235   | 372   | 303   | 210     | 141     | 148     | 130                  | 269                 | 253             | 164   | C12     | 192            | Mandarin type     |
| B056 | *      | Seminor           | 315                 | 234   | 379   | 298   | 210     | 143     | 148     | 130                  | 274                 | 269             | 172   | C04     | 67             | pummelo type      |
| B057 | *      | Setomi            | 315                 | 235   | 372   | 303   | 210     | 141     | 148     | 130                  | 269                 | 253             | 164   | C12     | 192            | Mandarin type     |
| B058 | *      | Shiranuhi         | 315                 | 235   | 372   | 303   | 210     | 141     | 148     | 130                  | 269                 | 253             | 164   | C12     | 192            | Mandarin type     |
| B059 | *      | Southern Yellow   | 315                 | 233   | 377   | 298   | 210     | 144     | 148     | 130                  | 274                 | 269             | 172   | C05     | 17             | Hyuganatsu type   |
| B060 | *      | Summer Fresh      | 315                 | 234   | 379   | 298   | 210     | 143     | 148     | 130                  | 274                 | 269             | 172   | C04     | 67             | pummelo type      |
| B061 | *      | Sweet Spring      | 315                 | 235   | 372   | 303   | 210     | 141     | 148     | 130                  | 269                 | 253             | 164   | C12     | 192            | Mandarin type     |
| B062 | *      | Tamami            | 315                 | 235   | 372   | 303   | 210     | 141     | 148     | 130                  | 269                 | 253             | 164   | C12     | 192            | Mandarin type     |
| B063 | *      | Tanikawa Buntan   | 315                 | 233   | 377   | 298   | 210     | 144     | 148     | 130                  | 274                 | 269             | 172   | C05     | 17             | Hyuganatsu type   |
| B064 | *      | Tsunokagayaki     | 315                 | 235   | 372   | 303   | 210     | 141     | 148     | 130                  | 269                 | 253             | 164   | C12     | 192            | Mandarin type     |
| B065 | *      | Tsunokaori        | 315                 | 235   | 372   | 303   | 210     | 141     | 148     | 130                  | 269                 | 253             | 164   | C12     | 192            | Mandarin type     |
| B066 | *      | Tsunonozomi       | 315                 | 235   | 372   | 303   | 210     | 141     | 148     | 130                  | 269                 | 253             | 164   | C12     | 192            | Mandarin type     |
| B067 | *      | Willking          | 315                 | 235   | 372   | 303   | 210     | 141     | 148     | 130                  | 269                 | 253             | 164   | C12     | 192            | Mandarin type     |
| B068 | *      | Yellow Pummelo    | 315                 | 234   | 379   | 298   | 210     | 143     | 148     | 130                  | 274                 | 269             | 172   | C04     | 67             | pummelo type      |

|      |   |           |     |     |     |     |     |     |     |     |     |     |     |     |     |               |
|------|---|-----------|-----|-----|-----|-----|-----|-----|-----|-----|-----|-----|-----|-----|-----|---------------|
| B069 | * | Youkou    | 315 | 235 | 372 | 303 | 210 | 141 | 148 | 130 | 269 | 253 | 164 | C12 | 192 | Mandarin type |
| B070 | * | E-647     | 315 | 235 | 372 | 303 | 210 | 141 | 148 | 130 | 269 | 253 | 164 | C12 | 192 | Mandarin type |
| B071 | * | EnOw21    | 315 | 235 | 372 | 303 | 210 | 141 | 148 | 130 | 269 | 253 | 164 | C12 | 192 | Mandarin type |
| B072 | * | H-FD-1    | 315 | 234 | 379 | 298 | 210 | 143 | 148 | 130 | 274 | 269 | 172 | C04 | 67  | pummelo type  |
| B073 | * | HF9       | 315 | 235 | 372 | 303 | 210 | 141 | 148 | 130 | 269 | 253 | 164 | C12 | 192 | Mandarin type |
| B074 | * | KyOw14    | 315 | 235 | 372 | 303 | 210 | 141 | 148 | 130 | 269 | 253 | 164 | C12 | 192 | Mandarin type |
| B075 | * | KyOw21    | 315 | 235 | 372 | 303 | 210 | 141 | 148 | 130 | 269 | 253 | 164 | C12 | 192 | Mandarin type |
| B076 | * | No.1408   | 315 | 235 | 372 | 303 | 210 | 141 | 148 | 130 | 269 | 253 | 164 | C12 | 192 | Mandarin type |
| B077 | * | Okitsu-46 | 315 | 235 | 372 | 303 | 210 | 141 | 148 | 130 | 269 | 253 | 164 | C12 | 192 | Mandarin type |
| B078 | * | Okitsu-56 | 315 | 235 | 372 | 303 | 210 | 141 | 148 | 130 | 269 | 253 | 164 | C12 | 192 | Mandarin type |

C: Selected strains

| No.  | Rep 1) | Lines     | Chloroplast markers |       |       |       |         |         |         | Mitochondria markers |                |              | Class | Same GT | Organellar type |                 |
|------|--------|-----------|---------------------|-------|-------|-------|---------|---------|---------|----------------------|----------------|--------------|-------|---------|-----------------|-----------------|
|      |        |           | CSS03               | CSS04 | CSL01 | CSL09 | ccmp2.2 | ccmp6.2 | ccmp7.2 | ccmp10.2             | rm5/<br>rm18-1 | nad2/<br>4-3 |       |         |                 | nad7/<br>1-2    |
| C001 | *      | Strain 01 | 315                 | 235   | 372   | 303   | 210     | 141     | 148     | 130                  | 269            | 253          | 164   | C12     | 192             | Mandarin type   |
| C002 | *      | Strain 02 | 315                 | 235   | 372   | 303   | 210     | 141     | 148     | 130                  | 269            | 253          | 164   | C12     | 192             | Mandarin type   |
| C003 | *      | Strain 03 | 315                 | 235   | 372   | 303   | 210     | 141     | 148     | 130                  | 269            | 253          | 164   | C12     | 192             | Mandarin type   |
| C004 | *      | Strain 04 | 315                 | 233   | 377   | 305   | 210     | 141     | 148     | 130                  | 274            | 269          | 172   | C06     | 13              | Lemon type      |
| C005 | *      | Strain 05 | 315                 | 235   | 372   | 303   | 210     | 141     | 148     | 130                  | 269            | 253          | 164   | C12     | 192             | Mandarin type   |
| C006 | *      | Strain 06 | 315                 | 235   | 372   | 303   | 210     | 141     | 148     | 130                  | 269            | 253          | 164   | C12     | 192             | Mandarin type   |
| C007 | *      | Strain 07 | 315                 | 234   | 379   | 298   | 210     | 143     | 148     | 130                  | 274            | 269          | 172   | C04     | 67              | pummelo type    |
| C008 | *      | Strain 08 | 315                 | 235   | 372   | 303   | 210     | 141     | 148     | 130                  | 269            | 253          | 164   | C12     | 192             | Mandarin type   |
| C009 | *      | Strain 09 | 315                 | 235   | 372   | 303   | 210     | 141     | 148     | 130                  | 269            | 253          | 164   | C12     | 192             | Mandarin type   |
| C010 | *      | Strain 10 | 315                 | 235   | 372   | 303   | 210     | 141     | 148     | 130                  | 269            | 253          | 164   | C12     | 192             | Mandarin type   |
| C011 | *      | Strain 11 | 315                 | 235   | 372   | 303   | 210     | 141     | 148     | 130                  | 269            | 253          | 164   | C12     | 192             | Mandarin type   |
| C012 | *      | Strain 12 | 315                 | 235   | 372   | 303   | 210     | 141     | 148     | 130                  | 269            | 253          | 164   | C12     | 192             | Mandarin type   |
| C013 | *      | Strain 13 | 315                 | 235   | 372   | 303   | 210     | 141     | 148     | 130                  | 269            | 253          | 164   | C12     | 192             | Mandarin type   |
| C014 | *      | Strain 14 | 315                 | 235   | 372   | 303   | 210     | 141     | 148     | 130                  | 269            | 253          | 164   | C12     | 192             | Mandarin type   |
| C015 | *      | Strain 15 | 315                 | 235   | 372   | 303   | 210     | 141     | 148     | 130                  | 269            | 253          | 164   | C12     | 192             | Mandarin type   |
| C016 | *      | Strain 16 | 315                 | 234   | 379   | 298   | 210     | 143     | 148     | 130                  | 274            | 269          | 172   | C04     | 67              | pummelo type    |
| C017 | *      | Strain 17 | 315                 | 235   | 372   | 303   | 210     | 141     | 148     | 130                  | 269            | 253          | 164   | C12     | 192             | Mandarin type   |
| C018 | *      | Strain 18 | 315                 | 235   | 372   | 303   | 210     | 141     | 148     | 130                  | 269            | 253          | 164   | C12     | 192             | Mandarin type   |
| C019 | *      | Strain 19 | 315                 | 235   | 372   | 303   | 210     | 141     | 148     | 130                  | 269            | 253          | 164   | C12     | 192             | Mandarin type   |
| C020 | *      | Strain 20 | 315                 | 235   | 372   | 303   | 210     | 141     | 148     | 130                  | 269            | 253          | 164   | C12     | 192             | Mandarin type   |
| C021 | *      | Strain 21 | 315                 | 235   | 372   | 303   | 210     | 141     | 148     | 130                  | 269            | 253          | 164   | C12     | 192             | Mandarin type   |
| C022 | *      | Strain 22 | 315                 | 235   | 372   | 303   | 210     | 141     | 148     | 130                  | 269            | 253          | 164   | C12     | 192             | Mandarin type   |
| C023 | *      | Strain 23 | 315                 | 235   | 372   | 303   | 210     | 141     | 148     | 130                  | 269            | 253          | 164   | C12     | 192             | Mandarin type   |
| C024 | *      | Strain 24 | 315                 | 235   | 372   | 303   | 210     | 141     | 148     | 130                  | 269            | 253          | 164   | C12     | 192             | Mandarin type   |
| C025 | *      | Strain 25 | 315                 | 235   | 372   | 303   | 210     | 141     | 148     | 130                  | 269            | 253          | 164   | C12     | 192             | Mandarin type   |
| C026 | *      | Strain 26 | 315                 | 235   | 372   | 303   | 210     | 141     | 148     | 130                  | 269            | 253          | 164   | C12     | 192             | Mandarin type   |
| C027 | *      | Strain 27 | 315                 | 235   | 372   | 303   | 210     | 141     | 148     | 130                  | 269            | 253          | 164   | C12     | 192             | Mandarin type   |
| C028 | *      | Strain 28 | 315                 | 235   | 372   | 303   | 210     | 141     | 148     | 130                  | 269            | 253          | 164   | C12     | 192             | Mandarin type   |
| C029 | *      | Strain 29 | 315                 | 235   | 372   | 303   | 210     | 141     | 148     | 130                  | 269            | 253          | 164   | C12     | 192             | Mandarin type   |
| C030 | *      | Strain 30 | 315                 | 235   | 372   | 303   | 210     | 141     | 148     | 130                  | 269            | 253          | 164   | C12     | 192             | Mandarin type   |
| C031 | *      | Strain 31 | 315                 | 235   | 372   | 303   | 210     | 141     | 148     | 130                  | 269            | 253          | 164   | C12     | 192             | Mandarin type   |
| C032 | *      | Strain 32 | 315                 | 235   | 372   | 303   | 210     | 141     | 148     | 130                  | 269            | 253          | 164   | C12     | 192             | Mandarin type   |
| C033 | *      | Strain 33 | 315                 | 235   | 372   | 303   | 210     | 141     | 148     | 130                  | 269            | 253          | 164   | C12     | 192             | Mandarin type   |
| C034 | *      | Strain 34 | 315                 | 235   | 372   | 303   | 210     | 141     | 148     | 130                  | 269            | 253          | 164   | C12     | 192             | Mandarin type   |
| C035 | *      | Strain 35 | 315                 | 235   | 372   | 303   | 210     | 141     | 148     | 130                  | 269            | 253          | 164   | C12     | 192             | Mandarin type   |
| C036 | *      | Strain 36 | 315                 | 235   | 372   | 303   | 210     | 141     | 148     | 130                  | 269            | 253          | 164   | C12     | 192             | Mandarin type   |
| C037 | *      | Strain 37 | 315                 | 235   | 372   | 303   | 210     | 141     | 148     | 130                  | 269            | 253          | 164   | C12     | 192             | Mandarin type   |
| C038 | *      | Strain 38 | 315                 | 235   | 372   | 303   | 210     | 141     | 148     | 130                  | 269            | 253          | 164   | C12     | 192             | Mandarin type   |
| C039 | *      | Strain 39 | 315                 | 235   | 372   | 303   | 210     | 141     | 148     | 130                  | 269            | 253          | 164   | C12     | 192             | Mandarin type   |
| C040 | *      | Strain 40 | 315                 | 235   | 372   | 303   | 210     | 141     | 148     | 130                  | 269            | 253          | 164   | C12     | 192             | Mandarin type   |
| C041 | *      | Strain 41 | 315                 | 235   | 372   | 303   | 210     | 141     | 148     | 130                  | 269            | 253          | 164   | C12     | 192             | Mandarin type   |
| C042 | *      | Strain 42 | 315                 | 235   | 372   | 303   | 210     | 141     | 148     | 130                  | 269            | 253          | 164   | C12     | 192             | Mandarin type   |
| C043 | *      | Strain 43 | 315                 | 235   | 372   | 303   | 210     | 141     | 148     | 130                  | 269            | 253          | 164   | C12     | 192             | Mandarin type   |
| C044 | *      | Strain 44 | 315                 | 235   | 372   | 303   | 210     | 141     | 148     | 130                  | 269            | 253          | 164   | C12     | 192             | Mandarin type   |
| C045 | *      | Strain 45 | 315                 | 235   | 372   | 303   | 210     | 141     | 148     | 130                  | 269            | 253          | 164   | C12     | 192             | Mandarin type   |
| C046 | *      | Strain 46 | 315                 | 235   | 372   | 303   | 210     | 141     | 148     | 130                  | 269            | 253          | 164   | C12     | 192             | Mandarin type   |
| C047 | *      | Strain 47 | 315                 | 235   | 372   | 303   | 210     | 141     | 148     | 130                  | 269            | 253          | 164   | C12     | 192             | Mandarin type   |
| C048 | *      | Strain 48 | 315                 | 235   | 372   | 303   | 210     | 141     | 148     | 130                  | 269            | 253          | 164   | C12     | 192             | Mandarin type   |
| C049 | *      | Strain 49 | 315                 | 235   | 372   | 303   | 210     | 141     | 148     | 130                  | 269            | 253          | 164   | C12     | 192             | Mandarin type   |
| C050 | *      | Strain 50 | 315                 | 235   | 372   | 303   | 210     | 141     | 148     | 130                  | 269            | 253          | 164   | C12     | 192             | Mandarin type   |
| C051 | *      | Strain 51 | 315                 | 233   | 377   | 298   | 210     | 144     | 148     | 130                  | 274            | 269          | 172   | C05     | 17              | Hyuganatsu type |
| C052 | *      | Strain 52 | 315                 | 233   | 377   | 298   | 210     | 144     | 148     | 130                  | 274            | 269          | 172   | C05     | 17              | Hyuganatsu type |
| C053 | *      | Strain 53 | 315                 | 233   | 377   | 298   | 210     | 144     | 148     | 130                  | 274            | 269          | 172   | C05     | 17              | Hyuganatsu type |
| C054 | *      | Strain 54 | 315                 | 234   | 379   | 298   | 210     | 143     | 148     | 130                  | 274            | 269          | 172   | C04     | 67              | pummelo type    |
| C055 | *      | Strain 55 | 315                 | 235   | 372   | 303   | 210     | 141     | 148     | 130                  | 269            | 253          | 164   | C12     | 192             | Mandarin type   |
| C056 | *      | Strain 56 | 315                 | 235   | 372   | 303   | 210     | 141     | 148     | 130                  | 269            | 253          | 164   | C12     | 192             | Mandarin type   |

|      |   |           |     |     |     |     |     |     |     |     |     |     |     |     |     |               |
|------|---|-----------|-----|-----|-----|-----|-----|-----|-----|-----|-----|-----|-----|-----|-----|---------------|
| C057 | * | Strain 57 | 315 | 235 | 372 | 303 | 210 | 141 | 148 | 130 | 269 | 253 | 164 | C12 | 192 | Mandarin type |
| C058 | * | Strain 58 | 315 | 234 | 379 | 298 | 210 | 143 | 148 | 130 | 274 | 269 | 172 | C04 | 67  | pummelo type  |
| C059 | * | Strain 59 | 315 | 235 | 372 | 303 | 210 | 141 | 148 | 130 | 269 | 253 | 164 | C12 | 192 | Mandarin type |
| C060 | * | Strain 60 | 315 | 234 | 379 | 298 | 210 | 143 | 148 | 130 | 274 | 269 | 172 | C04 | 67  | pummelo type  |
| C061 | * | Strain 61 | 315 | 234 | 379 | 298 | 210 | 143 | 148 | 130 | 274 | 269 | 172 | C04 | 67  | pummelo type  |
| C062 | * | Strain 62 | 315 | 234 | 379 | 298 | 210 | 143 | 148 | 130 | 274 | 269 | 172 | C04 | 67  | pummelo type  |
| C063 | * | Strain 63 | 315 | 235 | 372 | 303 | 210 | 141 | 148 | 130 | 269 | 253 | 164 | C12 | 192 | Mandarin type |
| C064 | * | Strain 64 | 315 | 235 | 372 | 303 | 210 | 141 | 148 | 130 | 269 | 253 | 164 | C12 | 192 | Mandarin type |
| C065 | * | Strain 65 | 315 | 235 | 372 | 303 | 210 | 141 | 148 | 130 | 269 | 253 | 164 | C12 | 192 | Mandarin type |
| C066 | * | Strain 66 | 315 | 235 | 372 | 303 | 210 | 141 | 148 | 130 | 269 | 253 | 164 | C12 | 192 | Mandarin type |
| C067 | * | Strain 67 | 315 | 235 | 372 | 303 | 210 | 141 | 148 | 130 | 269 | 253 | 164 | C12 | 192 | Mandarin type |
| C068 | * | Strain 68 | 315 | 235 | 372 | 303 | 210 | 141 | 148 | 130 | 269 | 253 | 164 | C12 | 192 | Mandarin type |
| C069 | * | Strain 69 | 315 | 235 | 372 | 303 | 210 | 141 | 148 | 130 | 269 | 253 | 164 | C12 | 192 | Mandarin type |
| C070 | * | Strain 70 | 315 | 235 | 372 | 303 | 210 | 141 | 148 | 130 | 269 | 253 | 164 | C12 | 192 | Mandarin type |
| C071 | * | Strain 71 | 315 | 234 | 379 | 298 | 210 | 143 | 148 | 130 | 274 | 269 | 172 | C04 | 67  | pummelo type  |
| C072 | * | Strain 72 | 315 | 235 | 372 | 303 | 210 | 141 | 148 | 130 | 269 | 253 | 164 | C12 | 192 | Mandarin type |
| C073 | * | Strain 73 | 315 | 235 | 372 | 303 | 210 | 141 | 148 | 130 | 269 | 253 | 164 | C12 | 192 | Mandarin type |
| C074 | * | Strain 74 | 315 | 235 | 372 | 303 | 210 | 141 | 148 | 130 | 269 | 253 | 164 | C12 | 192 | Mandarin type |
| C075 | * | Strain 75 | 315 | 235 | 372 | 303 | 210 | 141 | 148 | 130 | 269 | 253 | 164 | C12 | 192 | Mandarin type |
| C076 | * | Strain 76 | 315 | 235 | 372 | 303 | 210 | 141 | 148 | 130 | 269 | 253 | 164 | C12 | 192 | Mandarin type |
| C077 | * | Strain 77 | 315 | 235 | 372 | 303 | 210 | 141 | 148 | 130 | 269 | 253 | 164 | C12 | 192 | Mandarin type |
| C078 | * | Strain 78 | 315 | 235 | 372 | 303 | 210 | 141 | 148 | 130 | 269 | 253 | 164 | C12 | 192 | Mandarin type |
| C079 | * | Strain 79 | 315 | 235 | 372 | 303 | 210 | 141 | 148 | 130 | 269 | 253 | 164 | C12 | 192 | Mandarin type |
| C080 | * | Strain 80 | 315 | 235 | 372 | 303 | 210 | 141 | 148 | 130 | 269 | 253 | 164 | C12 | 192 | Mandarin type |
| C081 | * | Strain 81 | 315 | 235 | 372 | 303 | 210 | 141 | 148 | 130 | 269 | 253 | 164 | C12 | 192 | Mandarin type |
| C082 | * | Strain 82 | 315 | 235 | 372 | 303 | 210 | 141 | 148 | 130 | 269 | 253 | 164 | C12 | 192 | Mandarin type |
| C083 | * | Strain 83 | 315 | 235 | 372 | 303 | 210 | 141 | 148 | 130 | 269 | 253 | 164 | C12 | 192 | Mandarin type |
| C084 | * | Strain 84 | 315 | 235 | 372 | 303 | 210 | 141 | 148 | 130 | 269 | 253 | 164 | C12 | 192 | Mandarin type |
| C085 | * | Strain 85 | 315 | 235 | 372 | 303 | 210 | 141 | 148 | 130 | 269 | 253 | 164 | C12 | 192 | Mandarin type |

D. Numbers of mismatched genotypes between all pairs of cytotype classes

| Class | Cytotypes           | Classes |     |     |     |     |     |     |     |     |     |     |     |     |     |     |     |     |     |
|-------|---------------------|---------|-----|-----|-----|-----|-----|-----|-----|-----|-----|-----|-----|-----|-----|-----|-----|-----|-----|
|       |                     | C01     | C02 | C03 | C04 | C05 | C06 | C07 | C08 | C09 | C10 | C11 | C12 | C13 | C14 | C15 | C16 | C17 | C18 |
| C01   | C. ichangensis type | 0       | 7   | 9   | 8   | 8   | 8   | 8   | 8   | 4   | 8   | 11  | 10  | 9   | 11  | 8   | 11  | 9   | 8   |
| C02   | Mexican lime        | 7       | 0   | 6   | 5   | 5   | 4   | 5   | 5   | 6   | 5   | 8   | 8   | 6   | 8   | 6   | 9   | 7   | 6   |
| C03   | Limonia type        | 9       | 6   | 0   | 7   | 6   | 5   | 6   | 6   | 7   | 6   | 4   | 4   | 2   | 5   | 3   | 6   | 1   | 6   |
| C04   | pummelo type        | 8       | 5   | 7   | 0   | 3   | 4   | 2   | 3   | 7   | 3   | 8   | 7   | 7   | 8   | 6   | 7   | 6   | 3   |
| C05   | Hyuganatsu type     | 8       | 5   | 6   | 3   | 0   | 2   | 1   | 2   | 6   | 1   | 7   | 7   | 7   | 7   | 8   | 7   | 4   | 4   |
| C06   | Lemon type          | 8       | 4   | 5   | 4   | 2   | 0   | 2   | 2   | 6   | 2   | 6   | 6   | 5   | 7   | 5   | 8   | 6   | 4   |
| C07   | Sweet orange type   | 8       | 5   | 6   | 2   | 1   | 2   | 0   | 1   | 6   | 1   | 7   | 7   | 7   | 7   | 8   | 7   | 4   | 4   |
| C08   | Satsumakikoku type  | 8       | 5   | 6   | 3   | 2   | 2   | 1   | 0   | 6   | 2   | 7   | 7   | 7   | 7   | 8   | 7   | 4   | 4   |
| C09   | Yuzu type           | 4       | 6   | 7   | 7   | 6   | 6   | 6   | 6   | 0   | 6   | 9   | 9   | 8   | 9   | 7   | 10  | 8   | 7   |
| C10   | Ichang lemon type   | 8       | 5   | 6   | 3   | 1   | 2   | 1   | 2   | 6   | 0   | 7   | 7   | 7   | 7   | 8   | 7   | 4   | 4   |
| C11   | Kunenbo_B type      | 11      | 8   | 4   | 8   | 7   | 6   | 7   | 7   | 9   | 7   | 0   | 4   | 5   | 1   | 5   | 2   | 5   | 8   |
| C12   | Mandarin type       | 10      | 8   | 4   | 7   | 7   | 6   | 7   | 7   | 9   | 7   | 4   | 0   | 3   | 5   | 4   | 5   | 4   | 7   |
| C13   | Sunki type          | 9       | 6   | 2   | 7   | 7   | 5   | 7   | 7   | 8   | 7   | 5   | 3   | 0   | 6   | 2   | 6   | 2   | 7   |
| C14   | Tachibana type      | 11      | 8   | 5   | 8   | 7   | 7   | 7   | 7   | 9   | 7   | 1   | 5   | 6   | 0   | 6   | 1   | 6   | 7   |
| C15   | Tachibana C type    | 8       | 6   | 3   | 6   | 7   | 5   | 7   | 7   | 7   | 7   | 5   | 4   | 2   | 6   | 0   | 5   | 2   | 6   |
| C16   | Ogimikugani type    | 11      | 9   | 6   | 7   | 8   | 8   | 8   | 8   | 10  | 8   | 2   | 5   | 6   | 1   | 5   | 0   | 5   | 6   |
| C17   | Cleopatra type      | 9       | 7   | 1   | 6   | 7   | 6   | 7   | 7   | 8   | 7   | 5   | 4   | 2   | 6   | 2   | 5   | 0   | 5   |
| C18   | Koji type           | 8       | 6   | 6   | 3   | 4   | 4   | 4   | 4   | 7   | 4   | 8   | 7   | 7   | 7   | 6   | 6   | 5   | 0   |
