# Supplementary material for: Hybrid Origins of Citrus Varieties Inferred from DNA Marker Analysis of Nuclear and Organelle Genomes
Source: PubMed Central journal article supplement (PMC5130255; doi:10.1371/journal.pone.0166969), 2016-11-30
Supplement: pone.0166969.s013.pdf [file pone.0166969.s013.pdf]

S10 Table. Numbers of DNA markers that inconsistent on allele sharing test between all combinations of representative native varieties

| Inferred combinations by allele sharing test |      |                      |          |          |          |          |            |          |          |            |           |                |      |       |              |              |          |           |           |            |        |         |             |         |               |                      |         |            |           |              |      |        |       |        |         |    |
|----------------------------------------------|------|----------------------|----------|----------|----------|----------|------------|----------|----------|------------|-----------|----------------|------|-------|--------------|--------------|----------|-----------|-----------|------------|--------|---------|-------------|---------|---------------|----------------------|---------|------------|-----------|--------------|------|--------|-------|--------|---------|----|
| No unshared alleles                          | 74   | 3                    | 0        | 1        | 0        | 2        | 1          | 0        | 2        | 1          | 2         | 0              | 2    | 0     | 2            | 1            | 1        | 0         | 1         | 1          | 1      | 1       | 1           | 0       | 1             | 1                    | 1       | 0          | 0         | 2            | 0    | 1      | 1     | 2      |         |    |
| Up to 4 unshared alleles allowed             | 92   | 8                    | 1        | 4        | 0        | 5        | 2          | 0        | 5        | 1          | 6         | 0              | 3    | 0     | 7            | 3            | 3        | 4         | 4         | 3          | 6      | 3       | 2           | 1       | 1             | 5                    | 1       | 1          | 1         | 8            | 2    | 1      | 3     | 4      |         |    |
|                                              |      | Variety              | Andoukan | Anseikan | Asahikan | Banpeiyu | Ben Di Zao | Bergamot | Binkitsu | Clementine | Cleopatra | Cravo mandarin | Dada | Dancy | Egami buntan | Fukure mikan | Funadoko | Genshokan | Girimikan | Grapefruit | Hanayu | Hassaku | Henka mikan | Hickson | Hirado buntan | Hiroshimanatsubuntan | Hyoukan | Hyuganatsu | Ichanchii | Ichang lemon | Iyo  | Jabara | Jabon | Kabusu | Kabuchi |    |
|                                              |      | ID                   | A001     | A002     | A003     | A004     | A005       | A006     | A008     | A009       | A013      | A014           | A015 | A016  | A018         | A019         | A021     | A022      | A023      | A024       | A027   | A028    | A030        | A031    | A032          | A033                 | A035    | A036       | A041      | A042         | A044 | A045   | A046  | A047   | A048    |    |
| No                                           | ID   | Variety              | ND       | 0        | 0        | 0        | 0          | 0        | 0        | 0          | 0         | 0              | 0    | 0     | 1            | 0            | 0        | 0         | 0         | 0          | 2      | 0       | 0           | 0       | 0             | 0                    | 0       | 0          | 0         | 0            | 0    | 2      | 0     | 0      | 0       |    |
| 1                                            | A001 | Andoukan             | 0        | 0        | 10       | 5        | 10         | 11       | 14       | 13         | 17        | 14             | 11   | 12    | 11           | 24           | 8        | 6         | 13        | 11         | 7      | 26      | 8           | 11      | 14            | 14                   | 7       | 7          | 11        | 25           | 17   | 3      | 15    | 10     | 11      | 12 |
| 2                                            | A002 | Anseikan             | 0        | 10       | 0        | 13       | 6          | 47       | 29       | 31         | 54        | 58             | 45   | 15    | 54           | 18           | 48       | 20        | 59        | 41         | 6      | 59      | 3           | 41      | 51            | 12                   | 11      | 11         | 14        | 39           | 22   | 19     | 28    | 21     | 41      | 25 |
| 3                                            | A003 | Asahikan             | 0        | 5        | 13       | 0        | 9          | 15       | 21       | 22         | 21        | 23             | 14   | 13    | 24           | 16           | 18       | 7         | 24        | 16         | 6      | 44      | 9           | 17      | 23            | 11                   | 8       | 6          | 15        | 30           | 19   | 6      | 18    | 9      | 14      | 9  |
| 4                                            | A004 | Banpeiyu             | 0        | 10       | 6        | 9        | 0          | 68       | 33       | 45         | 66        | 75             | 63   | 29    | 72           | 12           | 60       | 29        | 72        | 51         | 8      | 70      | 9           | 54      | 69            | 8                    | 15      | 14         | 30        | 54           | 23   | 24     | 44    | 26     | 49      | 46 |
| 5                                            | A005 | Ben Di Zao           | 0        | 11       | 47       | 15       | 68         | 0        | 32       | 14         | 6         | 11             | 10   | 27    | 5            | 71           | 7        | 0         | 8         | 12         | 26     | 34      | 17          | 11      | 10            | 70                   | 26      | 18         | 24        | 40           | 40   | 8      | 26    | 20     | 10      | 17 |
| 6                                            | A006 | Bergamot             | 0        | 14       | 29       | 21       | 33         | 32       | 0        | 26         | 38        | 34             | 33   | 21    | 40           | 35           | 30       | 25        | 36        | 24         | 14     | 38      | 26          | 32      | 40            | 34                   | 18      | 18         | 22        | 12           | 16   | 23     | 32    | 22     | 26      | 32 |
| 7                                            | A008 | Binkitsu             | 0        | 13       | 31       | 22       | 45         | 14       | 26       | 0          | 17        | 24             | 19   | 21    | 20           | 50           | 8        | 15        | 22        | 13         | 18     | 23      | 10          | 12      | 19            | 44                   | 27      | 5          | 13        | 34           | 21   | 10     | 14    | 18     | 14      | 13 |
| 8                                            | A009 | Clementine           | 0        | 17       | 54       | 21       | 66         | 6        | 38       | 17         | 0         | 15             | 1    | 26    | 10           | 73           | 13       | 15        | 9         | 17         | 19     | 38      | 26          | 18      | 13            | 65                   | 33      | 22         | 30        | 44           | 45   | 12     | 26    | 31     | 19      | 26 |
| 9                                            | A013 | Cleopatra            | 0        | 14       | 58       | 23       | 75         | 11       | 34       | 24         | 15        | 0              | 13   | 29    | 13           | 80           | 10       | 24        | 13        | 17         | 35     | 33      | 30          | 18      | 12            | 77                   | 39      | 28         | 25        | 41           | 49   | 16     | 30    | 31     | 26      | 24 |
| 10                                           | A014 | Cravo mandarin       | 0        | 11       | 45       | 14       | 63         | 10       | 33       | 19         | 1         | 13             | 0    | 23    | 9            | 64           | 13       | 17        | 7         | 15         | 15     | 37      | 19          | 14      | 3             | 62                   | 25      | 19         | 25        | 42           | 42   | 9      | 29    | 26     | 18      | 24 |
| 11                                           | A015 | Dada                 | 0        | 12       | 15       | 13       | 29         | 27       | 21       | 21         | 26        | 29             | 23   | 0     | 29           | 25           | 11       | 15        | 28        | 16         | 11     | 19      | 9           | 24      | 28            | 23                   | 12      | 14         | 18        | 26           | 21   | 13     | 23    | 13     | 21      | 11 |
| 12                                           | A016 | Dancy                | 0        | 11       | 54       | 24       | 72         | 5        | 40       | 20         | 10        | 13             | 9    | 29    | 0            | 78           | 11       | 15        | 7         | 12         | 25     | 37      | 23          | 16      | 5             | 72                   | 38      | 23         | 29        | 46           | 52   | 0      | 30    | 33     | 18      | 27 |
| 13                                           | A018 | Egami buntan         | 1        | 24       | 18       | 16       | 12         | 71       | 35       | 50         | 73        | 80             | 64   | 25    | 78           | 1            | 67       | 33        | 74        | 60         | 16     | 70      | 20          | 59      | 74            | 13                   | 16      | 23         | 33        | 54           | 26   | 37     | 44    | 36     | 54      | 49 |
| 14                                           | A019 | Fukure mikan         | 0        | 8        | 48       | 18       | 60         | 7        | 30       | 8          | 13        | 10             | 13   | 11    | 11           | 67           | 0        | 16        | 13        | 2          | 27     | 16      | 19          | 9       | 12            | 61                   | 28      | 17         | 13        | 33           | 35   | 11     | 24    | 18     | 13      | 10 |
| 15                                           | A021 | Funadoko             | 0        | 6        | 20       | 7        | 29         | 0        | 25       | 15         | 15        | 24             | 17   | 15    | 15           | 33           | 16       | 0         | 20        | 16         | 9      | 38      | 7           | 14      | 19            | 32                   | 12      | 8          | 16        | 39           | 22   | 6      | 19    | 13     | 8       | 12 |
| 16                                           | A022 | Genshokan            | 0        | 13       | 59       | 24       | 72         | 8        | 36       | 22         | 9         | 13             | 7    | 28    | 7            | 74           | 13       | 20        | 0         | 18         | 28     | 34      | 26          | 13      | 6             | 69                   | 40      | 19         | 22        | 41           | 50   | 8      | 32    | 28     | 22      | 25 |
| 17                                           | A023 | Girimikan            | 0        | 11       | 41       | 16       | 51         | 12       | 24       | 13         | 17        | 17             | 15   | 16    | 12           | 60           | 2        | 16        | 18        | 0          | 24     | 12      | 23          | 11      | 13            | 53                   | 29      | 13         | 7         | 29           | 29   | 15     | 20    | 17     | 15      | 8  |
| 18                                           | A024 | Grapefruit           | 0        | 7        | 6        | 6        | 8          | 26       | 14       | 18         | 19        | 35             | 15   | 11    | 25           | 16           | 27       | 9         | 28        | 24         | 0      | 42      | 8           | 24      | 21            | 13                   | 10      | 5          | 14        | 30           | 13   | 12     | 22    | 11     | 15      | 24 |
| 19                                           | A027 | Hanayu               | 2        | 26       | 59       | 44       | 70         | 34       | 38       | 23         | 38        | 33             | 37   | 19    | 37           | 70           | 16       | 38        | 34        | 12         | 42     | 0       | 42          | 18      | 34            | 72                   | 48      | 37         | 16        | 29           | 22   | 34     | 19    | 21     | 17      | 19 |
| 20                                           | A028 | Hassaku              | 0        | 8        | 3        | 9        | 9          | 17       | 26       | 10         | 26        | 30             | 19   | 9     | 23           | 20           | 19       | 7         | 26        | 23         | 8      | 42      | 0           | 15      | 25            | 12                   | 11      | 7          | 9         | 39           | 19   | 4      | 19    | 14     | 21      | 14 |
| 21                                           | A030 | Henka mikan          | 0        | 11       | 41       | 17       | 54         | 11       | 32       | 12         | 18        | 18             | 14   | 24    | 16           | 59           | 9        | 14        | 13        | 11         | 24     | 18      | 15          | 0       | 14            | 52                   | 26      | 6          | 18        | 27           | 20   | 12     | 18    | 13     | 11      | 24 |
| 22                                           | A031 | Hickson              | 0        | 14       | 51       | 23       | 69         | 10       | 40       | 19         | 13        | 12             | 3    | 28    | 5            | 74           | 12       | 19        | 6         | 13         | 21     | 34      | 25          | 14      | 0             | 68                   | 33      | 18         | 29        | 44           | 48   | 5      | 26    | 31     | 21      | 25 |
| 23                                           | A032 | Hirado buntan        | 0        | 14       | 12       | 11       | 8          | 70       | 34       | 44         | 65        | 77             | 62   | 23    | 72           | 13           | 61       | 32        | 69        | 53         | 13     | 72      | 12          | 52      | 68            | 0                    | 12      | 17         | 29        | 54           | 25   | 27     | 42    | 31     | 51      | 44 |
| 24                                           | A033 | Hiroshimanatsubuntan | 0        | 7        | 11       | 8        | 15         | 26       | 18       | 27         | 33        | 39             | 25   | 12    | 38           | 16           | 28       | 12        | 40        | 29         | 10     | 48      | 11          | 26      | 33            | 12                   | 0       | 15         | 10        | 29           | 17   | 12     | 23    | 15     | 27      | 19 |
| 25                                           | A035 | Hyoukan              | 0        | 7        | 11       | 6        | 14         | 18       | 18       | 5          | 22        | 28             | 19   | 14    | 23           | 23           | 17       | 8         | 19        | 13         | 5      | 37      | 7           | 6       | 18            | 17                   | 15      | 0          | 9         | 32           | 13   | 11     | 14    | 6      | 14      | 14 |
| 26                                           | A036 | Hyuganatsu           | 0        | 11       | 14       | 15       | 30         | 24       | 22       | 13         | 30        | 25             | 25   | 18    | 29           | 33           | 13       | 16        | 22        | 7          | 14     | 16      | 9           | 18      | 29            | 29                   | 10      | 9          | 0         | 28           | 25   | 13     | 17    | 16     | 22      | 11 |
| 27                                           | A041 | Ichanchii            | 0        | 25       | 39       | 30       | 54         | 40       | 12       | 34         | 44        | 41             | 42   | 26    | 46           | 54           | 33       | 39        | 41        | 29         | 30     | 29      | 39          | 27      | 44            | 54                   | 29      | 32         | 28        | 0            | 20   | 31     | 25    | 25     | 23      | 33 |
| 28                                           | A042 | Ichang lemon         | 0        | 17       | 22       | 19       | 23         | 40       | 16       | 21         | 45        | 49             | 42   | 21    | 52           | 26           | 35       | 22        | 50        | 29         | 13     | 22      | 19          | 20      | 48            | 25                   | 17      | 13         | 25        | 20           | 0    | 24     | 16    | 19     | 8       | 31 |
| 29                                           | A044 | Iyo                  | 0        | 3        | 19       | 6        | 24         | 8        | 23       | 10         | 12        | 16             | 9    | 13    | 0            | 37           | 11       | 6         | 8         | 15         | 12     | 34      | 4           | 12      | 5             | 27                   | 12      | 11         | 13        | 31           | 24   | 0      | 14    | 15     | 10      | 10 |
| 30                                           | A045 | Jabara               | 2        | 15       | 28       | 18       | 44         | 26       | 32       | 14         | 26        | 30             | 29   | 23    | 30           | 44           | 24       | 19        | 32        | 20         | 22     | 19      | 19          | 18      | 26            | 42                   | 23      | 14         | 17        | 25           | 16   | 14     | 2     | 19     | 12      | 20 |
| 31                                           | A046 | Jabon                | 0        | 10       | 21       | 9        | 26         | 20       | 22       | 18         | 31        | 31             | 26   | 13    | 33           | 36           | 18       | 13        | 28        | 17         | 11     | 21      | 14          | 13      | 31            | 31                   | 15      | 6          | 16        | 25           | 19   | 15     | 19    | 0      | 10      | 14 |

|    |      |                         |   |    |    |    |    |    |    |    |    |    |    |    |    |    |    |    |    |    |    |    |    |    |    |    |    |    |    |    |    |    |    |    |    |    |
|----|------|-------------------------|---|----|----|----|----|----|----|----|----|----|----|----|----|----|----|----|----|----|----|----|----|----|----|----|----|----|----|----|----|----|----|----|----|----|
| 32 | A047 | Kabosu                  | 0 | 11 | 41 | 14 | 49 | 10 | 26 | 14 | 19 | 26 | 18 | 21 | 18 | 54 | 13 | 8  | 22 | 15 | 15 | 17 | 21 | 11 | 21 | 51 | 27 | 14 | 22 | 23 | 8  | 10 | 12 | 10 | 0  | 21 |
| 33 | A048 | Kabuchi                 | 0 | 12 | 25 | 9  | 46 | 17 | 32 | 13 | 26 | 24 | 24 | 11 | 27 | 49 | 10 | 12 | 25 | 8  | 24 | 19 | 14 | 24 | 25 | 44 | 19 | 14 | 11 | 33 | 31 | 10 | 20 | 14 | 21 | 0  |
| 34 | A049 | Kaikoukan               | 0 | 0  | 10 | 4  | 7  | 30 | 27 | 27 | 39 | 42 | 31 | 11 | 41 | 17 | 29 | 7  | 39 | 35 | 6  | 53 | 4  | 29 | 40 | 10 | 9  | 10 | 9  | 38 | 19 | 0  | 21 | 16 | 25 | 4  |
| 35 | A050 | Kawabata                | 0 | 13 | 26 | 9  | 40 | 12 | 31 | 9  | 28 | 22 | 23 | 16 | 19 | 41 | 8  | 10 | 19 | 10 | 17 | 29 | 4  | 13 | 23 | 38 | 21 | 12 | 8  | 36 | 29 | 7  | 20 | 15 | 16 | 6  |
| 36 | A051 | Kawachi bankan          | 0 | 8  | 8  | 12 | 13 | 30 | 23 | 23 | 35 | 38 | 29 | 18 | 39 | 17 | 26 | 18 | 37 | 25 | 8  | 42 | 11 | 21 | 36 | 10 | 8  | 8  | 14 | 36 | 21 | 18 | 23 | 14 | 29 | 20 |
| 37 | A052 | Keraji                  | 0 | 13 | 37 | 9  | 52 | 17 | 41 | 10 | 22 | 26 | 20 | 15 | 18 | 58 | 7  | 15 | 20 | 10 | 23 | 24 | 10 | 10 | 20 | 53 | 27 | 9  | 10 | 41 | 33 | 14 | 24 | 18 | 19 | 0  |
| 38 | A053 | Kikudaidai              | 0 | 9  | 20 | 16 | 25 | 31 | 27 | 26 | 38 | 34 | 36 | 14 | 33 | 30 | 20 | 17 | 33 | 18 | 18 | 1  | 13 | 27 | 38 | 24 | 13 | 17 | 14 | 33 | 21 | 10 | 21 | 15 | 20 | 19 |
| 39 | A054 | King mandarin           | 0 | 11 | 41 | 11 | 51 | 13 | 34 | 10 | 19 | 18 | 15 | 21 | 18 | 57 | 15 | 14 | 11 | 10 | 17 | 28 | 15 | 12 | 16 | 51 | 25 | 11 | 19 | 35 | 32 | 10 | 31 | 22 | 19 | 15 |
| 40 | A055 | Kinkoji                 | 0 | 10 | 16 | 11 | 21 | 26 | 27 | 13 | 32 | 33 | 29 | 12 | 31 | 21 | 21 | 12 | 29 | 33 | 13 | 46 | 6  | 18 | 34 | 20 | 16 | 7  | 8  | 44 | 23 | 7  | 20 | 18 | 23 | 8  |
| 41 | A059 | Kishu mandarin          | 0 | 0  | 52 | 14 | 70 | 6  | 34 | 14 | 7  | 10 | 9  | 26 | 7  | 76 | 0  | 17 | 8  | 10 | 28 | 28 | 23 | 3  | 6  | 69 | 32 | 13 | 25 | 39 | 44 | 8  | 27 | 21 | 13 | 21 |
| 42 | A073 | Kizu                    | 0 | 15 | 37 | 15 | 54 | 13 | 35 | 10 | 22 | 23 | 22 | 24 | 18 | 51 | 17 | 10 | 21 | 19 | 23 | 16 | 16 | 12 | 19 | 49 | 31 | 10 | 15 | 19 | 8  | 9  | 8  | 16 | 5  | 10 |
| 43 | A075 | Kobeni mikan            | 0 | 14 | 57 | 26 | 75 | 3  | 36 | 16 | 16 | 12 | 14 | 32 | 9  | 80 | 10 | 20 | 13 | 12 | 30 | 38 | 29 | 15 | 14 | 75 | 33 | 21 | 26 | 43 | 45 | 18 | 29 | 33 | 16 | 25 |
| 44 | A076 | Koji                    | 0 | 16 | 42 | 22 | 54 | 10 | 29 | 8  | 14 | 14 | 13 | 12 | 14 | 63 | 0  | 19 | 20 | 3  | 28 | 14 | 23 | 19 | 16 | 56 | 30 | 27 | 14 | 34 | 35 | 16 | 19 | 22 | 17 | 13 |
| 45 | A079 | Kourai Tachibana        | 1 | 25 | 60 | 37 | 63 | 25 | 33 | 23 | 29 | 24 | 29 | 25 | 28 | 63 | 17 | 30 | 21 | 13 | 33 | 5  | 36 | 19 | 33 | 67 | 39 | 37 | 16 | 29 | 25 | 29 | 18 | 18 | 24 | 28 |
| 46 | A080 | Kotokan                 | 0 | 5  | 19 | 8  | 20 | 9  | 15 | 11 | 17 | 14 | 16 | 11 | 9  | 30 | 10 | 13 | 7  | 13 | 9  | 27 | 9  | 11 | 7  | 19 | 15 | 7  | 14 | 25 | 19 | 6  | 12 | 12 | 11 | 13 |
| 47 | A081 | Kunenbo-A               | 0 | 8  | 13 | 0  | 36 | 4  | 26 | 7  | 8  | 10 | 7  | 14 | 9  | 39 | 3  | 3  | 7  | 8  | 5  | 33 | 0  | 0  | 8  | 33 | 13 | 0  | 10 | 34 | 23 | 3  | 2  | 12 | 0  | 0  |
| 48 | A082 | Kunenbo-B               | 0 | 11 | 40 | 20 | 57 | 14 | 16 | 12 | 23 | 16 | 21 | 8  | 22 | 60 | 7  | 13 | 16 | 5  | 22 | 10 | 26 | 15 | 21 | 60 | 21 | 15 | 10 | 30 | 29 | 19 | 27 | 15 | 16 | 7  |
| 49 | A085 | Lemon                   | 0 | 22 | 34 | 28 | 46 | 29 | 4  | 29 | 34 | 32 | 35 | 24 | 40 | 50 | 29 | 29 | 38 | 21 | 23 | 37 | 30 | 31 | 38 | 48 | 18 | 25 | 22 | 1  | 23 | 28 | 27 | 29 | 30 | 34 |
| 50 | A086 | Lemonade                | 0 | 15 | 29 | 22 | 42 | 26 | 19 | 26 | 30 | 25 | 18 | 19 | 26 | 48 | 20 | 23 | 24 | 22 | 22 | 37 | 28 | 22 | 21 | 39 | 16 | 24 | 20 | 19 | 28 | 16 | 25 | 25 | 22 | 21 |
| 51 | A087 | Limonia                 | 0 | 24 | 52 | 37 | 62 | 21 | 19 | 24 | 25 | 14 | 27 | 27 | 23 | 67 | 19 | 30 | 26 | 19 | 35 | 31 | 37 | 24 | 24 | 63 | 36 | 30 | 25 | 21 | 38 | 23 | 33 | 31 | 25 | 29 |
| 52 | A088 | Mato buntan             | 0 | 18 | 10 | 13 | 10 | 67 | 32 | 42 | 69 | 79 | 61 | 16 | 74 | 13 | 62 | 27 | 75 | 56 | 16 | 72 | 12 | 54 | 71 | 7  | 15 | 19 | 28 | 54 | 19 | 29 | 42 | 29 | 49 | 45 |
| 53 | A089 | Mexican lime            | 1 | 43 | 56 | 47 | 61 | 54 | 32 | 44 | 58 | 57 | 60 | 49 | 60 | 65 | 49 | 48 | 60 | 43 | 49 | 38 | 52 | 40 | 61 | 62 | 50 | 43 | 44 | 25 | 35 | 49 | 42 | 40 | 41 | 50 |
| 54 | A090 | Meyer lemon             | 0 | 17 | 40 | 25 | 51 | 21 | 25 | 24 | 24 | 27 | 27 | 28 | 24 | 60 | 20 | 19 | 25 | 26 | 26 | 33 | 28 | 24 | 22 | 51 | 31 | 19 | 21 | 22 | 30 | 15 | 30 | 26 | 21 | 22 |
| 55 | A091 | Mochiyu                 | 0 | 11 | 39 | 11 | 49 | 11 | 29 | 16 | 19 | 24 | 12 | 20 | 20 | 51 | 17 | 14 | 23 | 16 | 20 | 18 | 11 | 13 | 21 | 50 | 19 | 14 | 14 | 25 | 13 | 8  | 16 | 9  | 4  | 17 |
| 56 | A092 | Murcott                 | 0 | 10 | 42 | 22 | 61 | 10 | 34 | 12 | 13 | 12 | 10 | 28 | 3  | 68 | 12 | 13 | 10 | 10 | 18 | 34 | 16 | 18 | 7  | 58 | 29 | 14 | 26 | 39 | 37 | 9  | 29 | 32 | 17 | 21 |
| 57 | A095 | Naruto                  | 0 | 5  | 8  | 5  | 9  | 10 | 20 | 14 | 18 | 20 | 13 | 10 | 16 | 17 | 8  | 9  | 15 | 9  | 4  | 30 | 5  | 13 | 18 | 12 | 6  | 5  | 19 | 27 | 17 | 9  | 18 | 9  | 12 | 17 |
| 58 | A098 | Natsudaidai             | 0 | 6  | 11 | 9  | 17 | 7  | 18 | 9  | 15 | 12 | 10 | 15 | 7  | 25 | 5  | 9  | 10 | 8  | 7  | 27 | 9  | 7  | 10 | 12 | 6  | 3  | 15 | 27 | 14 | 4  | 11 | 10 | 8  | 11 |
| 59 | A100 | Nidonari mikan          | 0 | 7  | 38 | 15 | 56 | 12 | 20 | 22 | 13 | 15 | 12 | 25 | 12 | 59 | 10 | 18 | 14 | 19 | 19 | 36 | 22 | 13 | 11 | 57 | 18 | 17 | 21 | 38 | 36 | 9  | 17 | 26 | 20 | 20 |
| 60 | A101 | Ogonkan                 | 0 | 7  | 26 | 16 | 37 | 13 | 20 | 13 | 24 | 19 | 18 | 17 | 20 | 37 | 10 | 13 | 20 | 10 | 12 | 26 | 13 | 21 | 23 | 34 | 16 | 12 | 15 | 28 | 30 | 11 | 26 | 19 | 15 | 18 |
| 61 | A103 | Otoutkan                | 0 | 11 | 25 | 10 | 21 | 0  | 23 | 13 | 15 | 25 | 16 | 18 | 18 | 33 | 15 | 2  | 18 | 21 | 11 | 40 | 12 | 15 | 23 | 23 | 13 | 10 | 16 | 31 | 19 | 8  | 20 | 13 | 9  | 16 |
| 62 | A104 | Oukan                   | 0 | 8  | 24 | 5  | 26 | 10 | 24 | 16 | 17 | 14 | 15 | 17 | 12 | 39 | 8  | 8  | 14 | 13 | 14 | 33 | 14 | 10 | 15 | 28 | 14 | 9  | 19 | 31 | 29 | 7  | 19 | 12 | 11 | 17 |
| 63 | A107 | Ponkan                  | 0 | 13 | 49 | 17 | 67 | 3  | 37 | 12 | 4  | 10 | 3  | 27 | 0  | 72 | 11 | 11 | 4  | 11 | 18 | 31 | 18 | 11 | 0  | 66 | 33 | 14 | 27 | 39 | 44 | 1  | 24 | 27 | 11 | 19 |
| 64 | A109 | Ponkitsu                | 0 | 16 | 55 | 32 | 68 | 15 | 44 | 21 | 14 | 16 | 14 | 27 | 11 | 72 | 15 | 23 | 5  | 20 | 21 | 35 | 31 | 16 | 13 | 70 | 44 | 20 | 25 | 43 | 51 | 13 | 28 | 34 | 27 | 28 |
| 65 | A110 | Pummelo whitype         | 1 | 17 | 13 | 19 | 10 | 72 | 36 | 45 | 72 | 78 | 64 | 27 | 76 | 20 | 66 | 31 | 74 | 62 | 16 | 74 | 13 | 58 | 72 | 7  | 15 | 20 | 29 | 55 | 32 | 27 | 48 | 29 | 58 | 46 |
| 66 | A111 | Rokugatsumikan          | 0 | 13 | 36 | 18 | 48 | 19 | 12 | 14 | 25 | 22 | 21 | 8  | 30 | 54 | 7  | 18 | 26 | 7  | 17 | 14 | 22 | 19 | 28 | 51 | 21 | 14 | 11 | 27 | 24 | 21 | 24 | 14 | 16 | 9  |
| 67 | A112 | Sanbokan                | 0 | 1  | 13 | 6  | 18 | 9  | 20 | 12 | 18 | 19 | 18 | 16 | 21 | 31 | 8  | 6  | 16 | 17 | 5  | 30 | 11 | 9  | 16 | 16 | 8  | 6  | 12 | 24 | 19 | 5  | 17 | 10 | 12 | 10 |
| 68 | A125 | Satsuma mandarin        | 0 | 2  | 27 | 10 | 46 | 9  | 30 | 13 | 13 | 13 | 8  | 18 | 15 | 48 | 6  | 13 | 12 | 16 | 15 | 34 | 10 | 9  | 14 | 42 | 19 | 8  | 14 | 39 | 34 | 11 | 17 | 21 | 14 | 16 |
| 69 | A134 | Satsuma Kikoku          | 0 | 7  | 17 | 13 | 18 | 17 | 17 | 12 | 26 | 18 | 22 | 17 | 23 | 24 | 17 | 18 | 15 | 15 | 8  | 30 | 12 | 22 | 24 | 27 | 15 | 11 | 15 | 26 | 18 | 11 | 21 | 10 | 21 | 18 |
| 70 | A135 | Shiikuwasha             | 0 | 13 | 51 | 26 | 69 | 12 | 30 | 16 | 15 | 9  | 14 | 7  | 14 | 75 | 6  | 18 | 13 | 7  | 30 | 16 | 31 | 15 | 16 | 72 | 34 | 24 | 13 | 32 | 39 | 14 | 29 | 20 | 19 | 6  |
| 71 | A136 | Shiikuwasha_Ogimikugani | 0 | 13 | 53 | 24 | 67 | 13 | 33 | 13 | 21 | 10 | 18 | 9  | 16 | 76 | 5  | 20 | 15 | 4  | 31 | 12 | 30 | 14 | 14 | 72 | 35 | 23 | 10 | 33 | 39 | 15 | 32 | 19 | 16 | 5  |
| 72 | A137 | Shunkokan               | 0 | 8  | 11 | 11 | 26 | 14 | 25 | 14 | 20 | 21 | 14 | 14 | 15 | 31 | 7  | 9  | 18 | 19 | 9  | 26 | 8  | 15 | 12 | 26 | 11 | 11 | 19 | 29 | 24 | 6  | 15 | 17 | 16 | 16 |
| 73 | A138 | Sokitsu                 | 0 | 6  | 57 | 18 | 74 | 5  | 40 | 14 | 10 | 10 | 12 | 35 | 11 | 80 | 3  | 18 | 10 | 12 | 28 | 35 | 23 | 6  | 14 | 73 | 33 | 18 | 29 | 45 | 47 | 16 | 30 | 25 | 17 | 25 |
| 74 | A141 | Sour orange             | 0 | 10 | 15 | 10 | 24 | 9  | 0  | 16 | 18 | 18 | 17 | 14 | 21 | 29 | 15 | 12 | 19 | 15 | 9  | 32 | 20 | 20 | 21 | 25 | 0  | 12 | 14 | 16 | 12 | 13 | 20 | 14 | 10 | 17 |
| 75 | A144 | Sudachi                 | 0 | 19 | 48 | 22 | 54 | 12 | 26 | 15 | 22 | 17 | 17 | 26 | 18 | 55 | 10 | 16 | 18 | 8  | 25 | 12 | 26 | 15 | 24 | 57 | 27 | 27 | 21 | 20 | 14 | 21 | 12 | 15 | 12 | 25 |
| 76 | A145 | Suisho buntan           | 0 | 18 | 9  | 14 | 9  | 61 | 34 | 39 | 60 | 69 | 49 | 20 | 64 | 14 | 50 | 29 | 63 | 51 | 11 | 64 | 9  | 48 | 62 | 1  | 14 | 16 | 20 | 46 | 25 | 28 | 42 | 25 | 43 | 35 |
| 77 | A146 | Sunki                   | 0 | 14 | 58 | 28 | 75 | 11 | 36 | 19 | 11 | 6  | 7  | 27 | 6  | 81 | 11 | 20 | 7  | 12 | 30 | 31 | 28 | 12 | 5  | 75 | 36 | 26 | 25 | 43 | 47 | 7  | 27 | 28 | 18 | 24 |

|     |      |                     |   |    |    |    |    |    |    |    |    |    |    |    |    |    |    |    |    |    |    |    |    |    |    |    |    |    |    |    |    |    |    |    |    |    |
|-----|------|---------------------|---|----|----|----|----|----|----|----|----|----|----|----|----|----|----|----|----|----|----|----|----|----|----|----|----|----|----|----|----|----|----|----|----|----|
| 78  | A147 | Suruga Yuko         | 0 | 12 | 52 | 29 | 67 | 14 | 38 | 17 | 11 | 15 | 17 | 25 | 21 | 71 | 3  | 26 | 20 | 11 | 32 | 22 | 30 | 16 | 13 | 67 | 31 | 27 | 23 | 41 | 39 | 20 | 26 | 23 | 25 | 17 |
| 79  | A162 | Sweet orange        | 0 | 6  | 19 | 10 | 31 | 7  | 23 | 9  | 0  | 13 | 0  | 12 | 6  | 35 | 14 | 5  | 10 | 13 | 0  | 34 | 9  | 13 | 6  | 27 | 11 | 6  | 15 | 34 | 24 | 5  | 11 | 17 | 7  | 14 |
| 80  | A172 | Tachibana-A         | 1 | 22 | 61 | 33 | 71 | 23 | 44 | 15 | 29 | 19 | 27 | 20 | 24 | 77 | 8  | 28 | 17 | 5  | 37 | 0  | 36 | 28 | 29 | 77 | 45 | 33 | 17 | 41 | 49 | 25 | 42 | 28 | 30 | 12 |
| 81  | A174 | Tachibana-C         | 0 | 20 | 57 | 30 | 77 | 12 | 36 | 10 | 28 | 17 | 23 | 13 | 18 | 79 | 4  | 24 | 22 | 8  | 39 | 14 | 32 | 24 | 25 | 79 | 37 | 30 | 12 | 39 | 47 | 22 | 35 | 24 | 21 | 6  |
| 82  | A175 | Tachibana-B         | 0 | 19 | 58 | 34 | 70 | 22 | 40 | 21 | 29 | 18 | 25 | 22 | 21 | 76 | 10 | 28 | 19 | 1  | 43 | 9  | 36 | 24 | 27 | 76 | 42 | 34 | 0  | 39 | 44 | 24 | 35 | 24 | 31 | 12 |
| 83  | A183 | Tankan              | 0 | 13 | 49 | 25 | 56 | 13 | 38 | 11 | 8  | 17 | 7  | 25 | 6  | 62 | 15 | 18 | 0  | 15 | 15 | 36 | 24 | 17 | 6  | 57 | 36 | 13 | 26 | 41 | 42 | 12 | 26 | 32 | 21 | 26 |
| 84  | A186 | Temple              | 0 | 11 | 35 | 21 | 47 | 5  | 27 | 17 | 1  | 14 | 3  | 22 | 9  | 49 | 13 | 11 | 10 | 15 | 5  | 32 | 19 | 11 | 5  | 43 | 19 | 13 | 25 | 35 | 35 | 8  | 17 | 24 | 18 | 28 |
| 85  | A187 | Tengu               | 0 | 10 | 21 | 9  | 29 | 13 | 31 | 8  | 11 | 25 | 13 | 16 | 15 | 33 | 20 | 6  | 20 | 17 | 9  | 41 | 6  | 11 | 9  | 22 | 11 | 3  | 7  | 40 | 26 | 13 | 24 | 15 | 17 | 15 |
| 86  | A188 | Tizon               | 0 | 9  | 36 | 19 | 52 | 8  | 26 | 21 | 8  | 0  | 6  | 20 | 10 | 57 | 11 | 11 | 8  | 15 | 1  | 29 | 15 | 16 | 9  | 53 | 28 | 13 | 25 | 34 | 38 | 6  | 16 | 24 | 14 | 22 |
| 87  | A191 | Tosa buntan         | 0 | 14 | 12 | 8  | 10 | 53 | 31 | 33 | 51 | 61 | 41 | 11 | 56 | 15 | 46 | 20 | 53 | 45 | 12 | 53 | 7  | 41 | 53 | 6  | 13 | 12 | 17 | 44 | 24 | 21 | 37 | 20 | 38 | 20 |
| 88  | A192 | Twukkuni            | 1 | 21 | 47 | 26 | 68 | 21 | 38 | 14 | 28 | 22 | 24 | 13 | 28 | 67 | 10 | 22 | 27 | 13 | 30 | 21 | 28 | 16 | 22 | 66 | 34 | 15 | 14 | 41 | 37 | 24 | 36 | 26 | 21 | 8  |
| 89  | A196 | Uchimurasaki        | 0 | 18 | 8  | 14 | 6  | 76 | 40 | 47 | 73 | 84 | 67 | 25 | 79 | 13 | 71 | 30 | 79 | 64 | 10 | 79 | 11 | 59 | 79 | 10 | 14 | 15 | 27 | 56 | 28 | 30 | 45 | 33 | 58 | 46 |
| 90  | A197 | Ujukitsu            | 0 | 7  | 13 | 7  | 26 | 8  | 23 | 11 | 14 | 17 | 7  | 15 | 18 | 34 | 5  | 12 | 11 | 8  | 5  | 32 | 7  | 6  | 13 | 28 | 12 | 3  | 15 | 29 | 18 | 7  | 11 | 7  | 8  | 8  |
| 91  | A198 | Unzoki              | 0 | 8  | 22 | 3  | 43 | 16 | 34 | 13 | 23 | 21 | 19 | 9  | 26 | 48 | 6  | 9  | 24 | 7  | 18 | 14 | 10 | 16 | 22 | 41 | 18 | 9  | 13 | 29 | 30 | 14 | 17 | 13 | 20 | 3  |
| 92  | A199 | USSR Tangelo        | 0 | 3  | 10 | 7  | 15 | 22 | 23 | 23 | 30 | 30 | 19 | 19 | 30 | 18 | 16 | 11 | 25 | 20 | 10 | 40 | 11 | 16 | 23 | 11 | 10 | 4  | 14 | 35 | 24 | 15 | 21 | 12 | 19 | 20 |
| 93  | A200 | Med mandarin        | 0 | 11 | 61 | 29 | 77 | 5  | 38 | 20 | 8  | 9  | 7  | 31 | 8  | 80 | 9  | 19 | 8  | 14 | 27 | 30 | 30 | 10 | 10 | 76 | 36 | 21 | 26 | 40 | 52 | 12 | 29 | 34 | 22 | 26 |
| 94  | A201 | Willowleaf mandarin | 0 | 8  | 57 | 24 | 70 | 6  | 33 | 20 | 0  | 8  | 0  | 27 | 8  | 74 | 6  | 16 | 3  | 13 | 26 | 30 | 26 | 7  | 5  | 69 | 33 | 17 | 28 | 38 | 47 | 11 | 27 | 31 | 20 | 27 |
| 95  | A202 | Yamabuki            | 0 | 1  | 10 | 5  | 13 | 15 | 16 | 11 | 21 | 16 | 16 | 12 | 21 | 25 | 5  | 10 | 17 | 14 | 7  | 28 | 6  | 10 | 18 | 15 | 7  | 9  | 10 | 28 | 16 | 8  | 14 | 13 | 18 | 10 |
| 96  | A203 | Yamamikan           | 0 | 7  | 11 | 6  | 12 | 19 | 22 | 13 | 10 | 29 | 9  | 9  | 15 | 23 | 23 | 7  | 21 | 16 | 4  | 43 | 7  | 20 | 12 | 15 | 10 | 6  | 14 | 31 | 21 | 10 | 19 | 11 | 18 | 15 |
| 97  | A204 | Yatsushiro          | 0 | 8  | 33 | 7  | 55 | 9  | 41 | 12 | 21 | 21 | 16 | 23 | 13 | 59 | 5  | 14 | 18 | 23 | 25 | 34 | 4  | 14 | 11 | 52 | 19 | 19 | 18 | 43 | 38 | 4  | 24 | 21 | 18 | 9  |
| 98  | A205 | Yuge hyoukan        | 0 | 9  | 12 | 4  | 8  | 18 | 19 | 14 | 27 | 24 | 20 | 16 | 25 | 15 | 14 | 19 | 24 | 18 | 8  | 34 | 7  | 12 | 27 | 10 | 9  | 5  | 15 | 30 | 17 | 8  | 19 | 9  | 20 | 18 |
| 99  | A206 | Youpi ju            | 0 | 13 | 63 | 30 | 77 | 9  | 37 | 24 | 15 | 8  | 14 | 34 | 9  | 80 | 10 | 25 | 13 | 17 | 34 | 34 | 35 | 17 | 14 | 78 | 40 | 29 | 29 | 43 | 57 | 12 | 36 | 38 | 27 | 29 |
| 100 | A207 | Yuukunibu           | 0 | 0  | 16 | 7  | 19 | 15 | 20 | 16 | 23 | 22 | 15 | 16 | 16 | 31 | 13 | 10 | 21 | 14 | 11 | 36 | 11 | 13 | 19 | 20 | 12 | 9  | 18 | 35 | 21 | 5  | 22 | 16 | 16 | 21 |
| 101 | A208 | Yuzu                | 0 | 22 | 50 | 36 | 60 | 24 | 31 | 21 | 35 | 32 | 30 | 24 | 32 | 59 | 22 | 26 | 30 | 17 | 34 | 2  | 37 | 2  | 33 | 58 | 34 | 31 | 19 | 21 | 1  | 26 | 3  | 0  | 1  | 24 |

ND: no data

Mismatch <5  
Mismatch <10

|    | 5         | 1        | 2              | 2      | 0          | 1             | 1       | 12             | 1    | 1            | 2    | 0                | 0       | 16        | 1         | 1     | 0        | 0       | 0           | 0            | 1           | 1       | 2       | 0      | 2           | 1              | 1        | 1        | 2     | 1      | 0        | 1                  | 2              | 3        | 0                | 0              | 0           | 1                       | 2         | 6       | 0           | 1       |               |
|----|-----------|----------|----------------|--------|------------|---------------|---------|----------------|------|--------------|------|------------------|---------|-----------|-----------|-------|----------|---------|-------------|--------------|-------------|---------|---------|--------|-------------|----------------|----------|----------|-------|--------|----------|--------------------|----------------|----------|------------------|----------------|-------------|-------------------------|-----------|---------|-------------|---------|---------------|
|    | 9         | 4        | 3              | 3      | 1          | 1             | 2       | 18             | 2    | 3            | 4    | 1                | 2       | 30        | 3         | 3     | 1        | 1       | 0           | 0            | 2           | 3       | 2       | 8      | 8           | 4              | 1        | 5        | 4     | 11     | 1        | 0                  | 2              | 9        | 4                | 0              | 3           | 5                       | 4         | 5       | 6           | 1       | 2             |
|    | Kaikoukan | Kawabata | Kawachi bankan | Keraji | Kikudaidai | King mandarin | Kinkoji | Kishu mandarin | Kizu | Kobeni mikan | Koji | Kourai Tachibana | Kotokan | Kunenbo-A | Kunenbo-B | Lemon | Lemonade | Limonia | Mato buntan | Mexican lime | Meyer lemon | Mochiyu | Murcott | Naruto | Natsudaidai | Nidonari mikan | Oogonkan | Ootoukan | Oukan | Ponkan | Ponkitsu | Pummelo white type | Rokugatsumikan | Sanbokan | Satsuma mandarin | Satsuma Kikoku | Shiikuwasha | Shiikuwasha_Ogimikugata | Shunkokan | Sokitsu | Sour orange | Sudachi | Suisho buntan |
|    | A049      | A050     | A051           | A052   | A053       | A054          | A055    | A059           | A073 | A075         | A076 | A079             | A080    | A081      | A082      | A085  | A086     | A087    | A088        | A089         | A090        | A091    | A092    | A095   | A098        | A100           | A101     | A103     | A104  | A107   | A109     | A110               | A111           | A112     | A125             | A134           | A135        | A136                    | A137      | A138    | A141        | A144    | A145          |
| 0  | 0         | 0        | 0              | 0      | 0          | 0             | 0       | 0              | 0    | 0            | 1    | 0                | 0       | 0         | 0         | 0     | 0        | 0       | 0           | 1            | 0           | 0       | 0       | 0      | 0           | 0              | 0        | 0        | 0     | 0      | 1        | 0                  | 0              | 0        | 0                | 0              | 0           | 0                       | 0         | 0       | 0           | 0       | 0             |
| 0  | 13        | 8        | 13             | 9      | 11         | 10            | 0       | 15             | 14   | 16           | 25   | 5                | 8       | 11        | 22        | 15    | 24       | 18      | 43          | 17           | 11          | 10      | 5       | 6      | 7           | 7              | 11       | 8        | 13    | 16     | 17       | 13                 | 1              | 2        | 7                | 13             | 13          | 8                       | 6         | 10      | 19          | 18      |               |
| 10 | 26        | 8        | 37             | 20     | 41         | 16            | 52      | 37             | 57   | 42           | 60   | 19               | 13      | 40        | 34        | 29    | 52       | 10      | 56          | 40           | 39          | 42      | 8       | 11     | 38          | 26             | 25       | 24       | 49    | 55     | 13       | 36                 | 13             | 27       | 17               | 51             | 53          | 11                      | 57        | 15      | 48          | 9       |               |
| 4  | 9         | 12       | 9              | 16     | 11         | 11            | 14      | 15             | 26   | 22           | 37   | 8                | 0       | 20        | 28        | 22    | 37       | 13      | 47          | 25           | 11          | 22      | 5       | 9      | 15          | 16             | 10       | 5        | 17    | 32     | 19       | 18                 | 6              | 10       | 13               | 26             | 24          | 11                      | 18        | 10      | 22          | 14      |               |
| 7  | 40        | 13       | 52             | 25     | 51         | 21            | 70      | 54             | 75   | 54           | 63   | 20               | 36      | 57        | 46        | 62    | 10       | 61      | 51          | 49           | 61          | 9       | 17      | 56     | 37          | 21             | 26       | 67       | 68    | 10     | 48       | 18                 | 46             | 18       | 69               | 67             | 26          | 74                      | 24        | 54      | 9           |         |               |
| 30 | 12        | 30       | 17             | 31     | 13         | 26            | 6       | 13             | 3    | 10           | 25   | 9                | 4       | 14        | 29        | 26    | 21       | 67      | 54          | 21           | 11          | 10      | 10      | 7      | 12          | 13             | 0        | 10       | 3     | 15     | 72       | 19                 | 9              | 9        | 17               | 12             | 13          | 14                      | 5         | 9       | 12          | 61      |               |
| 27 | 31        | 23       | 41             | 27     | 34         | 27            | 34      | 35             | 36   | 29           | 33   | 15               | 26      | 16        | 4         | 19    | 19       | 32      | 32          | 25           | 29          | 34      | 20      | 18     | 20          | 20             | 23       | 24       | 37    | 44     | 36       | 12                 | 20             | 30       | 17               | 30             | 33          | 25                      | 40        | 0       | 26          | 34      |               |
| 27 | 9         | 23       | 10             | 26     | 10         | 13            | 14      | 10             | 16   | 8            | 23   | 11               | 7       | 12        | 29        | 26    | 24       | 42      | 44          | 24           | 16          | 12      | 14      | 9      | 22          | 13             | 13       | 16       | 12    | 21     | 45       | 14                 | 12             | 13       | 12               | 16             | 13          | 14                      | 14        | 16      | 15          | 39      |               |
| 39 | 28        | 35       | 22             | 38     | 19         | 32            | 7       | 22             | 16   | 14           | 29   | 17               | 8       | 23        | 34        | 30    | 25       | 69      | 58          | 24           | 19          | 13      | 18      | 15     | 13          | 24             | 15       | 17       | 4     | 14     | 72       | 25                 | 18             | 13       | 26               | 15             | 21          | 20                      | 10        | 18      | 22          | 60      |               |
| 42 | 22        | 38       | 26             | 34     | 18         | 33            | 10      | 23             | 12   | 14           | 24   | 14               | 10      | 16        | 32        | 25    | 14       | 79      | 57          | 27           | 24          | 12      | 20      | 12     | 15          | 19             | 25       | 14       | 10    | 16     | 78       | 22                 | 19             | 13       | 18               | 9              | 10          | 21                      | 10        | 18      | 17          | 69      |               |
| 31 | 23        | 29       | 20             | 36     | 15         | 29            | 9       | 22             | 14   | 13           | 29   | 16               | 7       | 21        | 35        | 18    | 27       | 61      | 60          | 27           | 12          | 10      | 13      | 10     | 12          | 18             | 16       | 15       | 3     | 14     | 64       | 21                 | 18             | 8        | 22               | 14             | 18          | 14                      | 12        | 17      | 17          | 49      |               |
| 11 | 16        | 18       | 15             | 14     | 21         | 12            | 26      | 24             | 32   | 12           | 25   | 11               | 14      | 8         | 24        | 19    | 27       | 16      | 49          | 28           | 20          | 28      | 10      | 15     | 25          | 17             | 18       | 17       | 27    | 27     | 27       | 8                  | 16             | 18       | 17               | 7              | 9           | 14                      | 35        | 14      | 26          | 20      |               |
| 41 | 19        | 39       | 18             | 33     | 18         | 31            | 7       | 18             | 9    | 14           | 28   | 9                | 9       | 22        | 40        | 26    | 23       | 74      | 60          | 24           | 20          | 3       | 16      | 7      | 12          | 20             | 18       | 12       | 0     | 11     | 76       | 30                 | 21             | 15       | 23               | 14             | 16          | 15                      | 11        | 21      | 18          | 64      |               |
| 17 | 41        | 17       | 58             | 30     | 57         | 21            | 76      | 51             | 80   | 63           | 63   | 30               | 9       | 3         | 60        | 50    | 48       | 67      | 13          | 65           | 60          | 51      | 68      | 17     | 25          | 59             | 37       | 33       | 39    | 72     | 72       | 20                 | 54             | 31       | 48               | 24             | 75          | 76                      | 31        | 80      | 29          | 55      | 14            |
| 29 | 8         | 26       | 7              | 20     | 15         | 21            | 0       | 17             | 10   | 0            | 17   | 10               | 3       | 7         | 29        | 20    | 19       | 62      | 49          | 20           | 17          | 12      | 8       | 5      | 10          | 10             | 15       | 8        | 11    | 15     | 66       | 7                  | 8              | 6        | 17               | 6              | 5           | 7                       | 3         | 15      | 10          | 50      |               |
| 7  | 10        | 18       | 15             | 17     | 14         | 12            | 17      | 10             | 20   | 19           | 30   | 13               | 3       | 13        | 29        | 23    | 30       | 27      | 48          | 19           | 14          | 13      | 9       | 9      | 18          | 13             | 2        | 8        | 11    | 23     | 31       | 18                 | 6              | 13       | 18               | 18             | 20          | 9                       | 18        | 12      | 16          | 29      |               |
| 39 | 19        | 37       | 20             | 33     | 11         | 29            | 8       | 21             | 13   | 20           | 21   | 7                | 7       | 16        | 38        | 24    | 26       | 75      | 60          | 25           | 23          | 10      | 15      | 10     | 14          | 20             | 18       | 14       | 4     | 5      | 74       | 26                 | 16             | 12       | 15               | 13             | 15          | 18                      | 10        | 19      | 18          | 63      |               |
| 35 | 10        | 25       | 10             | 18     | 10         | 33            | 10      | 19             | 12   | 3            | 13   | 13               | 8       | 5         | 21        | 22    | 19       | 56      | 43          | 26           | 16          | 10      | 9       | 8      | 19          | 10             | 21       | 13       | 11    | 20     | 62       | 7                  | 17             | 16       | 15               | 7              | 4           | 19                      | 12        | 15      | 8           | 51      |               |
| 6  | 17        | 8        | 23             | 18     | 17         | 13            | 28      | 23             | 30   | 28           | 33   | 9                | 5       | 22        | 23        | 22    | 35       | 16      | 49          | 26           | 20          | 18      | 4       | 7      | 19          | 12             | 11       | 14       | 18    | 21     | 16       | 17                 | 5              | 15       | 8                | 30             | 31          | 9                       | 28        | 9       | 25          | 11      |               |
| 53 | 29        | 42       | 24             | 1      | 28         | 46            | 28      | 16             | 38   | 14           | 5    | 27               | 33      | 10        | 37        | 37    | 31       | 72      | 38          | 33           | 18          | 34      | 30      | 27     | 36          | 26             | 40       | 33       | 31    | 35     | 74       | 14                 | 30             | 34       | 30               | 16             | 12          | 26                      | 35        | 32      | 12          | 64      |               |
| 4  | 4         | 11       | 10             | 13     | 15         | 6             | 23      | 16             | 29   | 23           | 36   | 9                | 0       | 26        | 30        | 28    | 37       | 12      | 52          | 28           | 11          | 16      | 5       | 9      | 22          | 13             | 12       | 14       | 18    | 31     | 13       | 22                 | 11             | 10       | 12               | 31             | 30          | 8                       | 23        | 20      | 26          | 9       |               |
| 29 | 13        | 21       | 10             | 27     | 12         | 18            | 3       | 12             | 15   | 19           | 19   | 11               | 0       | 15        | 31        | 22    | 24       | 54      | 40          | 24           | 13          | 18      | 13      | 7      | 13          | 21             | 15       | 10       | 11    | 16     | 58       | 19                 | 9              | 9        | 22               | 15             | 14          | 15                      | 6         | 20      | 15          | 48      |               |
| 40 | 23        | 36       | 20             | 38     | 16         | 34            | 6       | 19             | 14   | 16           | 33   | 7                | 8       | 21        | 38        | 21    | 24       | 71      | 61          | 22           | 21          | 7       | 18      | 10     | 11          | 23             | 23       | 15       | 0     | 13     | 72       | 28                 | 16             | 14       | 24               | 16             | 14          | 12                      | 14        | 21      | 24          | 62      |               |
| 10 | 38        | 10       | 53             | 24     | 51         | 20            | 69      | 49             | 75   | 56           | 67   | 19               | 33      | 60        | 48        | 39    | 63       | 7       | 62          | 51           | 50          | 58      | 12      | 12     | 57          | 34             | 23       | 28       | 66    | 70     | 7        | 51                 | 16             | 42       | 27               | 72             | 72          | 26                      | 73        | 25      | 57          | 1       |               |
| 9  | 21        | 8        | 27             | 13     | 25         | 16            | 32      | 31             | 33   | 30           | 39   | 15               | 13      | 21        | 18        | 16    | 36       | 15      | 50          | 31           | 19          | 29      | 6       | 6      | 18          | 16             | 13       | 14       | 33    | 44     | 15       | 21                 | 8              | 19       | 15               | 34             | 35          | 11                      | 33        | 0       | 27          | 14      |               |
| 10 | 12        | 8        | 9              | 17     | 11         | 7             | 13      | 10             | 21   | 27           | 37   | 7                | 0       | 15        | 25        | 24    | 30       | 19      | 43          | 19           | 14          | 14      | 5       | 3      | 17          | 12             | 10       | 9        | 14    | 20     | 20       | 14                 | 6              | 8        | 11               | 24             | 23          | 11                      | 18        | 12      | 27          | 16      |               |
| 9  | 8         | 14       | 10             | 14     | 19         | 8             | 25      | 15             | 26   | 14           | 16   | 14               | 10      | 10        | 22        | 20    | 25       | 28      | 44          | 21           | 14          | 26      | 19      | 15     | 21          | 15             | 16       | 19       | 27    | 25     | 29       | 11                 | 12             | 14       | 15               | 13             | 10          | 19                      | 29        | 14      | 21          | 20      |               |
| 38 | 36        | 36       | 41             | 33     | 35         | 44            | 39      | 19             | 43   | 34           | 29   | 25               | 34      | 30        | 1         | 19    | 21       | 54      | 25          | 22           | 25          | 39      | 27      | 27     | 38          | 28             | 31       | 31       | 39    | 43     | 55       | 27                 | 24             | 39       | 26               | 32             | 33          | 29                      | 45        | 16      | 20          | 46      |               |
| 19 | 29        | 21       | 33             | 21     | 32         | 23            | 44      | 8              | 45   | 35           | 25   | 19               | 23      | 29        | 23        | 28    | 38       | 19      | 35          | 30           | 13          | 37      | 17      | 14     | 36          | 30             | 19       | 29       | 44    | 51     | 32       | 24                 | 19             | 34       | 18               | 39             | 39          | 24                      | 47        | 12      | 14          | 25      |               |
| 0  | 7         | 18       | 14             | 10     | 10         | 7             | 8       | 9              | 18   | 16           | 29   | 6                | 3       | 19        | 28        | 16    | 23       | 29      | 49          | 15           | 8           | 9       | 9       | 4      | 9           | 11             | 8        | 7        | 1     | 13     | 27       | 21                 | 5              | 11       | 11               | 14             | 15          | 6                       | 16        | 13      | 21          | 28      |               |
| 21 | 20        | 23       | 24             | 21     | 31         | 20            | 27      | 8              | 29   | 19           | 18   | 12               | 2       | 27        | 27        | 25    | 33       | 42      | 42          | 30           | 16          | 29      | 18      | 11     | 17          | 26             | 20       | 19       | 24    | 28     | 48       | 24                 | 17             | 17       | 21               | 29             | 32          | 15                      | 30        | 20      | 12          | 42      |               |
| 16 | 15        | 14       | 18             | 15     | 22         | 18            | 21      | 16             | 33   | 22           | 18   | 12               | 12      | 15        | 29        | 25    | 31       | 29      | 40          | 26           | 9           | 32      | 9       | 10     | 26          | 19             | 13       | 12       | 27    | 34     | 29       | 14                 | 21             | 10       | 20               | 19             | 17          | 25                      | 14        | 15      | 25          |         |               |

|    |    |    |    |    |    |    |    |    |    |    |    |    |    |    |    |    |    |    |    |    |    |    |    |    |    |    |    |    |    |    |    |    |    |    |    |    |    |    |    |    |    |    |
|----|----|----|----|----|----|----|----|----|----|----|----|----|----|----|----|----|----|----|----|----|----|----|----|----|----|----|----|----|----|----|----|----|----|----|----|----|----|----|----|----|----|----|
| 25 | 16 | 29 | 19 | 20 | 19 | 23 | 13 | 5  | 16 | 17 | 24 | 11 | 0  | 16 | 30 | 22 | 25 | 49 | 41 | 21 | 4  | 17 | 12 | 8  | 20 | 15 | 9  | 11 | 11 | 27 | 58 | 16 | 12 | 14 | 21 | 19 | 16 | 16 | 17 | 10 | 12 | 43 |
| 4  | 6  | 20 | 0  | 19 | 15 | 8  | 21 | 10 | 25 | 13 | 28 | 13 | 0  | 7  | 34 | 21 | 29 | 45 | 50 | 22 | 17 | 21 | 17 | 11 | 20 | 18 | 16 | 17 | 19 | 28 | 46 | 9  | 10 | 16 | 18 | 6  | 5  | 16 | 25 | 17 | 25 | 35 |
| 0  | 8  | 14 | 23 | 13 | 26 | 7  | 35 | 18 | 43 | 30 | 49 | 12 | 0  | 34 | 37 | 22 | 48 | 11 | 57 | 27 | 21 | 33 | 8  | 8  | 26 | 20 | 10 | 19 | 30 | 45 | 13 | 36 | 0  | 15 | 14 | 38 | 39 | 13 | 39 | 17 | 36 | 13 |
| 8  | 0  | 24 | 5  | 18 | 15 | 2  | 16 | 7  | 25 | 13 | 26 | 15 | 0  | 19 | 37 | 21 | 32 | 39 | 54 | 22 | 13 | 17 | 16 | 12 | 21 | 9  | 10 | 17 | 15 | 21 | 38 | 22 | 13 | 11 | 13 | 22 | 17 | 16 | 21 | 19 | 18 | 31 |
| 14 | 24 | 0  | 24 | 19 | 25 | 15 | 24 | 28 | 33 | 29 | 36 | 10 | 12 | 24 | 32 | 23 | 38 | 11 | 48 | 28 | 24 | 30 | 3  | 7  | 29 | 18 | 14 | 17 | 34 | 36 | 16 | 19 | 7  | 23 | 12 | 31 | 30 | 7  | 30 | 12 | 35 | 14 |
| 23 | 5  | 24 | 0  | 22 | 11 | 23 | 16 | 19 | 22 | 14 | 31 | 18 | 0  | 13 | 39 | 31 | 34 | 56 | 58 | 23 | 5  | 14 | 15 | 12 | 24 | 12 | 15 | 21 | 17 | 24 | 53 | 9  | 17 | 8  | 22 | 13 | 11 | 16 | 19 | 25 | 23 | 43 |
| 13 | 18 | 19 | 22 | 0  | 30 | 18 | 32 | 16 | 41 | 20 | 21 | 12 | 17 | 15 | 35 | 25 | 34 | 27 | 46 | 28 | 19 | 31 | 12 | 8  | 26 | 26 | 19 | 18 | 31 | 37 | 31 | 15 | 17 | 24 | 16 | 19 | 17 | 12 | 39 | 17 | 22 | 27 |
| 26 | 15 | 25 | 11 | 30 | 0  | 20 | 12 | 21 | 14 | 13 | 23 | 12 | 6  | 14 | 30 | 22 | 22 | 57 | 52 | 17 | 11 | 0  | 13 | 9  | 14 | 12 | 17 | 17 | 13 | 19 | 52 | 19 | 15 | 12 | 13 | 16 | 18 | 16 | 14 | 15 | 14 | 44 |
| 7  | 2  | 15 | 23 | 18 | 20 | 0  | 26 | 9  | 34 | 28 | 43 | 13 | 0  | 33 | 37 | 25 | 43 | 19 | 58 | 30 | 23 | 22 | 9  | 10 | 19 | 16 | 11 | 17 | 26 | 26 | 21 | 31 | 13 | 6  | 16 | 31 | 32 | 13 | 33 | 16 | 34 | 10 |
| 35 | 16 | 24 | 16 | 32 | 12 | 26 | 0  | 16 | 3  | 13 | 25 | 5  | 0  | 12 | 32 | 23 | 19 | 71 | 56 | 23 | 17 | 8  | 0  | 1  | 0  | 17 | 17 | 0  | 7  | 14 | 75 | 20 | 0  | 0  | 17 | 6  | 9  | 3  | 0  | 15 | 16 | 61 |
| 18 | 7  | 28 | 19 | 36 | 21 | 9  | 16 | 0  | 22 | 16 | 22 | 14 | 0  | 24 | 31 | 22 | 28 | 48 | 36 | 24 | 16 | 16 | 9  | 14 | 18 | 10 | 14 | 11 | 24 | 55 | 27 | 13 | 12 | 21 | 23 | 21 | 14 | 23 | 19 | 10 | 44 |    |
| 43 | 25 | 33 | 22 | 41 | 14 | 34 | 3  | 22 | 0  | 14 | 26 | 12 | 12 | 15 | 34 | 29 | 24 | 78 | 60 | 24 | 20 | 11 | 16 | 12 | 13 | 15 | 18 | 15 | 10 | 16 | 80 | 23 | 21 | 13 | 20 | 11 | 16 | 21 | 0  | 16 | 12 | 69 |
| 30 | 13 | 29 | 14 | 20 | 13 | 28 | 13 | 16 | 14 | 0  | 12 | 10 | 13 | 6  | 25 | 22 | 21 | 53 | 45 | 29 | 21 | 11 | 18 | 14 | 18 | 10 | 21 | 11 | 8  | 24 | 61 | 8  | 16 | 21 | 19 | 10 | 8  | 17 | 13 | 17 | 7  | 53 |
| 49 | 26 | 36 | 31 | 21 | 23 | 43 | 25 | 22 | 26 | 12 | 1  | 24 | 28 | 16 | 36 | 34 | 29 | 68 | 39 | 38 | 20 | 31 | 27 | 28 | 34 | 22 | 28 | 32 | 25 | 26 | 68 | 18 | 24 | 31 | 22 | 20 | 19 | 32 | 28 | 23 | 14 | 61 |
| 12 | 15 | 10 | 18 | 12 | 12 | 13 | 5  | 14 | 12 | 10 | 24 | 0  | 8  | 10 | 19 | 13 | 22 | 18 | 41 | 11 | 14 | 15 | 6  | 4  | 5  | 10 | 7  | 3  | 9  | 13 | 27 | 11 | 9  | 11 | 11 | 12 | 13 | 10 | 10 | 9  | 17 | 21 |
| 0  | 0  | 12 | 0  | 17 | 6  | 0  | 0  | 0  | 12 | 13 | 28 | 8  | 0  | 14 | 26 | 15 | 25 | 33 | 50 | 11 | 0  | 12 | 12 | 4  | 3  | 10 | 3  | 4  | 3  | 14 | 37 | 13 | 6  | 0  | 10 | 12 | 12 | 8  | 6  | 13 | 16 | 27 |
| 34 | 19 | 24 | 13 | 15 | 14 | 33 | 12 | 24 | 15 | 6  | 16 | 10 | 14 | 0  | 20 | 21 | 19 | 58 | 42 | 25 | 21 | 19 | 15 | 11 | 13 | 11 | 16 | 17 | 19 | 24 | 60 | 2  | 12 | 16 | 17 | 6  | 4  | 18 | 16 | 0  | 15 | 49 |
| 37 | 37 | 32 | 39 | 35 | 30 | 37 | 32 | 31 | 34 | 25 | 36 | 19 | 26 | 20 | 0  | 16 | 8  | 46 | 11 | 9  | 30 | 32 | 24 | 21 | 25 | 17 | 29 | 27 | 35 | 40 | 48 | 15 | 22 | 30 | 22 | 30 | 33 | 22 | 35 | 0  | 24 | 44 |
| 22 | 21 | 23 | 31 | 25 | 22 | 25 | 23 | 22 | 29 | 22 | 34 | 13 | 15 | 21 | 16 | 0  | 10 | 43 | 18 | 4  | 22 | 25 | 22 | 16 | 22 | 15 | 22 | 25 | 23 | 34 | 45 | 27 | 17 | 23 | 18 | 22 | 22 | 19 | 29 | 15 | 24 | 41 |
| 48 | 32 | 38 | 34 | 34 | 22 | 43 | 19 | 28 | 24 | 21 | 29 | 22 | 25 | 19 | 8  | 10 | 0  | 62 | 7  | 1  | 30 | 19 | 24 | 23 | 23 | 22 | 27 | 21 | 19 | 33 | 66 | 19 | 24 | 26 | 27 | 28 | 10 | 26 | 25 | 18 | 26 | 60 |
| 11 | 39 | 11 | 56 | 27 | 57 | 19 | 71 | 48 | 78 | 53 | 68 | 18 | 33 | 58 | 46 | 43 | 62 | 0  | 63 | 57 | 50 | 63 | 10 | 13 | 57 | 36 | 21 | 32 | 67 | 73 | 11 | 50 | 18 | 44 | 23 | 75 | 71 | 24 | 73 | 21 | 56 | 15 |
| 57 | 54 | 48 | 58 | 46 | 52 | 58 | 56 | 36 | 60 | 45 | 39 | 41 | 50 | 42 | 11 | 18 | 7  | 63 | 1  | 6  | 43 | 54 | 44 | 42 | 56 | 49 | 44 | 45 | 54 | 59 | 66 | 43 | 40 | 60 | 42 | 53 | 51 | 49 | 61 | 38 | 36 | 62 |
| 27 | 22 | 28 | 23 | 28 | 17 | 30 | 23 | 24 | 24 | 29 | 38 | 11 | 11 | 25 | 9  | 4  | 1  | 57 | 6  | 0  | 18 | 22 | 20 | 14 | 25 | 22 | 16 | 23 | 19 | 28 | 54 | 29 | 18 | 20 | 28 | 23 | 24 | 22 | 24 | 22 | 27 | 48 |
| 21 | 13 | 24 | 5  | 19 | 11 | 23 | 17 | 16 | 20 | 21 | 20 | 14 | 0  | 21 | 30 | 22 | 30 | 50 | 43 | 18 | 0  | 19 | 13 | 10 | 19 | 17 | 8  | 16 | 15 | 28 | 54 | 19 | 15 | 14 | 21 | 20 | 20 | 12 | 17 | 16 | 7  | 44 |
| 33 | 17 | 30 | 14 | 31 | 0  | 22 | 8  | 16 | 11 | 11 | 31 | 15 | 12 | 19 | 32 | 25 | 19 | 63 | 54 | 22 | 19 | 0  | 12 | 7  | 14 | 12 | 16 | 14 | 5  | 19 | 65 | 22 | 21 | 15 | 20 | 14 | 15 | 12 | 11 | 16 | 18 | 57 |
| 8  | 16 | 3  | 15 | 12 | 13 | 9  | 0  | 16 | 16 | 18 | 27 | 6  | 12 | 15 | 24 | 22 | 24 | 10 | 44 | 20 | 13 | 12 | 0  | 1  | 11 | 9  | 7  | 7  | 17 | 25 | 16 | 13 | 4  | 8  | 12 | 18 | 16 | 4  | 8  | 11 | 19 | 13 |
| 8  | 12 | 7  | 12 | 8  | 9  | 10 | 1  | 9  | 12 | 14 | 28 | 4  | 4  | 11 | 21 | 16 | 23 | 13 | 42 | 14 | 10 | 7  | 1  | 0  | 7  | 11 | 5  | 4  | 8  | 19 | 19 | 11 | 7  | 9  | 13 | 12 | 14 | 5  | 4  | 10 | 17 | 16 |
| 26 | 21 | 29 | 24 | 26 | 14 | 19 | 0  | 14 | 13 | 18 | 34 | 5  | 3  | 13 | 25 | 22 | 23 | 57 | 56 | 25 | 19 | 14 | 11 | 7  | 0  | 17 | 15 | 9  | 10 | 13 | 63 | 15 | 15 | 8  | 16 | 14 | 19 | 4  | 10 | 0  | 22 | 50 |
| 20 | 9  | 18 | 12 | 26 | 12 | 16 | 17 | 18 | 15 | 10 | 22 | 10 | 10 | 11 | 17 | 15 | 22 | 36 | 49 | 22 | 17 | 12 | 9  | 11 | 17 | 0  | 11 | 14 | 17 | 24 | 40 | 12 | 15 | 15 | 11 | 16 | 15 | 14 | 18 | 11 | 10 | 22 |
| 10 | 10 | 14 | 15 | 19 | 17 | 11 | 17 | 10 | 18 | 21 | 28 | 7  | 3  | 16 | 29 | 22 | 27 | 21 | 44 | 16 | 8  | 16 | 7  | 5  | 15 | 11 | 0  | 10 | 13 | 27 | 26 | 21 | 4  | 17 | 14 | 25 | 24 | 13 | 16 | 12 | 18 | 25 |
| 19 | 17 | 17 | 21 | 18 | 17 | 17 | 0  | 14 | 15 | 11 | 32 | 3  | 4  | 17 | 27 | 25 | 21 | 32 | 45 | 23 | 16 | 14 | 7  | 4  | 9  | 14 | 10 | 0  | 12 | 18 | 34 | 16 | 7  | 6  | 15 | 12 | 13 | 11 | 12 | 11 | 17 | 28 |
| 30 | 15 | 34 | 17 | 31 | 13 | 26 | 7  | 11 | 10 | 8  | 25 | 9  | 3  | 19 | 35 | 23 | 19 | 67 | 54 | 19 | 15 | 5  | 17 | 8  | 10 | 17 | 13 | 12 | 0  | 10 | 69 | 26 | 15 | 14 | 19 | 12 | 15 | 11 | 8  | 21 | 15 | 59 |
| 45 | 21 | 36 | 24 | 37 | 19 | 26 | 14 | 24 | 16 | 24 | 26 | 13 | 14 | 24 | 40 | 34 | 33 | 73 | 59 | 28 | 28 | 19 | 25 | 19 | 13 | 24 | 27 | 18 | 10 | 0  | 72 | 30 | 26 | 13 | 19 | 14 | 20 | 16 | 17 | 30 | 25 | 56 |
| 13 | 38 | 16 | 53 | 31 | 52 | 21 | 75 | 55 | 80 | 61 | 68 | 27 | 37 | 60 | 48 | 45 | 66 | 11 | 66 | 54 | 54 | 65 | 16 | 19 | 63 | 40 | 26 | 34 | 69 | 72 | 0  | 56 | 21 | 48 | 30 | 74 | 74 | 30 | 77 | 28 | 63 | 10 |
| 36 | 22 | 19 | 9  | 15 | 19 | 31 | 20 | 27 | 23 | 8  | 18 | 11 | 13 | 2  | 15 | 27 | 19 | 50 | 43 | 29 | 19 | 22 | 13 | 11 | 15 | 12 | 21 | 16 | 26 | 30 | 56 | 0  | 17 | 17 | 15 | 6  | 6  | 18 | 23 | 0  | 21 | 41 |
| 0  | 13 | 7  | 17 | 17 | 15 | 13 | 0  | 13 | 21 | 16 | 24 | 9  | 6  | 12 | 22 | 17 | 24 | 18 | 40 | 18 | 15 | 21 | 4  | 7  | 15 | 15 | 4  | 7  | 15 | 26 | 21 | 17 | 0  | 8  | 11 | 14 | 13 | 5  | 10 | 10 | 18 | 19 |
| 15 | 11 | 23 | 8  | 24 | 12 | 6  | 0  | 12 | 13 | 21 | 31 | 11 | 0  | 16 | 30 | 23 | 26 | 44 | 60 | 20 | 14 | 15 | 8  | 9  | 8  | 15 | 17 | 6  | 14 | 13 | 48 | 17 | 8  | 0  | 13 | 14 | 15 | 8  | 6  | 15 | 21 | 35 |
| 14 | 13 | 12 | 22 | 16 | 13 | 16 | 17 | 21 | 20 | 19 | 22 | 11 | 10 | 17 | 22 | 18 | 27 | 23 | 42 | 28 | 21 | 20 | 12 | 13 | 16 | 11 | 14 | 15 | 19 | 19 | 30 | 15 | 11 | 13 | 0  | 16 | 19 | 15 | 19 | 14 | 16 | 23 |
| 38 | 22 | 31 | 13 | 19 | 16 | 31 | 6  | 23 | 11 | 10 | 20 | 12 | 12 | 6  | 30 | 22 | 18 | 75 | 53 | 23 | 20 | 14 | 18 | 12 | 14 | 16 | 25 | 12 | 12 | 14 | 74 | 6  | 14 | 14 | 16 | 0  | 4  | 17 | 10 | 16 | 20 | 63 |
| 39 | 17 | 30 | 11 | 17 | 18 | 32 | 9  | 21 | 16 | 8  | 19 | 13 | 12 | 4  | 33 | 22 | 10 | 71 | 51 | 24 | 20 | 15 | 16 | 14 | 19 | 15 | 24 | 13 | 15 | 20 | 74 | 6  | 13 | 15 | 19 | 4  | 0  | 18 | 14 | 17 | 18 | 61 |
| 13 | 16 | 7  | 16 | 12 | 16 | 13 | 3  | 14 | 21 | 17 | 32 | 10 | 8  | 18 | 22 | 19 | 26 | 24 | 49 | 22 | 12 | 12 | 4  | 5  | 4  | 14 | 13 | 11 | 11 | 16 | 30 | 18 | 5  | 8  | 15 | 17 | 18 | 0  | 15 | 12 | 25 | 24 |
| 39 | 21 | 30 | 19 | 39 | 14 | 33 | 0  | 23 | 0  | 13 |    |    |    |    |    |    |    |    |    |    |    |    |    |    |    |    |    |    |    |    |    |    |    |    |    |    |    |    |    |    |    |    |

|    |    |    |    |    |    |    |    |    |    |    |    |    |    |    |    |    |    |    |    |    |    |    |    |    |    |    |    |    |    |    |    |    |    |    |    |    |    |    |    |    |    |    |
|----|----|----|----|----|----|----|----|----|----|----|----|----|----|----|----|----|----|----|----|----|----|----|----|----|----|----|----|----|----|----|----|----|----|----|----|----|----|----|----|----|----|----|
| 37 | 21 | 27 | 18 | 27 | 13 | 33 | 0  | 22 | 16 | 0  | 20 | 14 | 16 | 11 | 32 | 26 | 27 | 65 | 51 | 30 | 25 | 16 | 10 | 13 | 14 | 16 | 22 | 15 | 14 | 22 | 72 | 13 | 7  | 18 | 24 | 12 | 10 | 10 | 8  | 22 | 21 | 63 |
| 9  | 9  | 14 | 13 | 20 | 11 | 8  | 11 | 8  | 13 | 10 | 27 | 13 | 1  | 21 | 22 | 13 | 28 | 25 | 55 | 21 | 9  | 6  | 11 | 5  | 9  | 12 | 4  | 12 | 4  | 8  | 33 | 16 | 12 | 6  | 14 | 17 | 21 | 7  | 12 | 12 | 18 | 19 |
| 46 | 20 | 40 | 20 | 16 | 21 | 39 | 20 | 34 | 25 | 5  | 11 | 18 | 24 | 9  | 42 | 35 | 26 | 75 | 55 | 36 | 30 | 27 | 26 | 22 | 30 | 21 | 32 | 25 | 23 | 25 | 78 | 13 | 23 | 29 | 15 | 5  | 5  | 23 | 22 | 32 | 20 | 66 |
| 47 | 17 | 35 | 13 | 20 | 17 | 34 | 14 | 25 | 12 | 2  | 12 | 18 | 21 | 5  | 32 | 28 | 18 | 76 | 53 | 32 | 25 | 14 | 22 | 19 | 24 | 0  | 24 | 18 | 18 | 19 | 81 | 8  | 22 | 22 | 21 | 5  | 5  | 23 | 15 | 21 | 8  | 67 |
| 42 | 16 | 36 | 21 | 16 | 23 | 41 | 16 | 28 | 22 | 9  | 8  | 20 | 23 | 9  | 38 | 32 | 23 | 75 | 51 | 34 | 26 | 26 | 22 | 21 | 28 | 20 | 31 | 24 | 20 | 24 | 75 | 14 | 22 | 27 | 21 | 9  | 4  | 26 | 22 | 28 | 17 | 67 |
| 39 | 18 | 32 | 19 | 34 | 12 | 26 | 12 | 23 | 15 | 18 | 28 | 12 | 12 | 20 | 37 | 31 | 30 | 61 | 58 | 26 | 26 | 9  | 17 | 14 | 14 | 20 | 20 | 17 | 8  | 0  | 62 | 22 | 20 | 11 | 18 | 16 | 20 | 14 | 14 | 23 | 20 | 46 |
| 32 | 21 | 25 | 18 | 31 | 20 | 23 | 9  | 20 | 19 | 17 | 28 | 11 | 5  | 19 | 25 | 18 | 23 | 42 | 54 | 25 | 17 | 15 | 13 | 9  | 10 | 18 | 15 | 14 | 3  | 14 | 50 | 20 | 17 | 12 | 20 | 17 | 17 | 14 | 14 | 14 | 21 | 35 |
| 8  | 8  | 12 | 10 | 29 | 10 | 9  | 20 | 13 | 17 | 17 | 36 | 14 | 2  | 22 | 32 | 19 | 33 | 24 | 52 | 20 | 14 | 8  | 8  | 7  | 21 | 11 | 12 | 14 | 10 | 14 | 27 | 23 | 6  | 12 | 20 | 26 | 28 | 13 | 20 | 18 | 23 | 19 |
| 27 | 16 | 29 | 21 | 29 | 14 | 24 | 8  | 12 | 11 | 13 | 27 | 8  | 4  | 18 | 23 | 22 | 22 | 50 | 53 | 24 | 20 | 9  | 16 | 8  | 9  | 15 | 8  | 12 | 4  | 16 | 53 | 20 | 12 | 8  | 15 | 12 | 12 | 11 | 9  | 15 | 18 | 44 |
| 8  | 22 | 12 | 28 | 22 | 35 | 11 | 54 | 35 | 60 | 42 | 52 | 15 | 16 | 43 | 41 | 36 | 60 | 11 | 64 | 45 | 35 | 46 | 10 | 15 | 46 | 22 | 21 | 26 | 47 | 50 | 14 | 35 | 17 | 29 | 18 | 54 | 53 | 17 | 58 | 21 | 44 | 0  |
| 36 | 18 | 30 | 10 | 26 | 16 | 28 | 19 | 25 | 19 | 13 | 27 | 22 | 8  | 12 | 35 | 29 | 28 | 67 | 54 | 28 | 21 | 15 | 25 | 17 | 27 | 15 | 27 | 22 | 24 | 23 | 68 | 10 | 23 | 12 | 18 | 1  | 6  | 23 | 22 | 23 | 22 | 51 |
| 12 | 42 | 5  | 58 | 29 | 59 | 16 | 80 | 55 | 82 | 66 | 75 | 25 | 35 | 63 | 52 | 48 | 71 | 8  | 70 | 58 | 57 | 65 | 5  | 11 | 61 | 45 | 21 | 36 | 72 | 77 | 13 | 55 | 24 | 48 | 27 | 79 | 77 | 23 | 80 | 26 | 65 | 12 |
| 9  | 10 | 0  | 8  | 15 | 10 | 11 | 0  | 8  | 13 | 11 | 25 | 8  | 5  | 12 | 23 | 17 | 26 | 27 | 46 | 16 | 6  | 12 | 4  | 6  | 9  | 13 | 5  | 9  | 12 | 21 | 31 | 8  | 4  | 8  | 10 | 14 | 13 | 8  | 6  | 13 | 16 | 24 |
| 4  | 9  | 20 | 4  | 19 | 16 | 10 | 18 | 14 | 25 | 9  | 26 | 12 | 0  | 6  | 29 | 17 | 25 | 39 | 49 | 24 | 19 | 20 | 14 | 10 | 20 | 17 | 20 | 12 | 20 | 26 | 46 | 6  | 9  | 11 | 17 | 1  | 4  | 15 | 22 | 18 | 20 | 34 |
| 13 | 15 | 12 | 17 | 21 | 16 | 14 | 15 | 18 | 26 | 27 | 32 | 9  | 7  | 21 | 28 | 23 | 35 | 8  | 50 | 25 | 17 | 23 | 7  | 6  | 18 | 12 | 15 | 11 | 27 | 24 | 16 | 19 | 10 | 0  | 10 | 28 | 27 | 14 | 20 | 13 | 21 | 7  |
| 45 | 26 | 37 | 23 | 35 | 15 | 35 | 4  | 21 | 8  | 16 | 24 | 10 | 9  | 16 | 35 | 22 | 16 | 80 | 55 | 19 | 18 | 8  | 18 | 11 | 12 | 18 | 15 | 16 | 7  | 15 | 82 | 25 | 16 | 9  | 19 | 9  | 11 | 15 | 5  | 18 | 18 | 70 |
| 40 | 24 | 32 | 21 | 34 | 12 | 31 | 3  | 22 | 8  | 15 | 25 | 9  | 5  | 17 | 33 | 17 | 18 | 71 | 54 | 22 | 18 | 9  | 13 | 9  | 11 | 20 | 15 | 12 | 6  | 14 | 73 | 22 | 12 | 8  | 18 | 8  | 12 | 14 | 4  | 16 | 18 | 61 |
| 0  | 12 | 9  | 17 | 12 | 13 | 12 | 5  | 16 | 19 | 8  | 27 | 7  | 6  | 12 | 21 | 16 | 29 | 15 | 40 | 24 | 16 | 20 | 9  | 6  | 13 | 11 | 15 | 10 | 18 | 16 | 19 | 15 | 3  | 9  | 10 | 11 | 18 | 13 | 10 | 12 | 19 | 20 |
| 8  | 12 | 8  | 14 | 16 | 13 | 16 | 23 | 17 | 20 | 16 | 37 | 8  | 4  | 20 | 26 | 19 | 36 | 13 | 51 | 24 | 15 | 11 | 8  | 6  | 21 | 11 | 10 | 13 | 11 | 20 | 17 | 18 | 9  | 14 | 15 | 27 | 27 | 16 | 25 | 12 | 24 | 10 |
| 6  | 4  | 27 | 9  | 21 | 12 | 6  | 0  | 8  | 21 | 16 | 34 | 16 | 0  | 22 | 40 | 23 | 27 | 49 | 58 | 23 | 16 | 12 | 11 | 6  | 7  | 18 | 9  | 8  | 8  | 19 | 53 | 29 | 5  | 5  | 19 | 18 | 15 | 0  | 14 | 18 | 23 | 45 |
| 11 | 16 | 0  | 15 | 15 | 20 | 9  | 13 | 21 | 26 | 17 | 31 | 7  | 11 | 16 | 24 | 20 | 30 | 7  | 40 | 22 | 17 | 23 | 0  | 6  | 18 | 21 | 13 | 10 | 20 | 31 | 15 | 10 | 4  | 25 | 8  | 23 | 21 | 6  | 17 | 10 | 23 | 8  |
| 49 | 26 | 41 | 27 | 40 | 14 | 38 | 9  | 26 | 9  | 18 | 25 | 12 | 13 | 20 | 36 | 24 | 18 | 81 | 55 | 25 | 21 | 10 | 21 | 12 | 12 | 18 | 26 | 15 | 10 | 15 | 83 | 30 | 25 | 14 | 15 | 5  | 13 | 19 | 11 | 21 | 16 | 74 |
| 7  | 18 | 9  | 17 | 16 | 13 | 17 | 5  | 23 | 16 | 22 | 31 | 9  | 12 | 15 | 27 | 24 | 28 | 22 | 49 | 22 | 14 | 13 | 6  | 7  | 11 | 12 | 15 | 9  | 19 | 21 | 23 | 17 | 1  | 6  | 13 | 19 | 18 | 9  | 12 | 15 | 24 | 26 |
| 43 | 25 | 33 | 29 | 16 | 24 | 40 | 25 | 2  | 29 | 19 | 2  | 20 | 30 | 16 | 33 | 30 | 29 | 57 | 35 | 27 | 2  | 32 | 21 | 22 | 32 | 27 | 26 | 25 | 26 | 38 | 64 | 19 | 25 | 33 | 28 | 22 | 17 | 29 | 29 | 21 | 3  | 55 |

|   |   |    |   |   |   |   |   |   |   |   |   |   |   |   |   |   |   |   |   |   |   |   |   |    |
|---|---|----|---|---|---|---|---|---|---|---|---|---|---|---|---|---|---|---|---|---|---|---|---|----|
| 0 | 2 | 8  | 1 | 1 | 1 | 3 | 1 | 1 | 2 | 1 | 0 | 0 | 3 | 1 | 1 | 1 | 2 | 1 | 1 | 3 | 3 | 1 | 1 | 1  |
| 2 | 3 | 12 | 3 | 4 | 4 | 3 | 5 | 5 | 5 | 2 | 1 | 0 | 6 | 7 | 4 | 4 | 9 | 4 | 4 | 7 | 6 | 2 | 3 | 10 |

|       |             |              |             |             |             |        |        |       |       |             |          |              |          |        |              |              |                     |          |           |            |              |          |           |      |
|-------|-------------|--------------|-------------|-------------|-------------|--------|--------|-------|-------|-------------|----------|--------------|----------|--------|--------------|--------------|---------------------|----------|-----------|------------|--------------|----------|-----------|------|
| Sunki | Suruga Yuko | Sweet orange | Tachibana-A | Tachibana-C | Tachibana-B | Tankan | Temple | Tengu | Tizon | Tosa buntan | Twukkuni | Uchimurasaki | Ujukitsu | Unzoki | USSR Tangelo | Med mandarin | Willowleaf mandarin | Yamabuki | Yamamikan | Yatsushiro | Yuge hyoukan | Youpi ju | Yuukunibu | Yuzu |
|-------|-------------|--------------|-------------|-------------|-------------|--------|--------|-------|-------|-------------|----------|--------------|----------|--------|--------------|--------------|---------------------|----------|-----------|------------|--------------|----------|-----------|------|

|      |      |      |      |      |      |      |      |      |      |      |      |      |      |      |      |      |      |      |      |      |      |      |      |      |
|------|------|------|------|------|------|------|------|------|------|------|------|------|------|------|------|------|------|------|------|------|------|------|------|------|
| A146 | A147 | A162 | A172 | A174 | A175 | A183 | A186 | A187 | A188 | A191 | A192 | A196 | A197 | A198 | A199 | A200 | A201 | A202 | A203 | A204 | A205 | A206 | A207 | A208 |
| 0    | 0    | 0    | 1    | 0    | 0    | 0    | 0    | 0    | 0    | 0    | 1    | 0    | 0    | 0    | 0    | 0    | 0    | 0    | 0    | 0    | 0    | 0    | 0    | 0    |
| 14   | 12   | 6    | 22   | 20   | 19   | 13   | 11   | 10   | 9    | 14   | 21   | 18   | 7    | 8    | 3    | 11   | 8    | 1    | 7    | 8    | 9    | 13   | 0    | 22   |
| 58   | 52   | 19   | 61   | 57   | 58   | 49   | 35   | 21   | 36   | 12   | 47   | 8    | 13   | 22   | 10   | 61   | 57   | 10   | 11   | 33   | 12   | 63   | 16   | 50   |
| 28   | 29   | 10   | 33   | 30   | 34   | 25   | 21   | 9    | 19   | 8    | 26   | 14   | 7    | 3    | 7    | 29   | 24   | 5    | 6    | 7    | 4    | 30   | 7    | 36   |
| 75   | 67   | 31   | 71   | 77   | 70   | 56   | 47   | 29   | 52   | 10   | 68   | 6    | 26   | 43   | 15   | 77   | 70   | 13   | 12   | 55   | 8    | 77   | 19   | 60   |
| 11   | 14   | 7    | 23   | 12   | 22   | 13   | 5    | 13   | 8    | 53   | 21   | 76   | 8    | 16   | 22   | 5    | 6    | 15   | 19   | 9    | 18   | 9    | 15   | 24   |
| 36   | 38   | 23   | 44   | 36   | 40   | 38   | 27   | 31   | 26   | 31   | 38   | 40   | 23   | 34   | 23   | 38   | 33   | 16   | 22   | 41   | 19   | 37   | 20   | 31   |
| 19   | 17   | 9    | 15   | 10   | 21   | 11   | 17   | 8    | 21   | 33   | 14   | 47   | 11   | 13   | 23   | 20   | 20   | 11   | 13   | 12   | 14   | 24   | 16   | 21   |
| 11   | 11   | 0    | 29   | 28   | 29   | 8    | 1    | 11   | 8    | 51   | 28   | 73   | 14   | 23   | 30   | 8    | 0    | 21   | 10   | 21   | 27   | 15   | 23   | 35   |
| 6    | 15   | 13   | 19   | 17   | 18   | 17   | 14   | 25   | 0    | 61   | 22   | 84   | 17   | 21   | 30   | 9    | 8    | 16   | 29   | 21   | 24   | 8    | 22   | 32   |
| 7    | 17   | 0    | 27   | 23   | 25   | 7    | 3    | 13   | 6    | 41   | 24   | 67   | 7    | 19   | 19   | 7    | 0    | 16   | 9    | 16   | 20   | 14   | 15   | 30   |
| 27   | 25   | 12   | 20   | 13   | 22   | 25   | 22   | 16   | 20   | 11   | 13   | 25   | 15   | 9    | 19   | 31   | 27   | 12   | 9    | 23   | 16   | 34   | 16   | 24   |
| 6    | 21   | 6    | 24   | 18   | 21   | 6    | 9    | 15   | 10   | 56   | 28   | 79   | 18   | 26   | 30   | 8    | 8    | 21   | 15   | 13   | 25   | 9    | 16   | 32   |
| 81   | 71   | 35   | 77   | 79   | 76   | 62   | 49   | 33   | 57   | 15   | 67   | 13   | 34   | 48   | 18   | 80   | 74   | 25   | 23   | 59   | 15   | 80   | 31   | 59   |
| 11   | 3    | 14   | 8    | 4    | 10   | 15   | 13   | 20   | 11   | 46   | 10   | 71   | 5    | 6    | 16   | 9    | 6    | 5    | 23   | 5    | 14   | 10   | 13   | 22   |
| 20   | 26   | 5    | 28   | 24   | 28   | 18   | 11   | 6    | 11   | 20   | 22   | 30   | 12   | 9    | 11   | 19   | 16   | 10   | 7    | 14   | 19   | 25   | 10   | 26   |
| 7    | 20   | 10   | 17   | 22   | 19   | 0    | 10   | 20   | 8    | 53   | 27   | 79   | 11   | 24   | 25   | 8    | 3    | 17   | 21   | 18   | 24   | 13   | 21   | 30   |
| 12   | 11   | 13   | 5    | 8    | 1    | 15   | 15   | 17   | 15   | 45   | 13   | 64   | 8    | 7    | 20   | 14   | 13   | 14   | 16   | 23   | 18   | 17   | 14   | 17   |
| 30   | 32   | 0    | 37   | 39   | 43   | 15   | 5    | 9    | 1    | 12   | 30   | 10   | 5    | 18   | 10   | 27   | 26   | 7    | 4    | 25   | 8    | 34   | 11   | 34   |
| 31   | 22   | 34   | 0    | 14   | 9    | 36   | 32   | 41   | 29   | 53   | 21   | 79   | 32   | 14   | 40   | 30   | 30   | 28   | 43   | 34   | 34   | 34   | 36   | 2    |
| 28   | 30   | 9    | 36   | 32   | 36   | 24   | 19   | 6    | 15   | 7    | 28   | 11   | 7    | 10   | 11   | 30   | 26   | 6    | 7    | 4    | 7    | 35   | 11   | 37   |
| 12   | 16   | 13   | 28   | 24   | 24   | 17   | 11   | 11   | 16   | 41   | 16   | 59   | 6    | 16   | 16   | 10   | 7    | 10   | 20   | 14   | 12   | 17   | 13   | 2    |
| 5    | 13   | 6    | 29   | 25   | 27   | 6    | 5    | 9    | 9    | 53   | 22   | 79   | 13   | 22   | 23   | 10   | 5    | 18   | 12   | 11   | 27   | 14   | 19   | 33   |
| 75   | 67   | 27   | 77   | 79   | 76   | 57   | 43   | 22   | 53   | 6    | 66   | 10   | 28   | 41   | 11   | 76   | 69   | 15   | 15   | 52   | 10   | 78   | 20   | 58   |
| 36   | 31   | 11   | 45   | 37   | 42   | 36   | 19   | 11   | 28   | 13   | 34   | 14   | 12   | 18   | 10   | 36   | 33   | 7    | 10   | 19   | 9    | 40   | 12   | 34   |
| 26   | 27   | 6    | 33   | 30   | 34   | 13   | 13   | 3    | 13   | 12   | 15   | 15   | 3    | 9    | 4    | 21   | 17   | 9    | 6    | 19   | 5    | 29   | 9    | 31   |
| 25   | 23   | 15   | 17   | 12   | 0    | 26   | 25   | 7    | 25   | 17   | 14   | 27   | 15   | 13   | 14   | 26   | 28   | 10   | 14   | 18   | 15   | 29   | 18   | 19   |
| 43   | 41   | 34   | 41   | 39   | 39   | 41   | 35   | 40   | 34   | 44   | 41   | 56   | 29   | 29   | 35   | 40   | 38   | 28   | 31   | 43   | 30   | 43   | 35   | 21   |
| 47   | 39   | 24   | 49   | 47   | 44   | 42   | 35   | 26   | 38   | 24   | 37   | 28   | 18   | 30   | 24   | 52   | 47   | 16   | 21   | 38   | 17   | 57   | 21   | 1    |
| 7    | 20   | 5    | 25   | 22   | 24   | 12   | 8    | 13   | 6    | 21   | 24   | 30   | 7    | 14   | 15   | 12   | 11   | 8    | 10   | 4    | 8    | 12   | 5    | 26   |
| 27   | 26   | 11   | 42   | 35   | 35   | 26   | 17   | 24   | 16   | 37   | 36   | 45   | 11   | 17   | 21   | 29   | 27   | 14   | 19   | 24   | 19   | 36   | 22   | 3    |
| 28   | 23   | 17   | 28   | 24   | 24   | 32   | 24   | 15   | 24   | 20   | 26   | 33   | 7    | 13   | 12   | 34   | 31   | 13   | 11   | 21   | 9    | 38   | 16   | 0    |

|    |    |    |    |    |    |    |    |    |    |    |    |    |    |    |    |    |    |    |    |    |    |    |    |    |
|----|----|----|----|----|----|----|----|----|----|----|----|----|----|----|----|----|----|----|----|----|----|----|----|----|
| 18 | 25 | 7  | 30 | 21 | 31 | 21 | 18 | 17 | 14 | 38 | 21 | 58 | 8  | 20 | 19 | 22 | 20 | 18 | 18 | 18 | 20 | 27 | 16 | 1  |
| 24 | 17 | 14 | 12 | 6  | 12 | 26 | 28 | 15 | 22 | 20 | 8  | 46 | 8  | 3  | 20 | 26 | 27 | 10 | 15 | 9  | 18 | 29 | 21 | 24 |
| 45 | 37 | 9  | 46 | 47 | 42 | 39 | 32 | 8  | 27 | 8  | 36 | 12 | 9  | 4  | 13 | 45 | 40 | 0  | 8  | 6  | 11 | 49 | 7  | 43 |
| 22 | 21 | 9  | 20 | 17 | 16 | 18 | 21 | 8  | 16 | 22 | 18 | 42 | 10 | 9  | 15 | 26 | 24 | 12 | 12 | 4  | 16 | 26 | 18 | 25 |
| 40 | 27 | 14 | 40 | 35 | 36 | 32 | 25 | 12 | 29 | 12 | 30 | 5  | 0  | 20 | 12 | 37 | 32 | 9  | 8  | 27 | 0  | 41 | 9  | 33 |
| 19 | 18 | 13 | 20 | 13 | 21 | 19 | 18 | 10 | 21 | 28 | 10 | 58 | 8  | 4  | 17 | 23 | 21 | 17 | 14 | 9  | 15 | 27 | 17 | 29 |
| 33 | 27 | 20 | 16 | 20 | 16 | 34 | 31 | 29 | 29 | 22 | 26 | 29 | 15 | 19 | 21 | 35 | 34 | 12 | 16 | 21 | 15 | 40 | 16 | 16 |
| 20 | 13 | 11 | 21 | 17 | 23 | 12 | 20 | 10 | 14 | 35 | 16 | 59 | 10 | 16 | 16 | 15 | 12 | 13 | 13 | 12 | 20 | 14 | 13 | 24 |
| 35 | 33 | 8  | 39 | 34 | 41 | 26 | 23 | 9  | 24 | 11 | 28 | 16 | 11 | 10 | 14 | 35 | 31 | 12 | 16 | 6  | 9  | 38 | 17 | 40 |
| 7  | 0  | 11 | 20 | 14 | 16 | 12 | 9  | 20 | 8  | 54 | 19 | 80 | 0  | 18 | 15 | 4  | 3  | 5  | 23 | 0  | 13 | 9  | 5  | 25 |
| 15 | 22 | 8  | 34 | 25 | 28 | 23 | 20 | 13 | 12 | 35 | 25 | 55 | 8  | 14 | 18 | 21 | 22 | 16 | 17 | 8  | 21 | 26 | 23 | 2  |
| 10 | 16 | 13 | 25 | 12 | 22 | 15 | 19 | 17 | 11 | 60 | 19 | 82 | 13 | 25 | 26 | 8  | 8  | 19 | 20 | 21 | 26 | 9  | 16 | 29 |
| 13 | 0  | 10 | 5  | 2  | 9  | 18 | 17 | 17 | 13 | 42 | 13 | 66 | 11 | 9  | 27 | 16 | 15 | 8  | 16 | 16 | 17 | 18 | 22 | 19 |
| 24 | 20 | 27 | 11 | 12 | 8  | 28 | 28 | 36 | 27 | 52 | 27 | 75 | 25 | 26 | 32 | 24 | 25 | 27 | 37 | 34 | 31 | 25 | 31 | 2  |
| 11 | 14 | 13 | 18 | 18 | 20 | 12 | 11 | 14 | 8  | 15 | 22 | 25 | 8  | 12 | 9  | 10 | 9  | 7  | 8  | 16 | 7  | 12 | 9  | 20 |
| 10 | 16 | 1  | 24 | 21 | 23 | 12 | 5  | 2  | 4  | 16 | 8  | 35 | 5  | 0  | 7  | 9  | 5  | 6  | 4  | 0  | 11 | 13 | 12 | 30 |
| 16 | 11 | 21 | 9  | 5  | 9  | 20 | 19 | 22 | 18 | 43 | 12 | 63 | 12 | 6  | 21 | 16 | 17 | 12 | 20 | 22 | 16 | 20 | 15 | 16 |
| 38 | 32 | 22 | 42 | 32 | 38 | 37 | 25 | 32 | 23 | 41 | 35 | 52 | 23 | 29 | 28 | 35 | 33 | 21 | 26 | 40 | 24 | 36 | 27 | 33 |
| 23 | 26 | 13 | 35 | 28 | 32 | 31 | 18 | 19 | 22 | 36 | 29 | 48 | 17 | 17 | 23 | 22 | 17 | 16 | 19 | 23 | 20 | 24 | 24 | 30 |
| 15 | 27 | 28 | 26 | 18 | 23 | 30 | 23 | 33 | 22 | 60 | 28 | 71 | 26 | 25 | 35 | 16 | 18 | 29 | 36 | 27 | 30 | 18 | 28 | 29 |
| 81 | 65 | 25 | 75 | 76 | 75 | 61 | 42 | 24 | 50 | 11 | 67 | 8  | 27 | 39 | 8  | 80 | 71 | 15 | 13 | 49 | 7  | 81 | 22 | 57 |
| 55 | 51 | 55 | 55 | 53 | 51 | 58 | 54 | 52 | 53 | 64 | 54 | 70 | 46 | 49 | 50 | 55 | 54 | 40 | 51 | 58 | 40 | 55 | 49 | 35 |
| 23 | 30 | 21 | 36 | 32 | 34 | 26 | 25 | 20 | 24 | 45 | 28 | 58 | 16 | 24 | 25 | 19 | 22 | 24 | 24 | 23 | 22 | 25 | 22 | 27 |
| 17 | 25 | 9  | 30 | 25 | 26 | 26 | 17 | 14 | 20 | 35 | 21 | 57 | 6  | 19 | 17 | 18 | 18 | 16 | 15 | 16 | 17 | 21 | 14 | 2  |
| 11 | 16 | 6  | 27 | 14 | 26 | 9  | 15 | 8  | 9  | 46 | 15 | 65 | 12 | 20 | 23 | 8  | 9  | 20 | 11 | 12 | 23 | 10 | 13 | 32 |
| 18 | 10 | 11 | 26 | 22 | 22 | 17 | 13 | 8  | 16 | 10 | 25 | 5  | 4  | 14 | 7  | 18 | 13 | 9  | 8  | 11 | 0  | 21 | 6  | 21 |
| 12 | 13 | 5  | 22 | 19 | 21 | 14 | 9  | 7  | 8  | 15 | 17 | 11 | 6  | 10 | 6  | 11 | 9  | 6  | 6  | 6  | 6  | 12 | 7  | 22 |
| 13 | 14 | 9  | 30 | 24 | 28 | 14 | 10 | 21 | 9  | 46 | 27 | 61 | 9  | 20 | 18 | 12 | 11 | 13 | 21 | 7  | 18 | 12 | 11 | 32 |
| 18 | 16 | 12 | 21 | 0  | 20 | 20 | 18 | 11 | 15 | 22 | 15 | 45 | 13 | 17 | 12 | 18 | 20 | 11 | 11 | 18 | 21 | 18 | 12 | 27 |
| 25 | 22 | 4  | 32 | 24 | 31 | 20 | 15 | 12 | 8  | 21 | 27 | 21 | 5  | 20 | 15 | 15 | 15 | 15 | 10 | 9  | 13 | 26 | 15 | 26 |
| 14 | 15 | 12 | 25 | 18 | 24 | 17 | 14 | 14 | 12 | 26 | 22 | 36 | 9  | 12 | 11 | 16 | 12 | 10 | 13 | 8  | 10 | 15 | 9  | 25 |
| 5  | 14 | 4  | 23 | 18 | 20 | 8  | 3  | 10 | 4  | 47 | 24 | 72 | 12 | 20 | 27 | 7  | 6  | 18 | 11 | 8  | 20 | 10 | 19 | 26 |
| 11 | 22 | 8  | 25 | 19 | 24 | 0  | 14 | 14 | 16 | 50 | 23 | 77 | 21 | 26 | 24 | 15 | 14 | 16 | 20 | 19 | 31 | 15 | 21 | 38 |
| 80 | 72 | 33 | 78 | 81 | 75 | 62 | 50 | 27 | 53 | 14 | 68 | 13 | 31 | 46 | 16 | 82 | 73 | 19 | 17 | 53 | 15 | 83 | 23 | 64 |
| 23 | 13 | 16 | 13 | 8  | 14 | 22 | 20 | 23 | 20 | 35 | 10 | 55 | 8  | 6  | 19 | 25 | 22 | 15 | 18 | 29 | 10 | 30 | 17 | 19 |
| 19 | 7  | 12 | 23 | 22 | 22 | 20 | 17 | 6  | 12 | 17 | 23 | 24 | 4  | 9  | 10 | 16 | 12 | 3  | 9  | 5  | 4  | 25 | 1  | 25 |
| 16 | 18 | 6  | 29 | 22 | 27 | 11 | 12 | 12 | 8  | 29 | 12 | 48 | 8  | 11 | 0  | 9  | 8  | 9  | 14 | 5  | 25 | 14 | 6  | 33 |
| 19 | 24 | 14 | 15 | 21 | 21 | 18 | 20 | 20 | 15 | 18 | 18 | 27 | 10 | 17 | 10 | 19 | 18 | 10 | 15 | 19 | 8  | 15 | 13 | 28 |
| 6  | 12 | 17 | 5  | 5  | 9  | 16 | 17 | 26 | 12 | 54 | 1  | 79 | 14 | 1  | 28 | 9  | 8  | 11 | 27 | 18 | 23 | 5  | 19 | 22 |
| 7  | 10 | 21 | 5  | 5  | 4  | 20 | 17 | 28 | 12 | 53 | 6  | 77 | 13 | 4  | 27 | 11 | 12 | 18 | 27 | 15 | 21 | 13 | 18 | 17 |
| 17 | 10 | 7  | 23 | 23 | 26 | 14 | 14 | 13 | 11 | 17 | 23 | 23 | 8  | 15 | 14 | 15 | 14 | 13 | 16 | 0  | 6  | 19 | 9  | 29 |
| 9  | 8  | 12 | 22 | 15 | 22 | 14 | 14 | 20 | 9  | 58 | 22 | 80 | 6  | 22 | 20 | 5  | 4  | 10 | 25 | 14 | 17 | 11 | 12 | 29 |
| 17 | 22 | 12 | 32 | 21 | 28 | 23 | 14 | 18 | 15 | 21 | 23 | 26 | 13 | 18 | 13 | 18 | 16 | 12 | 12 | 18 | 10 | 21 | 15 | 21 |
| 18 | 21 | 18 | 20 | 8  | 17 | 20 | 21 | 23 | 18 | 44 | 22 | 65 | 16 | 20 | 21 | 18 | 18 | 19 | 24 | 23 | 23 | 16 | 24 | 3  |
| 70 | 63 | 19 | 66 | 67 | 67 | 46 | 35 | 19 | 44 | 0  | 51 | 12 | 24 | 34 | 7  | 70 | 61 | 20 | 10 | 45 | 8  | 74 | 26 | 55 |
| 0  | 14 | 11 | 17 | 15 | 19 | 12 | 9  | 22 | 9  | 62 | 23 | 86 | 16 | 24 | 30 | 3  | 3  | 15 | 23 | 17 | 28 | 7  | 18 | 27 |



|    |    |    |    |    |    |    |    |    |    |    |    |    |    |    |    |    |    |    |    |    |    |    |    |    |
|----|----|----|----|----|----|----|----|----|----|----|----|----|----|----|----|----|----|----|----|----|----|----|----|----|
| 14 | 0  | 20 | 15 | 12 | 15 | 21 | 18 | 24 | 17 | 52 | 24 | 73 | 12 | 15 | 30 | 11 | 10 | 13 | 29 | 11 | 18 | 17 | 17 | 27 |
| 11 | 20 | 0  | 27 | 23 | 30 | 0  | 0  | 0  | 0  | 14 | 21 | 33 | 5  | 11 | 9  | 14 | 11 | 8  | 0  | 4  | 14 | 18 | 12 | 32 |
| 17 | 15 | 27 | 0  | 4  | 2  | 26 | 26 | 38 | 22 | 57 | 15 | 84 | 23 | 11 | 35 | 18 | 18 | 20 | 39 | 26 | 28 | 18 | 30 | 23 |
| 15 | 12 | 23 | 4  | 0  | 7  | 22 | 23 | 33 | 22 | 55 | 9  | 85 | 18 | 5  | 32 | 18 | 17 | 21 | 31 | 27 | 23 | 16 | 24 | 25 |
| 19 | 15 | 30 | 2  | 7  | 0  | 25 | 27 | 38 | 24 | 58 | 20 | 80 | 20 | 15 | 36 | 17 | 16 | 22 | 38 | 27 | 28 | 18 | 25 | 19 |
| 12 | 21 | 0  | 26 | 22 | 25 | 0  | 10 | 5  | 12 | 40 | 24 | 64 | 16 | 23 | 18 | 10 | 10 | 20 | 8  | 16 | 26 | 13 | 17 | 34 |
| 9  | 18 | 0  | 26 | 23 | 27 | 10 | 0  | 7  | 5  | 35 | 20 | 53 | 11 | 26 | 20 | 7  | 3  | 13 | 12 | 16 | 21 | 20 | 15 | 34 |
| 22 | 24 | 0  | 38 | 33 | 38 | 5  | 7  | 0  | 6  | 13 | 20 | 28 | 7  | 12 | 4  | 19 | 19 | 8  | 1  | 15 | 13 | 27 | 13 | 30 |
| 9  | 17 | 0  | 22 | 22 | 24 | 12 | 5  | 6  | 0  | 40 | 19 | 62 | 11 | 17 | 20 | 12 | 9  | 12 | 9  | 12 | 23 | 14 | 16 | 32 |
| 62 | 52 | 14 | 57 | 55 | 58 | 40 | 35 | 13 | 40 | 0  | 40 | 12 | 15 | 20 | 12 | 63 | 55 | 13 | 5  | 32 | 4  | 65 | 21 | 46 |
| 23 | 24 | 21 | 15 | 9  | 20 | 24 | 20 | 20 | 19 | 40 | 1  | 73 | 17 | 7  | 25 | 19 | 21 | 20 | 25 | 25 | 25 | 22 | 28 | 32 |
| 86 | 73 | 33 | 84 | 85 | 80 | 64 | 53 | 28 | 62 | 12 | 73 | 0  | 29 | 44 | 19 | 84 | 77 | 19 | 15 | 55 | 8  | 87 | 26 | 65 |
| 16 | 12 | 5  | 23 | 18 | 20 | 16 | 11 | 7  | 11 | 15 | 17 | 29 | 0  | 5  | 5  | 15 | 9  | 7  | 8  | 5  | 0  | 18 | 8  | 25 |
| 24 | 15 | 11 | 11 | 5  | 15 | 23 | 26 | 12 | 17 | 20 | 7  | 44 | 5  | 0  | 14 | 24 | 22 | 8  | 11 | 9  | 18 | 27 | 15 | 24 |
| 30 | 30 | 9  | 35 | 32 | 36 | 18 | 20 | 4  | 20 | 12 | 25 | 19 | 5  | 14 | 0  | 27 | 23 | 9  | 7  | 19 | 7  | 30 | 6  | 33 |
| 3  | 11 | 14 | 18 | 18 | 17 | 10 | 7  | 19 | 12 | 63 | 19 | 84 | 15 | 24 | 27 | 0  | 3  | 17 | 26 | 14 | 27 | 0  | 17 | 30 |
| 3  | 10 | 11 | 18 | 17 | 16 | 10 | 3  | 19 | 9  | 55 | 21 | 77 | 9  | 22 | 23 | 3  | 0  | 12 | 22 | 13 | 22 | 2  | 12 | 29 |
| 15 | 13 | 8  | 20 | 21 | 22 | 20 | 13 | 8  | 12 | 13 | 20 | 19 | 7  | 8  | 9  | 17 | 12 | 0  | 10 | 14 | 5  | 17 | 4  | 25 |
| 23 | 29 | 0  | 39 | 31 | 38 | 8  | 12 | 1  | 9  | 5  | 25 | 15 | 8  | 11 | 7  | 26 | 22 | 10 | 0  | 16 | 6  | 29 | 13 | 33 |
| 17 | 11 | 4  | 26 | 27 | 27 | 16 | 16 | 15 | 12 | 32 | 25 | 55 | 5  | 9  | 19 | 14 | 13 | 14 | 16 | 0  | 19 | 19 | 10 | 33 |
| 28 | 18 | 14 | 28 | 23 | 28 | 26 | 21 | 13 | 23 | 4  | 25 | 8  | 0  | 18 | 7  | 27 | 22 | 5  | 6  | 19 | 0  | 29 | 12 | 30 |
| 7  | 17 | 18 | 18 | 16 | 18 | 13 | 20 | 27 | 14 | 65 | 22 | 87 | 18 | 27 | 30 | 0  | 2  | 17 | 29 | 19 | 29 | 0  | 20 | 34 |
| 18 | 17 | 12 | 30 | 24 | 25 | 17 | 15 | 13 | 16 | 21 | 28 | 26 | 8  | 15 | 6  | 17 | 12 | 4  | 13 | 10 | 12 | 20 | 0  | 28 |
| 27 | 27 | 32 | 23 | 25 | 19 | 34 | 34 | 30 | 32 | 46 | 32 | 65 | 25 | 24 | 33 | 30 | 29 | 25 | 33 | 33 | 30 | 34 | 28 | 0  |
