# Supplementary material for: Hybrid Origins of Citrus Varieties Inferred from DNA Marker Analysis of Nuclear and Organelle Genomes
Source: PubMed Central journal article supplement (PMC5130255; doi:10.1371/journal.pone.0166969), 2016-11-30
Supplement: pone.0166969.s014.pdf [file pone.0166969.s014.pdf]

S11 Table. Representative genotypes of the 22 indigenous citrus varieties and their inferred parental varieties

| #   | Marker   | Parent 1          | Parent 2      | Offspring        |
|-----|----------|-------------------|---------------|------------------|
|     |          | A049<br>Kaikoukan | A059<br>Kishu | A001<br>Andoukan |
| 12  | CUBER939 | 205/214           | 209/214       | 205/214          |
| 13  | CUBER951 | 158/161           | 149/155       | 155/158          |
| 19  | GSR10S17 | 124/161           | 124/149       | 149/161          |
| 33  | GSR3138  | 132/162           | 132/137       | 137/162          |
| 43  | GSR6122  | 195/208           | 208/213       | 208/213          |
| 45  | GSR6133  | 262/274           | 256/274       | 256/262          |
| 48  | NSX23    | 245/247           | 245/246       | 246/247          |
| 53  | NSX43    | 131/160           | 160/167       | 131/167          |
| 62  | NSX121   | 212/223           | 208/212       | 212/223          |
| 68  | NSX153   | 138/141           | 141/147       | 141/141          |
| 69  | NSX156   | 207/216           | 216/219       | 207/219          |
| 73  | NSX169   | 162/171           | 171/182       | 162/182          |
| 74  | NSX170   | 177/183           | 171/183       | 171/177          |
| 81  | TSRA101  | 169/183           | 165/183       | 169/183          |
| 82  | TSRA103  | 174/188           | 184/188       | 174/188          |
| 86  | TSRA110  | 145/152           | 160/161       | 152/160          |
| 87  | TSRA117  | 161/164           | 160/161       | 160/164          |
| 112 | SSR07A20 | 198/201           | 195/198       | 195/201          |
| 113 | SSR07B01 | 130/135           | 133/135       | 130/135          |
| 122 | SSR08A06 | 120/214           | 120/128       | 124/128          |
| 132 | SSR08B20 | 146/153           | 148/151       | 146/151          |
| 138 | SSR08B29 | 159/165           | 159/168       | 165/168          |
| 148 | SSR08B62 | 262/280           | 262/269       | 262/269          |
| 156 | SSR08B85 | 185/194           | 185/191       | 185/191          |
| 159 | SSR08B92 | 127/130           | 130/138       | 130/130          |
| 160 | SSR08B95 | 161/164           | 152/161       | 152/164          |
| 173 | TSRB11   | 225/234           | 228/234       | 225/228          |
| 182 | TSRF136  | 203/214           | 206/214       | 203/206          |
| 187 | TSRF161  | 246/254           | 246/249       | 246/249          |
| 191 | TSRF169  | 302/304           | 299/304       | 302/304          |
| 207 | TSRF229  | 281/283           | 278/283       | 281/283          |
| 216 | CiBE0447 | 309/325           | 325/328       | 309/328          |
| 217 | CiBE1644 | 366/378           | 378/394       | 366/378          |
| 224 | CX2004   | 196/199           | 202/206       | 196/206          |
| 227 | CX2040   | 106/110           | 110/114       | 106/110          |
| 228 | CX3001   | 423/426           | 417/423       | 417/426          |

| #   | Marker   | Parent 1                    | Parent 2             | Offspring          |
|-----|----------|-----------------------------|----------------------|--------------------|
|     |          | A201<br>Willowleaf mandarin | A162<br>Sweet orange | A009<br>Clementine |
| 1   | CTVR01   | 301/313                     | 298/313              | 301/313            |
| 12  | CUBER939 | 209/213                     | 209/214              | 209/213            |
| 19  | GSR10S17 | 124/149                     | 149/161              | 124/149            |
| 51  | NSX38    | 245/249                     | 239/247              | 245/247            |
| 53  | NSX43    | 153/160                     | 131/167              | 160/167            |
| 69  | NSX156   | 204/216                     | 204/207              | 204/216            |
| 73  | NSX169   | 171/182                     | 162/182              | 162/182            |
| 82  | TSRA103  | 184/204                     | 188/192              | 184/192            |
| 86  | TSRA110  | 152/175                     | 145/161              | 145/175            |
| 105 | SSR07A05 | 131/140                     | 137/140              | 131/140            |
| 112 | SSR07A20 | 195/198                     | 198/200              | 198/200            |
| 118 | SSR07B27 | 182/185                     | 188/191              | 185/188            |
| 132 | SSR08B20 | 150/153                     | 151/153              | 153/153            |
| 148 | SSR08B62 | 263/269                     | 262/274              | 269/274            |
| 152 | SSR08B75 | 176/189                     | 176/193              | 176/193            |
| 156 | SSR08B85 | 191/200                     | 185/191              | 191/191            |
| 160 | SSR08B95 | 152/164                     | 161/164              | 164/164            |
| 173 | TSRB11   | 228/234                     | 225/234              | 234/234            |
| 216 | CiBE0447 | 309/328                     | 319/328              | 309/328            |
| 218 | CiBE2165 | 287/298                     | 281/287              | 287/287            |
| 224 | CX2004   | 202/206                     | 199/206              | 202/206            |
| 234 | CX5039   | 437/442                     | 432/437              | 437/437            |

| #   | Marker   | Parent 1                    | Parent 2             | Offspring              |
|-----|----------|-----------------------------|----------------------|------------------------|
|     |          | A201<br>Willowleaf mandarin | A162<br>Sweet orange | A014<br>Cravo mandarin |
| 1   | CTVR01   | 301/313                     | 298/313              | 313/313                |
| 12  | CUBER939 | 209/213                     | 209/214              | 209/214                |
| 19  | GSR10S17 | 124/149                     | 149/161              | 124/149                |
| 51  | NSX38    | 245/249                     | 239/247              | 245/247                |
| 53  | NSX43    | 153/160                     | 131/167              | 131/160                |
| 69  | NSX156   | 204/216                     | 204/207              | 204/204                |
| 73  | NSX169   | 171/182                     | 162/182              | 182/182                |
| 82  | TSRA103  | 184/204                     | 188/192              | 188/204                |
| 86  | TSRA110  | 152/175                     | 145/161              | 152/161                |
| 105 | SSR07A05 | 131/140                     | 137/140              | 137/140                |
| 112 | SSR07A20 | 195/198                     | 198/200              | 198/200                |
| 118 | SSR07B27 | 182/185                     | 188/191              | 182/188                |
| 132 | SSR08B20 | 150/153                     | 151/153              | 151/153                |
| 148 | SSR08B62 | 263/269                     | 262/274              | 263/274                |
| 152 | SSR08B75 | 176/189                     | 176/193              | 176/176                |
| 156 | SSR08B85 | 191/200                     | 185/191              | 191/200                |
| 160 | SSR08B95 | 152/164                     | 161/164              | 152/164                |
| 173 | TSRB11   | 228/234                     | 225/234              | 234/234                |
| 216 | CiBE0447 | 309/328                     | 319/328              | 309/328                |

| #   | Marker   | Parent 1      | Parent 2            | Offspring        |
|-----|----------|---------------|---------------------|------------------|
|     |          | A085<br>Lemon | A141<br>Sour orange | A006<br>Bergamot |
| 1   | CTVR01   | 292/313       | 298/313             | 298/313          |
| 8   | CUBER918 | 93/102        | 102/105             | 102/105          |
| 17  | GRW3011  | 84/90         | 87/90               | 87/90            |
| 19  | GSR10S17 | 161/167       | 124/161             | 161/167          |
| 28  | GSR3121  | 141/144       | 144/152             | 144/152          |
| 31  | GSR3136  | 98/117        | 117/126             | 117/126          |
| 33  | GSR3138  | 151/164       | 134/164             | 151/164          |
| 34  | GSR3140  | 177/184       | 177/180             | 177/177          |
| 42  | GSR6101  | 210/231       | 210/237             | 210/210          |
| 43  | GSR6122  | 176/208       | 195/208             | 176/195          |
| 48  | NSX23    | 243/246       | 246/247             | 243/246          |
| 51  | NSX38    | 239/247       | 235/247             | 235/239          |
| 53  | NSX43    | 125/167       | 131/167             | 131/167          |
| 62  | NSX121   | 202/208       | 208/218             | 208/218          |
| 66  | NSX145   | 129/138       | 128/138             | 128/138          |
| 72  | NSX165   | 285/295       | 275/285             | 285/295          |
| 73  | NSX169   | 150/162       | 162/171             | 150/162          |
| 82  | TSRA103  | 185/188       | 174/188             | 174/185          |
| 86  | TSRA110  | 153/161       | 145/161             | 145/153          |
| 87  | TSRA117  | 157/163       | 160/163             | 157/163          |
| 89  | TSGR264  | 84/167        | 113/167             | 84/113           |
| 105 | SSR07A05 | 134/142       | 131/142             | 134/142          |
| 111 | SSR07A24 | 143/147       | 147/156             | 147/156          |
| 112 | SSR07A20 | 192/195       | 195/200             | 195/200          |
| 117 | SSR07B14 | 205/217       | 205/211             | 205/205          |
| 118 | SSR07B27 | 179/185       | 185/197             | 185/197          |
| 129 | SSR08B06 | 118/121       | 115/121             | 118/121          |
| 131 | SSR08B15 | 89/95         | 89/98               | 89/89            |
| 132 | SSR08B20 | 139/145       | 145/146             | 145/146          |
| 152 | SSR08B75 | 176/189       | 172/189             | 176/189          |
| 159 | SSR08B92 | 124/132       | 132/138             | 132/132          |
| 160 | SSR08B95 | 158/161       | 152/161             | 152/158          |
| 166 | TSGR905  | 241/243       | 241/242             | 242/243          |
| 172 | TSRB09   | 130/133       | 130/136             | 130/136          |
| 175 | TSRB38   | 197/211       | 206/211             | 211/211          |
| 176 | TSRB39   | 364/376       | 364/370             | 370/376          |
| 178 | TSRF105  | 251/265       | 259/265             | 265/265          |
| 181 | TSRF124  | 436/438       | 438/442             | 438/438          |
| 184 | TSRF144  | 214/223       | 217/223             | 214/217          |
| 185 | TSRF157  | 288/293       | 288/290             | 288/288          |
| 188 | TSRF162  | 177/186       | 182/186             | 186/186          |
| 189 | TSRF164  | 224/225       | 225/230             | 224/225          |
| 196 | TSRF192  | 178/180       | 175/178             | 178/180          |
| 202 | TSRF211  | 229/240       | 229/234             | 229/234          |
| 203 | TSRF215  | 232/238       | 238/243             | 238/243          |
| 213 | TSRP06   | 204/206       | 202/204             | 204/204          |
| 215 | CiBE0246 | 230/236       | 233/236             | 236/236          |
| 216 | CiBE0447 | 316/325       | 309/325             | 316/325          |
| 217 | CiBE1644 | 366/369       | 366/387             | 366/387          |
| 218 | CiBE2165 | 285/298       | 285/323             | 285/285          |
| 219 | CiBE2227 | 162/176       | 160/176             | 162/176          |
| 220 | CiBE4265 | 242/253       | 249/253             | 242/253          |
| 224 | CX2004   | 199/217       | 199/202             | 199/217          |
| 227 | CX2040   | 102/103       | 102/114             | 102/102          |
| 228 | CX3001   | 417/430       | 417/426             | 417/430          |
| 234 | CX5039   | 417/437       | 432/437             | 437/437          |
| 236 | CX6035   | 246/258       | 246/252             | 246/252          |

| #   | Marker   | Parent 1      | Parent 2     | Offspring            |
|-----|----------|---------------|--------------|----------------------|
|     |          | A059<br>Kishu | A076<br>Koji | A019<br>Fukure mikan |
| 1   | CTVR01   | 313/320       | 301/304      | 301/313              |
| 13  | CUBER951 | 149/155       | 158/161      | 149/161              |
| 19  | GSR10S17 | 124/149       | 137/149      | 149/149              |
| 42  | GSR6101  | 210/211       | 210/249      | 210/210              |
| 45  | GSR6133  | 256/274       | 274/280      | 274/280              |
| 48  | NSX23    | 245/246       | 245/253      | 245/246              |
| 51  | NSX38    | 249/253       | 247/251      | 249/251              |
| 62  | NSX121   | 208/212       | 210/220      | 212/220              |
| 69  | NSX156   | 216/219       | 204/219      | 219/219              |
| 73  | NSX169   | 171/182       | 162/165      | 165/171              |
| 74  | NSX170   | 171/183       | 171/177      | 177/183              |
| 82  | TSRA103  | 184/188       | 188/192      | 188/192              |
| 86  | TSRA110  | 160/161       | 152/161      | 152/160              |
| 87  | TSRA117  | 160/161       | 162/170      | 160/162              |
| 105 | SSR07A05 | 131/140       | 131/134      | 131/134              |
| 113 | SSR07B01 | 133/135       | 131/135      | 131/135              |
| 137 | SSR08B28 | 180/184       | 180/183      | 183/184              |
| 148 | SSR08B62 | 262/269       | 257/262      | 262/269              |
| 152 | SSR08B75 | 176/185       | 185/189      | 185/185              |

|     |          |         |         |         |
|-----|----------|---------|---------|---------|
| 218 | CiBE2165 | 287/298 | 281/287 | 281/287 |
| 224 | CX2004   | 202/206 | 199/206 | 199/206 |
| 234 | CX5039   | 437/442 | 432/437 | 432/437 |

| #   | Marker   | Parent 1     | Parent 2            | Offspring      |
|-----|----------|--------------|---------------------|----------------|
|     |          | A208<br>Yuzu | A172<br>Tachibana-A | A027<br>Hanayu |
| 13  | CUBER951 | 155/161      | 158/164             | 155/164        |
| 17  | GRW3011  | 87/100       | 87/90               | 90/100         |
| 28  | GSR3121  | 144/158      | 144/152             | 144/158        |
| 31  | GSR3136  | 110/117      | 123/129             | 110/123        |
| 42  | GSR6101  | 210/231      | 210/211             | 211/231        |
| 45  | GSR6133  | 268/286      | 256/280             | 268/280        |
| 46  | GSR6135  | 170/176      | 176/183             | 170/176        |
| 48  | NSX23    | 245/247      | 245/246             | 245/245        |
| 49  | NSX32    | 252/261      | 252/253             | 253/261        |
| 51  | NSX38    | 235/251      | 245/249             | 235/249        |
| 72  | NSX165   | 290/316      | 286/300             | 290/300        |
| 80  | SRPE05   | 175/180      | 180/186             | 180/180        |
| 82  | TSRA103  | 185/196      | 192/200             | 185/200        |
| 89  | TSGR264  | 113/128      | 128/134             | 113/128        |
| 129 | SSR08B06 | 112/118      | 115/121             | 118/121        |
| 131 | SSR08B15 | 95/98        | 95/101              | 95/95          |
| 132 | SSR08B20 | 143/145      | 150/153             | 145/153        |
| 137 | SSR08B28 | 167/179      | 126/184             | 126/167        |
| 138 | SSR08B29 | 156/159      | 159/162             | 156/159        |
| 140 | SSR08B32 | 82/92        | 96/99               | 82/99          |
| 153 | SSR08B78 | 131/140      | 131/137             | 131/131        |
| 156 | SSR08B85 | 177/191      | 183/191             | 177/183        |
| 157 | SSR08B88 | 257/265      | 268/271             | 257/271        |
| 169 | TSR8EM24 | 146/156      | 156/159             | 146/159        |
| 172 | TSRB09   | 122/133      | 133/136             | 122/133        |
| 174 | TSRB29   | 162/168      | 162/165             | 165/168        |
| 191 | TSRF169  | 299/304      | 304/307             | 304/304        |
| 196 | TSRF192  | 168/171      | 171/175             | 168/175        |
| 207 | TSRF229  | 278/283      | 283/286             | 283/283        |
| 212 | TSRN214  | 134/140      | 140/146             | 140/140        |
| 216 | CiBE0447 | 319/334      | 319/325             | 319/334        |
| 217 | CiBE1644 | 369/381      | 369/394             | 369/369        |
| 219 | CiBE2227 | 165/170      | 164/167             | 165/167        |
| 220 | CiBE4265 | 237/249      | 249/253             | 237/249        |
| 221 | CX0004   | 273/276      | 273/279             | 273/276        |
| 224 | CX2004   | 201/204      | 208/214             | 204/214        |
| 227 | CX2040   | 108/116      | 126/128             | 116/126        |
| 228 | CX3001   | 416/423      | 423/426             | 416/426        |
| 237 | CX6037   | 165/177      | 153/165             | 153/177        |
| 244 | F40      | 80/95        | 80/90               | 80/80          |
| 246 | F79      | 169/172      | 172/174             | 172/172        |

| #   | Marker   | Parent 1          | Parent 2      | Offspring   |
|-----|----------|-------------------|---------------|-------------|
|     |          | A049<br>Kaikoukan | A016<br>Dancy | A044<br>Iyo |
| 4   | CUBER410 | 253/264           | 253/260       | 253/264     |
| 12  | CUBER939 | 205/214           | 209/214       | 205/214     |
| 13  | CUBER951 | 158/161           | 149/161       | 149/158     |
| 33  | GSR3138  | 132/162           | 134/137       | 137/162     |
| 34  | GSR3140  | 168/177           | 168/180       | 168/177     |
| 49  | NSX32    | 248/252           | 252/259       | 252/252     |
| 53  | NSX43    | 131/160           | 153/167       | 131/167     |
| 62  | NSX121   | 212/223           | 208/220       | 212/220     |
| 69  | NSX156   | 207/216           | 204/216       | 204/207     |
| 73  | NSX169   | 162/171           | 179/182       | 162/182     |
| 74  | NSX170   | 177/183           | 174/177       | 177/183     |
| 81  | TSRA101  | 169/183           | 165/183       | 169/183     |
| 82  | TSRA103  | 174/188           | 177/184       | 174/177     |
| 86  | TSRA110  | 145/152           | 152/161       | 145/161     |
| 113 | SSR07B01 | 130/135           | 131/135       | 130/131     |
| 122 | SSR08A06 | 120/124           | 120/128       | 124/128     |
| 132 | SSR08B20 | 146/153           | 151/153       | 146/151     |
| 150 | SSR08B66 | 96/108            | 96/113        | 96/96       |
| 156 | SSR08B85 | 185/194           | 185/191       | 185/191     |
| 176 | TSRB39   | 367/370           | 364/396       | 364/370     |
| 184 | TSRF144  | 220/234           | 220/223       | 220/223     |
| 221 | CX0004   | 261/273           | 273/276       | 261/273     |
| 224 | CX2004   | 196/199           | 206/208       | 196/206     |
| 227 | CX2040   | 106/110           | 110/112       | 110/112     |

| #  | Marker   | Parent 1          | Parent 2     | Offspring      |
|----|----------|-------------------|--------------|----------------|
|    |          | A081<br>Kunenbo-A | A208<br>Yuzu | A045<br>Jabara |
| 1  | CTVR01   | 298/313           | 304/326      | 298/304        |
| 12 | CUBER939 | 209/214           | 196/214      | 196/209        |
| 13 | CUBER951 | 149/161           | 155/161      | 149/161        |
| 17 | GRW3011  | 87/90             | 87/100       | 90/100         |
| 19 | GSR10S17 | 124/161           | 137/149      | 149/161        |
| 33 | GSR3138  | 132/155           | 126/132      | 126/155        |
| 34 | GSR3140  | 168/177           | 165/174      | 174/177        |
| 42 | GSR6101  | 210/243           | 210/231      | 231/243        |
| 45 | GSR6133  | 268/274           | 268/286      | 268/274        |
| 51 | NSX38    | 239/249           | 235/251      | 249/251        |

|     |          |         |         |         |
|-----|----------|---------|---------|---------|
| 153 | SSR08B78 | 134/137 | 131/134 | 131/137 |
| 159 | SSR08B92 | 130/138 | 132/138 | 130/138 |
| 172 | TSRB09   | 133/136 | 122/133 | 133/133 |
| 198 | TSRF195  | 163/169 | 158/169 | 158/169 |
| 216 | CiBE0447 | 325/328 | 319/325 | 319/325 |
| 219 | CiBE2227 | 164/170 | 164/167 | 167/170 |
| 224 | CX2004   | 202/206 | 206/212 | 202/212 |
| 227 | CX2040   | 110/114 | 114/126 | 110/126 |
| 228 | CX3001   | 417/423 | 423/426 | 423/426 |

| #   | Marker   | Parent 1          | Parent 2     | Offspring           |
|-----|----------|-------------------|--------------|---------------------|
|     |          | A081<br>Kunenbo-A | A208<br>Yuzu | A030<br>Henka mikan |
| 1   | CTVR01   | 298/313           | 304/326      | 313/326             |
| 12  | CUBER939 | 209/214           | 196/214      | 196/209             |
| 13  | CUBER951 | 149/161           | 155/161      | 149/161             |
| 17  | GRW3011  | 87/90             | 87/100       | 87/90               |
| 19  | GSR10S17 | 124/161           | 137/149      | 124/137             |
| 33  | GSR3138  | 132/155           | 126/132      | 132/132             |
| 34  | GSR3140  | 168/177           | 165/174      | 165/168             |
| 42  | GSR6101  | 210/243           | 210/231      | 210/210             |
| 45  | GSR6133  | 268/274           | 268/286      | 268/268             |
| 51  | NSX38    | 239/249           | 235/251      | 235/249             |
| 63  | NSX132   | 154/161           | 154/168      | 161/168             |
| 70  | NSX160   | 162/168           | 156/162      | 156/168             |
| 72  | NSX165   | 278/300           | 290/316      | 278/290             |
| 73  | NSX169   | 162/171           | 153/174      | 153/171             |
| 81  | TSRA101  | 165/183           | 169/174      | 165/174             |
| 82  | TSRA103  | 184/188           | 185/196      | 184/185             |
| 86  | TSRA110  | 152/161           | 145/161      | 161/161             |
| 87  | TSRA117  | 161/170           | 161/174      | 161/174             |
| 89  | TSGR264  | 113/137           | 113/128      | 113/137             |
| 110 | SSR07A23 | 164/182           | 184/193      | 182/193             |
| 113 | SSR07B01 | 133/135           | 130/131      | 130/133             |
| 117 | SSR07B14 | 205/211           | 208/211      | 205/208             |
| 118 | SSR07B27 | 176/191           | 188/191      | 191/191             |
| 124 | SSR08A09 | 94/102            | 94/110       | 94/110              |
| 126 | SSR08A15 | 135/138           | 132/135      | 132/135             |
| 127 | SSR08A16 | 141/144           | 138/141      | 138/141             |
| 129 | SSR08B06 | 115/121           | 112/118      | 115/118             |
| 131 | SSR08B15 | 89/95             | 95/98        | 95/95               |
| 132 | SSR08B20 | 151/153           | 143/145      | 143/153             |
| 137 | SSR08B28 | 180/184           | 167/179      | 167/184             |
| 138 | SSR08B29 | 159/171           | 156/159      | 159/171             |
| 140 | SSR08B32 | 92/102            | 82/92        | 92/102              |
| 152 | SSR08B75 | 176/185           | 176/189      | 176/176             |
| 153 | SSR08B78 | 131/134           | 131/140      | 134/140             |
| 156 | SSR08B85 | 191/194           | 177/191      | 191/191             |
| 157 | SSR08B88 | 265/274           | 257/265      | 265/274             |
| 159 | SSR08B92 | 130/135           | 135/141      | 135/135             |
| 160 | SSR08B95 | 161/164           | 149/152      | 152/161             |
| 161 | SSR11A06 | 240/255           | 255/258      | 240/258             |
| 172 | TSRB09   | 130/136           | 122/133      | 133/136             |
| 174 | TSRB29   | 162/165           | 162/168      | 165/168             |
| 176 | TSRB39   | 364/367           | 364/376      | 364/376             |
| 181 | TSRF124  | 436/442           | 436/438      | 436/436             |
| 182 | TSRF136  | 206/214           | 194/206      | 194/214             |
| 184 | TSRF144  | 220/234           | 223/229      | 229/234             |
| 188 | TSRF162  | 182/186           | 186/189      | 186/189             |
| 196 | TSRF192  | 171/175           | 168/171      | 171/175             |
| 200 | TSRF204  | 203/206           | 200/206      | 200/206             |
| 203 | TSRF215  | 238/243           | 235/243      | 238/243             |
| 208 | TSRF230  | 212/224           | 212/215      | 215/224             |
| 210 | TSRF237  | 177/183           | 171/177      | 171/183             |
| 215 | CiBE0246 | 233/236           | 230/233      | 233/233             |
| 216 | CiBE0447 | 325/328           | 319/334      | 328/334             |
| 217 | CiBE1644 | 366/378           | 369/381      | 366/381             |
| 218 | CiBE2165 | 281/298           | 285/289      | 289/298             |
| 219 | CiBE2227 | 160/170           | 165/170      | 160/165             |
| 224 | CX2004   | 196/206           | 201/204      | 201/206             |
| 227 | CX2040   | 110/118           | 108/116      | 110/116             |
| 228 | CX3001   | 420/423           | 416/423      | 416/423             |
| 230 | CX4005   | 368/372           | 368/369      | 368/368             |
| 237 | CX6037   | 165/171           | 165/177      | 165/165             |
| 238 | CX6F21   | 146/152           | 140/146      | 140/146             |
| 244 | F40      | 90/99             | 80/95        | 95/99               |

| #  | Marker   | Parent 1          | Parent 2     | Offspring      |
|----|----------|-------------------|--------------|----------------|
|    |          | A081<br>Kunenbo-A | A208<br>Yuzu | A047<br>Kabosu |
| 1  | CTVR01   | 298/313           | 304/326      | 304/313        |
| 12 | CUBER939 | 209/214           | 196/214      | 214/214        |
| 13 | CUBER951 | 149/161           | 155/161      | 161/161        |
| 17 | GRW3011  | 87/90             | 87/100       | 87/100         |
| 19 | GSR10S17 | 124/161           | 137/149      | 137/161        |
| 33 | GSR3138  | 132/155           | 126/132      | 132/155        |
| 34 | GSR3140  | 168/177           | 165/174      | 165/177        |
| 42 | GSR6101  | 210/243           | 210/231      | 210/231        |
| 45 | GSR6133  | 268/274           | 268/286      | 274/286        |
| 51 | NSX38    | 239/249           | 235/251      | 235/239        |

|     |          |         |         |         |
|-----|----------|---------|---------|---------|
| 63  | NSX132   | 154/161 | 154/168 | 161/168 |
| 70  | NSX160   | 162/168 | 156/162 | 156/168 |
| 72  | NSX165   | 278/300 | 290/316 | 278/316 |
| 73  | NSX169   | 162/171 | 153/174 | 153/162 |
| 81  | TSRA101  | 165/183 | 169/174 | 165/174 |
| 82  | TSRA103  | 184/188 | 185/196 | 184/185 |
| 86  | TSRA110  | 152/161 | 145/161 | 152/161 |
| 87  | TSRA117  | 161/170 | 161/174 | 170/174 |
| 89  | TSGR264  | 113/137 | 113/128 | 113/128 |
| 110 | SSR07A23 | 164/182 | 184/193 | 182/193 |
| 113 | SSR07B01 | 133/135 | 130/131 | 131/133 |
| 117 | SSR07B14 | 205/211 | 208/211 | 205/208 |
| 118 | SSR07B27 | 176/191 | 188/191 | 188/191 |
| 124 | SSR08A09 | 94/102  | 94/110  | 94/102  |
| 126 | SSR08A15 | 135/138 | 132/135 | 132/138 |
| 127 | SSR08A16 | 141/144 | 138/141 | 138/144 |
| 129 | SSR08B06 | 115/121 | 112/118 | 118/121 |
| 131 | SSR08B15 | 89/95   | 95/98   | 89/98   |
| 132 | SSR08B20 | 151/153 | 143/145 | 143/151 |
| 137 | SSR08B28 | 180/184 | 167/179 | 179/180 |
| 138 | SSR08B29 | 159/171 | 156/159 | 156/159 |
| 140 | SSR08B32 | 92/102  | 82/92   | 82/92   |
| 152 | SSR08B75 | 176/185 | 176/189 | 185/189 |
| 153 | SSR08B78 | 131/134 | 131/140 | 134/140 |
| 156 | SSR08B85 | 191/194 | 177/191 | 177/194 |
| 157 | SSR08B88 | 265/274 | 257/265 | 257/265 |
| 159 | SSR08B92 | 130/135 | 135/141 | 135/135 |
| 160 | SSR08B95 | 161/164 | 149/152 | 152/161 |
| 161 | SSR11A06 | 240/255 | 255/258 | 240/258 |
| 172 | TSRB09   | 130/136 | 122/133 | 122/130 |
| 174 | TSRB29   | 162/165 | 162/168 | 162/162 |
| 176 | TSRB39   | 364/367 | 364/376 | 364/364 |
| 181 | TSRF124  | 436/442 | 436/438 | 436/436 |
| 182 | TSRF136  | 206/214 | 194/206 | 206/206 |
| 184 | TSRF144  | 220/234 | 223/229 | 220/223 |
| 188 | TSRF162  | 182/186 | 186/189 | 186/189 |
| 196 | TSRF192  | 171/175 | 168/171 | 168/171 |
| 200 | TSRF204  | 203/206 | 200/206 | 200/203 |
| 203 | TSRF215  | 238/243 | 235/243 | 235/238 |
| 208 | TSRF230  | 212/224 | 212/215 | 215/224 |
| 215 | CiBE0246 | 233/236 | 230/233 | 230/236 |
| 216 | CiBE0447 | 325/328 | 319/334 | 325/334 |
| 217 | CiBE1644 | 366/378 | 369/381 | 366/369 |
| 218 | CiBE2165 | 281/298 | 285/289 | 289/298 |
| 219 | CiBE2227 | 160/170 | 165/170 | 160/165 |
| 224 | CX2004   | 196/206 | 201/204 | 201/206 |
| 227 | CX2040   | 110/118 | 108/116 | 108/118 |
| 228 | CX3001   | 420/423 | 416/423 | 423/423 |
| 230 | CX4005   | 368/372 | 368/369 | 368/369 |
| 237 | CX6037   | 165/171 | 165/177 | 171/177 |
| 238 | CX6F21   | 146/152 | 140/146 | 140/146 |
| 244 | F40      | 90/99   | 80/95   | 80/90   |

|     |          |         |         |         |
|-----|----------|---------|---------|---------|
| 63  | NSX132   | 154/161 | 154/168 | 154/168 |
| 70  | NSX160   | 162/168 | 156/162 | 156/162 |
| 72  | NSX165   | 278/300 | 290/316 | 290/300 |
| 73  | NSX169   | 162/171 | 153/174 | 162/174 |
| 81  | TSRA101  | 165/183 | 169/174 | 174/183 |
| 82  | TSRA103  | 184/188 | 185/196 | 185/188 |
| 86  | TSRA110  | 152/161 | 145/161 | 145/152 |
| 87  | TSRA117  | 161/170 | 161/174 | 161/170 |
| 89  | TSGR264  | 113/137 | 113/128 | 113/128 |
| 110 | SSR07A23 | 164/182 | 184/193 | 164/184 |
| 113 | SSR07B01 | 133/135 | 130/131 | 130/135 |
| 117 | SSR07B14 | 205/211 | 208/211 | 211/211 |
| 118 | SSR07B27 | 176/191 | 188/191 | 176/191 |
| 124 | SSR08A09 | 94/102  | 94/110  | 94/102  |
| 126 | SSR08A15 | 135/138 | 132/135 | 135/138 |
| 127 | SSR08A16 | 141/144 | 138/141 | 141/144 |
| 129 | SSR08B06 | 115/121 | 112/118 | 115/118 |
| 131 | SSR08B15 | 89/95   | 95/98   | 95/98   |
| 132 | SSR08B20 | 151/153 | 143/145 | 143/153 |
| 137 | SSR08B28 | 180/184 | 167/179 | 179/180 |
| 138 | SSR08B29 | 159/171 | 156/159 | 159/159 |
| 140 | SSR08B32 | 92/102  | 82/92   | 92/92   |
| 152 | SSR08B75 | 176/185 | 176/189 | 185/189 |
| 153 | SSR08B78 | 131/134 | 131/140 | 131/134 |
| 156 | SSR08B85 | 191/194 | 177/191 | 177/191 |
| 157 | SSR08B88 | 265/274 | 257/265 | 265/265 |
| 159 | SSR08B92 | 130/135 | 135/141 | 130/135 |
| 160 | SSR08B95 | 161/164 | 149/152 | 149/164 |
| 161 | SSR11A06 | 240/255 | 255/258 | 240/258 |
| 172 | TSRB09   | 130/136 | 122/133 | 122/136 |
| 174 | TSRB29   | 162/165 | 162/168 | 162/162 |
| 176 | TSRB39   | 364/367 | 364/376 | 364/367 |
| 181 | TSRF124  | 436/442 | 436/438 | 436/438 |
| 182 | TSRF136  | 206/214 | 194/206 | 194/206 |
| 184 | TSRF144  | 220/234 | 223/229 | 220/223 |
| 188 | TSRF162  | 182/186 | 186/189 | 186/186 |
| 196 | TSRF192  | 171/175 | 168/171 | 171/171 |
| 200 | TSRF204  | 203/206 | 200/206 | 203/206 |
| 203 | TSRF215  | 238/243 | 235/243 | 235/243 |
| 208 | TSRF230  | 212/224 | 212/215 | 212/215 |
| 210 | TSRF237  | 177/183 | 171/177 | 177/183 |
| 215 | CiBE0246 | 233/236 | 230/233 | 233/236 |
| 216 | CiBE0447 | 325/328 | 319/334 | 319/325 |
| 217 | CiBE1644 | 366/378 | 369/381 | 369/378 |
| 218 | CiBE2165 | 281/298 | 285/289 | 285/298 |
| 219 | CiBE2227 | 160/170 | 165/170 | 165/170 |
| 224 | CX2004   | 196/206 | 201/204 | 201/206 |
| 227 | CX2040   | 110/118 | 108/116 | 110/116 |
| 228 | CX3001   | 420/423 | 416/423 | 416/423 |
| 230 | CX4005   | 368/372 | 368/369 | 368/372 |
| 237 | CX6037   | 165/171 | 165/177 | 165/177 |
| 238 | CX6F21   | 146/152 | 140/146 | 140/152 |
| 244 | F40      | 90/99   | 80/95   | 80/99   |

| #   | Marker   | Parent 1        | Parent 2          | Offspring      |
|-----|----------|-----------------|-------------------|----------------|
|     |          | A048<br>Kabuchi | A081<br>Kunenbo-A | A052<br>Keraji |
| 1   | CTVR01   | 298/301         | 298/313           | 301/313        |
| 8   | CUBER918 | 99/105          | 102/105           | 99/102         |
| 13  | CUBER951 | 149/158         | 149/161           | 149/161        |
| 19  | GSR10S17 | 124/149         | 124/161           | 124/149        |
| 34  | GSR3140  | 162/168         | 168/177           | 162/168        |
| 42  | GSR6101  | 211/243         | 210/243           | 210/211        |
| 45  | GSR6133  | 274/280         | 268/274           | 268/280        |
| 46  | GSR6135  | 176/183         | 170/176           | 176/183        |
| 51  | NSX38    | 239/251         | 239/249           | 239/251        |
| 69  | NSX156   | 216/222         | 207/216           | 207/222        |
| 70  | NSX160   | 156/162         | 162/168           | 156/162        |
| 72  | NSX165   | 285/300         | 278/300           | 278/300        |
| 73  | NSX169   | 165/171         | 162/171           | 162/171        |
| 89  | TSGR264  | 113/128         | 113/137           | 113/128        |
| 111 | SSR07A24 | 153/156         | 147/153           | 147/156        |
| 113 | SSR07B01 | 131/135         | 133/135           | 133/135        |
| 115 | SSR07B08 | 187/190         | 190/193           | 190/190        |
| 118 | SSR07B27 | 185/191         | 176/191           | 185/191        |
| 132 | SSR08B20 | 150/153         | 151/153           | 150/151        |
| 136 | SSR08B27 | 96/102          | 96/105            | 102/105        |
| 137 | SSR08B28 | 180/195         | 180/184           | 180/195        |
| 140 | SSR08B32 | 92/99           | 92/102            | 99/102         |
| 148 | SSR08B62 | 257/262         | 262/274           | 257/262        |
| 156 | SSR08B85 | 194/200         | 191/194           | 191/200        |
| 157 | SSR08B88 | 265/271         | 265/274           | 271/274        |
| 159 | SSR08B92 | 130/138         | 130/135           | 130/135        |
| 160 | SSR08B95 | 152/161         | 161/164           | 152/164        |
| 163 | SSR11A27 | 216/233         | 222/233           | 216/222        |
| 172 | TSRB09   | 130/133         | 130/136           | 133/136        |
| 175 | TSRB38   | 206/208         | 206/211           | 206/208        |
| 178 | TSRF105  | 259/262         | 259/265           | 259/262        |
| 184 | TSRF144  | 220/226         | 220/234           | 220/226        |
| 187 | TSRF161  | 246/249         | 249/254           | 249/254        |
| 198 | TSRF195  | 158/169         | 163/169           | 163/169        |
| 200 | TSRF204  | 206/209         | 203/206           | 206/206        |

| #   | Marker   | Parent 1          | Parent 2     | Offspring    |
|-----|----------|-------------------|--------------|--------------|
|     |          | A081<br>Kunenbo-A | A208<br>Yuzu | A073<br>Kizu |
| 1   | CTVR01   | 298/313           | 304/326      | 298/304      |
| 12  | CUBER939 | 209/214           | 196/214      | 196/214      |
| 13  | CUBER951 | 149/161           | 155/161      | 161/161      |
| 17  | GRW3011  | 87/90             | 87/100       | 87/100       |
| 19  | GSR10S17 | 124/161           | 137/149      | 124/149      |
| 33  | GSR3138  | 132/155           | 126/132      | 126/132      |
| 34  | GSR3140  | 168/177           | 165/174      | 168/174      |
| 42  | GSR6101  | 210/243           | 210/231      | 231/243      |
| 45  | GSR6133  | 268/274           | 268/286      | 268/274      |
| 51  | NSX38    | 239/249           | 235/251      | 249/251      |
| 63  | NSX132   | 154/161           | 154/168      | 154/168      |
| 70  | NSX160   | 162/168           | 156/162      | 156/168      |
| 72  | NSX165   | 278/300           | 290/316      | 300/316      |
| 73  | NSX169   | 162/171           | 153/174      | 153/171      |
| 81  | TSRA101  | 165/183           | 169/174      | 174/183      |
| 82  | TSRA103  | 184/188           | 185/196      | 185/188      |
| 86  | TSRA110  | 152/161           | 145/161      | 145/161      |
| 87  | TSRA117  | 161/170           | 161/174      | 161/174      |
| 89  | TSGR264  | 113/137           | 113/128      | 113/128      |
| 110 | SSR07A23 | 164/182           | 184/193      | 182/193      |
| 113 | SSR07B01 | 133/135           | 130/131      | 130/135      |
| 117 | SSR07B14 | 205/211           | 208/211      | 205/208      |
| 118 | SSR07B27 | 176/191           | 188/191      | 188/191      |
| 124 | SSR08A09 | 94/102            | 94/110       | 94/102       |
| 126 | SSR08A15 | 135/138           | 132/135      | 132/135      |
| 127 | SSR08A16 | 141/144           | 138/141      | 138/141      |
| 129 | SSR08B06 | 115/121           | 112/118      | 112/115      |
| 131 | SSR08B15 | 89/95             | 95/98        | 89/98        |
| 132 | SSR08B20 | 151/153           | 143/145      | 143/153      |
| 137 | SSR08B28 | 180/184           | 167/179      | 179/180      |
| 138 | SSR08B29 | 159/171           | 156/159      | 159/159      |
| 140 | SSR08B32 | 92/102            | 82/92        | 92/92        |
| 152 | SSR08B75 | 176/185           | 176/189      | 176/176      |
| 153 | SSR08B78 | 131/134           | 131/140      | 134/140      |
| 156 | SSR08B85 | 191/194           | 177/191      | 177/194      |

|     |          |         |         |         |
|-----|----------|---------|---------|---------|
| 216 | CiBE0447 | 319/325 | 325/328 | 319/325 |
| 218 | CiBE2165 | 281/294 | 281/298 | 294/298 |
| 219 | CiBE2227 | 167/170 | 160/170 | 160/170 |
| 224 | CX2004   | 196/212 | 196/206 | 196/212 |
| 227 | CX2040   | 102/118 | 110/118 | 118/118 |
| 234 | CX5039   | 432/442 | 432/437 | 437/442 |
| 237 | CX6037   | 153/171 | 165/171 | 153/165 |
| 244 | F40      | 80/90   | 90/99   | 80/99   |

|     |          |         |         |         |
|-----|----------|---------|---------|---------|
| 157 | SSR08B88 | 265/274 | 257/265 | 265/265 |
| 159 | SSR08B92 | 130/135 | 135/141 | 135/141 |
| 160 | SSR08B95 | 161/164 | 149/152 | 149/161 |
| 161 | SSR11A06 | 240/255 | 255/258 | 240/258 |
| 172 | TSRB09   | 130/136 | 122/133 | 122/130 |
| 174 | TSRB29   | 162/165 | 162/168 | 165/168 |
| 176 | TSRB39   | 364/367 | 364/376 | 364/367 |
| 181 | TSRF124  | 436/442 | 436/438 | 436/436 |
| 182 | TSRF136  | 206/214 | 194/206 | 206/214 |
| 184 | TSRF144  | 220/234 | 223/229 | 220/223 |
| 188 | TSRF162  | 182/186 | 186/189 | 186/189 |
| 196 | TSRF192  | 171/175 | 168/171 | 168/175 |
| 200 | TSRF204  | 203/206 | 200/206 | 200/206 |
| 203 | TSRF215  | 238/243 | 235/243 | 235/243 |
| 208 | TSRF230  | 212/224 | 212/215 | 212/215 |
| 210 | TSRF237  | 177/183 | 171/177 | 177/183 |
| 215 | CiBE0246 | 233/236 | 230/233 | 230/233 |
| 216 | CiBE0447 | 325/328 | 319/334 | 325/334 |
| 217 | CiBE1644 | 366/378 | 369/381 | 369/378 |
| 218 | CiBE2165 | 281/298 | 285/289 | 289/298 |
| 219 | CiBE2227 | 160/170 | 165/170 | 165/170 |
| 224 | CX2004   | 196/206 | 201/204 | 201/206 |
| 227 | CX2040   | 110/118 | 108/116 | 116/118 |
| 228 | CX3001   | 420/423 | 416/423 | 423/423 |
| 230 | CX4005   | 368/372 | 368/369 | 369/372 |
| 237 | CX6037   | 165/171 | 165/177 | 171/177 |
| 238 | CX6F21   | 146/152 | 140/146 | 140/152 |
| 244 | F40      | 90/99   | 80/95   | 80/90   |

| #   | Marker   | Parent 1  |         | Parent 2 |      | Offspring |  |
|-----|----------|-----------|---------|----------|------|-----------|--|
|     |          | A081      | A208    | A208     | A091 |           |  |
|     |          | Kunenbo-A | Yuzu    | Mochiyu  |      |           |  |
| 1   | CTVR01   | 298/313   | 304/326 | 313/326  |      |           |  |
| 12  | CUBER939 | 209/214   | 196/214 | 196/209  |      |           |  |
| 13  | CUBER951 | 149/161   | 155/161 | 149/161  |      |           |  |
| 17  | GRW3011  | 87/90     | 87/100  | 87/100   |      |           |  |
| 19  | GSR10S17 | 124/161   | 137/149 | 124/149  |      |           |  |
| 33  | GSR3138  | 132/155   | 126/132 | 126/132  |      |           |  |
| 34  | GSR3140  | 168/177   | 165/174 | 168/174  |      |           |  |
| 42  | GSR6101  | 210/243   | 210/231 | 210/210  |      |           |  |
| 45  | GSR6133  | 268/274   | 268/286 | 268/286  |      |           |  |
| 51  | NSX38    | 239/249   | 235/251 | 239/251  |      |           |  |
| 63  | NSX132   | 154/161   | 154/168 | 161/168  |      |           |  |
| 70  | NSX160   | 162/168   | 156/162 | 162/162  |      |           |  |
| 72  | NSX165   | 278/300   | 290/316 | 290/300  |      |           |  |
| 73  | NSX169   | 162/171   | 153/174 | 162/174  |      |           |  |
| 81  | TSRA101  | 165/183   | 169/174 | 165/174  |      |           |  |
| 82  | TSRA103  | 184/188   | 185/196 | 184/185  |      |           |  |
| 86  | TSRA110  | 152/161   | 145/161 | 152/161  |      |           |  |
| 87  | TSRA117  | 161/170   | 161/174 | 161/170  |      |           |  |
| 89  | TSGR264  | 113/137   | 113/128 | 113/128  |      |           |  |
| 110 | SSR07A23 | 164/182   | 184/193 | 164/184  |      |           |  |
| 113 | SSR07B01 | 133/135   | 130/131 | 130/133  |      |           |  |
| 117 | SSR07B14 | 205/211   | 208/211 | 211/211  |      |           |  |
| 118 | SSR07B27 | 176/191   | 188/191 | 176/188  |      |           |  |
| 124 | SSR08A09 | 94/102    | 94/110  | 94/102   |      |           |  |
| 126 | SSR08A15 | 135/138   | 132/135 | 135/138  |      |           |  |
| 127 | SSR08A16 | 141/144   | 138/141 | 141/144  |      |           |  |
| 129 | SSR08B06 | 115/121   | 112/118 | 118/121  |      |           |  |
| 131 | SSR08B15 | 89/95     | 95/98   | 95/95    |      |           |  |
| 132 | SSR08B20 | 151/153   | 143/145 | 143/151  |      |           |  |
| 137 | SSR08B28 | 180/184   | 167/179 | 179/180  |      |           |  |
| 138 | SSR08B29 | 159/171   | 156/159 | 159/171  |      |           |  |
| 140 | SSR08B32 | 92/102    | 82/92   | 92/102   |      |           |  |
| 152 | SSR08B75 | 176/185   | 176/189 | 176/176  |      |           |  |
| 153 | SSR08B78 | 131/134   | 131/140 | 131/131  |      |           |  |
| 156 | SSR08B85 | 191/194   | 177/191 | 191/191  |      |           |  |
| 157 | SSR08B88 | 265/274   | 257/265 | 265/274  |      |           |  |
| 159 | SSR08B92 | 130/135   | 135/141 | 130/135  |      |           |  |
| 160 | SSR08B95 | 161/164   | 149/152 | 152/164  |      |           |  |
| 161 | SSR11A06 | 240/255   | 255/258 | 240/255  |      |           |  |
| 172 | TSRB09   | 130/136   | 122/133 | 133/136  |      |           |  |
| 174 | TSRB29   | 162/165   | 162/168 | 165/168  |      |           |  |
| 176 | TSRB39   | 364/367   | 364/376 | 364/367  |      |           |  |
| 181 | TSRF124  | 436/442   | 436/438 | 438/442  |      |           |  |
| 182 | TSRF136  | 206/214   | 194/206 | 206/214  |      |           |  |
| 184 | TSRF144  | 220/234   | 223/229 | 220/223  |      |           |  |
| 188 | TSRF162  | 182/186   | 186/189 | 182/186  |      |           |  |
| 196 | TSRF192  | 171/175   | 168/171 | 168/175  |      |           |  |
| 200 | TSRF204  | 203/206   | 200/206 | 200/206  |      |           |  |
| 203 | TSRF215  | 238/243   | 235/243 | 235/243  |      |           |  |
| 208 | TSRF230  | 212/224   | 212/215 | 215/224  |      |           |  |
| 210 | TSRF237  | 177/183   | 171/177 | 177/177  |      |           |  |
| 215 | CiBE0246 | 233/236   | 230/233 | 230/233  |      |           |  |
| 216 | CiBE0447 | 325/328   | 319/334 | 319/328  |      |           |  |
| 217 | CiBE1644 | 366/378   | 369/381 | 369/378  |      |           |  |
| 218 | CiBE2165 | 281/298   | 285/289 | 281/285  |      |           |  |
| 219 | CiBE2227 | 160/170   | 165/170 | 160/165  |      |           |  |
| 224 | CX2004   | 196/206   | 201/204 | 196/201  |      |           |  |
| 227 | CX2040   | 110/118   | 108/116 | 116/118  |      |           |  |
| 228 | CX3001   | 420/423   | 416/423 | 416/423  |      |           |  |
| 230 | CX4005   | 368/372   | 368/369 | 369/372  |      |           |  |
| 237 | CX6037   | 165/171   | 165/177 | 165/165  |      |           |  |
| 238 | CX6F21   | 146/152   | 140/146 | 140/146  |      |           |  |
| 244 | F40      | 90/99     | 80/95   | 95/99    |      |           |  |

| #   | Marker   | Parent 1 |             | Parent 2 |       | Offspring |  |
|-----|----------|----------|-------------|----------|-------|-----------|--|
|     |          | A059     | A141        | A141     | A100  |           |  |
|     |          | Kishu    | Sour orange | Nidonari | mikan |           |  |
| 1   | CTVR01   | 313/320  | 298/313     | 298/320  |       |           |  |
| 12  | CUBER939 | 209/214  | 205/218     | 209/218  |       |           |  |
| 19  | GSR10S17 | 124/149  | 124/161     | 149/161  |       |           |  |
| 33  | GSR3138  | 132/137  | 134/164     | 137/164  |       |           |  |
| 42  | GSR6101  | 210/211  | 210/237     | 211/237  |       |           |  |
| 43  | GSR6122  | 208/213  | 195/208     | 208/213  |       |           |  |
| 48  | NSX23    | 245/246  | 246/247     | 245/246  |       |           |  |
| 51  | NSX38    | 249/253  | 235/247     | 235/249  |       |           |  |
| 53  | NSX43    | 160/167  | 131/167     | 131/167  |       |           |  |
| 62  | NSX121   | 208/212  | 208/218     | 208/212  |       |           |  |
| 69  | NSX156   | 216/219  | 207/216     | 216/219  |       |           |  |
| 70  | NSX160   | 156/168  | 162/168     | 162/168  |       |           |  |
| 73  | NSX169   | 171/182  | 162/171     | 171/182  |       |           |  |
| 74  | NSX170   | 171/183  | 177/183     | 177/183  |       |           |  |
| 81  | TSRA101  | 165/183  | 169/183     | 165/169  |       |           |  |
| 82  | TSRA103  | 184/188  | 174/188     | 184/188  |       |           |  |
| 86  | TSRA110  | 160/161  | 145/161     | 161/161  |       |           |  |
| 87  | TSRA117  | 160/161  | 160/163     | 160/160  |       |           |  |
| 105 | SSR07A05 | 131/140  | 131/142     | 140/142  |       |           |  |
| 112 | SSR07A20 | 195/198  | 195/200     | 195/200  |       |           |  |
| 113 | SSR07B01 | 133/135  | 130/131     | 130/133  |       |           |  |
| 118 | SSR07B27 | 185/191  | 185/197     | 191/197  |       |           |  |
| 122 | SSR08A06 | 120/128  | 120/124     | 120/120  |       |           |  |
| 132 | SSR08B20 | 148/151  | 145/146     | 145/148  |       |           |  |
| 137 | SSR08B28 | 180/184  | 175/180     | 175/180  |       |           |  |
| 148 | SSR08B62 | 262/269  | 269/274     | 262/274  |       |           |  |
| 152 | SSR08B75 | 176/185  | 172/189     | 172/176  |       |           |  |
| 156 | SSR08B85 | 185/191  | 179/191     | 179/185  |       |           |  |
| 159 | SSR08B92 | 130/138  | 132/138     | 130/138  |       |           |  |
| 172 | TSRB09   | 133/136  | 130/136     | 130/133  |       |           |  |
| 173 | TSRB11   | 228/234  | 225/228     | 228/234  |       |           |  |
| 191 | TSRF169  | 299/304  | 304/307     | 299/304  |       |           |  |
| 207 | TSRF229  | 278/283  | 283/286     | 278/283  |       |           |  |
| 216 | CiBE0447 | 325/328  | 309/325     | 325/328  |       |           |  |
| 217 | CiBE1644 | 378/394  | 366/387     | 378/387  |       |           |  |
| 219 | CiBE2227 | 164/170  | 160/176     | 160/170  |       |           |  |
| 224 | CX2004   | 202/206  | 199/202     | 199/206  |       |           |  |
| 227 | CX2040   | 110/114  | 102/114     | 110/114  |       |           |  |
| 228 | CX3001   | 417/423  | 417/426     | 417/423  |       |           |  |

| #  | Marker   | Parent 1  |         | Parent 2 |      | Offspring |  |
|----|----------|-----------|---------|----------|------|-----------|--|
|    |          | A049      | A059    | A059     | A112 |           |  |
|    |          | Kaikoukan | Kishu   | Sanbokan |      |           |  |
| 12 | CUBER939 | 205/214   | 209/214 | 205/214  |      |           |  |
| 13 | CUBER951 | 158/161   | 149/155 | 155/158  |      |           |  |
| 19 | GSR10S17 | 124/161   | 124/149 | 124/161  |      |           |  |
| 33 | GSR3138  | 132/162   | 132/137 | 132/162  |      |           |  |
| 43 | GSR6122  | 195/208   | 208/213 | 208/213  |      |           |  |
| 45 | GSR6133  | 262/274   | 256/274 | 256/262  |      |           |  |
| 48 | NSX23    | 245/247   | 245/246 | 245/247  |      |           |  |
| 53 | NSX43    | 131/160   | 160/167 | 131/160  |      |           |  |
| 62 | NSX121   | 212/223   | 208/212 | 208/223  |      |           |  |
| 68 | NSX153   | 138/141   | 141/147 | 141/141  |      |           |  |
| 69 | NSX156   | 207/216   | 216/219 | 216/219  |      |           |  |
| 73 | NSX169   | 162/171   | 171/182 | 162/171  |      |           |  |

| #  | Marker   | Parent 1 |           | Parent 2 |      | Offspring |  |
|----|----------|----------|-----------|----------|------|-----------|--|
|    |          | A059     | A081      | A081     | A125 |           |  |
|    |          | Kishu    | Kunenbo-A | Satsuma  |      |           |  |
| 1  | CTVR01   | 313/320  | 298/313   | 298/313  |      |           |  |
| 13 | CUBER951 | 149/155  | 149/161   | 155/161  |      |           |  |
| 19 | GSR10S17 | 124/149  | 124/161   | 149/161  |      |           |  |
| 33 | GSR3138  | 132/137  | 132/155   | 137/155  |      |           |  |
| 42 | GSR6101  | 210/211  | 210/243   | 210/243  |      |           |  |
| 45 | GSR6133  | 256/274  | 268/274   | 256/274  |      |           |  |
| 48 | NSX23    | 245/246  | 245/247   | 246/247  |      |           |  |
| 51 | NSX38    | 249/253  | 239/249   | 249/249  |      |           |  |
| 53 | NSX43    | 160/167  | 131/160   | 131/167  |      |           |  |
| 62 | NSX121   | 208/212  | 212/218   | 208/212  |      |           |  |
| 68 | NSX153   | 141/147  | 138/141   | 138/141  |      |           |  |
| 69 | NSX156   | 216/219  | 207/216   | 207/219  |      |           |  |
| 70 | NSX160   | 156/168  | 162/168   | 168/168  |      |           |  |
| 73 | NSX169   | 171/182  | 162/171   | 171/182  |      |           |  |
| 86 | TSRA110  | 160/161  | 152/161   | 152/160  |      |           |  |
| 87 | TSRA117  | 160/161  | 161/170   | 160/161  |      |           |  |

|     |          |         |         |         |
|-----|----------|---------|---------|---------|
| 74  | NSX170   | 177/183 | 171/183 | 177/183 |
| 81  | TSRA101  | 169/183 | 165/183 | 169/183 |
| 82  | TSRA103  | 174/188 | 184/188 | 174/188 |
| 86  | TSRA110  | 145/152 | 160/161 | 145/161 |
| 87  | TSRA117  | 161/164 | 160/161 | 161/164 |
| 112 | SSR07A20 | 198/201 | 195/198 | 198/201 |
| 113 | SSR07B01 | 130/135 | 133/135 | 130/135 |
| 122 | SSR08A06 | 120/124 | 120/128 | 124/128 |
| 132 | SSR08B20 | 146/153 | 148/151 | 146/148 |
| 138 | SSR08B29 | 159/165 | 159/168 | 159/168 |
| 148 | SSR08B62 | 262/280 | 262/269 | 269/280 |
| 156 | SSR08B85 | 185/194 | 185/191 | 185/191 |
| 159 | SSR08B92 | 127/130 | 130/138 | 127/138 |
| 160 | SSR08B95 | 161/164 | 152/161 | 161/161 |
| 173 | TSRB11   | 225/234 | 228/234 | 225/234 |
| 182 | TSRF136  | 203/214 | 206/214 | 203/214 |
| 187 | TSRF161  | 246/254 | 246/249 | 246/254 |
| 191 | TSRF169  | 302/304 | 299/304 | 299/302 |
| 207 | TSRF229  | 281/283 | 278/283 | 278/281 |
| 216 | CiBE0447 | 309/325 | 325/328 | 309/328 |
| 217 | CiBE1644 | 366/378 | 378/394 | 366/394 |
| 224 | CX2004   | 196/199 | 202/206 | 196/202 |
| 227 | CX2040   | 106/110 | 110/114 | 110/114 |
| 228 | CX3001   | 423/426 | 417/423 | 423/426 |

| #   | Marker   | Parent 1      | Parent 2             | Offspring       |
|-----|----------|---------------|----------------------|-----------------|
|     |          | A059<br>Kishu | A075<br>Kobeni mikan | A138<br>Sokitsu |
| 1   | CTVR01   | 313/320       | 307/313              | 307/313         |
| 13  | CUBER951 | 149/155       | 149/161              | 149/161         |
| 51  | NSX38    | 249/253       | 247/253              | 247/249         |
| 53  | NSX43    | 160/167       | 153/167              | 153/160         |
| 62  | NSX121   | 208/212       | 208/210              | 210/212         |
| 70  | NSX160   | 156/168       | 162/168              | 156/162         |
| 86  | TSRA110  | 160/161       | 152/160              | 152/161         |
| 87  | TSRA117  | 160/161       | 161/169              | 161/169         |
| 132 | SSR08B20 | 148/151       | 151/153              | 148/151         |
| 138 | SSR08B29 | 159/168       | 159/162              | 159/168         |
| 152 | SSR08B75 | 176/185       | 189/193              | 185/193         |
| 153 | SSR08B78 | 134/137       | 131/137              | 131/137         |
| 160 | SSR08B95 | 152/161       | 152/164              | 161/164         |
| 217 | CiBE1644 | 378/394       | 394/403              | 394/403         |
| 227 | CX2040   | 110/114       | 108/114              | 110/114         |

| #   | Marker   | Parent 1                    | Parent 2             | Offspring      |
|-----|----------|-----------------------------|----------------------|----------------|
|     |          | A201<br>Willowleaf mandarin | A162<br>Sweet orange | A186<br>Temple |
| 1   | CTVR01   | 301/313                     | 298/313              | 313/313        |
| 12  | CUBER939 | 209/213                     | 209/214              | 209/213        |
| 19  | GSR10S17 | 124/149                     | 149/161              | 149/161        |
| 51  | NSX38    | 245/249                     | 239/247              | 247/249        |
| 53  | NSX43    | 153/160                     | 131/167              | 131/160        |
| 69  | NSX156   | 204/216                     | 204/207              | 207/216        |
| 73  | NSX169   | 171/182                     | 162/182              | 162/171        |
| 82  | TSRA103  | 184/204                     | 188/192              | 184/192        |
| 86  | TSRA110  | 152/175                     | 145/161              | 145/175        |
| 105 | SSR07A05 | 131/140                     | 137/140              | 131/137        |
| 112 | SSR07A20 | 195/198                     | 198/200              | 195/200        |
| 132 | SSR08B20 | 150/153                     | 151/153              | 150/153        |
| 148 | SSR08B62 | 263/269                     | 262/274              | 263/274        |
| 156 | SSR08B85 | 191/200                     | 185/191              | 185/191        |
| 160 | SSR08B95 | 152/164                     | 161/164              | 161/164        |
| 173 | TSRB11   | 228/234                     | 225/234              | 225/234        |
| 218 | CiBE2165 | 287/298                     | 281/287              | 287/287        |
| 224 | CX2004   | 202/206                     | 199/206              | 199/202        |
| 234 | CX5039   | 437/442                     | 432/437              | 437/437        |

| #   | Marker   | Parent 1      | Parent 2          | Offspring          |
|-----|----------|---------------|-------------------|--------------------|
|     |          | A059<br>Kishu | A081<br>Kunenbo-A | A204<br>Yatsushiro |
| 1   | CTVR01   | 313/320       | 298/313           | 298/320            |
| 13  | CUBER951 | 149/155       | 149/161           | 155/161            |
| 19  | GSR10S17 | 124/149       | 124/161           | 124/149            |
| 33  | GSR3138  | 132/137       | 132/155           | 132/137            |
| 42  | GSR6101  | 210/211       | 210/243           | 211/243            |
| 45  | GSR6133  | 256/274       | 268/274           | 256/268            |
| 48  | NSX23    | 245/246       | 245/247           | 245/247            |
| 51  | NSX38    | 249/253       | 239/249           | 239/249            |
| 53  | NSX43    | 160/167       | 131/160           | 160/167            |
| 62  | NSX121   | 208/212       | 212/218           | 208/218            |
| 68  | NSX153   | 141/147       | 138/141           | 138/147            |
| 69  | NSX156   | 216/219       | 207/216           | 207/219            |
| 70  | NSX160   | 156/168       | 162/168           | 162/168            |
| 73  | NSX169   | 171/182       | 162/171           | 171/182            |
| 86  | TSRA110  | 160/161       | 152/161           | 161/161            |
| 87  | TSRA117  | 160/161       | 161/170           | 160/161            |
| 105 | SSR07A05 | 131/140       | 134/140           | 131/134            |

|     |          |         |         |         |
|-----|----------|---------|---------|---------|
| 105 | SSR07A05 | 131/140 | 134/140 | 134/140 |
| 112 | SSR07A20 | 195/198 | 198/200 | 195/200 |
| 118 | SSR07B27 | 185/191 | 176/191 | 176/191 |
| 132 | SSR08B20 | 148/151 | 151/153 | 148/151 |
| 138 | SSR08B29 | 159/168 | 159/171 | 168/171 |
| 148 | SSR08B62 | 262/269 | 262/274 | 262/274 |
| 153 | SSR08B78 | 134/137 | 131/134 | 131/137 |
| 156 | SSR08B85 | 185/191 | 191/194 | 191/194 |
| 159 | SSR08B92 | 130/138 | 130/135 | 130/138 |
| 160 | SSR08B95 | 152/161 | 161/164 | 152/164 |
| 172 | TSRB09   | 133/136 | 130/136 | 130/136 |
| 187 | TSRF161  | 246/249 | 249/254 | 249/254 |
| 217 | CiBE1644 | 378/394 | 366/378 | 366/394 |
| 219 | CiBE2227 | 164/170 | 160/170 | 160/170 |
| 224 | CX2004   | 202/206 | 196/206 | 196/206 |
| 227 | CX2040   | 110/114 | 110/118 | 110/118 |
| 228 | CX3001   | 417/423 | 420/423 | 417/420 |

| #   | Marker   | Parent 1      | Parent 2     | Offspring           |
|-----|----------|---------------|--------------|---------------------|
|     |          | A059<br>Kishu | A076<br>Koji | A147<br>Suruga Yuko |
| 1   | CTVR01   | 313/320       | 301/304      | 304/313             |
| 13  | CUBER951 | 149/155       | 158/161      | 155/158             |
| 19  | GSR10S17 | 124/149       | 137/149      | 124/137             |
| 42  | GSR6101  | 210/211       | 210/249      | 211/249             |
| 45  | GSR6133  | 256/274       | 274/280      | 256/274             |
| 48  | NSX23    | 245/246       | 245/253      | 245/246             |
| 51  | NSX38    | 249/253       | 247/251      | 251/253             |
| 62  | NSX121   | 208/212       | 210/220      | 212/220             |
| 69  | NSX156   | 216/219       | 204/219      | 204/219             |
| 73  | NSX169   | 171/182       | 162/165      | 165/182             |
| 74  | NSX170   | 171/183       | 171/177      | 171/171             |
| 82  | TSRA103  | 184/188       | 188/192      | 184/192             |
| 86  | TSRA110  | 160/161       | 152/161      | 152/161             |
| 87  | TSRA117  | 160/161       | 162/170      | 160/162             |
| 105 | SSR07A05 | 131/140       | 131/134      | 131/134             |
| 113 | SSR07B01 | 133/135       | 131/135      | 131/133             |
| 137 | SSR08B28 | 180/184       | 180/183      | 180/183             |
| 148 | SSR08B62 | 262/269       | 257/262      | 257/269             |
| 152 | SSR08B75 | 176/185       | 185/189      | 185/189             |
| 153 | SSR08B78 | 134/137       | 131/134      | 134/137             |
| 159 | SSR08B92 | 130/138       | 132/138      | 138/138             |
| 172 | TSRB09   | 133/136       | 122/133      | 122/133             |
| 198 | TSRF195  | 163/169       | 158/169      | 158/163             |
| 216 | CiBE0447 | 325/328       | 319/325      | 325/328             |
| 219 | CiBE2227 | 164/170       | 164/167      | 167/170             |
| 224 | CX2004   | 202/206       | 206/212      | 202/212             |
| 227 | CX2040   | 110/114       | 114/126      | 110/114             |
| 228 | CX3001   | 417/423       | 423/426      | 417/426             |

| #   | Marker   | Parent 1             | Parent 2          | Offspring     |
|-----|----------|----------------------|-------------------|---------------|
|     |          | A162<br>Sweet orange | A013<br>Cleopatra | A188<br>Tizon |
| 1   | CTVR01   | 298/313              | 301/313           | 313/313       |
| 9   | CUBER920 | 158/162              | 162/170           | 158/162       |
| 12  | CUBER939 | 209/214              | 209/213           | 213/214       |
| 31  | GSR3136  | 117/131              | 113/126           | 126/131       |
| 34  | GSR3140  | 168/177              | 168/171           | 171/177       |
| 49  | NSX32    | 252/262              | 252/259           | 259/262       |
| 51  | NSX38    | 239/247              | 249/253           | 239/249       |
| 62  | NSX121   | 208/210              | 208/212           | 210/212       |
| 82  | TSRA103  | 188/192              | 184/192           | 188/192       |
| 105 | SSR07A05 | 137/140              | 131/140           | 131/137       |
| 112 | SSR07A20 | 198/200              | 192/198           | 198/200       |
| 118 | SSR07B27 | 188/191              | 185/191           | 185/188       |
| 131 | SSR08B15 | 89/101               | 89/98             | 89/89         |
| 147 | SSR08B60 | 125/129              | 118/133           | 118/129       |
| 153 | SSR08B78 | 131/134              | 131/137           | 134/137       |
| 173 | TSRB11   | 225/234              | 228/234           | 225/234       |
| 181 | TSRF124  | 436/442              | 436/438           | 436/438       |
| 216 | CiBE0447 | 319/328              | 309/322           | 309/328       |
| 219 | CiBE2227 | 160/170              | 164/170           | 160/164       |
| 227 | CX2040   | 110/112              | 108/110           | 108/110       |
| 228 | CX3001   | 417/423              | 417/426           | 423/426       |

| #  | Marker   | Parent 1         | Parent 2         | Offspring        |
|----|----------|------------------|------------------|------------------|
|    |          | A001<br>Andoukan | A112<br>Sanbokan | A207<br>Yuuunibu |
| 8  | CUBER918 | 96/102           | 102/105          | 96/102           |
| 19 | GSR10S17 | 149/161          | 124/161          | 149/161          |
| 33 | GSR3138  | 137/162          | 132/162          | 137/162          |
| 48 | NSX23    | 246/247          | 245/247          | 246/247          |
| 51 | NSX38    | 239/249          | 239/253          | 239/249          |
| 53 | NSX43    | 131/167          | 131/160          | 131/167          |
| 62 | NSX121   | 212/223          | 208/223          | 212/223          |
| 69 | NSX156   | 207/219          | 216/219          | 207/219          |
| 70 | NSX160   | 162/168          | 156/162          | 162/168          |
| 73 | NSX169   | 162/182          | 162/171          | 162/182          |
| 74 | NSX170   | 171/177          | 177/183          | 171/177          |
| 87 | TSRA117  | 160/164          | 161/164          | 160/164          |

|     |          |         |         |         |
|-----|----------|---------|---------|---------|
| 112 | SSR07A20 | 195/198 | 198/200 | 195/198 |
| 118 | SSR07B27 | 185/191 | 176/191 | 185/191 |
| 132 | SSR08B20 | 148/151 | 151/153 | 148/151 |
| 138 | SSR08B29 | 159/168 | 159/171 | 168/171 |
| 148 | SSR08B62 | 262/269 | 262/274 | 262/269 |
| 153 | SSR08B78 | 134/137 | 131/134 | 131/137 |
| 156 | SSR08B85 | 185/191 | 191/194 | 185/194 |
| 159 | SSR08B92 | 130/138 | 130/135 | 130/135 |
| 160 | SSR08B95 | 152/161 | 161/164 | 161/161 |
| 172 | TSRB09   | 133/136 | 130/136 | 130/133 |
| 187 | TSRF161  | 246/249 | 249/254 | 246/254 |
| 217 | CiBE1644 | 378/394 | 366/378 | 378/378 |
| 219 | CiBE2227 | 164/170 | 160/170 | 160/164 |
| 224 | CX2004   | 202/206 | 196/206 | 196/202 |
| 227 | CX2040   | 110/114 | 110/118 | 110/114 |
| 228 | CX3001   | 417/423 | 420/423 | 420/423 |

|     |          |         |         |         |
|-----|----------|---------|---------|---------|
| 105 | SSR07A05 | 134/140 | 131/134 | 134/140 |
| 111 | SSR07A24 | 147/156 | 147/153 | 147/156 |
| 112 | SSR07A20 | 195/201 | 198/201 | 195/201 |
| 132 | SSR08B20 | 146/151 | 146/148 | 146/151 |
| 138 | SSR08B29 | 165/168 | 159/168 | 165/168 |
| 148 | SSR08B62 | 262/269 | 269/280 | 262/269 |
| 173 | TSRB11   | 225/228 | 225/234 | 225/228 |
| 177 | TSRF101  | 152/161 | 154/161 | 152/161 |
| 182 | TSRF136  | 203/206 | 203/214 | 203/206 |
| 187 | TSRF161  | 246/249 | 246/254 | 246/246 |
| 191 | TSRF169  | 302/304 | 299/302 | 302/304 |
| 207 | TSRF229  | 281/283 | 278/281 | 281/283 |
| 217 | CiBE1644 | 366/378 | 366/394 | 366/378 |
| 224 | CX2004   | 196/206 | 196/202 | 196/206 |
| 227 | CX2040   | 106/110 | 110/114 | 110/110 |
| 228 | CX3001   | 417/426 | 423/426 | 417/426 |
