# Supplementary material for: Hybrid Origins of Citrus Varieties Inferred from DNA Marker Analysis of Nuclear and Organelle Genomes
Source: PLoS One. 2016 Nov 30;11(11):e0166969. doi: 10.1371/journal.pone.0166969 (PMC5130255; doi:10.1371/journal.pone.0166969)
Supplement: S6 Table — (XLS) [file pone.0166969.s009.xls]

## Sheet: Sheet1
	Table S6. Genetic characteristics of all DNA markers for representative varieties/strains
	1. Observed unique genotypes for intividual markers on three sample categories								2. Observed uniqie alleles for intividual markers on three sample categories								3. Observed heterozygosity for intividual markers on three sample categories								4. Expected heterozygosity for intividual markers on three sample categories								5. Polymorphic information content for intividual markers on three sample categories								6. Match probability for intividual markers on three sample categories								7. Valid data for intividual markers on three sample categories
	No.	Cert.	Marker name	Number of genotypes					No.	Cert.	Marker name	Number of alleles					No.	Cert.	Marker name	Ho					No.	Cert.	Marker name	He					No.	Cert.	Marker name	PIC					No.	Cert.	Marker name	PM					No.
				IV	HV	SL	ALL					IV	HV	SL	ALL					IV	HV	SL	ALL					IV	HV	SL	ALL					IV	HV	SL	ALL					IV	HV	SL	ALL
	1	*	CTVR01.1	24	14	14	28		1	*	CTVR01.1	9	7	6	9		1	*	CTVR01.1	0.871	0.84	0.788	0.835		1	*	CTVR01.1	0.792	0.74	0.723	0.758		1	*	CTVR01.1	0.76	0.689	0.67	0.718		1	*	CTVR01.1	0.0896971	0.149511	0.156817	0.116895		1
	4	*	CUBER410.1	11	10	7	12		4	*	CUBER410.1	7	6	5	7		4	*	CUBER410.1	0.545	0.507	0.412	0.49		4	*	CUBER410.1	0.546	0.472	0.381	0.475		4	*	CUBER410.1	0.507	0.437	0.356	0.446		4	*	CUBER410.1	0.23282	0.315911	0.390727	0.296839		4
	8	*	CUBER918.1	13	8	7	13		8	*	CUBER918.1	5	4	4	5		8	*	CUBER918.1	0.782	0.653	0.718	0.724		8	*	CUBER918.1	0.705	0.576	0.563	0.629		8	*	CUBER918.1	0.654	0.51	0.487	0.572		8	*	CUBER918.1	0.153416	0.294578	0.337578	0.232131		8
	9	*	CUBER920.1	5	3	3	5		9	*	CUBER920.1	3	2	2	3		9	*	CUBER920.1	0.394	0.213	0.271	0.301		9	*	CUBER920.1	0.432	0.322	0.315	0.366		9	*	CUBER920.1	0.341	0.269	0.264	0.3		9	*	CUBER920.1	0.389276	0.534933	0.526367	0.461341		9
	12	*	CUBER939.1	18	9	9	18		12	*	CUBER939.1	6	4	5	6		12	*	CUBER939.1	0.733	0.72	0.729	0.728		12	*	CUBER939.1	0.746	0.668	0.677	0.712		12	*	CUBER939.1	0.705	0.603	0.611	0.665		12	*	CUBER939.1	0.121655	0.204978	0.179516	0.141645		12
	13	*	CUBER951.1	11	7	10	12		13	*	CUBER951.1	5	5	5	5		13	*	CUBER951.1	0.743	0.307	0.357	0.492		13	*	CUBER951.1	0.695	0.338	0.361	0.53		13	*	CUBER951.1	0.64	0.317	0.34	0.493		13	*	CUBER951.1	0.15322	0.489067	0.423668	0.271473		13
	14	*	GRW2011.1	4	3	3	4		14	*	GRW2011.1	3	2	2	3		14	*	GRW2011.1	0.406	0.48	0.553	0.475		14	*	GRW2011.1	0.423	0.428	0.475	0.443		14	*	GRW2011.1	0.336	0.335	0.361	0.346		14	*	GRW2011.1	0.419861	0.440356	0.433356	0.420649		14
	17	*	GRW3011.1	14	6	5	16		17	*	GRW3011.1	6	5	3	7		17	*	GRW3011.1	0.574	0.733	0.694	0.659		17	*	GRW3011.1	0.61	0.535	0.52	0.559		17	*	GRW3011.1	0.528	0.422	0.4	0.46		17	*	GRW3011.1	0.233997	0.500444	0.481799	0.367126		17
	18	*	GSR10S09.1	3	3	3	3		18	*	GSR10S09.1	2	2	2	2		18	*	GSR10S09.1	0.149	0.267	0.365	0.253		18	*	GSR10S09.1	0.171	0.306	0.343	0.271		18	*	GSR10S09.1	0.156	0.258	0.283	0.234		18	*	GSR10S09.1	0.714146	0.536356	0.494256	0.572995		18
	19	*	GSR10S17.1	14	8	7	18		19	*	GSR10S17.1	6	4	4	7		19	*	GSR10S17.1	0.782	0.693	0.635	0.709		19	*	GSR10S17.1	0.726	0.657	0.603	0.672		19	*	GSR10S17.1	0.674	0.586	0.533	0.612		19	*	GSR10S17.1	0.149691	0.198933	0.230727	0.179166		19
	20	*	GSR10S29.1	3	3	3	3		20	*	GSR10S29.1	2	2	2	2		20	*	GSR10S29.1	0.396	0.413	0.459	0.421		20	*	GSR10S29.1	0.411	0.387	0.392	0.397		20	*	GSR10S29.1	0.326	0.311	0.314	0.318		20	*	GSR10S29.1	0.42986	0.458133	0.467682	0.448922		20
	28	*	GSR3121.1	16	8	9	19		28	*	GSR3121.1	8	5	6	9		28	*	GSR3121.1	0.624	0.307	0.318	0.433		28	*	GSR3121.1	0.649	0.35	0.354	0.486		28	*	GSR3121.1	0.608	0.331	0.329	0.457		28	*	GSR3121.1	0.167729	0.5072	0.469896	0.32708		28
	30	*	GSR3128.1	5	1	1	5		30	*	GSR3128.1	4	1	1	4		30	*	GSR3128.1	0.129	0	0	0.05		30	*	GSR3128.1	0.14	0	0	0.056		30	*	GSR3128.1	0.134	0	0	0.055		30	*	GSR3128.1	0.769238	1	1	0.904376		30
	31	*	GSR3136.1	26	14	8	29		31	*	GSR3136.1	12	8	5	13		31	*	GSR3136.1	0.703	0.6	0.518	0.613		31	*	GSR3136.1	0.739	0.59	0.465	0.623		31	*	GSR3136.1	0.711	0.556	0.439	0.598		31	*	GSR3136.1	0.104598	0.210311	0.301038	0.174381		31
	33	*	GSR3138.1	27	16	17	31		33	*	GSR3138.1	8	7	7	8		33	*	GSR3138.1	0.7	0.867	0.871	0.804		33	*	GSR3138.1	0.768	0.793	0.78	0.803		33	*	GSR3138.1	0.741	0.756	0.74	0.775		33	*	GSR3138.1	0.0936183	0.101867	0.115294	0.0714758		33
	34	*	GSR3140.1	22	5	5	22		34	*	GSR3140.1	9	3	3	9		34	*	GSR3140.1	0.743	0.547	0.553	0.625		34	*	GSR3140.1	0.728	0.548	0.521	0.621		34	*	GSR3140.1	0.684	0.466	0.444	0.561		34	*	GSR3140.1	0.132438	0.28	0.312111	0.212842		34
	42	*	GSR6101.1	21	13	11	24		42	*	GSR6101.1	7	6	6	7		42	*	GSR6101.1	0.693	0.64	0.643	0.662		42	*	GSR6101.1	0.683	0.631	0.553	0.634		42	*	GSR6101.1	0.653	0.567	0.471	0.587		42	*	GSR6101.1	0.132438	0.228444	0.343391	0.203594		42
	43	*	GSR6122.1	19	4	4	20		43	*	GSR6122.1	10	4	4	10		43	*	GSR6122.1	0.515	0.173	0.141	0.295		43	*	GSR6122.1	0.558	0.161	0.135	0.331		43	*	GSR6122.1	0.52	0.151	0.13	0.313		43	*	GSR6122.1	0.257524	0.705244	0.746159	0.489761		43
	44	*	GSR6129.1	3	3	3	3		44	*	GSR6129.1	2	2	2	2		44	*	GSR6129.1	0.495	0.507	0.388	0.464		44	*	GSR6129.1	0.455	0.477	0.368	0.439		44	*	GSR6129.1	0.35	0.362	0.299	0.342		44	*	GSR6129.1	0.419665	0.404089	0.471834	0.420913		44
	45	*	GSR6133.1	18	11	14	18		45	*	GSR6133.1	6	6	6	6		45	*	GSR6133.1	0.743	0.707	0.529	0.663		45	*	GSR6133.1	0.8	0.67	0.595	0.738		45	*	GSR6133.1	0.764	0.625	0.551	0.698		45	*	GSR6133.1	0.0730321	0.197156	0.216055	0.112814		45
	46	*	GSR6135.1	16	10	9	17		46	*	GSR6135.1	8	5	5	8		46	*	GSR6135.1	0.634	0.747	0.671	0.678		46	*	GSR6135.1	0.647	0.65	0.621	0.643		46	*	GSR6135.1	0.585	0.592	0.564	0.589		46	*	GSR6135.1	0.21341	0.232	0.21218	0.205825		46
	48	*	NSX23.1	21	16	11	28		48	*	NSX23.1	10	8	6	10		48	*	NSX23.1	0.802	0.76	0.835	0.801		48	*	NSX23.1	0.75	0.699	0.68	0.721		48	*	NSX23.1	0.715	0.647	0.618	0.678		48	*	NSX23.1	0.107931	0.184711	0.256194	0.155092		48
	49	*	NSX32.1	18	11	9	24		49	*	NSX32.1	9	7	6	11		49	*	NSX32.1	0.663	0.693	0.612	0.655		49	*	NSX32.1	0.654	0.638	0.544	0.621		49	*	NSX32.1	0.628	0.585	0.501	0.589		49	*	NSX32.1	0.152044	0.220622	0.275571	0.182513		49
	51	*	NSX38.1	38	17	12	44		51	*	NSX38.1	15	8	6	15		51	*	NSX38.1	0.901	0.84	0.871	0.874		51	*	NSX38.1	0.862	0.778	0.748	0.811		51	*	NSX38.1	0.842	0.737	0.698	0.784		51	*	NSX38.1	0.0438192	0.101867	0.16263	0.0766724		51
	52	*	NSX39.1	5	4	4	6		52	*	NSX39.1	3	2	2	3		52	*	NSX39.1	0.485	0.581	0.595	0.548		52	*	NSX39.1	0.526	0.499	0.493	0.508		52	*	NSX39.1	0.41	0.373	0.37	0.388		52	*	NSX39.1	0.323596	0.418667	0.436125	0.378899		52
	53	*	NSX43.1	13	9	10	14		53	*	NSX43.1	6	4	5	6		53	*	NSX43.1	0.772	0.813	0.753	0.778		53	*	NSX43.1	0.721	0.721	0.693	0.718		53	*	NSX43.1	0.665	0.663	0.635	0.664		53	*	NSX43.1	0.146162	0.154489	0.158201	0.144111		53
	58	*	NSX82.1	6	3	4	7		58	*	NSX82.1	4	2	3	5		58	*	NSX82.1	0.465	0.573	0.588	0.536		58	*	NSX82.1	0.486	0.502	0.503	0.507		58	*	NSX82.1	0.385	0.374	0.381	0.387		58	*	NSX82.1	0.372218	0.421156	0.422837	0.38483		58
	59	*	NSX84.1	4	4	3	5		59	*	NSX84.1	3	3	2	4		59	*	NSX84.1	0.317	0.547	0.412	0.414		59	*	NSX84.1	0.387	0.522	0.496	0.499		59	*	NSX84.1	0.314	0.403	0.372	0.381		59	*	NSX84.1	0.445348	0.362489	0.349481	0.339734		59
	60	*	NSX115.1	3	3	3	3		60	*	NSX115.1	2	2	2	2		60	*	NSX115.1	0.465	0.507	0.6	0.521		60	*	NSX115.1	0.474	0.496	0.475	0.501		60	*	NSX115.1	0.36	0.371	0.361	0.375		60	*	NSX115.1	0.387707	0.3856	0.467682	0.386386		60
	62	*	NSX121.1	27	13	14	27		62	*	NSX121.1	8	6	6	8		62	*	NSX121.1	0.743	0.733	0.835	0.77		62	*	NSX121.1	0.834	0.748	0.755	0.801		62	*	NSX121.1	0.808	0.701	0.708	0.77		62	*	NSX121.1	0.063033	0.155911	0.131626	0.0887979		62
	63	*	NSX132.1	6	3	3	6		63	*	NSX132.1	4	2	2	4		63	*	NSX132.1	0.535	0.347	0.235	0.383		63	*	NSX132.1	0.561	0.306	0.261	0.448		63	*	NSX132.1	0.459	0.258	0.226	0.367		63	*	NSX132.1	0.281051	0.529956	0.588651	0.383479		63
	64	*	NSX137.1	3	3	4	4		64	*	NSX137.1	2	2	2	2		64	*	NSX137.1	0.307	0.533	0.583	0.462		64	*	NSX137.1	0.275	0.428	0.425	0.376		64	*	NSX137.1	0.236	0.335	0.333	0.305		64	*	NSX137.1	0.561023	0.468089	0.492595	0.479309		64
	65	*	NSX141.1	5	3	4	6		65	*	NSX141.1	3	2	2	3		65	*	NSX141.1	0.485	0.493	0.631	0.535		65	*	NSX141.1	0.514	0.46	0.458	0.485		65	*	NSX141.1	0.395	0.353	0.352	0.372		65	*	NSX141.1	0.343594	0.414756	0.498685	0.401271		65
	66	*	NSX145.1	7	4	5	8		66	*	NSX145.1	4	3	3	4		66	*	NSX145.1	0.356	0.293	0.298	0.319		66	*	NSX145.1	0.359	0.291	0.289	0.317		66	*	NSX145.1	0.328	0.251	0.25	0.283		66	*	NSX145.1	0.441035	0.541689	0.530242	0.496308		66
	67	*	NSX150.1	4	4	3	5		67	*	NSX150.1	3	2	2	3		67	*	NSX150.1	0.495	0.459	0.529	0.496		67	*	NSX150.1	0.504	0.409	0.44	0.466		67	*	NSX150.1	0.381	0.324	0.342	0.359		67	*	NSX150.1	0.366925	0.438933	0.453287	0.403503		67
	68	*	NSX153.1	11	7	6	11		68	*	NSX153.1	5	4	4	5		68	*	NSX153.1	0.406	0.467	0.329	0.398		68	*	NSX153.1	0.449	0.447	0.317	0.407		68	*	NSX153.1	0.422	0.414	0.294	0.382		68	*	NSX153.1	0.340261	0.343289	0.497301	0.383685		68
	69	*	NSX156.1	14	11	11	15		69	*	NSX156.1	6	6	5	7		69	*	NSX156.1	0.733	0.773	0.8	0.766		69	*	NSX156.1	0.731	0.754	0.731	0.759		69	*	NSX156.1	0.679	0.705	0.679	0.715		69	*	NSX156.1	0.124792	0.121067	0.146298	0.1043		69
	70	*	NSX160.1	6	6	5	6		70	*	NSX160.1	3	3	3	3		70	*	NSX160.1	0.683	0.48	0.341	0.513		70	*	NSX160.1	0.637	0.48	0.378	0.547		70	*	NSX160.1	0.557	0.413	0.321	0.471		70	*	NSX160.1	0.22439	0.356444	0.451073	0.285565		70
	71	*	NSX162.1	5	2	4	6		71	*	NSX162.1	3	2	2	3		71	*	NSX162.1	0.17	0.173	0.321	0.22		71	*	NSX162.1	0.168	0.159	0.287	0.207		71	*	NSX162.1	0.159	0.146	0.245	0.189		71	*	NSX162.1	0.691207	0.713422	0.535225	0.633094		71
	72	*	NSX165.1	30	15	10	32		72	*	NSX165.1	13	7	5	14		72	*	NSX165.1	0.713	0.787	0.835	0.774		72	*	NSX165.1	0.787	0.738	0.704	0.749		72	*	NSX165.1	0.755	0.688	0.643	0.708		72	*	NSX165.1	0.0900892	0.126044	0.182007	0.114135		72
	101	*	NSX169.1	25	10	9	26		101	*	NSX169.1	10	5	4	10		101	*	NSX169.1	0.822	0.653	0.588	0.697		101	*	NSX169.1	0.798	0.656	0.596	0.727		101	*	NSX169.1	0.765	0.606	0.548	0.686		101	*	NSX169.1	0.082639	0.181156	0.223529	0.121416		101
	102	*	NSX170.1	14	7	8	14		102	*	NSX170.1	7	4	4	7		102	*	NSX170.1	0.733	0.52	0.412	0.567		102	*	NSX170.1	0.717	0.523	0.428	0.593		102	*	NSX170.1	0.668	0.479	0.398	0.551		102	*	NSX170.1	0.125968	0.270756	0.36	0.207704		102
	75	*	NSX187.1	2	2	1	2		75	*	NSX187.1	2	2	1	2		75	*	NSX187.1	0.089	0.027	0	0.042		75	*	NSX187.1	0.086	0.026	0	0.041		75	*	NSX187.1	0.082	0.026	0	0.04		75	*	NSX187.1	0.837663	0.948089	1	0.919261		75
	76	*	SRPE02.1	4	2	3	4		76	*	SRPE02.1	4	2	3	4		76	*	SRPE02.1	0.505	0.293	0.282	0.372		76	*	SRPE02.1	0.387	0.252	0.246	0.306		76	*	SRPE02.1	0.321	0.219	0.217	0.263		76	*	SRPE02.1	0.471424	0.585422	0.588374	0.521939		76
	78	*	SRPE05.1	8	4	4	8		78	*	SRPE05.1	4	3	3	4		78	*	SRPE05.1	0.624	0.467	0.482	0.533		78	*	SRPE05.1	0.566	0.437	0.482	0.505		78	*	SRPE05.1	0.488	0.346	0.37	0.416		78	*	SRPE05.1	0.287129	0.4176	0.383253	0.346457		78
	79	*	TSRA101.1	13	5	5	13		79	*	TSRA101.1	6	3	3	6		79	*	TSRA101.1	0.62	0.293	0.435	0.465		79	*	TSRA101.1	0.659	0.36	0.394	0.51		79	*	TSRA101.1	0.603	0.329	0.353	0.466		79	*	TSRA101.1	0.187923	0.458133	0.40346	0.294491		79
	80	*	TSRA103.1	30	17	13	33		80	*	TSRA103.1	13	9	6	14		80	*	TSRA103.1	0.871	0.827	0.824	0.843		80	*	TSRA103.1	0.819	0.756	0.725	0.788		80	*	TSRA103.1	0.791	0.715	0.672	0.756		80	*	TSRA103.1	0.0877365	0.127467	0.160692	0.0937303		80
	84	*	TSRA110.1	19	14	15	22		84	*	TSRA110.1	8	6	6	9		84	*	TSRA110.1	0.79	0.827	0.835	0.815		84	*	TSRA110.1	0.728	0.779	0.786	0.779		84	*	TSRA110.1	0.679	0.739	0.747	0.742		84	*	TSRA110.1	0.155573	0.0979556	0.0964706	0.097958		84
	85	*	TSRA117.1	38	15	12	44		85	*	TSRA117.1	12	9	6	13		85	*	TSRA117.1	0.76	0.507	0.529	0.612		85	*	TSRA117.1	0.849	0.58	0.553	0.703		85	*	TSRA117.1	0.83	0.54	0.506	0.674		85	*	TSRA117.1	0.0471522	0.2544	0.265329	0.143113		85
	87	*	TSGR264.1	24	15	11	30		87	*	TSGR264.1	13	7	7	13		87	*	TSGR264.1	0.782	0.72	0.788	0.766		87	*	TSGR264.1	0.736	0.666	0.646	0.692		87	*	TSGR264.1	0.703	0.613	0.586	0.653		87	*	TSGR264.1	0.11891	0.198222	0.24346	0.16114		87
	89	*	TSGR271.1	6	4	4	6		89	*	TSGR271.1	3	3	3	3		89	*	TSGR271.1	0.337	0.12	0.118	0.203		89	*	TSGR271.1	0.371	0.184	0.134	0.247		89	*	TSGR271.1	0.338	0.172	0.129	0.231		89	*	TSGR271.1	0.440447	0.7152	0.764983	0.60714		89
	94	*	NSX70.1	4	2	3	4		94	*	NSX70.1	3	2	2	3		94	*	NSX70.1	0.287	0.173	0.212	0.23		94	*	NSX70.1	0.263	0.159	0.209	0.216		94	*	NSX70.1	0.23	0.146	0.186	0.193		94	*	NSX70.1	0.571219	0.713422	0.647889	0.632507		94
	97	*	NSX118.1	3	3	3	3		97	*	NSX118.1	2	2	2	2		97	*	NSX118.1	0.465	0.467	0.553	0.494		97	*	NSX118.1	0.416	0.5	0.485	0.498		97	*	NSX118.1	0.328	0.373	0.366	0.374		97	*	NSX118.1	0.445937	0.3632	0.423391	0.375112		97
	100	*	NSX161.1	3	3	3	3		100	*	NSX161.1	2	2	2	2		100	*	NSX161.1	0.158	0.44	0.6	0.383		100	*	NSX161.1	0.225	0.474	0.448	0.393		100	*	NSX161.1	0.199	0.36	0.346	0.315		100	*	NSX161.1	0.654936	0.3792	0.494256	0.444518		100
	105	*	SSR07A05.3	17	12	7	17		105	*	SSR07A05.3	6	5	4	6		105	*	SSR07A05.3	0.693	0.72	0.741	0.716		105	*	SSR07A05.3	0.746	0.722	0.69	0.726		105	*	SSR07A05.3	0.701	0.665	0.621	0.674		105	*	SSR07A05.3	0.109499	0.143467	0.186436	0.132896		105
	106	*	SSR07A07.2	26	10	8	29		106	*	SSR07A07.2	11	7	6	11		106	*	SSR07A07.2	0.614	0.267	0.282	0.406		106	*	SSR07A07.2	0.664	0.352	0.324	0.479		106	*	SSR07A07.2	0.643	0.337	0.31	0.464		106	*	SSR07A07.2	0.144005	0.494756	0.506436	0.324114		106
	107	*	SSR07A14.3	4	3	3	4		107	*	SSR07A14.3	3	2	2	3		107	*	SSR07A14.3	0.356	0.08	0.094	0.192		107	*	SSR07A14.3	0.382	0.213	0.152	0.269		107	*	SSR07A14.3	0.311	0.189	0.14	0.233		107	*	SSR07A14.3	0.454759	0.7184	0.768028	0.597217		107
	109	*	SSR07A19.3	7	6	6	9		109	*	SSR07A19.3	4	5	4	5		109	*	SSR07A19.3	0.525	0.653	0.687	0.614		109	*	SSR07A19.3	0.507	0.522	0.506	0.51		109	*	SSR07A19.3	0.412	0.421	0.393	0.41		109	*	SSR07A19.3	0.346535	0.408711	0.46519	0.391906		109
	110	*	SSR07A23.1	11	8	6	14		110	*	SSR07A23.1	7	5	4	8		110	*	SSR07A23.1	0.485	0.627	0.612	0.567		110	*	SSR07A23.1	0.567	0.559	0.527	0.558		110	*	SSR07A23.1	0.497	0.502	0.481	0.505		110	*	SSR07A23.1	0.247917	0.257244	0.265329	0.241497		110
	111	*	SSR07A24.3	11	5	5	11		111	*	SSR07A24.3	6	3	3	6		111	*	SSR07A24.3	0.594	0.493	0.635	0.579		111	*	SSR07A24.3	0.652	0.529	0.49	0.581		111	*	SSR07A24.3	0.586	0.464	0.413	0.519		111	*	SSR07A24.3	0.183217	0.368178	0.439446	0.276787		111
	112	*	SSR07A20.1	15	11	12	17		112	*	SSR07A20.1	6	5	5	6		112	*	SSR07A20.1	0.723	0.787	0.729	0.743		112	*	SSR07A20.1	0.739	0.725	0.68	0.731		112	*	SSR07A20.1	0.692	0.667	0.622	0.685		112	*	SSR07A20.1	0.116949	0.191111	0.181453	0.136331		112
	113	*	SSR07B01.3	10	11	8	11		113	*	SSR07B01.3	4	4	4	4		113	*	SSR07B01.3	0.782	0.622	0.729	0.719		113	*	SSR07B01.3	0.736	0.669	0.613	0.703		113	*	SSR07B01.3	0.682	0.615	0.561	0.65		113	*	SSR07B01.3	0.139496	0.180089	0.222422	0.147458		113
	115	*	SSR07B08.2	9	6	6	12		115	*	SSR07B08.2	5	4	3	5		115	*	SSR07B08.2	0.624	0.649	0.494	0.588		115	*	SSR07B08.2	0.615	0.527	0.502	0.568		115	*	SSR07B08.2	0.538	0.412	0.401	0.473		115	*	SSR07B08.2	0.230468	0.409067	0.361107	0.296839		115
	117	*	SSR07B14.1	11	12	8	14		117	*	SSR07B14.1	5	7	5	7		117	*	SSR07B14.1	0.634	0.6	0.553	0.598		117	*	SSR07B14.1	0.588	0.583	0.505	0.561		117	*	SSR07B14.1	0.54	0.526	0.421	0.504		117	*	SSR07B14.1	0.214391	0.244444	0.349204	0.256441		117
	118	*	SSR07B27.3	18	13	12	19		118	*	SSR07B27.3	8	8	5	8		118	*	SSR07B27.3	0.673	0.653	0.612	0.648		118	*	SSR07B27.3	0.7	0.605	0.581	0.654		118	*	SSR07B27.3	0.652	0.554	0.527	0.614		118	*	SSR07B27.3	0.128909	0.212444	0.246505	0.164369		118
	121	*	SSR08A02.1	2	2	1	2		121	*	SSR08A02.1	2	2	1	2		121	*	SSR08A02.1	0.059	0.027	0	0.031		121	*	SSR08A02.1	0.058	0.026	0	0.03		121	*	SSR08A02.1	0.056	0.026	0	0.03		121	*	SSR08A02.1	0.888246	0.948089	1	0.940576		121
	122	*	SSR08A06.2	7	6	6	7		122	*	SSR08A06.2	4	3	3	4		122	*	SSR08A06.2	0.634	0.56	0.494	0.567		122	*	SSR08A06.2	0.651	0.542	0.478	0.58		122	*	SSR08A06.2	0.578	0.459	0.414	0.512		122	*	SSR08A06.2	0.190668	0.334756	0.345329	0.253387		122
	124	*	SSR08A09.2	9	5	6	9		124	*	SSR08A09.2	5	3	4	5		124	*	SSR08A09.2	0.683	0.573	0.694	0.655		124	*	SSR08A09.2	0.612	0.544	0.55	0.575		124	*	SSR08A09.2	0.548	0.441	0.445	0.491		124	*	SSR08A09.2	0.236153	0.3216	0.399862	0.301243		124
	126	*	SSR08A15.1	8	5	4	8		126	*	SSR08A15.1	5	3	3	5		126	*	SSR08A15.1	0.525	0.253	0.388	0.402		126	*	SSR08A15.1	0.533	0.333	0.35	0.434		126	*	SSR08A15.1	0.456	0.306	0.32	0.39		126	*	SSR08A15.1	0.287913	0.512178	0.438893	0.363309		126
	127	*	SSR08A16.2	8	5	4	8		127	*	SSR08A16.2	5	3	3	5		127	*	SSR08A16.2	0.525	0.253	0.388	0.402		127	*	SSR08A16.2	0.533	0.333	0.35	0.434		127	*	SSR08A16.2	0.456	0.306	0.32	0.39		127	*	SSR08A16.2	0.287913	0.512178	0.438893	0.363309		127
	129	*	SSR08B06.2	9	3	3	9		129	*	SSR08B06.2	5	2	2	5		129	*	SSR08B06.2	0.614	0.493	0.553	0.559		129	*	SSR08B06.2	0.598	0.486	0.503	0.543		129	*	SSR08B06.2	0.515	0.366	0.375	0.437		129	*	SSR08B06.2	0.256151	0.389156	0.405675	0.328137		129
	131	*	SSR08B15.2	9	6	6	10		131	*	SSR08B15.2	5	3	3	5		131	*	SSR08B15.2	0.663	0.547	0.729	0.651		131	*	SSR08B15.2	0.657	0.637	0.658	0.655		131	*	SSR08B15.2	0.591	0.558	0.581	0.586		131	*	SSR08B15.2	0.183806	0.198222	0.224083	0.187211		131
	132	*	SSR08B20.1	30	15	13	33		132	*	SSR08B20.1	11	8	7	11		132	*	SSR08B20.1	0.861	0.773	0.718	0.789		132	*	SSR08B20.1	0.841	0.72	0.679	0.773		132	*	SSR08B20.1	0.818	0.671	0.617	0.74		132	*	SSR08B20.1	0.0575434	0.178311	0.19308	0.105327		132
	136	*	SSR08B27.2	14	10	9	19		136	*	SSR08B27.2	6	7	6	7		136	*	SSR08B27.2	0.574	0.48	0.435	0.502		136	*	SSR08B27.2	0.614	0.463	0.418	0.515		136	*	SSR08B27.2	0.581	0.436	0.386	0.49		136	*	SSR08B27.2	0.193412	0.314844	0.375502	0.27253		136
	137	*	SSR08B28.2	28	11	9	33		137	*	SSR08B28.2	13	6	6	14		137	*	SSR08B28.2	0.703	0.627	0.612	0.651		137	*	SSR08B28.2	0.737	0.567	0.552	0.636		137	*	SSR08B28.2	0.695	0.467	0.448	0.567		137	*	SSR08B28.2	0.121459	0.328711	0.354187	0.23448		137
	138	*	SSR08B29.2	19	12	12	19		138	*	SSR08B29.2	6	5	6	6		138	*	SSR08B29.2	0.693	0.6	0.694	0.667		138	*	SSR08B29.2	0.69	0.602	0.615	0.643		138	*	SSR08B29.2	0.656	0.561	0.564	0.607		138	*	SSR08B29.2	0.135967	0.2224	0.231834	0.175408		138
	140	*	SSR08B32.1	15	10	9	19		140	*	SSR08B32.1	6	7	6	7		140	*	SSR08B32.1	0.703	0.48	0.435	0.552		140	*	SSR08B32.1	0.668	0.463	0.418	0.541		140	*	SSR08B32.1	0.638	0.436	0.386	0.517		140	*	SSR08B32.1	0.137928	0.314844	0.375502	0.239559		140
	147	*	SSR08B60.1	10	3	4	10		147	*	SSR08B60.1	4	2	3	4		147	*	SSR08B60.1	0.545	0.173	0.141	0.307		147	*	SSR08B60.1	0.604	0.33	0.173	0.449		147	*	SSR08B60.1	0.519	0.274	0.159	0.383		147	*	SSR08B60.1	0.254387	0.543822	0.715156	0.382657		147
	148	*	SSR08B62.1	18	12	12	18		148	*	SSR08B62.1	6	6	6	6		148	*	SSR08B62.1	0.782	0.72	0.624	0.713		148	*	SSR08B62.1	0.768	0.646	0.629	0.704		148	*	SSR08B62.1	0.727	0.575	0.553	0.652		148	*	SSR08B62.1	0.100088	0.227022	0.20692	0.151275		148
	150	*	SSR08B66.1	8	7	6	9		150	*	SSR08B66.1	5	4	3	6		150	*	SSR08B66.1	0.535	0.72	0.659	0.628		150	*	SSR08B66.1	0.466	0.65	0.652	0.603		150	*	SSR08B66.1	0.421	0.573	0.573	0.535		150	*	SSR08B66.1	0.326733	0.2128	0.200277	0.226377		150
	151	*	SSR08B68.1	3	2	2	3		151	*	SSR08B68.1	3	2	2	3		151	*	SSR08B68.1	0.218	0.48	0.494	0.383		151	*	SSR08B68.1	0.2	0.367	0.374	0.315		151	*	SSR08B68.1	0.189	0.298	0.303	0.273		151	*	SSR08B68.1	0.638663	0.5008	0.500069	0.508199		151
	152	*	SSR08B75.1	16	9	8	16		152	*	SSR08B75.1	9	6	6	9		152	*	SSR08B75.1	0.653	0.533	0.565	0.59		152	*	SSR08B75.1	0.716	0.644	0.518	0.67		152	*	SSR08B75.1	0.668	0.594	0.47	0.62		152	*	SSR08B75.1	0.131066	0.186133	0.289689	0.155738		152
	153	*	SSR08B78.1	7	6	6	8		153	*	SSR08B78.1	4	3	3	4		153	*	SSR08B78.1	0.535	0.733	0.753	0.663		153	*	SSR08B78.1	0.541	0.662	0.666	0.639		153	*	SSR08B78.1	0.488	0.584	0.588	0.569		153	*	SSR08B78.1	0.270464	0.214578	0.22519	0.205854		153
	155	*	SSR08B84.2	7	3	3	7		155	*	SSR08B84.2	4	2	2	4		155	*	SSR08B84.2	0.327	0.427	0.435	0.391		155	*	SSR08B84.2	0.36	0.493	0.475	0.507		155	*	SSR08B84.2	0.312	0.37	0.361	0.389		155	*	SSR08B84.2	0.46417	0.357156	0.376609	0.326375		155
	156	*	SSR08B85.2	19	14	13	23		156	*	SSR08B85.2	7	6	6	8		156	*	SSR08B85.2	0.782	0.907	0.753	0.808		156	*	SSR08B85.2	0.746	0.765	0.721	0.747		156	*	SSR08B85.2	0.706	0.721	0.669	0.705		156	*	SSR08B85.2	0.121263	0.123911	0.139377	0.117688		156
	157	*	SSR08B88.2	23	10	10	28		157	*	SSR08B88.2	10	7	6	11		157	*	SSR08B88.2	0.703	0.48	0.44	0.554		157	*	SSR08B88.2	0.681	0.463	0.422	0.545		157	*	SSR08B88.2	0.658	0.436	0.39	0.524		157	*	SSR08B88.2	0.122635	0.314844	0.362768	0.231749		157
	158	*	SSR08B90.2	4	4	3	5		158	*	SSR08B90.2	3	3	2	3		158	*	SSR08B90.2	0.406	0.467	0.353	0.406		158	*	SSR08B90.2	0.445	0.415	0.386	0.417		158	*	SSR08B90.2	0.349	0.333	0.31	0.333		158	*	SSR08B90.2	0.396922	0.438933	0.450242	0.422351		158
	159	*	SSR08B92.2	20	13	14	22		159	*	SSR08B92.2	8	5	6	8		159	*	SSR08B92.2	0.683	0.76	0.718	0.716		159	*	SSR08B92.2	0.768	0.728	0.716	0.742		159	*	SSR08B92.2	0.733	0.685	0.677	0.708		159	*	SSR08B92.2	0.0896971	0.137778	0.128304	0.103301		159
	160	*	SSR08B95.1	13	6	7	13		160	*	SSR08B95.1	5	3	4	5		160	*	SSR08B95.1	0.634	0.667	0.635	0.644		160	*	SSR08B95.1	0.693	0.664	0.67	0.677		160	*	SSR08B95.1	0.631	0.585	0.593	0.609		160	*	SSR08B95.1	0.147338	0.192178	0.180346	0.166542		160
	161	*	SSR11A06.1	5	3	3	5		161	*	SSR11A06.1	3	2	2	3		161	*	SSR11A06.1	0.307	0.387	0.624	0.433		161	*	SSR11A06.1	0.319	0.4	0.489	0.419		161	*	SSR11A06.1	0.286	0.318	0.368	0.342		161	*	SSR11A06.1	0.522008	0.440356	0.473218	0.421882		161
	163	*	SSR11A27.1	7	4	5	7		163	*	SSR11A27.1	4	4	4	4		163	*	SSR11A27.1	0.485	0.32	0.435	0.421		163	*	SSR11A27.1	0.478	0.287	0.372	0.394		163	*	SSR11A27.1	0.421	0.258	0.327	0.35		163	*	SSR11A27.1	0.333007	0.535289	0.43391	0.412281		163
	165	*	TSGR904.1	3	3	4	4		165	*	TSGR904.1	2	2	2	2		165	*	TSGR904.1	0.436	0.547	0.5	0.488		165	*	TSGR904.1	0.449	0.498	0.498	0.483		165	*	TSGR904.1	0.347	0.372	0.373	0.366		165	*	TSGR904.1	0.402412	0.407289	0.370796	0.384243		165
	166	*	TSGR905.1	6	4	4	7		166	*	TSGR905.1	3	3	3	4		166	*	TSGR905.1	0.475	0.453	0.506	0.479		166	*	TSGR905.1	0.516	0.515	0.508	0.516		166	*	TSGR905.1	0.416	0.394	0.383	0.402		166	*	TSGR905.1	0.331046	0.332978	0.366644	0.337091		166
	168	*	TSR8EM15.2	3	4	2	4		168	*	TSR8EM15.2	2	2	2	2		168	*	TSR8EM15.2	0.396	0.324	0.329	0.354		168	*	TSR8EM15.2	0.384	0.309	0.277	0.33		168	*	TSR8EM15.2	0.309	0.26	0.237	0.275		168	*	TSR8EM15.2	0.456916	0.512889	0.558201	0.501006		168
	169	*	TSR8EM24.2	6	4	4	7		169	*	TSR8EM24.2	4	3	3	5		169	*	TSR8EM24.2	0.545	0.587	0.671	0.598		169	*	TSR8EM24.2	0.525	0.495	0.504	0.51		169	*	TSR8EM24.2	0.414	0.389	0.381	0.398		169	*	TSR8EM24.2	0.345162	0.417956	0.492872	0.404266		169
	172	*	TSRB09.2	9	6	6	9		172	*	TSRB09.2	4	3	4	4		172	*	TSRB09.2	0.733	0.6	0.624	0.659		172	*	TSRB09.2	0.703	0.551	0.537	0.619		172	*	TSRB09.2	0.644	0.445	0.434	0.544		172	*	TSRB09.2	0.149495	0.350756	0.368858	0.245137		172
	173	*	TSRB11.2	6	6	6	6		173	*	TSRB11.2	3	3	3	3		173	*	TSRB11.2	0.644	0.56	0.447	0.556		173	*	TSRB11.2	0.595	0.545	0.498	0.581		173	*	TSRB11.2	0.516	0.454	0.426	0.493		173	*	TSRB11.2	0.255563	0.311644	0.319862	0.256		173
	174	*	TSRB29.2	7	6	6	10		174	*	TSRB29.2	5	4	4	6		174	*	TSRB29.2	0.495	0.4	0.447	0.452		174	*	TSRB29.2	0.564	0.514	0.442	0.562		174	*	TSRB29.2	0.47	0.462	0.4	0.49		174	*	TSRB29.2	0.26517	0.307022	0.358616	0.24916		174
	175	*	TSRB38.2	11	9	5	14		175	*	TSRB38.2	6	5	3	7		175	*	TSRB38.2	0.66	0.63	0.624	0.64		175	*	TSRB38.2	0.618	0.587	0.522	0.581		175	*	TSRB38.2	0.555	0.506	0.442	0.511		175	*	TSRB38.2	0.204588	0.273956	0.345606	0.25512		175
	176	*	TSRB39.2	19	12	10	23		176	*	TSRB39.2	9	6	5	9		176	*	TSRB39.2	0.772	0.693	0.765	0.747		176	*	TSRB39.2	0.699	0.659	0.674	0.685		176	*	TSRB39.2	0.671	0.617	0.619	0.651		176	*	TSRB39.2	0.125772	0.174756	0.212734	0.147811		176
	177	*	TSRF101.1	11	6	6	11		177	*	TSRF101.1	5	3	3	5		177	*	TSRF101.1	0.634	0.413	0.529	0.536		177	*	TSRF101.1	0.634	0.478	0.526	0.559		177	*	TSRF101.1	0.582	0.422	0.452	0.503		177	*	TSRF101.1	0.194001	0.3632	0.310173	0.266217		177
	178	*	TSRF105.1	10	8	5	13		178	*	TSRF105.1	6	5	3	7		178	*	TSRF105.1	0.653	0.64	0.624	0.64		178	*	TSRF105.1	0.615	0.586	0.522	0.579		178	*	TSRF105.1	0.552	0.503	0.442	0.51		178	*	TSRF105.1	0.209097	0.294578	0.345606	0.26334		178
	179	*	TSRF116.1	3	3	3	3		179	*	TSRF116.1	2	2	2	2		179	*	TSRF116.1	0.465	0.573	0.553	0.525		179	*	TSRF116.1	0.493	0.46	0.469	0.476		179	*	TSRF116.1	0.37	0.353	0.358	0.362		179	*	TSRF116.1	0.369081	0.462756	0.43917	0.413074		179
	181	*	TSRF124.1	6	6	4	9		181	*	TSRF124.1	3	3	3	4		181	*	TSRF124.1	0.545	0.527	0.529	0.535		181	*	TSRF124.1	0.57	0.459	0.456	0.505		181	*	TSRF124.1	0.486	0.364	0.356	0.416		181	*	TSRF124.1	0.261053	0.408356	0.43308	0.344314		181
	182	*	TSRF136.1	12	9	5	15		182	*	TSRF136.1	6	4	4	6		182	*	TSRF136.1	0.634	0.5	0.459	0.538		182	*	TSRF136.1	0.639	0.53	0.396	0.541		182	*	TSRF136.1	0.589	0.469	0.359	0.495		182	*	TSRF136.1	0.182041	0.303822	0.387405	0.264896		182
	183	*	TSRF138.1	3	5	3	5		183	*	TSRF138.1	2	3	2	3		183	*	TSRF138.1	0.307	0.253	0.224	0.264		183	*	TSRF138.1	0.369	0.321	0.269	0.324		183	*	TSRF138.1	0.3	0.279	0.232	0.275		183	*	TSRF138.1	0.466915	0.529956	0.584221	0.517829		183
	184	*	TSRF144.1	24	13	11	27		184	*	TSRF144.1	8	8	8	9		184	*	TSRF144.1	0.881	0.68	0.694	0.762		184	*	TSRF144.1	0.8	0.603	0.585	0.691		184	*	TSRF144.1	0.769	0.558	0.53	0.653		184	*	TSRF144.1	0.0883247	0.211733	0.253426	0.152831		184
	185	*	TSRF157.1	4	5	4	5		185	*	TSRF157.1	3	3	3	3		185	*	TSRF157.1	0.446	0.56	0.576	0.521		185	*	TSRF157.1	0.418	0.495	0.491	0.468		185	*	TSRF157.1	0.344	0.389	0.385	0.374		185	*	TSRF157.1	0.414959	0.393778	0.417301	0.399069		185
	186	*	TSRF160.1	3	1	1	3		186	*	TSRF160.1	2	1	1	2		186	*	TSRF160.1	0.129	0	0	0.05		186	*	TSRF160.1	0.138	0	0	0.056		186	*	TSRF160.1	0.128	0	0	0.054		186	*	TSRF160.1	0.758651	1	1	0.898093		186
	187	*	TSRF161.1	5	6	7	7		187	*	TSRF161.1	3	3	3	3		187	*	TSRF161.1	0.495	0.667	0.702	0.612		187	*	TSRF161.1	0.544	0.617	0.592	0.654		187	*	TSRF161.1	0.473	0.539	0.508	0.579		187	*	TSRF161.1	0.270856	0.256889	0.300208	0.202331		187
	188	*	TSRF162.1	7	3	3	7		188	*	TSRF162.1	5	2	2	5		188	*	TSRF162.1	0.475	0.373	0.376	0.414		188	*	TSRF162.1	0.514	0.367	0.349	0.426		188	*	TSRF162.1	0.424	0.298	0.287	0.35		188	*	TSRF162.1	0.319871	0.470933	0.488997	0.406497		188
	189	*	TSRF164.1	7	5	3	8		189	*	TSRF164.1	4	4	2	5		189	*	TSRF164.1	0.436	0.12	0.141	0.249		189	*	TSRF164.1	0.478	0.249	0.19	0.334		189	*	TSRF164.1	0.411	0.227	0.171	0.296		189	*	TSRF164.1	0.333007	0.692444	0.699377	0.514364		189
	190	*	TSRF167.1	3	2	2	4		190	*	TSRF167.1	2	2	2	3		190	*	TSRF167.1	0.05	0.027	0.012	0.031		190	*	TSRF167.1	0.067	0.026	0.012	0.038		190	*	TSRF167.1	0.065	0.026	0.012	0.037		190	*	TSRF167.1	0.887266	0.948089	0.976747	0.932737		190
	191	*	TSRF169.1	10	5	6	10		191	*	TSRF169.1	5	4	4	5		191	*	TSRF169.1	0.564	0.32	0.306	0.41		191	*	TSRF169.1	0.559	0.318	0.312	0.424		191	*	TSRF169.1	0.495	0.286	0.282	0.379		191	*	TSRF169.1	0.263994	0.505778	0.518616	0.384331		191
	193	*	TSRF184.1	4	4	3	5		193	*	TSRF184.1	3	2	2	3		193	*	TSRF184.1	0.455	0.446	0.529	0.477		193	*	TSRF184.1	0.429	0.415	0.475	0.444		193	*	TSRF184.1	0.361	0.327	0.361	0.356		193	*	TSRF184.1	0.392805	0.428622	0.418685	0.402299		193
	194	*	TSRF187.1	3	3	3	3		194	*	TSRF187.1	2	2	2	2		194	*	TSRF187.1	0.465	0.08	0.165	0.257		194	*	TSRF187.1	0.501	0.271	0.19	0.388		194	*	TSRF187.1	0.374	0.233	0.171	0.312		194	*	TSRF187.1	0.361239	0.6608	0.686644	0.454999		194
	196	*	TSRF192.1	15	6	8	16		196	*	TSRF192.1	9	5	5	9		196	*	TSRF192.1	0.426	0.32	0.318	0.36		196	*	TSRF192.1	0.496	0.299	0.339	0.393		196	*	TSRF192.1	0.469	0.284	0.318	0.375		196	*	TSRF192.1	0.321831	0.492267	0.487612	0.412721		196
	197	*	TSRF194.1	8	6	5	10		197	*	TSRF194.1	5	4	4	6		197	*	TSRF194.1	0.356	0.133	0.129	0.218		197	*	TSRF194.1	0.391	0.174	0.154	0.259		197	*	TSRF194.1	0.354	0.165	0.144	0.241		197	*	TSRF194.1	0.409078	0.735822	0.749204	0.59155		197
	198	*	TSRF195.1	7	3	3	7		198	*	TSRF195.1	4	2	2	4		198	*	TSRF195.1	0.58	0.587	0.624	0.596		198	*	TSRF195.1	0.551	0.477	0.496	0.513		198	*	TSRF195.1	0.447	0.362	0.372	0.401		198	*	TSRF195.1	0.310068	0.455289	0.466574	0.394108		198
	199	*	TSRF198.1	2	3	2	3		199	*	TSRF198.1	2	3	2	3		199	*	TSRF198.1	0.04	0.187	0.2	0.134		199	*	TSRF198.1	0.039	0.172	0.181	0.126		199	*	TSRF198.1	0.038	0.158	0.164	0.118		199	*	TSRF198.1	0.923929	0.691733	0.68	0.766768		199
	200	*	TSRF204.1	7	4	4	7		200	*	TSRF204.1	4	3	3	4		200	*	TSRF204.1	0.634	0.507	0.459	0.54		200	*	TSRF204.1	0.58	0.507	0.444	0.526		200	*	TSRF204.1	0.486	0.395	0.349	0.424		200	*	TSRF204.1	0.29105	0.361067	0.40872	0.333128		200
	201	*	TSRF208.1	6	5	4	8		201	*	TSRF208.1	4	4	3	5		201	*	TSRF208.1	0.475	0.453	0.424	0.452		201	*	TSRF208.1	0.463	0.389	0.383	0.417		201	*	TSRF208.1	0.382	0.334	0.313	0.348		201	*	TSRF208.1	0.37163	0.449956	0.463806	0.420003		201
	202	*	TSRF211.1	6	5	3	8		202	*	TSRF211.1	4	3	2	4		202	*	TSRF211.1	0.436	0.514	0.506	0.481		202	*	TSRF211.1	0.478	0.485	0.448	0.469		202	*	TSRF211.1	0.387	0.383	0.346	0.374		202	*	TSRF211.1	0.349672	0.377778	0.432249	0.379868		202
	203	*	TSRF215.1	8	3	3	8		203	*	TSRF215.1	4	2	2	4		203	*	TSRF215.1	0.554	0.707	0.694	0.644		203	*	TSRF215.1	0.556	0.503	0.503	0.525		203	*	TSRF215.1	0.465	0.375	0.375	0.414		203	*	TSRF215.1	0.289285	0.542756	0.528858	0.415188		203
	204	*	TSRF218.1	5	3	3	5		204	*	TSRF218.1	3	2	2	3		204	*	TSRF218.1	0.436	0.373	0.459	0.425		204	*	TSRF218.1	0.434	0.367	0.422	0.411		204	*	TSRF218.1	0.364	0.298	0.332	0.336		204	*	TSRF218.1	0.387707	0.470933	0.436955	0.423232		204
	206	*	TSRF225.1	3	4	5	5		206	*	TSRF225.1	2	3	3	3		206	*	TSRF225.1	0.426	0.453	0.482	0.452		206	*	TSRF225.1	0.431	0.455	0.443	0.441		206	*	TSRF225.1	0.337	0.366	0.353	0.351		206	*	TSRF225.1	0.41692	0.396622	0.41564	0.409727		206
	207	*	TSRF229.1	10	5	6	10		207	*	TSRF229.1	5	4	4	5		207	*	TSRF229.1	0.564	0.32	0.306	0.41		207	*	TSRF229.1	0.559	0.318	0.312	0.424		207	*	TSRF229.1	0.495	0.286	0.282	0.379		207	*	TSRF229.1	0.263994	0.505778	0.518616	0.384331		207
	208	*	TSRF230.1	7	5	3	8		208	*	TSRF230.1	4	3	2	4		208	*	TSRF230.1	0.604	0.554	0.659	0.608		208	*	TSRF230.1	0.566	0.516	0.497	0.536		208	*	TSRF230.1	0.478	0.394	0.372	0.427		208	*	TSRF230.1	0.286344	0.368178	0.497855	0.361753		208
	210	*	TSRF237.1	7	5	4	7		210	*	TSRF237.1	3	3	3	3		210	*	TSRF237.1	0.48	0.123	0.059	0.24		210	*	TSRF237.1	0.525	0.188	0.101	0.32		210	*	TSRF237.1	0.461	0.174	0.097	0.292		210	*	TSRF237.1	0.292814	0.673244	0.844983	0.513454		210
	212	*	TSRN214.1	15	7	5	16		212	*	TSRN214.1	8	6	5	8		212	*	TSRN214.1	0.455	0.467	0.376	0.433		212	*	TSRN214.1	0.517	0.399	0.321	0.423		212	*	TSRN214.1	0.49	0.356	0.289	0.394		212	*	TSRN214.1	0.27164	0.3952	0.477924	0.357203		212
	213	*	TSRP06.2	9	5	4	10		213	*	TSRP06.2	5	3	3	5		213	*	TSRP06.2	0.574	0.4	0.412	0.471		213	*	TSRP06.2	0.539	0.461	0.358	0.464		213	*	TSRP06.2	0.46	0.364	0.297	0.387		213	*	TSRP06.2	0.309872	0.375289	0.479585	0.37015		213
	214	*	TSRP07.2	3	5	3	5		214	*	TSRP07.2	2	3	2	3		214	*	TSRP07.2	0.426	0.493	0.588	0.498		214	*	TSRP07.2	0.439	0.492	0.502	0.482		214	*	TSRP07.2	0.341	0.387	0.375	0.371		214	*	TSRP07.2	0.409666	0.363556	0.431419	0.38665		214
	215	*	CiBE0246.1	9	6	4	10		215	*	CiBE0246.1	4	4	3	5		215	*	CiBE0246.1	0.495	0.48	0.471	0.483		215	*	CiBE0246.1	0.538	0.459	0.421	0.479		215	*	CiBE0246.1	0.471	0.374	0.336	0.405		215	*	CiBE0246.1	0.281835	0.393067	0.435571	0.35688		215
	216	*	CiBE0447.1	26	10	10	27		216	*	CiBE0447.1	9	5	6	9		216	*	CiBE0447.1	0.861	0.72	0.565	0.724		216	*	CiBE0447.1	0.831	0.672	0.609	0.741		216	*	CiBE0447.1	0.804	0.611	0.554	0.703		216	*	CiBE0447.1	0.0749926	0.188978	0.216332	0.124705		216
	217	*	CiBE1644.1	23	12	9	28		217	*	CiBE1644.1	9	7	5	10		217	*	CiBE1644.1	0.693	0.587	0.512	0.604		217	*	CiBE1644.1	0.755	0.542	0.452	0.627		217	*	CiBE1644.1	0.718	0.502	0.416	0.593		217	*	CiBE1644.1	0.119498	0.250844	0.317924	0.183717		217
	218	*	CiBE2165.1	22	15	12	26		218	*	CiBE2165.1	10	6	6	11		218	*	CiBE2165.1	0.723	0.72	0.788	0.743		218	*	CiBE2165.1	0.767	0.718	0.706	0.756		218	*	CiBE2165.1	0.729	0.669	0.65	0.713		218	*	CiBE2165.1	0.0981276	0.128889	0.166782	0.105415		218
	219	*	CiBE2227.1	17	7	6	18		219	*	CiBE2227.1	8	5	4	9		219	*	CiBE2227.1	0.832	0.6	0.588	0.686		219	*	CiBE2227.1	0.724	0.512	0.495	0.601		219	*	CiBE2227.1	0.68	0.404	0.392	0.53		219	*	CiBE2227.1	0.193805	0.396978	0.408997	0.304091		219
	220	*	CiBE4265.1	16	6	7	16		220	*	CiBE4265.1	9	4	5	9		220	*	CiBE4265.1	0.584	0.16	0.118	0.31		220	*	CiBE4265.1	0.578	0.221	0.146	0.359		220	*	CiBE4265.1	0.542	0.209	0.141	0.341		220	*	CiBE4265.1	0.214979	0.6704	0.761661	0.457788		220
	221	*	CX0004.2	10	7	6	12		221	*	CX0004.2	5	4	4	6		221	*	CX0004.2	0.545	0.387	0.459	0.471		221	*	CX0004.2	0.511	0.433	0.421	0.46		221	*	CX0004.2	0.468	0.387	0.365	0.416		221	*	CX0004.2	0.279286	0.3856	0.397924	0.33759		221
	223	*	CX0035.2	3	4	4	5		223	*	CX0035.2	2	3	2	3		223	*	CX0035.2	0.455	0.693	0.602	0.571		223	*	CX0035.2	0.5	0.52	0.499	0.504		223	*	CX0035.2	0.374	0.402	0.373	0.382		223	*	CX0035.2	0.358102	0.479822	0.425329	0.402504		223
	224	*	CX2004.2	32	19	14	39		224	*	CX2004.2	11	9	8	12		224	*	CX2004.2	0.822	0.773	0.694	0.766		224	*	CX2004.2	0.821	0.764	0.662	0.769		224	*	CX2004.2	0.796	0.727	0.61	0.741		224	*	CX2004.2	0.0583276	0.0997333	0.17564	0.0869482		224
	227	*	CX2040.2	49	15	15	52		227	*	CX2040.2	14	7	8	14		227	*	CX2040.2	0.911	0.76	0.612	0.77		227	*	CX2040.2	0.889	0.686	0.6	0.768		227	*	CX2040.2	0.874	0.644	0.551	0.744		227	*	CX2040.2	0.036369	0.1776	0.228789	0.101863		227
	228	*	CX3001.1	16	10	10	16		228	*	CX3001.1	8	5	4	8		228	*	CX3001.1	0.812	0.76	0.741	0.774		228	*	CX3001.1	0.758	0.715	0.698	0.731		228	*	CX3001.1	0.716	0.662	0.64	0.686		228	*	CX3001.1	0.114793	0.174044	0.176194	0.130048		228
	230	*	CX4005.3	7	3	3	7		230	*	CX4005.3	4	2	2	4		230	*	CX4005.3	0.406	0.413	0.588	0.467		230	*	CX4005.3	0.421	0.387	0.436	0.419		230	*	CX4005.3	0.377	0.311	0.34	0.354		230	*	CX4005.3	0.383394	0.458133	0.497301	0.415041		230
	234	*	CX5039.3	11	6	5	11		234	*	CX5039.3	6	3	3	6		234	*	CX5039.3	0.683	0.56	0.565	0.609		234	*	CX5039.3	0.662	0.532	0.492	0.585		234	*	CX5039.3	0.591	0.465	0.433	0.517		234	*	CX5039.3	0.200078	0.289956	0.321799	0.2464		234
	235	*	CX6024.3	5	3	3	5		235	*	CX6024.3	3	2	2	3		235	*	CX6024.3	0.614	0.533	0.482	0.548		235	*	CX6024.3	0.516	0.499	0.422	0.488		235	*	CX6024.3	0.405	0.373	0.332	0.377		235	*	CX6024.3	0.403	0.397689	0.446644	0.403415		235
	236	*	CX6035.3	6	4	3	7		236	*	CX6035.3	4	3	2	4		236	*	CX6035.3	0.436	0.507	0.506	0.479		236	*	CX6035.3	0.478	0.482	0.448	0.468		236	*	CX6035.3	0.387	0.381	0.346	0.373		236	*	CX6035.3	0.349672	0.388089	0.432249	0.383039		236
	237	*	CX6037.3	10	6	7	10		237	*	CX6037.3	5	4	4	5		237	*	CX6037.3	0.594	0.293	0.435	0.456		237	*	CX6037.3	0.618	0.482	0.505	0.548		237	*	CX6037.3	0.547	0.387	0.44	0.474		237	*	CX6037.3	0.21145	0.355378	0.322907	0.26933		237
	238	*	CX6F21.3	7	4	3	7		238	*	CX6F21.3	4	3	2	4		238	*	CX6F21.3	0.693	0.493	0.459	0.559		238	*	CX6F21.3	0.571	0.427	0.463	0.507		238	*	CX6F21.3	0.473	0.34	0.354	0.406		238	*	CX6F21.3	0.351436	0.438933	0.396817	0.370209		238
	240	*	F02.2	10	5	6	11		240	*	F02.2	7	4	4	7		240	*	F02.2	0.465	0.307	0.388	0.395		240	*	F02.2	0.456	0.34	0.345	0.393		240	*	F02.2	0.429	0.296	0.298	0.366		240	*	F02.2	0.328497	0.4784	0.47737	0.396045		240
	244	*	F40.2	14	10	8	15		244	*	F40.2	6	6	5	6		244	*	F40.2	0.653	0.453	0.471	0.536		244	*	F40.2	0.71	0.543	0.521	0.614		244	*	F40.2	0.659	0.475	0.45	0.557		244	*	F40.2	0.128713	0.280356	0.315433	0.206353		244
	245	*	F50.2	4	5	6	6		245	*	F50.2	3	3	3	3		245	*	F50.2	0.406	0.48	0.424	0.433		245	*	F50.2	0.512	0.528	0.498	0.52		245	*	F50.2	0.389	0.436	0.418	0.42		245	*	F50.2	0.326144	0.296356	0.327059	0.306734		245
	246	*	F79.2	7	3	3	7		246	*	F79.2	5	3	3	5		246	*	F79.2	0.178	0.04	0.024	0.088		246	*	F79.2	0.186	0.04	0.023	0.093		246	*	F79.2	0.18	0.039	0.023	0.092		246	*	F79.2	0.682776	0.922489	0.953772	0.833209		246
	2	**	CTVR04.1	24	14	14	28		2	**	CTVR04.1	9	7	6	9		2	**	CTVR04.1	0.871	0.84	0.788	0.835		2	**	CTVR04.1	0.792	0.74	0.723	0.758		2	**	CTVR04.1	0.76	0.689	0.67	0.718		2	**	CTVR04.1	0.0896971	0.149511	0.156817	0.116895		2
	6	**	CUBER602.1	11	7	9	11		6	**	CUBER602.1	5	5	5	5		6	**	CUBER602.1	0.743	0.307	0.353	0.49		6	**	CUBER602.1	0.695	0.338	0.357	0.529		6	**	CUBER602.1	0.64	0.317	0.337	0.492		6	**	CUBER602.1	0.15322	0.489067	0.438339	0.275084		6
	11	**	CUBER935.1	10	6	6	10		11	**	CUBER935.1	4	4	4	4		11	**	CUBER935.1	0.683	0.48	0.482	0.559		11	**	CUBER935.1	0.647	0.521	0.46	0.566		11	**	CUBER935.1	0.577	0.442	0.412	0.5		11	**	CUBER935.1	0.208117	0.297778	0.341176	0.2528		11
	88	**	TSGR265.1	22	17	14	23		88	**	TSGR265.1	7	6	6	7		88	**	TSGR265.1	0.851	0.84	0.859	0.851		88	**	TSGR265.1	0.814	0.789	0.723	0.789		88	**	TSGR265.1	0.784	0.75	0.673	0.756		88	**	TSGR265.1	0.0669542	0.102222	0.174256	0.0922329		88
	133	**	SSR08B21.2	17	13	9	19		133	**	SSR08B21.2	6	7	6	7		133	**	SSR08B21.2	0.752	0.64	0.647	0.686		133	**	SSR08B21.2	0.731	0.582	0.551	0.643		133	**	SSR08B21.2	0.688	0.538	0.494	0.6		133	**	SSR08B21.2	0.121263	0.233422	0.277232	0.181045		133
	135	**	SSR08B25.2	30	15	13	33		135	**	SSR08B25.2	11	8	7	11		135	**	SSR08B25.2	0.861	0.773	0.718	0.789		135	**	SSR08B25.2	0.841	0.72	0.679	0.773		135	**	SSR08B25.2	0.818	0.671	0.617	0.74		135	**	SSR08B25.2	0.0575434	0.178311	0.19308	0.105327		135
	141	**	SSR08B35.1	24	12	10	26		141	**	SSR08B35.1	8	7	7	8		141	**	SSR08B35.1	0.881	0.653	0.682	0.751		141	**	SSR08B35.1	0.8	0.587	0.578	0.685		141	**	SSR08B35.1	0.769	0.541	0.522	0.647		141	**	SSR08B35.1	0.0883247	0.227378	0.260069	0.157675		141
	143	**	SSR08B40.2	28	11	9	33		143	**	SSR08B40.2	13	6	6	14		143	**	SSR08B40.2	0.703	0.627	0.612	0.651		143	**	SSR08B40.2	0.737	0.567	0.552	0.636		143	**	SSR08B40.2	0.695	0.467	0.448	0.567		143	**	SSR08B40.2	0.121459	0.328711	0.354187	0.23448		143
	146	**	SSR08B54.2	26	11	9	30		146	**	SSR08B54.2	12	6	6	13		146	**	SSR08B54.2	0.67	0.627	0.612	0.638		146	**	SSR08B54.2	0.728	0.567	0.552	0.631		146	**	SSR08B54.2	0.683	0.467	0.448	0.56		146	**	SSR08B54.2	0.125184	0.328711	0.354187	0.235918		146
	164	**	TSGR901.1	9	8	7	11		164	**	TSGR901.1	5	5	4	6		164	**	TSGR901.1	0.564	0.667	0.718	0.644		164	**	TSGR901.1	0.581	0.595	0.553	0.575		164	**	TSGR901.1	0.495	0.518	0.469	0.495		164	**	TSGR901.1	0.259092	0.259022	0.372457	0.287033		164
	195	**	TSRF191.1	8	3	3	8		195	**	TSRF191.1	4	2	2	4		195	**	TSRF191.1	0.554	0.707	0.694	0.644		195	**	TSRF191.1	0.556	0.503	0.503	0.525		195	**	TSRF191.1	0.465	0.375	0.375	0.414		195	**	TSRF191.1	0.289285	0.542756	0.528858	0.415188		195
	205	**	TSRF206.1	5	6	6	6		205	**	TSRF206.1	3	3	3	3		205	**	TSRF206.1	0.495	0.667	0.706	0.613		205	**	TSRF206.1	0.544	0.617	0.592	0.654		205	**	TSRF206.1	0.473	0.539	0.507	0.579		205	**	TSRF206.1	0.270856	0.256889	0.31128	0.204621		205
	209	**	TSRF234.1	7	4	4	8		209	**	TSRF234.1	4	3	2	4		209	**	TSRF234.1	0.604	0.547	0.667	0.608		209	**	TSRF234.1	0.566	0.516	0.496	0.536		209	**	TSRF234.1	0.478	0.394	0.371	0.427		209	**	TSRF234.1	0.286344	0.374222	0.495363	0.361665		209
	233	**	CX5022.3	7	5	3	9		233	**	CX5022.3	4	3	2	5		233	**	CX5022.3	0.465	0.387	0.376	0.414		233	**	CX5022.3	0.533	0.387	0.349	0.441		233	**	CX5022.3	0.445	0.32	0.287	0.366		233	**	CX5022.3	0.291246	0.4464	0.488997	0.3853		233
	241	**	F03.2	18	12	12	18		241	**	F03.2	6	6	6	6		241	**	F03.2	0.782	0.72	0.624	0.713		241	**	F03.2	0.768	0.646	0.629	0.704		241	**	F03.2	0.727	0.575	0.553	0.652		241	**	F03.2	0.100088	0.227022	0.20692	0.151275		241
	242	**	F16.3	10	6	7	10		242	**	F16.3	4	4	4	4		242	**	F16.3	0.6	0.293	0.435	0.458		242	**	F16.3	0.619	0.482	0.505	0.549		242	**	F16.3	0.546	0.387	0.44	0.474		242	**	F16.3	0.210274	0.355378	0.322907	0.267392		242
	3		CUBER403.1	25	9	6	26		3		CUBER403.1	9	5	5	9		3		CUBER403.1	0.438	0.375	0.247	0.356		3		CUBER403.1	0.652	0.42	0.257	0.475		3		CUBER403.1	0.619	0.393	0.244	0.453		3		CUBER403.1	0.175963	0.357867	0.571488	0.328254		3
	5		CUBER601.1	13	7	8	17		5		CUBER601.1	8	5	6	9		5		CUBER601.1	0.653	0.64	0.729	0.674		5		CUBER601.1	0.644	0.574	0.593	0.629		5		CUBER601.1	0.588	0.491	0.509	0.555		5		CUBER601.1	0.221841	0.303111	0.361384	0.261902		5
	7		CUBER903.1	15	6	6	16		7		CUBER903.1	9	5	4	9		7		CUBER903.1	0.673	0.507	0.529	0.579		7		CUBER903.1	0.639	0.486	0.479	0.546		7		CUBER903.1	0.585	0.384	0.392	0.474		7		CUBER903.1	0.180669	0.3792	0.377163	0.287063		7
	10		CUBER925.1	3	5	3	5		10		CUBER925.1	2	3	2	3		10		CUBER925.1	0.376	0.122	0.153	0.231		10		CUBER925.1	0.394	0.185	0.162	0.272		10		CUBER925.1	0.315	0.169	0.148	0.236		10		CUBER925.1	0.444368	0.696711	0.721246	0.572085		10
	15		GRW2051.1	22	14	13	22		15		GRW2051.1	8	6	6	8		15		GRW2051.1	0.812	0.773	0.812	0.801		15		GRW2051.1	0.796	0.725	0.709	0.757		15		GRW2051.1	0.766	0.674	0.656	0.72		15		GRW2051.1	0.0816587	0.148089	0.188651	0.109467		15
	16		GRW3021.1	4	4	3	4		16		GRW3021.1	2	2	2	2		16		GRW3021.1	0.303	0.473	0.447	0.399		16		GRW3021.1	0.425	0.503	0.5	0.484		16		GRW3021.1	0.333	0.375	0.373	0.367		16		GRW3021.1	0.39653	0.353244	0.356125	0.348424		16
	21		GSR2101.1	38	14	13	41		21		GSR2101.1	19	8	8	20		21		GSR2101.1	0.832	0.8	0.776	0.805		21		GSR2101.1	0.83	0.712	0.704	0.766		21		GSR2101.1	0.811	0.67	0.655	0.739		21		GSR2101.1	0.0591119	0.140978	0.137439	0.0865078		21
	22		GSR2103.1	49	20	16	53		22		GSR2103.1	14	8	7	14		22		GSR2103.1	0.95	0.653	0.741	0.797		22		GSR2103.1	0.885	0.727	0.726	0.803		22		GSR2103.1	0.87	0.684	0.68	0.779		22		GSR2103.1	0.0385256	0.133511	0.122491	0.0740888		22
	23		GSR2108.1	36	13	13	38		23		GSR2108.1	14	7	8	14		23		GSR2108.1	0.84	0.853	0.821	0.838		23		GSR2108.1	0.838	0.693	0.644	0.747		23		GSR2108.1	0.815	0.642	0.578	0.71		23		GSR2108.1	0.0565631	0.235911	0.2609	0.142643		23
	24		GSR2129.1	45	16	13	49		24		GSR2129.1	17	8	10	18		24		GSR2129.1	0.812	0.707	0.671	0.736		24		GSR2129.1	0.813	0.706	0.589	0.72		24		GSR2129.1	0.794	0.665	0.554	0.695		24		GSR2129.1	0.0606803	0.128178	0.198339	0.107617		24
	25		GSR2131.1	35	18	17	44		25		GSR2131.1	12	8	7	12		25		GSR2131.1	0.842	0.84	0.881	0.854		25		GSR2131.1	0.845	0.788	0.784	0.82		25		GSR2131.1	0.823	0.747	0.743	0.793		25		GSR2131.1	0.0673463	0.0997333	0.109758	0.0769953		25
	26		GSR2150.1	32	13	16	39		26		GSR2150.1	16	9	9	17		26		GSR2150.1	0.535	0.413	0.381	0.45		26		GSR2150.1	0.802	0.701	0.645	0.74		26		GSR2150.1	0.778	0.66	0.588	0.713		26		GSR2150.1	0.086168	0.1744	0.211349	0.128756		26
	27		GSR3114.1	29	25	23	36		27		GSR3114.1	10	8	8	11		27		GSR3114.1	0.743	0.813	0.788	0.778		27		GSR3114.1	0.839	0.846	0.816	0.849		27		GSR3114.1	0.815	0.82	0.785	0.829		27		GSR3114.1	0.0491128	0.0581333	0.0768166	0.0445531		27
	29		GSR3126.1	13	9	8	16		29		GSR3126.1	8	6	5	8		29		GSR3126.1	0.287	0.384	0.369	0.341		29		GSR3126.1	0.504	0.389	0.354	0.426		29		GSR3126.1	0.471	0.369	0.336	0.404		29		GSR3126.1	0.332222	0.376	0.410381	0.365188		29
	32		GSR3137.1	26	11	13	27		32		GSR3137.1	8	7	6	8		32		GSR3137.1	0.75	0.72	0.738	0.737		32		GSR3137.1	0.782	0.701	0.687	0.747		32		GSR3137.1	0.752	0.644	0.639	0.707		32		GSR3137.1	0.0834232	0.150222	0.149896	0.108498		32
	35		GSR3141.1	28	15	12	34		35		GSR3141.1	13	8	6	14		35		GSR3141.1	0.574	0.635	0.595	0.598		35		GSR3141.1	0.774	0.72	0.647	0.726		35		GSR3141.1	0.743	0.669	0.576	0.684		35		GSR3141.1	0.0951867	0.150933	0.20083	0.1304		35
	36		GSR5105.1	4	3	3	4		36		GSR5105.1	3	2	2	3		36		GSR5105.1	0.03	0.053	0.012	0.031		36		GSR5105.1	0.104	0.077	0.035	0.074		36		GSR5105.1	0.099	0.074	0.034	0.071		36		GSR5105.1	0.868248	0.874133	0.953772	0.89686		36
	37		GSR5112.1	5	8	6	8		37		GSR5112.1	3	4	3	4		37		GSR5112.1	0.515	0.662	0.788	0.646		37		GSR5112.1	0.514	0.617	0.638	0.597		37		GSR5112.1	0.445	0.544	0.562	0.53		37		GSR5112.1	0.29948	0.257956	0.27308	0.240704		37
	38		GSR5114.1	23	4	7	26		38		GSR5114.1	11	3	4	12		38		GSR5114.1	0.663	0.347	0.386	0.483		38		GSR5114.1	0.695	0.385	0.379	0.527		38		GSR5114.1	0.651	0.337	0.322	0.476		38		GSR5114.1	0.140672	0.421511	0.430035	0.280574		38
	39		GSR5122.1	19	10	8	19		39		GSR5122.1	6	6	5	6		39		GSR5122.1	0.723	0.56	0.671	0.659		39		GSR5122.1	0.781	0.615	0.601	0.694		39		GSR5122.1	0.742	0.546	0.515	0.64		39		GSR5122.1	0.0883247	0.260444	0.298547	0.170094		39
	40		GSR5127.1	7	5	4	7		40		GSR5127.1	4	3	3	4		40		GSR5127.1	0.313	0.306	0.212	0.277		40		GSR5127.1	0.46	0.33	0.216	0.353		40		GSR5127.1	0.397	0.297	0.204	0.319		40		GSR5127.1	0.331438	0.444622	0.626574	0.441464		40
	41		GSR5129.1	9	6	4	9		41		GSR5129.1	4	4	3	4		41		GSR5129.1	0.406	0.28	0.365	0.356		41		GSR5129.1	0.606	0.386	0.371	0.479		41		GSR5129.1	0.55	0.328	0.305	0.425		41		GSR5129.1	0.219684	0.453867	0.460484	0.342523		41
	47		NSX02.1	39	22	17	48		47		NSX02.1	18	10	7	19		47		NSX02.1	0.891	0.84	0.859	0.866		47		NSX02.1	0.864	0.826	0.788	0.838		47		NSX02.1	0.846	0.795	0.75	0.816		47		NSX02.1	0.052838	0.0784	0.0934256	0.0551225		47
	50		NSX34.1	40	10	8	42		50		NSX34.1	18	6	5	18		50		NSX34.1	0.693	0.587	0.741	0.678		50		NSX34.1	0.808	0.632	0.619	0.707		50		NSX34.1	0.783	0.559	0.544	0.663		50		NSX34.1	0.107735	0.204267	0.266159	0.172296		50
	54		NSX48.1	13	5	5	13		54		NSX48.1	7	4	4	7		54		NSX48.1	0.376	0.24	0.153	0.264		54		NSX48.1	0.705	0.505	0.327	0.55		54		NSX48.1	0.663	0.434	0.291	0.504		54		NSX48.1	0.185178	0.366044	0.562907	0.329693		54
	55		NSX53.1	6	4	4	6		55		NSX53.1	4	2	2	4		55		NSX53.1	0.165	0.271	0.143	0.188		55		NSX53.1	0.536	0.392	0.279	0.468		55		NSX53.1	0.431	0.313	0.239	0.372		55		NSX53.1	0.293991	0.396622	0.595848	0.357584		55
	56		NSX67.1	21	10	10	24		56		NSX67.1	8	6	6	9		56		NSX67.1	0.64	0.613	0.494	0.585		56		NSX67.1	0.756	0.634	0.58	0.687		56		NSX67.1	0.711	0.571	0.509	0.637		56		NSX67.1	0.102245	0.249067	0.23654	0.157029		56
	57		NSX79.1	23	17	16	28		57		NSX79.1	10	7	7	10		57		NSX79.1	0.82	0.72	0.647	0.735		57		NSX79.1	0.808	0.748	0.672	0.771		57		NSX79.1	0.775	0.718	0.64	0.743		57		NSX79.1	0.0781296	0.113244	0.146298	0.0847169		57
	61		NSX119.1	15	9	8	15		61		NSX119.1	6	4	4	6		61		NSX119.1	0.663	0.667	0.718	0.682		61		NSX119.1	0.742	0.638	0.614	0.676		61		NSX119.1	0.704	0.575	0.559	0.631		61		NSX119.1	0.102245	0.244444	0.222976	0.16114		61
	73		NSX175.1	30	22	19	44		73		NSX175.1	16	9	10	17		73		NSX175.1	0.822	0.867	0.765	0.816		73		NSX175.1	0.789	0.772	0.733	0.77		73		NSX175.1	0.763	0.736	0.687	0.74		73		NSX175.1	0.0775414	0.123556	0.11917	0.0923504		73
	74		NSX186.1	37	15	10	43		74		NSX186.1	14	9	7	15		74		NSX186.1	0.772	0.507	0.412	0.579		74		NSX186.1	0.802	0.543	0.401	0.628		74		NSX186.1	0.777	0.51	0.369	0.6		74		NSX186.1	0.0681306	0.313422	0.399031	0.205707		74
	77		SRPE03.1	5	5	6	7		77		SRPE03.1	3	4	5	5		77		SRPE03.1	0.455	0.467	0.518	0.479		77		SRPE03.1	0.457	0.436	0.495	0.466		77		SRPE03.1	0.387	0.35	0.393	0.382		77		SRPE03.1	0.357906	0.416178	0.375225	0.373967		77
	81		TSRA107.1	16	10	9	18		81		TSRA107.1	7	5	4	7		81		TSRA107.1	0.66	0.587	0.726	0.66		81		TSRA107.1	0.701	0.623	0.635	0.669		81		TSRA107.1	0.646	0.556	0.57	0.615		81		TSRA107.1	0.13381	0.210311	0.221038	0.163195		81
	82		TSRA108.1	16	9	10	20		82		TSRA108.1	9	4	5	9		82		TSRA108.1	0.653	0.662	0.588	0.635		82		TSRA108.1	0.653	0.594	0.59	0.618		82		TSRA108.1	0.605	0.522	0.511	0.559		82		TSRA108.1	0.15871	0.262933	0.262284	0.210434		82
	83		TSRA109.1	10	5	10	12		83		TSRA109.1	6	4	5	7		83		TSRA109.1	0.426	0.627	0.576	0.533		83		TSRA109.1	0.549	0.552	0.572	0.557		83		TSRA109.1	0.444	0.452	0.485	0.462		83		TSRA109.1	0.289677	0.340089	0.281661	0.292347		83
	86		TSGR222.1	11	7	7	13		86		TSGR222.1	4	5	5	5		86		TSGR222.1	0.57	0.373	0.412	0.462		86		TSGR222.1	0.675	0.373	0.376	0.527		86		TSGR222.1	0.613	0.344	0.346	0.48		86		TSGR222.1	0.159886	0.435378	0.425329	0.27482		86
	90		TSGR282.1	17	9	9	18		90		TSGR282.1	8	6	6	8		90		TSGR282.1	0.296	0.573	0.482	0.438		90		TSGR282.1	0.69	0.671	0.649	0.677		90		TSGR282.1	0.649	0.612	0.579	0.628		90		TSGR282.1	0.188903	0.2224	0.19391	0.176172		90
	91		NSX16.1	3	3	3	3		91		NSX16.1	2	2	2	2		91		NSX16.1	0.158	0.067	0.082	0.107		91		NSX16.1	0.163	0.09	0.101	0.122		91		NSX16.1	0.149	0.085	0.095	0.114		91		NSX16.1	0.716891	0.851022	0.827543	0.7882		91
	92		NSX27.1	20	15	15	24		92		NSX27.1	8	6	6	8		92		NSX27.1	0.832	0.773	0.8	0.805		92		NSX27.1	0.764	0.743	0.728	0.751		92		NSX27.1	0.735	0.702	0.682	0.719		92		NSX27.1	0.0908734	0.12	0.150173	0.0994554		92
	93		NSX28.1	20	12	9	21		93		NSX28.1	9	7	5	9		93		NSX28.1	0.59	0.533	0.518	0.55		93		NSX28.1	0.728	0.601	0.496	0.628		93		NSX28.1	0.692	0.547	0.461	0.589		93		NSX28.1	0.128125	0.252622	0.291903	0.192995		93
	95		NSX87.1	4	4	3	4		95		NSX87.1	2	2	2	2		95		NSX87.1	0.17	0.3	0.2	0.218		95		NSX87.1	0.334	0.331	0.38	0.349		95		NSX87.1	0.277	0.275	0.307	0.287		95		NSX87.1	0.427311	0.445689	0.482076	0.442756		95
	96		NSX94.1	21	13	9	25		96		NSX94.1	8	6	5	8		96		NSX94.1	0.76	0.56	0.588	0.646		96		NSX94.1	0.766	0.691	0.623	0.713		96		NSX94.1	0.725	0.63	0.558	0.661		96		NSX94.1	0.104794	0.156622	0.210796	0.135274		96
	98		NSX129.1	8	4	5	8		98		NSX129.1	4	3	3	4		98		NSX129.1	0.525	0.52	0.565	0.536		98		NSX129.1	0.613	0.51	0.569	0.575		98		NSX129.1	0.535	0.385	0.471	0.482		98		NSX129.1	0.280267	0.372089	0.337578	0.316129		98
	99		NSX148.1	5	3	2	6		99		NSX148.1	4	2	2	4		99		NSX148.1	0.129	0.013	0.082	0.08		99		NSX148.1	0.14	0.065	0.079	0.099		99		NSX148.1	0.134	0.062	0.076	0.095		99		NSX148.1	0.769238	0.922489	0.848858	0.836379		99
	103		NSX179.1	5	3	3	5		103		NSX179.1	3	2	2	3		103		NSX179.1	0.446	0.493	0.506	0.479		103		NSX179.1	0.508	0.502	0.485	0.506		103		NSX179.1	0.392	0.374	0.366	0.383		103		NSX179.1	0.336732	0.373156	0.395709	0.35459		103
	104		TSA10A29.1	22	10	10	24		104		TSA10A29.1	8	6	6	8		104		TSA10A29.1	0.417	0.533	0.329	0.422		104		TSA10A29.1	0.72	0.67	0.618	0.675		104		TSA10A29.1	0.686	0.614	0.567	0.634		104		TSA10A29.1	0.145966	0.186133	0.245952	0.178638		104
	108		SSR07A17.1	20	7	6	20		108		SSR07A17.1	11	5	5	11		108		SSR07A17.1	0.495	0.427	0.176	0.372		108		SSR07A17.1	0.604	0.427	0.186	0.439		108		SSR07A17.1	0.565	0.383	0.178	0.409		108		SSR07A17.1	0.210274	0.366044	0.672249	0.367038		108
	114		SSR07B05.1	8	6	7	11		114		SSR07B05.1	5	5	5	6		114		SSR07B05.1	0.386	0.44	0.635	0.483		114		SSR07B05.1	0.576	0.525	0.544	0.552		114		SSR07B05.1	0.481	0.422	0.438	0.453		114		SSR07B05.1	0.25027	0.306311	0.367474	0.278196		114
	116		SSR07B09.3	14	8	7	15		116		SSR07B09.3	8	4	4	8		116		SSR07B09.3	0.574	0.533	0.376	0.498		116		SSR07B09.3	0.639	0.548	0.465	0.567		116		SSR07B09.3	0.591	0.483	0.408	0.519		116		SSR07B09.3	0.174395	0.341867	0.363045	0.248044		116
	119		SSR07B25.1	43	23	21	47		119		SSR07B25.1	11	8	8	11		119		SSR07B25.1	0.792	0.811	0.882	0.827		119		SSR07B25.1	0.879	0.808	0.765	0.831		119		SSR07B25.1	0.862	0.777	0.726	0.81		119		SSR07B25.1	0.0344084	0.0776889	0.129412	0.0577061		119
	120		SSR07B30.3	19	9	9	20		120		SSR07B30.3	9	4	4	9		120		SSR07B30.3	0.614	0.6	0.729	0.648		120		SSR07B30.3	0.744	0.667	0.674	0.708		120		SSR07B30.3	0.698	0.597	0.601	0.651		120		SSR07B30.3	0.120478	0.201422	0.202768	0.152596		120
	123		SSR08A07.2	14	9	9	14		123		SSR08A07.2	6	5	5	6		123		SSR08A07.2	0.673	0.68	0.694	0.682		123		SSR08A07.2	0.681	0.644	0.6	0.647		123		SSR08A07.2	0.638	0.579	0.534	0.596		123		SSR08A07.2	0.145182	0.199289	0.261176	0.181368		123
	125		SSR08A14.2	9	4	4	9		125		SSR08A14.2	5	3	3	5		125		SSR08A14.2	0.535	0.307	0.365	0.414		125		SSR08A14.2	0.564	0.442	0.338	0.478		125		SSR08A14.2	0.467	0.349	0.284	0.389		125		SSR08A14.2	0.282031	0.396267	0.499516	0.351859		125
	128		SSR08B02.1	13	10	6	13		128		SSR08B02.1	6	4	4	6		128		SSR08B02.1	0.586	0.649	0.682	0.636		128		SSR08B02.1	0.701	0.692	0.611	0.671		128		SSR08B02.1	0.642	0.629	0.528	0.608		128		SSR08B02.1	0.138516	0.159822	0.266159	0.171181		128
	130		SSR08B13.2	9	4	4	9		130		SSR08B13.2	5	3	3	5		130		SSR08B13.2	0.614	0.547	0.612	0.594		130		SSR08B13.2	0.577	0.505	0.512	0.538		130		SSR08B13.2	0.485	0.382	0.391	0.429		130		SSR08B13.2	0.298696	0.393067	0.423668	0.359493		130
	134		SSR08B22.1	7	6	7	9		134		SSR08B22.1	4	3	4	5		134		SSR08B22.1	0.535	0.733	0.753	0.663		134		SSR08B22.1	0.541	0.662	0.67	0.641		134		SSR08B22.1	0.488	0.584	0.594	0.57		134		SSR08B22.1	0.270464	0.214578	0.217163	0.20377		134
	139		SSR08B31.2	19	6	6	21		139		SSR08B31.2	7	5	4	7		139		SSR08B31.2	0.733	0.467	0.459	0.567		139		SSR08B31.2	0.718	0.541	0.471	0.619		139		SSR08B31.2	0.673	0.452	0.379	0.547		139		SSR08B31.2	0.129889	0.310933	0.371073	0.217774		139
	142		SSR08B38.1	14	8	10	16		142		SSR08B38.1	8	4	4	8		142		SSR08B38.1	0.743	0.653	0.835	0.747		142		SSR08B38.1	0.71	0.662	0.687	0.693		142		SSR08B38.1	0.656	0.592	0.63	0.637		142		SSR08B38.1	0.149691	0.180444	0.210796	0.16478		142
	144		SSR08B44.2	14	8	10	16		144		SSR08B44.2	8	4	4	8		144		SSR08B44.2	0.743	0.653	0.835	0.747		144		SSR08B44.2	0.71	0.662	0.687	0.693		144		SSR08B44.2	0.656	0.592	0.63	0.637		144		SSR08B44.2	0.149691	0.180444	0.210796	0.16478		144
	145		SSR08B47.1	14	8	10	16		145		SSR08B47.1	8	4	4	8		145		SSR08B47.1	0.743	0.653	0.835	0.747		145		SSR08B47.1	0.71	0.662	0.687	0.693		145		SSR08B47.1	0.656	0.592	0.63	0.637		145		SSR08B47.1	0.149691	0.180444	0.210796	0.16478		145
	149		SSR08B64.1	21	6	7	21		149		SSR08B64.1	8	4	5	8		149		SSR08B64.1	0.614	0.493	0.259	0.464		149		SSR08B64.1	0.655	0.456	0.319	0.514		149		SSR08B64.1	0.612	0.414	0.297	0.485		149		SSR08B64.1	0.196157	0.331556	0.526367	0.287121		149
	154		SSR08B82.1	13	10	8	13		154		SSR08B82.1	7	4	4	7		154		SSR08B82.1	0.743	0.667	0.753	0.724		154		SSR08B82.1	0.737	0.702	0.659	0.706		154		SSR08B82.1	0.686	0.642	0.594	0.651		154		SSR08B82.1	0.124596	0.154844	0.211903	0.149308		154
	162		SSR11B14.1	11	6	9	13		162		SSR11B14.1	5	4	5	6		162		SSR11B14.1	0.495	0.427	0.353	0.429		162		SSR11B14.1	0.521	0.431	0.412	0.461		162		SSR11B14.1	0.481	0.39	0.373	0.424		162		SSR11B14.1	0.271444	0.394489	0.412318	0.344842		162
	167		TSGR906.1	7	3	3	7		167		TSGR906.1	4	2	2	4		167		TSGR906.1	0.307	0.28	0.235	0.276		167		TSGR906.1	0.532	0.5	0.495	0.514		167		TSGR906.1	0.422	0.373	0.371	0.395		167		TSGR906.1	0.304578	0.3408	0.356125	0.325582		167
	170		TSR8EM28.2	4	6	4	6		170		TSR8EM28.2	2	3	2	3		170		TSR8EM28.2	0.351	0.589	0.598	0.5		170		TSR8EM28.2	0.494	0.53	0.499	0.509		170		TSR8EM28.2	0.37	0.414	0.373	0.387		170		TSR8EM28.2	0.317714	0.376	0.412318	0.34173		170
	171		TSRB07.2	13	7	8	16		171		TSRB07.2	7	5	4	8		171		TSRB07.2	0.317	0.68	0.56	0.5		171		TSRB07.2	0.682	0.634	0.594	0.641		171		TSRB07.2	0.623	0.555	0.504	0.571		171		TSRB07.2	0.192432	0.218844	0.274187	0.195813		171
	180		TSRF120.1	6	3	5	7		180		TSRF120.1	3	2	3	3		180		TSRF120.1	0.475	0.333	0.548	0.458		180		TSRF120.1	0.539	0.503	0.507	0.521		180		TSRF120.1	0.443	0.375	0.383	0.408		180		TSRF120.1	0.298892	0.333333	0.382976	0.321032		180
	192		TSRF172.1	30	12	14	35		192		TSRF172.1	11	5	6	12		192		TSRF172.1	0.842	0.68	0.595	0.715		192		TSRF172.1	0.82	0.67	0.597	0.728		192		TSRF172.1	0.791	0.616	0.554	0.691		192		TSRF172.1	0.0636212	0.176178	0.210242	0.116337		192
	211		TSRF238.1	1	1	1	1		211		TSRF238.1	1	1	1	1		211		TSRF238.1	0	0	0	0		211		TSRF238.1	0	0	0	0		211		TSRF238.1	0	0	0	0		211		TSRF238.1	1	1	1	1		211
	222		CX0010.2	19	7	6	21		222		CX0010.2	10	5	4	11		222		CX0010.2	0.733	0.627	0.6	0.659		222		CX0010.2	0.71	0.545	0.552	0.619		222		CX0010.2	0.657	0.439	0.446	0.544		222		CX0010.2	0.149103	0.384889	0.340346	0.255031		222
	225		CX2018.2	46	17	14	55		225		CX2018.2	19	11	9	20		225		CX2018.2	0.861	0.613	0.518	0.678		225		CX2018.2	0.86	0.631	0.494	0.708		225		CX2018.2	0.844	0.607	0.473	0.69		225		CX2018.2	0.0414665	0.198933	0.276125	0.123442		225
	226		CX2021.2	17	11	10	21		226		CX2021.2	7	5	5	8		226		CX2021.2	0.792	0.68	0.788	0.759		226		CX2021.2	0.729	0.663	0.689	0.7		226		CX2021.2	0.683	0.599	0.623	0.646		226		CX2021.2	0.126164	0.182222	0.196955	0.153301		226
	229		CX3040.3	34	17	11	36		229		CX3040.3	13	8	5	13		229		CX3040.3	0.76	0.707	0.671	0.715		229		CX3040.3	0.838	0.746	0.677	0.772		229		CX3040.3	0.813	0.703	0.616	0.738		229		CX3040.3	0.0547985	0.124978	0.170104	0.0978112		229
	231		CX4008.3	9	7	7	12		231		CX4008.3	5	4	4	6		231		CX4008.3	0.535	0.453	0.424	0.475		231		CX4008.3	0.593	0.496	0.438	0.524		231		CX4008.3	0.514	0.43	0.385	0.456		231		CX4008.3	0.245564	0.335467	0.381592	0.303798		231
	232		CX4040.3	18	12	9	21		232		CX4040.3	8	7	5	10		232		CX4040.3	0.713	0.653	0.482	0.621		232		CX4040.3	0.772	0.649	0.442	0.667		232		CX4040.3	0.732	0.613	0.409	0.63		232		CX4040.3	0.0955789	0.162667	0.345329	0.156677		232
	239		CX6F32.2	2	4	4	4		239		CX6F32.2	2	3	3	3		239		CX6F32.2	0.238	0.333	0.435	0.33		239		CX6F32.2	0.21	0.383	0.371	0.318		239		CX6F32.2	0.187	0.322	0.305	0.272		239		CX6F32.2	0.637683	0.438222	0.472941	0.509285		239
	243		F21.2	8	4	3	8		243		F21.2	4	3	2	4		243		F21.2	0.68	0.493	0.459	0.553		243		F21.2	0.569	0.427	0.463	0.504		243		F21.2	0.471	0.34	0.354	0.403		243		F21.2	0.320263	0.438933	0.396817	0.358935		243
			IV: 101 indigenous varieties, HV: 75 hybrid varieties, SL: 85 selected strains ALL: 261 representative varieties/lines selected by identity test.
			Cert. - certified DNA markers by family test.
[truncated: 19 more columns]
